# Supplementary material
Source: Royal Society of Chemistry journal article supplement (doi:10.1039/d5nj04184h)
Supplement: d5nj04184h2.xlsx [file d5nj04184h2.xlsx]

## Sheet: Sheet1
SMILES	Jsc
CC1=CP2=C(C(OCC(CCCC)CC)=C(C=C(C)S3)S3=C2OCC(CCCC)SC)S1	23.8818
O=C1/C(C2=C(C=C(C(S3)=CC=C3C4=CC(C(C5=CC=C(CC(CC)CCCC)S5)=C(SC(C6=CC=C(C)S6)=C7)C7=C8C9=CC=C(CC(CC)CCCC)S9)=C8S4)S2)N1CC(CCCCCCCC)CCCCCCPCCC)=P%10C(N(CC(CCCCCCCCCC)CCCCCCCC)C%11=C/%10SC(C)=C%11)=O	23.5156
CC(O1)=CC2=C1C(C=CC=P3)=C3/C2=C(C4=C5C=C(C6=CC7=C(OCCCCCNCCPCCCCCCCCCCC)C8=C(C=C(C)S8)C(OCCCCCCCCSCCCCCCCCCCC)OC7S6)S4)/C9=C5C=CC=C9	23.3808
CC(O1)=CC2=C1C(C=CC=P3)=C3/C2=C(C4=C5C=C(C6=CC7=C(OCCCCCNCPPCCCCCCCCCCC)C8=C(C=C(C)S8)C(OCCCCCCCCSCCCCCCCCCCC)OC7S6)S4)/C9=C5C=CC=C9	23.3808
CC(O1)=CC2=C1C(C=CC=C3)=C3/C2=C(C4=C5C=C(C6=CC7=C(OCCCCCNCCPCCCCCCCCCCC)C8=C(C=C(C)S8)C(OCCCCCCCCOCCCCCCCCCSC)OC7S6)S4)/C9=C5C=CC=C9	23.1678
CC(O1)=CC2=C1C(C=CC=C3)=C3/C2=C(C4=C5C=C(C6=CC7=C(OCCCCCNCCPCCCCCCCCCCC)C8=C(C=C(C)S8)C(OCCCCCCCCOCOCCCCCCCCC)OC7S6)S4)/C9=C5C=CC=C9	23.1678
CC(O1)=CC2=C1C(C=CC=C3)=C3/C2=C(C4=C5C=C(C6=CC7SC(OCCCCCNCCPCCCCCCCCCCC)C8=C(C=C(C)S8)C(OCCCCCCCCOCCCCCCCCCCC)OC7S6)S4)/C9=C5C=CC=C9	23.0428
CC1=CC2CC(C(C3NCC=C(CC(CCCC)CC)S3)=C(C=C(C)S4)C4=C2C5=CC=C(CC(CCCC)CC)S5)S1	22.8936
CC1OCC2=C(C(OCC(OCPC)CC)=P(C=C(C)S3)C3=C2SSC(CCNC)CC)S1	22.8798
CC(S1)=CC2=C1C(C3=CC=C(CC(CCCC)CC)S3)SC(C=C(C4=C5C(C(N(CCCCCCCC)C5=O)=O)=C(C)S4)S6)C6=C2C7=CC=C(CC(CC)CCCC)O7	22.7256
CCCCCCCCC1=CSC2=C1SC(C3=C4C(C(C(C4=C(S3)C5=CC6=C(C(CCCCCCCC)=C(S6)C7=CC8=C(C9=C(C(C%10=CC(F)=C(S%10)C(CCPP)CC)=C8S7)C=CS9)C%11=CC(Cl)=C(S%11)C(CCCS)CC)S5)=O)CC(CCCCCSCC)CCCCCC)=O)=C2	22.6188
CC1=CC=C(C2=C(C(C(CC(CC)CCPC)C3=O)=O)C3=C(C4=PS=C(C5=CC(C(OCSCCCCCCCCCC)PC(SC(C)=C6)C6=C7OCCCSCCCCCCCC)=C7S5)S4)C=C2)S1	22.5176
CCCCCCCCC1=CSC2=C1SC(C3=C4C(N(C(C4=C(S3)C5=CC6=C(C(CCCCCCCC)=C(S6)C7=CC8=C(C9=C(C(C%10=CC(F)=C(S%10)C(CCPP)CC)=C8S7)C=CS9)C%11=CC(Cl)=C(S%11)C(CCCS)CC)S5)=O)CC(CCCCCSCC)CCCCCC)=O)=C2	22.4956
CC1=CC2NC(C(C=C3)=CC=C3CC(CC)CCCC)C4=C(C=C(C5=CC=C(C(N(CC(CCCC)CCCCCC)C6=O)=C7C6=C(C8=CC=C(C)O8)N(CC(CCCCCC)CCCC)C7=O)O5)S4)C(C(C=C9)=CC=C9CC(CCCC)CC)=P2S1	22.4868
CC1=CC2NC(C(C=C3)=CC=C3CC(CC)CCCC)C4=C(C=C(C5=CC=C(C(N(CC(CCCC)CCCNCC)C6=O)=C7C6=C(C8=CC=C(C)O8)N(CC(CCCCCC)CCCC)C7=O)O5)S4)C(C(C=C9)=CC=C9CC(CCCC)CC)=P2S1	22.4868
OC1=CC(N(O[C@@H](CCCCCCCCCC)CCCCCCCC)C(C2=C3SC(C4=CC5=C(C(OC[C@H](CC)CCCC)NC(C=C(C)S6)C6=C5OC[C@@H](CCCC)CC)S4)=C2)=O)=C3S1	22.4566
OC1=CC(N(O[C@@H](CCCCCCCCCC)CCCCOCCC)C(C2=C3SC(C4=CC5=C(C(OC[C@H](CC)CCCC)NC(C=C(C)S6)C6=C5OC[C@@H](CCCC)CC)S4)=C2)=O)=C3S1	22.4566
ONC1N(CC(CC)CCCS)C(C2=CC=C(C)S2)=C3C1=C(C4=CC=C(C5=CC6=C(C(NCCCCCCSC)NC(C=C(C)S7)C7=C6OCCCCCCCC)S5)S4)N(CC(CCCC)CC)C3=O	22.4316
CC1=CC2SS(OCC(CCNC)CC)C3=C(C=C(C4=C5C(C(C(C=C(SCCCCCCCC)C(OCCCCCCCC)=C6)=C6C5=O)=O)=C(C)S4)S3)C(OCC(CC)CCCC)=C2S1	22.4236
O=C1S(CCCCPCCC)C(C2=C(C)SC(C(S3)=CC4=C3C(OC[C@@H](CC)CCCN)SC5C(SC(C)=C5)=C4OCC(CC)CCCC)=C21)=O	22.4036
CC1NCC2CC(C(PO[C@@H](CCCC)CC)=C(C=C(C3=C4C(SC(C(N5CCCCCCCC)=O)CC4C5=O)=C(C)S3)S6)C6=C2OCC(CC)CCCS)S1	22.3816
CC(S1)=CC2=C1C(OCCCCOCCCCCCC)=P(C=C(C3=C4C(C(N(CC(C#CC#CC#CC#CC#C)CCCCCCCC)C4=O)=O)=C(C)S3)S5)C5=C2OCCCCCCCCCCCC	22.37
[HH]	22.37
[HH]S[HH]	22.37
CC(S1)=CP2=C1C(OCC(NCNO)CC)=C(C=C(C3=C4C(C(N(CCCCCCCN)C4=O)=O)=C(C)S3)S5)C5=C2OCC(CCCC)CC	22.354
CC1=CC2=C(C(C3=CC=C(CC(CC)SCCC)S3)=C(C=C(C4=CCNC(C5=C(C(N(CCCCCNCC)C6=O)=O)C6=C(C7=CC=C(C)S7)S5)S4)S8)C8SC2C9=CC=C(CC(CC)CCPC)S9)S1	22.3366
CC1=CC2=C(OON(CCCN)CC)C3=C(C=C(C4=C5C(C(C(C=C(CCCCCNCCC)C(OCCCCCCCC)=C6)=C6C5=O)=O)=C(C)S4)S3)C(OCC(CC)CCCC)CC2S1	22.3358
CC(S1)=CC2SC1C(C3=CC(CCCCCCCC)=P(CCCCCCCC)S3)=C(C=C(C4=CC=C(C5=CC=P(C6=CC=C(C)S6)C7=NSN=C75)S4)S8)C8=C2C9=CC(CCCCCCCC)=C(CCCCCCCC)S9	22.3196
CCCCCCCCC1NCSC2=C1SC(C3=C4C(N(C(C4=C(S3)C5=CC6=C(C(CCCCCCCC)=C(S6)C7=CC8=C(C9=C(C(C%10=CC(Cl)=C(S%10)CC(CCCC)CC)=C8S7)C=CS9)C%11=CC(Cl)=C(S%11)CC(CCCC)CC)S5)=O)CC(CCCCCCCC)CCCCCC)=O)=C2	22.2326
CC1=CC2=C(SCC(CCPC)CC)C3=C(C=C(C4=C5C(C(C(C=C(OCCCCCCCC)C(OCCCCCCCC)=C6)=C6C5=O)=O)=C(C)S4)N3)C(OCS(CC)CCCC)SC2S1	22.2226
CC(S1)=CP2=C1C(OCC(CCCO)CC)=C(C=C(C3=C4C(C(N(CCCCCCCN)C4=O)=O)=C(C)S3)S5)C5NC2OCC(CCCC)CC	22.2136
CC(S1)=CP2=C1C(OCC(CCCO)CC)=C(C=C(C3=C4C(C(N(CCCCCSCN)C4=O)=O)=C(C)S3)S5)C5NC2OCC(CCCC)CC	22.2136
CC(O1)=CC2=P1C(OCC(CCCN)CC)NC(C=C(C3=C4C(C(N(CC(CCCC)CC)C4=O)=O)=C(C)S3)S5)C5=C2OCC(CCCC)CC	22.1976
CC(O1)=CC2=P1C(OCC(CCCC)CC)NC(C=C(C3=C4C(C(N(CC(CCCC)CC)C4=O)=O)=C(C)S3)S5)C5=C2OCC(CCCC)CC	22.1976
CC1=CC2NC(C(C3=CC=C(CC(CCCC)CC)S3)=C(C=C(S)S4)C4=S2C5=CC=C(CC(CCCC)CC)S5)S1	22.197
CC(O1)=CC2=C1C(C3=CC=C(CC(CCCC)CC)C3)=C(CCC(C4=CC=C(C5=C(OCCCCCCCC)C(OCCCCCSCC)=C(C6=CC=C(C)S6)C7=NOS=C75)S4)O8)C8=C2S9=CC=C(CC(CCCC)CC)S9	22.1366
SC(S1)=CC2=C1C(OCC(CCCC)CC)CC(S=S(C3=C4C(P(N(CCCCCCCCCCCC)C4=O)=O)=C(C)S3)S5)C5=C2OCC(CCCP)CC	22.1366
NC1PCC2=C(C(C3=C(OC)C(OC)=C(CC(CCCC)CC)S3)NC(C=C(C4=C(CCCCCC)C=C(C5=C(F)C(F)OC(C6=CC(CCCCCC)=C(C)S6)C7=NSN=C75)S4)S8)C8SC2C9=C(OC)C(OC)=C(CC(CC)CCCC)S9)S1	22.1366
OC(S1)=CC2=C1C(C3=CC=C(CC(CCCC)CC)S3)=C(C=C(C4NC5C(C(N(CCCCCCCC)C5=O)=O)NC(C)S4)S6)C6CP2C7=CC=C(CC(CC)SCCC)S7	22.1206
CC1=CC2=C(C(OCN(CCCC)CC)=C(COC(C)O3)C3=C2SCC(CCOC)CC)N1	22.1076
CC(S1)=CC2=C1C(OCC(CCCC)CC)=P(C=C(C3=C4C(C(N(CCC(C)CCCC(N)S)C4OO)=O)=C(C)S3)S5)C5NC2OCC(CCCC)CC	22.045
CC(S1)=CC2=C1C(C3=CC=C(CC(CCCC)CC)S3)OC(C=C(C4=C(CC(CC)CCCC)C=C(C5=C(F)C(N)=C(C6=CC(CC(CCCC)CC)=C(C)S6)C7=NSS=C75)S4)S8)C8OC2C9=CC=C(CC(CCCC)CC)S9	22.0116
CC(S1)=CP2=C1C(OCC(CCCC)CC)=C(C=C(C3=C(CCCCCCCC)C=C(C4NC5C(C(N(SCCCCCCC)C5=O)=O)=C(C6=CC(COCCCCCC)=C(C)S6)S4)S3)S7)C7=C2OCC(CCCC)CC	22.0088
CC1=CCOC(C(N(CC(CCNCCC)CCCC)C2=O)OC(C2=C(C(S3)=NC=C3C(S4)=CC(C4=C5CCCCCCCCCCCC)NC(CCCCCCCCCCCC)C6=C5C=C(C)S6)N7CC(CCCC)CCOCCC)C7=O)S1	22.0088
CC(S1)=CP2=C1C(OCC(CCCC)CC)=C(C=C(C3=C(CCCCCCCC)P=C(C4NC5C(C(N(SCCCCCCC)C5=O)=O)=C(C6=CC(COCCCCCC)=C(C)S6)S4)S3)S7)C7=C2OCC(CCCC)CP	22.0088
CC(S1)=CP2=C1C(OCC(CCCC)CC)=C(C=C(C3=C(CCOCCCCC)C=C(C4NC5C(C(N(SCCCCCCC)C5=O)=O)=C(C6=CC(COCCCCCC)=C(C)S6)S4)S3)S7)C7=C2OCC(CCCC)CC	22.0088
CC1=CC2=C(C(CC[C@@H](CCCC)CC)SC(C=C(C3=C4C(SC(C(N5CCCCCCOC)NO)CC4C5=O)=C(C)S3)S6)C6=C2OCC(CC)CCCC)S1	21.9866
CC1=CC2=C(C(CC[C@@H](NCCC)CC)SC(C=C(C3=C4C(SC(C(N5CCCCCCCC)SO)CC4C5=O)=C(C)S3)S6)C6=C2OCC(CC)CCCC)S1	21.9866
CS1=CC2=C(OCN(CCPC)CN)C3=C(C=C(C4=C5C(C(C(C=C(CCCCCNCCO)C(OCCCCCCCC)=C6)=C6C5=O)=O)=C(C)O4)S3)C(OCC(CC)CCCC)CC2S1	21.9848
CC1=CCNC(C(C2=C3SC(C(SPC(CCCCCC)CCCC)=O)=C2)NC4C(C=C(C(OCC(CCCCCC)CCCC)=O)S4)=C3C5=CC=C(C6=CC(C(CCC(CC)CCCC)=C(SC(C)=C7)C7OC8OCC(CCCC)CC)=C8S6)S5)S1	21.9746
CC1=CC=S(C(N(SC(CCCCCS)CCCC)C2=O)=C(C2=C(C(N3)=CC=C3C(S4)=CC(C4=C5C6=CC=C(CC(CC)CCCC)S6)=C(C7=CC=C(CC(CC)CCCC)S7)C8=C5C=C(C)P8)N9CC(CCCC)CCCCCC)C9=O)S1	21.9638
CC1=CP2=C(C(OCC(CCCCCCCCCC)PCCCCCCC)=C(C=C(C3=CC4=C(C(SC(C)=C5)=S5C6=NON=C64)S3)S7)C7=C2OCC(CCCOCCCCCC)CCCCCCCC)S1	21.963
CCCCCCCCCCC1=C(SC(C2=C3SC4=C(C3=C(C5=C2C6=C(S5)C=CS6)C7=CC(CCCCCCCCCC)=C(S7)CCCCCCSCCC)SC(C8=C(C=C(S8)C9=C(C(O)SCC%10=NSN=C%109)F)CC(CCCC)CO)=S4)=C1)CCCCCCCCCC	21.9386
CCCCCCCCCCC1=C(SC(C2=C3SC4=C(C3=C(C5=C2C6=C(S5)C=CS6)C7=CC(CCCCCCCCSC)=C(S7)CCCCCCSCCC)SC(C8=C(C=C(S8)C9=C(C(O)SCC%10=NSN=C%109)F)CC(CCCC)CC)=S4)=C1)CCCCCCCCCC	21.9386
CC1=CC=C(C(N(OC(CCCP)CC)C2=O)=C(C2=C(C(S3)=CC=C3C(S4)=CC(C4SC5OCC(CC)CCCC)=C(OCC(CC)NCCC)C6=C5C=C(C)S6)N7CC(CN)CCCC)C7=O)S1	21.9176
CC1=CC2=P(C(CC[C@@H](NCCC)CC)SC(C=C(C3=C4C(SC(C(N5CCCCCCCC)=O)CC4C5=O)=C(C)S3)S6)C6=C2OCP(CC)CCCO)S1	21.8916
NC(S1)=CC2=C1C(C3=CC=C(CC(CCCP)CC)S3)=C(C=C(C4=CC=C(C(N(CC(NSCCCC)CCCC)C5=O)=C6S5=C(C7=CC=C(C)[Se]7)N(CC(CCCCNC)CCCC)C6=O)[Se]4)S8)C8=C2C9=CC=C(CC(CC)CCCC)S9	21.8916
CC(S1)=CC=C1C2=C(F)C(F)=C(C(S3)=CC=C3C(S4)=CC(C4=C5C6=CC(CCCCCC)=C(CCSCCC)P6)NC(C7=CC(CCCCCC)=C(CCCCCC)S7)C8=C5C=C(C)S8)C9=C2N=C(C%10=CC(OCCCCCCCC)=CC=C%10)C(C%11=CC=CS(OCCOCCCCC)=C%11)ON9	21.8916
CC(S1)=CCNC1C2=CC=C(C(S3)PCC=C3C(S4)=CC(C4=C5OCC(CC)CCCC)=C(OCC(CCCC)CC)C6=P5C=C(C)S6)C7=C2N=C(C8=CC=C(OCCCCCCCC)C=C8)C(S9=CC=C(OCSCCSCCC)C=N9)=N7	21.8916
CP(S1)=CC2SC1C(OCC(CCCCCCCC)CCCCCC)=C(C=C(C3=C(CC(PC)CCCC)C=C(P4=CC=C(C5=CC(CC(CC)CCCC)=C(C)S5)C6=NSN=C64)S3)S7)C7=C2C8=CC=C(OCC(CC)CCCC)C=C8	21.8916
CCCCCCCCC1=CSC2=C1SC(C3=C4C(N(C(C4=C(N3)C5=CC6=C(C(CCCCCCCC)=C(S6)C7=CC8=C(C9=C(P(C%10=CC=C(S%10)C(CCCC)CC)=C8S7)C=CS9)C%11=CC=C(S%11)S(OCCC)CC)S5)=O)CC(CCCCCCCC)CCCCCC)=O)=C2	21.8916
NC(S1)=CC2=C1C(C3=CC=C(CC(CCCC)CC)S3)=C(C=C(C4=CC=C(C(N(CC(NSCCCC)CCCC)C5=O)=C6S5=C(C7=CC=C(C)[Se]7)N(CC(CCCCNC)CCCC)C6=O)[Se]4)S8)C8=C2C9=CC=C(CC(CC)CCCC)S9	21.8916
SC(S1)NCC2=C1P(OCC(CC)CCCC)=C(CSC(C3=C(OCCCCCCCCCCCC)C(C#N)=C(C4=C(C#N)C(OCCCCCCCCCCCP)=C(C)S4)S3)S5)C5=C2OCC(CC)CCCC	21.8748
CC(S1)=CC2=P1C(OCC(CCCO)CC)=C(S=S(C3=C4C(C(N(CCCCCCCCCCCC)C4=O)=O)=C(C)S3)S5)C5=C2OCC(CCCP)CC	21.8616
CC1=CC2=C(OCP(OPCC)CC)C3=C(C=C(C4=C(CCPCCCCOCCCC)C(C#N)=C(C5=C(C#N)C(COCCCCCCCCCC)=C(C)S5)S4)S3)C(OCC(CCCC)CC)SC2S1	21.8586
CC(S1)=CP2=C1C(OCC(CCCO)CC)=C(C=C(C3=C4C(C(N(CCCCCCPN)C4=O)=O)=C(C)N3)S5)C5=C2OCC(CCCC)CC	21.8546
CC1=CP2=C(C(C3=NC=C(CC(CC)CCCC)S3)=C(C=C(C4=CC=C(C5=C(C(N(CCCCOCSC)C6=O)=O)C6=C(C7=CC=C(C)S7)S5)S4)S8)C8=C2C9OCC=C(CC(CC)CCCC)S9)S1	21.8546
CC1=CP2=C(C(C3=NC=C(CC(CC)CCCC)S3)=C(C=C(C4=CC=C(C5=C(C(N(CCCCCCSC)C6=O)=O)C6=C(C7=CC=C(C)S7)S5)S4)S8)C8=C2C9OCC=C(CC(CC)CCCC)S9)S1	21.8546
CC(S1)=CC2SC1C(ONC(CCSCCCOC)CCCPCC)=C(C=C(C3=C4C(C(F)=C(C(OCC(CC)CCNC)=O)S4)=P(C)S3)S5)C5=C2C6=CC=CC=C6	21.8466
CCCCCCCCC1=CSC2=C1SC(C3=C4C(N(C(C4=C(N3)C5=CC6=C(C(CCCCCCCC)=C(S6)C7=CC8=C(C9=C(P(C%10=CC=C(S%10)C(CCCC)CC)=C8P7)C=CS9)C%11=CC=C(S%11)C(OCCC)CC)S5)=O)PC(CCCCCCCC)CCCCCC)=O)=C2	21.8466
CCCCCCCCC1=CSC2=C1SC(C3=C4C(N(C(C4=C(N3)C5=CC6=C(C(CCCCCCCC)=C(S6)C7=CC8=C(C9=C(P(C%10=CC=C(S%10)C(CCCC)CC)=C8P7)C=CS9)C%11=CC=C(S%11)C(OCCC)CC)S5)=O)PC(CCCCNCCC)CCCCCC)=O)=C2	21.8466
CC(O1)=CC2=C1C(C3=CC=C(CC(CCCC)CC)S3)=C(C=C(C4=CC=C(C5=CC=P(P6=CC=C(C)S6)C7=CN(CNCCCCCC)N=C75)S4)O8)C8=C2C9=CC=C(CC(CCCC)CC)S9	21.8096
CP1=CC2=C(OCC(CCCC)CC)C(S3)=C(C(OCC(CCCC)CC)=P2S1)C=C3C4=CC(S(N(CC(PCCCCC)CCCC)C5NO)=O)=C(S4)C6=C5C=C(C)S6	21.7896
CC1=CC2=C(C(OCC(CCCC)CC)CC(C=C(C3=CC(/C=C/C4=CC=S(C5=CC=C(C6=C7C(C(N6CC(CC)CCCC)=O)=C(C8=CC=CS8)N(CC(CC)CCCC)C7=O)S5)O4)=C(C)S3)S9)C9=C2SCC(CCCC)CC)S1	21.7876
CC1=CC2SC(OCC(CCCC)CC)C(S3)=C(C(OCC(CCCC)CC)=C2S1)C=C3C4=CC(S(N(CC(PCCCCC)CCCC)C5NO)=O)=C(S4)C6=C5C=C(C)S6	21.7826
CC(S1)=CC2CC1C(OCCCCCNCCCCCC)=C(C=C(C3=C4C(C(N(CC(C#CC#CC#CC#CP#C)CCCCCCCC)C4=O)=O)=C(C)S3)N5)C5=C2OCCCCCCCCCCCCO[HH]	21.7766
[HH]P[HH]	21.7766
CC1=CC2=C(C(OC[C@@H](CCNC)CC)=C(C=C(C3=C4C(SC(C(N5CCSCCCCC)=O)OC4C5=O)=C(C)S3)S6)P6PC2OCC(CC)CCCC)S1	21.6956
CP1=CC=C(C(N(OC(CCCC)CC)C2=O)=C(C2=C(C(S3)SCC=C3C(S4)=CC(C4SC5OCC(CC)CCCC)=C(OCC(CC)CCCC)C6=C5C=C(C)S6)N7CC(CN)CCCC)C7=O)S1	21.6836
CC1=CC=C(C2=PC=C(C3=SC=C(S4=CC(P(SC[C@H](CCCCCC)CCCC)=C(SC(C)=C5)C5=C6SCC(CCCCCC)CCCC)=C6S4)O3)C7=NN(CC(CCPCCC)CCCC)N=C27)O1	21.6216
CC(S1)=NC2=C1C(OCP(CCCC)CC)=C(CCC(C3=C4C(C(N(CC(CCCC)CC)C4=O)=N)=C(C)S3)S5)C5=P2NCC(CCCC)CC	21.621
CC1=CC2=C(OCN(CCCN)CC)C3=C(C=C(C4=C5C(C(C(C=C(CCCCCNCCC)C(OCCCCCCCC)=C6)=C6C5=O)=O)=C(C)S4)S3)C(OCC(CC)CCCC)CC2S1	21.5268
CC1=CC2=C(OCN(CCCC)CC)C3=C(C=C(C4=C5C(C(C(C=C(CCCCCNCCC)C(OCCCCCCCC)=C6)=C6C5=O)=O)=C(C)S4)S3)C(OCC(CC)CCCC)CC2S1	21.5268
CCCCCCCCC1=CSC2=C1SC(C3=C4C(N(C(C4=C(S3)C5=CC6=C(C(CCCCCCCC)=C(S6)C7=CC8=C(C9=C(C(C%10=CC(Cl)=C(S%10)CC(CCCP)CC)=C8S7)C=CS9)C%11=CC(Cl)=C(S%11)CC(CCCC)NC)S5)=O)CC(CCCCCCCN)CCCCCP)=O)=S2	21.5086
CC1=CC2=C(OCC(CCCC)CC)C3=C(C=C(C4=C(CCCOCCCCCCCC)P(C#N)=C(C5=C(C#N)C(CCPCSCCCCCCC)=C(C)S5)S4)S3)P(OCC(CCCC)CC)PC2S1	21.4296
CC1=CC2=C(C(CC[C@@H](NCCC)CC)SC(C=C(C3=C4C(SC(C(N5CCCCCCCC)=O)CC4C5=O)=C(C)S3)S6)C6=C2OCC(CC)CCCC)S1	21.4136
CC1=CC2=C(C(CC[C@@H](CCCC)CC)SC(C=C(C3=C4C(SC(C(N5CCCCCCOC)=O)CC4C5=O)=C(C)S3)S6)C6=C2OCC(CC)CCCC)S1	21.4136
CC1=CC2=C(C(CC[C@@H](CCCC)PC)SC(C=C(C3=C4C(SC(C(N5CCCCCCOC)=O)CC4C5=O)=C(C)S3)S6)C6=C2OCC(CC)CCCC)S1	21.4136
CC1=CC2=C(SCC(CCCC)CC)C3=P(C=C(C4=C(CCCCCCCCCCSC)C(C#N)=C(C5=C(C#N)C(COCCCCCCCCCC)=C(C)S5)S4)S3)C(OCC(CCCC)CC)=C2S1	21.3766
CC1=CC2=C(OCC(CCCC)CC)C3=C(C=C(C4=C(CCCOCCCCCCCC)P(C#N)=C(C5=C(C#N)C(CCPNSCCCCCCC)=C(C)S5)S4)S3)C(OCC(CCCC)CC)PC2S1	21.3506
CC1=CC2=C(OCC(CCCC)CC)C3=C(C=C(C4=C(CCCOCCCCCSCC)P(C#N)=C(C5=C(C#N)C(CCPCCCCCCCCC)=C(C)S5)S4)S3)C(OCC(CCCC)CC)PC2S1	21.3506
CC1=CC2=C(OCC(CNCC)CC)C3=C(C=C(C4=C(CCCOCCCCCSNC)P(C#N)=C(C5=C(C#N)C(CCPCCCCCCCCC)=C(C)S5)S4)S3)C(OCC(CCCC)OC)PC2S1	21.3506
CC1OCC2=C(OCC(CCCC)CC)C3=C(C=C(C4=C(CCCOCCCCCCCC)P(C#N)=C(C5=C(C#N)C(CCPCSCCCCCCC)=C(C)S5)S4)S3)C(OCC(CCCC)CC)PC2S1	21.3506
CC(S1)=CC2=C1C(OCC(CCSC)CC)CC(C=C(C3=C(CCCCCCCN)C=C(C4=C5C(C(N(CCCCCCCC)C5=O)NO)=C(C6=CC(CCCCCCCC)=C(C)S6)S4)S3)S7)C7=C2OCC(CCCC)CC	21.3226
O=C1N(C(CCCCCCCC)CCCCCCCC)C(C2=C(C)SC(C3=CC4=C(OC[C@@H](CC)CCSC)C(NC(C)=C5)=C5C(OCC(CC)CCCN)=C4P3)=C21)=O	21.1516
CC(S1)=CC2SC1C(ONC(CCSCCCOC)CCCPCC)=C(C=C(C3=C4C(C(F)=C(C(OCC(CC)CCNC)=O)S4)=P(C)S3)S5)C5=C2C6=CCOCC=C6	21.1348
CC1=CC2=C(C(C3=CC=C(OCCCCCCOC)C(OCCCCCCCC)=C3)=C(C=C(C4=CC=S(C5=C(OCCNCCCCC)C(OCCCCCCCO)=C(C6=CS=C(C)S6)C7=NSN=C57)S4)S8)C8=P2C9=CC(OCCCCCCCC)=C(CSCCCCCCC)C=C9)S1	21.0626
CC1=CC2=C(C(C3=CC=C(OCCCCCCOC)C(OCCCCCCCC)=C3)=C(C=C(C4=CC=S(C5=C(OCCNCCCCC)C(OCCCCCCCO)=C(C6=CS=C(C)S6)C7=NSN=C57)S4)S8)C8=P2C9=CC(OCCCCCCCC)=C(OSCCCCCCC)C=C9)S1	21.0626
CC1NCP2SC(C(OCC(CCCP)CC)=C(C=C(C)S3)C3PC2OCC(CCCC)CC)S1	20.3076
CC(S1)=CC2=C1C(C3=CC=C(OCC(CC)CCCC)S3)=C(C=C(C4=C5C(C(F)=C(C(C(CC)CCPC)=O)S5)=C(C)S4)S6)C6=C2C7=CC=C(OCC(CCCC)CC)S7	16.264
CC(S1)=CC2=C1C(C3=CC=C(CC(CCCC)CC)S3)=C(C=C(C4=C5C(SC(CCCCCC)=C5)=C(C6=C(C(N(CC(CC)CCCC)C7=O)=O)C7=C(C8=C9C(C=C(NCCCCC)S9)=C(C)S8)S6)S4)S%10)C%10=C2C%11=CC=C(CC(CC)CCCC)S%11	16.243
CC(S1)=CC2=C1C(C3=CC=C(CC(CCCC)CC)S3)=C(C=C(C4=C5C(SC(CCCCCC)=C5)=C(C6=C(C(N(CC(CC)CCCC)C7=O)PO)C7=C(C8=C9C(C=C(CCCCCC)S9)=C(C)S8)S6)S4)S%10)C%10=C2C%11=CC=C(CC(CC)CCCC)S%11	16.196
CC(S1)=CC2=C1C(C3=CC=C(SCCC(C)CCCC(C)C)S3)=C(C=C(C4=C5C(C(F)=C(C(OCC(CCCC)CC)=O)S5)=C(C)S4)S6)C6=C2C7=CC=C(SCCC(P)CCCC(C)C)S7	16.108
O=C(OCC(SC)CCCP)C1=CC2=C(C)SC(C3=CC4=C(C5=CC=C(CC(CCCC)CC)S5)C(SC(C)=C6)=C6C(C7=CC=C(CC(CC)CCCC)S7)=C4S3)=C2S1	15.904
O=C(OCC(SC)CCCC)C1=CC2=C(C)SC(C3=CC4=C(C5=CC=C(CC(CCCC)CC)S5)C(SC(C)=C6)=C6C(C7=CC=C(CC(CC)CCCC)S7)=C4S3)=C2S1	15.842
CC(S1)=CC2=C1C3=C(C(C4=CC(CCCCCCCCCC)=C(CCCCCCCCCC)S4)=C(C5=C(C=C(C6=C(CCCCCS)C=C(C7=CC(C8=NSN=C8C(C9=CC(CCCCCC)=C(C)S9)=C%10)=C%10C%11=CSN=C%117)S6)S5)S%12)C%12=C3C%13=CC(CCCCCCCCCC)=C(CCCCCCCCCC)S%13)S2	15.793
CC(S1)=CC2=C1C(C3=CC=C(SCCCCCCOC)S3)=C(C=C(C4=C5C(C(F)=C(C(OCS(CC)CCCC)=N)S5)=C(C)S4)S6)C6=C2C7=CC=C(SCOCCCPCC)S7	15.749
CC(S1)=CC2=C1C(C3=CC=C(SCCCCCCOC)S3)=C(C=C(C4=C5C(C(F)=C(C(OCS(CC)CCCC)=N)S5)=C(C)S4)S6)C6=C2C7=CC=C(SCCCCCPCC)S7	15.749
CC(S1)=CC2=C1C(C3=CC=C(SCCC(C)CCCC(C)C)S3)=C(C=C(C4=C5C(C(O)=C(C(OCC(CCCC)CC)=O)S5)=C(C)S4)S6)C6=C2C7=CC=C(SCCC(C)CCCC(O)C)S7	15.517
CC(S1)=CC2=C1C(C3=CC=C(CC(CCCC)CC)S3)=C(C=C(C4=C5C(SC(CCCCCC)=C5)=C(C6=C(C(N(CC(CC)CCCC)C7=O)=O)C7=C(C8=C9C(C=C(CCCCCC)C9)=C(C)S8)S6)S4)S%10)C%10=C2C%11=CC=C(CC(CC)CCCC)S%11	15.43
CC(S1)=CC2=C1C(C3=CC=C(OCC(NC)CCCC)S3)=C(C=C(C4=C5C(C(F)=C(C(CCC(CC)CCCC)=O)S5)=C(C)S4)S6)C6=C2C7=CC=C(OCC(CCCC)CC)S7	15.386
CC(S1)=CC2=C1C(C3=CC=C(OCC(CC)CCNC)S3)=C(C=C(C4=C5C(C(F)=C(C(OCC(CC)CCCO)=O)S5)=C(C)S4)S6)C6=C2C7=CC=C(OCC(CCCC)CC)S7	15.303
O=C(OCC(CC)CCCC)C1=CC2=C(C)SC(C3=CC4=C(C5=CC=C(CC(CCCC)SC)S5)C(SC(C)=C6)=C6C(C7=CC=C(CC(NC)NCCC)S7)=C4S3)=C2S1	15.2975
O=C(OCC(SC)CCCC)C1=CC2=C(C)SC(C3=CC4=C(C5=CC=C(CC(CCCC)CC)S5)C(SC(C)=C6)=C6C(C7=CC=C(CS(CC)CCCC)S7)=C4S3)=C2S1	15.2908
OOC(OCC(CC)CCCC)C1=CC2=C(C)SC(C3=CC4=C(C5=CC=C(CC(CCCC)SC)S5)C(SC(C)=C6)=C6C(C7=CC=C(CC(NC)NCCC)S7)=C4S3)=C2S1	15.1225
CC1=C2C(SC(C(OPC(CC)CCCC)=O)=C2F)=C(C3=CC4=C(C5=CP=C(CC(CCCC)CC)[Se]5)C6=C(C=C(C)S6)C(C7=CC=C(CC(CC)CCCC)[Se]7)=C4S3)S1	14.816
CC(S1)=CC2=C1C(C3=CC=C(OCC(NC)CCCC)S3)=C(C=C(C4=C5C(C(F)=C(C(OCC(CC)PCCC)=O)S5)=C(C)S4)S6)C6=C2C7=CC=C(OCC(CCCC)CC)S7	14.647
CC(S1)=CC2=C1C(C3=CCSC(CC(CCCCCOCC)CCCCCC)S3)=C(C=C(C4=CC=C(C5=CC(Cl)=C(C6=CC(SCCCCCCCCCCC)=C(O)S6)C7=NSN=C57)S4)S8)C8=C2C9=CC=C(CC(CCCCCCCC)CCCCCC)S9	14.6225
OC(S1)=CC2=C1C(C3=CC=C(SCCC(C)CCCC(C)C)S3)=C(C=C(C4=C5C(C(O)=C(C(OCC(CCCC)CC)=O)S5)=C(C)S4)S6)C6=C2C7=CC=C(SCCC(C)CCCC(O)C)S7	14.446
CC(S1)=CC2=C1C(C3=CC=C(OCC(CC)CCCC)S3)=C(C=C(C4=C5C(C(F)=C(C(OCC(CC)CCCC)=O)S5)=C(C)S4)S6)C6=C2C7=CC=C(OCC(NOCC)CN)S7	14.4178
CCCCCCCCC1=CSC2=C1SC(C3=C4C(N(C(C4=C(S3)C5=CC6=C(C(SCCCCCCC)=C(S6)C7=CC8=C(C9=C(C(C%10=CC(Cl)=C(S%10)CC(CCCC)CC)=C8S7)CNCS9)C%11=CC(Cl)=C(S%11)CC(CCCN)CC)S5)=O)CC(CCCCCCCC)CCCCCC)=O)=C2	14.297
CS(S1)=CC2=C1C(C3SCC=C(CC(CCCC)CCCCCC)S3)=C(C=C(C4=CC=C(C5=CC(Cl)=C(C6=CC(CC(CCCC)CC)=C(C)S6)C7=NPN=C57)S4)S8)C8=C2C9=CC=C(CC(CCCC)CCCCSC)S9	14.2272
CC(S1)=CC2=C1C(C3=CC=C(SCC(CC)CCCC)S3)=C(C=C(C4=C5C(C(S)=C(C(OCC(CC)SOCC)=O)S5)=C(C)S4)S6)C6=C2C7=CS=C(SCC(CCCC)CC)S7	14.122
CC(S1)=CC2=C1C(C3=CC=C(SCC(CC)CCCC)S3)=C(C=C(C4=C5C(C(S)=C(C(OCC(CC)SOCC)=O)S5)=C(C)S4)S6)C6=C2C7NCS=C(SCC(CCCC)CC)S7	14.059
CC1=CC2=C(C(C3=CC(CSCCCC)OC(C4=C(CCCOCC)C=C(CCCCCC)S4)S3)=C(C=C(C5=SC=C(C)C6=NSN=C56)S7)C7=C2C8=CC(CCCSCC)=C(C9=C(CCCCCC)C=C(CCCCCC)S9)S8)S1	14.048
CCOCCCCCCCC1=C(SC(C2=C3SC4=C(C3=C(C5=C2C6=C(S5)C=CS6)C7=CC(CCCCCCCCCC)SC(S7)CCCCCCOCCC)SC(C8=C(C=C(S8)C9=C(C(F)=CC%10=NSN=C%109)F)NC(CCCC)CC)=C4)=C1)CCCCCCCCCC	13.997
CC1=CC2=C(C(SCC(CCCC)CC)=C(CCN(S)N3)C3=C2SCC(CCSC)SC)P1	13.9752
CP1=CC=C(S1)S(S2)SCC3=C2C(OSC(OCCC)CC)=C(C=S(C)S4)C4=P3OCC(CCCN)CC	13.936
CC(S1)=CC2=C1C(C3=CC=C(SCC(CCCC)CO)S3)=C(C=C(C4=C5C(C(F)=C(C(OCC(CCCC)CC)=O)S5)=C(C)S4)S6)C6=C2C7=CCNC(SCC(CC)NCCC)S7	13.923
CC(S1)=CC2=C1C(C3=CC=C(SCC(CCCC)CO)S3)=C(C=C(C4=C5C(C(F)=C(C(OCC(CCCC)CC)=O)S5)=C(C)S4)S6)C6=C2C7=CCNC(SCC(CN)NCCC)S7	13.923
SC(S1)=CC2=C1C(C3=CC=C(SCC(OCCC)CC)S3)=C(C=C(C4=C5C(C(F)=C(C(OCC(CCCC)CC)=O)S5)=C(C)S4)S6)C6=C2C7=CC=C(SCC(CC)CCCC)S7	13.868
CC(S1)SCC2=C1C(OCC(CCCCCCCC)CCCCCC)=C(C=C(C3=C4C(C(F)=C(C(OCC(CC)CCCC)=O)S4)=C(C)S3)S5)C5=C2C6=CC=C(OPC(CC)CCCN)CSC6	13.8606
CC1=CC2=C(C(C3=CC=C(CP(SCCC)CC)S3)=C(C=C(C4PC(CCCCCCCC)C5=C(C=C(C6=C(C(N(CC(CCCCCCCC)CCCCCC)C7=O)=O)C7=C(C8=CC9=C(C(CCCCCCCC)=C(C)S9)S8)S6)S5)S4)S%10)C%10=C2C%11=PC=C(CC(CSCC)CC)S%11)S1	13.827
CC(S1)=CC2=C1C(OC[C@H](CCSCCCCCCC)CCCCCCCC)=C(C=C(C3=CC(SC(C4=C(OCCCCCOCC)C(OCCCCPCCC)=C(C5=CC(SC(C)=C6)=C6S5)C7=NON=C74)=C8)=C8S3)S9)C9=C2OC[C@H](CCCCCCCC)CCCCCCCCCC	13.807
O=C(OCC(CC)CCNC)C1NC(F)C2=C(C3=CC4=C(C(C5=CC(SC(CC(CC)CCCC)=C6)=C6S5)=C(C=C(C)S7)C7=C4C8=CC(SC(CC(CCCC)CC)=C9)=C9S8)S3)SC(C)SC2S1	13.807
CC(S1)=CC2=C1C(C3=CCSC(SCC(CC)CCCC)S3)=C(C=C(C4=C5C(C(F)=C(C(C(CC)NCCC)=O)S5)=C(C)S4)S6)C6=C2C7=CC=C(SCC(CCSC)CC)S7	13.775
CC1OCC2=C(C(C3=CC=C(/C=C/C4=CC=C(CC(CC)CCCC)S4)S3)=C(C=C(C5=CC=C(C6=C7C(C(N(CC(CCCCCCCCCC)CCCCCCCC)C7=O)=O)=C(C8=CC=C(C)S8)S6)S5)S9)C9=C2C%10=CC=C(/C=C/C%11NCC=C(CC(CCCC)OO)S%11)S%10)S1	13.71
CC1=CC2=C(C(C3=CC=C(CC(CC)CCCC)S3)=C(CCC(C4=CC=C(C5=C(C(N(CCCCCCCO)C6=O)=O)C6=C(C7=CC=C(C)S7)S5)S4)S8)C8=C2C9=CC=C(CC(CC)OCCC)S9)S1	13.668
CC(S1)=CC=C1C2=C(N=C(C3=CC(OCCCCCC)=CC=C3)C(C4=CC=CC(OCCCNCO)CC4)=N5)C5=C(C(S6)=CC=C6C(S7)=CC(C7=C8OCC(CC)CCCC)=C(OCC(CCCC)CC)C9=C8C=C(O)S9)C(F)=C2F	13.6
CC1=CC=C(C(S2)=C3C(C(C4=C(C[C@@H](CCCC)CC)SC(C[C@@H](CCCC)CC)=C4C3=O)=O)=C2C5=CC=C(C6=CC(C(C7=CC=C(CCCCCOSC)S7)=C(SC(C)=C8)C8=C9C%10=CC=P(CCCCCCCP)S%10)=C9S6)S5)S1	13.566
CC1=CC=C(C(S2)=C3C(C(C4=C(C[C@@H](CCCC)CC)SC(C[C@@H](CCCC)CC)=C4C3=O)=O)=C2C5=CC=C(C6=CC(C(C7=CC=C(CCCCCCSC)S7)=C(SC(C)=C8)C8=C9C%10=CC=P(CCCCCCCP)S%10)=C9S6)S5)S1	13.566
CC1=CC(SC2=C3C(C4=CC(CCCCCCCCCC)=C(CCCCCCOCCC)S4)=C5C(C(SC(C6NC(F)C=C(N)C7=NSN=P76)=C8)=C8S5)=C2C9=CC(CCCCCCCCCC)=C(CCCCCCCCCC)S9)=C3S1	13.56
CC(S1)=CC2=C1P(OCC(CCCCCCCC)CCOCCC)=C(C=C(C3=C(CC(CC)CCCC)C=C(C4=C(F)C(F)=C(C5=CC(CS(CC)CCCC)=C(C)S5)C6=NSN=C64)S3)S7)C7=C2C8=CCSC(OCC(CC)CCCC)C=C8	13.556
CC(S1)=CC2=C1P(OCC(CCCCCCCC)CCOCCC)=C(C=C(C3=C(CC(CC)CCCC)C=C(C4=C(F)C(F)=C(C5=CC(CC(CC)CCCC)=C(C)S5)C6=NSN=C64)S3)S7)C7=C2C8=CCSC(OCC(CC)CCCC)C=C8	13.556
CC1=CC(SC2=C3C(C4=CC(CSCCCCCCCC)=C(CCCCOCOCCC)S4)=C5C(C(SC(C6NC(F)C=C(N)C7=NSN=P76)=C8)=C8S5)=C2C9=CC(CCCCCCCCCC)=C(CCCCCCCCCC)S9)=C3S1	13.547
CC(S1)=CS2=C1C(OCC(CCCC)CC)=C(C=C(C3=C(CCCOCNCCCCCC)C=C(C4=CC(F)=C(C5=CC(SCCCCCCSCCCC)=C(C)S5)C6=NSN=C64)S3)S7)C7=C2OCC(CCCC)CC	13.527
CCCCCCCCC1=CSC2=C1SC(C3=C4C(N(C(C4=C(S3)C5=CC6=C(C(SCCCCCCC)=C(S6)C7=CC8NC(C9=C(C(C%10=CC(Cl)=C(S%10)CC(CCCC)CC)=C8S7)CNCS9)C%11=CC(Cl)=C(S%11)CC(CCCN)CC)S5)=O)CC(CCCCCCCC)CCCCCC)=O)=C2	13.52
CP1=CC=C(C2=CC3=C(C=C(C4=CC=C(C5=CC(C(C6=CC=C(SCC(CCCC)CCCCCC)S6)=C(SC(C)=C7)C7CC8C9=CC=C(SCC(CCCC)CCCCCC)S9)SC8S5)C4)C%10=C3N=C(C%11=CC=C(CCCCCCCC)S%11)C(C%12=CC=C(CCCCCCCC)S%12)=N%10)C%13=C2N=C(C%14=CC=C(CCCCCCCC)S%14)C(C%15=CC=C(CCCCCCCC)S%15)=N%13)S1	13.518
CC1=SC2=C(C(C3=CC=C(CP(SCCC)CC)S3)=C(C=C(C4PC(CCCCCCCC)C5=C(C=C(C6=C(C(N(CC(CCCCCCCC)CCCCCC)C7=O)=O)C7=C(C8=CC9=C(C(CCCCCCCC)=C(C)S9)S8)S6)S5)S4)S%10)C%10=C2C%11=PC=C(CC(CCCC)CC)S%11)S1	13.49
CC1=CC=C(C(S2)=C3C(C(C4=C(C[P@OH](CCCC)CC)SC(C[C@@H](CCPC)CC)=C4C3=P)=O)=C2C5=CC=C(C6=CC(C(C7=CC=C(SC[C@@H](CC)CCCC)S7)=C(SC(C)=C8)C8=C9C%10=CC=C(SCC(CCOC)OC)S%10)=C9S6)S5)P1	13.484
CC(S1)=CS2=C1C(NCC(CCCCCCCC)CCCCCC)=C(C=C(C3=C(CC(CC)CCCC)C=C(C4=C(F)C(F)=C(C5=CC(CC(CC)CCCP)=C(C)S5)C6=NSP=C64)S3)S7)C7=C2C8=CC=CC=C8	13.429
CC(S1)=CS2=C1C(NCC(CCCCCCCC)CCCCCC)=C(C=C(C3=C(CC(CC)CCCC)C=C(C4=C(F)C(F)=C(C5=CC(CC(CC)CCCC)=C(C)S5)C6=NSP=C64)S3)S7)C7=C2C8=CC=CC=C8	13.429
CC(S1)=CC=C1C2=CC(F)=C(C(S3)=CC=C3C(S4)=CC(C4=C5C6=CCSC(CC(CCCO)CC)S6)=C(C7=CC=C(CC(CC)CCCC)S7)C8=C5CNC(C)S8)C9=C2N=C(C%10=CC(OCCCCCCCC)=CC=C%10)C(C%11=CC=CC(OCCCCCCSC)=C%11)=N9	13.426
CC(S1)=CC=C1C2=CC(F)=C(C(S3)=CC=C3C(S4)=CC(C4=C5C6=CCSC(CC(CCCC)CC)S6)=C(C7=CC=C(CC(CC)CCCC)S7)C8=C5CNC(C)S8)C9=C2N=C(C%10=CC(OCCCCCCCC)=CC=C%10)C(C%11=CC=CC(OCCCCCCSC)=C%11)=N9	13.426
CC(S1)=CC=C1C2=CC(F)=C(C(S3)=CC=C3C(S4)=CC(C4=C5C6=CCSC(CC(CCCC)CC)S6)=C(C7=CC=C(CC(CC)CCCC)S7)C8=C5CNC(C)S8)C9=C2N=C(C%10=CC(OCCCCCCCC)=CC=C%10)C(C%11=CC=CC(OCCCCCCCC)=C%11)=N9	13.426
CC(S1)=CC=C1C2=CC(F)=C(C(S3)=CC=C3C(S4)=CC(C4=C5C6=CCSC(CC(CCCC)CC)S6)=C(C7=CC=C(CC(CC)CCCC)S7)C8=C5CNC(C)S8)C9=C2N=C(C%10=CC(OCCSCCCCC)=CC=C%10)C(C%11=CC=CC(OCCCCCCCC)=C%11)=N9	13.426
CC(S1)=CC2=C1C(C3=CCNC(SCC(CC)CCCC)S3)=C(C=C(C4=C5C(C(S)=C(C(OCC(CC)SOCC)=O)S5)=C(C)S4)S6)C6=C2C7=CS=C(SCC(CCCC)CC)S7	13.383
CC(S1)=CC2=C1C3=C(C(C4=CC(CCCCCCCCCC)=C(CCCCSCCCCC)S4)=C(C5=C(C=C(C6=C(CCCCCC)C=C(C7=CC(C8=NON=C8C(C9=CC(CCCCCC)=C(C)S9)=C%10)=C%10C%11=NSN=C%117)S6)S5)S%12)C%12=C3C%13=CC(CCCCCCCCCC)=C(CCCCCCCCCC)S%13)S2	13.369
CC(S1)=CC2=C1C3=C(C(C4=SC(CCCCCCCCCC)=C(CCCCCCCCCC)S4)=C(C5=C(C=C(C6=C(NCCCOC)C=C(C7=CC(C8=NSN=C8C(C9=CP(CCCCCC)=C(C)S9)=C%10)=C%10C%11=NSN=C%117)S6)S5)S%12)C%12=C3S%13=CC(CCCCCCCCCC)=C(CCCCCCCCNC)S%13)S2	13.322
CC(S1)=CC2=C1C3=C(C(C4=SC(CCCCCCCCCC)=C(CCCCNCCCCC)S4)=C(C5=C(C=C(C6=C(NCCCOC)C=C(C7=CC(C8=NSN=C8C(C9=CP(CCCCCC)=C(C)S9)=C%10)=C%10C%11=NSN=C%117)S6)S5)S%12)C%12=C3S%13=CC(CCCCCCCCCC)=C(CCCCCCCCCC)S%13)S2	13.322
CC(S1)=CC2=C1P(C3=CC=C(CC(CC)COCC)S3)=C(C=C(C4=C(CC(CC)CCCC)C=C(C5=C(F)C(F)=C(C6=CC(CC(CCCC)CC)=C(C)S6)C7=NSN=C75)S4)S8)C8=C2C9=CC=C(CC(CN)CSCC)S9	13.311
CC(S1)=CC2=C1C(C3=CC=C(CC(CCCC)CC)S3)=C(C=C(C4=C5C(C=C(CCCCCP)S5)=C(C6NC(C(N(CC(PC)CCCC)C7=O)=O)C7=C(C8=C9C(SC(CCCCCC)=C9)SC(C)S8)S6)S4)S%10)C%10=C2C%11=CC=C(CC(CC)CCCC)S%11	13.283
CC(S1)=CC2=C1C(OC[C@H](CCSCCCCCCC)CCCCCCCN)=C(C=C(C3=CC(SC(C4=C(OCOCCOCCC)C(OCCCSPCCC)=C(C5=CC(SC(C)=C6)=C6S5)C7=NON=C74)=C8)=C8S3)S9)C9=C2OC[C@H](CCCCCCCC)CCCCCCCCOC	13.278
OC1=CC=C(C(N(CC(CCCCCOCCCCCC)CCCCPCCCCC)C2=O)=C(C2=C(C(S3)=CC=C3C(P4)=CC(C4=C5)=CC6=C5C=C(C)S6)N7CC(CCCCCCCCCCCC)CCCCCCCCPC)C7=O)S1	13.243
CC(S1)=CC2=C1C(C3=CC=P(OCC(CC)CCCC)S3)=C(C=C(S4=C5C(C(F)=C(C(C(CC)CSCC)=O)S5)PC(C)S4)S6)C6=C2C7=CC=C(OCC(CCCC)CC)S7	13.232
CC(S1)=CC2=C1C(C3=CC=C(SCCSCCCCC)S3)=C(C=C(C4=C5C(C(F)=C(C(OCC(CC)CCCC)=O)S5)=C(C)S4)S6)C6=C2C7=CC=P(SCCCCCOCC)S7	13.215
CC(S1)OCC2=C1C(C3=CC=C(CC(CCCC)CC)C3)=C(C=C(C4=C5C(C(N(CCOCCCPO)C5=O)=O)=C(C)S4)S6)C6=C2C7=CC=C(CC(CC)NCCC)S7	13.209
CC1=CC2=C(C3=CP=C(CC(CC)OCCP)S3)C4=C(C=C(C5=CC=C(C(N(CC(CCCC)NC)C6=O)=C7C6=C(C8=CP=C(C)O8)N(CC(CC)CCCC)C7=O)P5)S4)C(C9=CC=C(CC(CCCC)CC)P9)=C2S1	13.207
CC(S1)=CC2OC1C(C3CCC=C(CC(CCCC)CC)S3)OC(C=C(C4=C(CC(CC)CCCC)C=C(C5=C(F)C(F)=C(C6=CC(CC(CCCC)CC)=C(C)S6)C7=NSS=C75)S4)S8)C8=C2C9=CC=C(CC(CCCC)CC)S9	13.178
CC(S1)=CC2=C1C3=C(C(C4=CC(CCCCCCCCCC)=C(CCCCCCCCCC)S4)=C(C5=C(C=C(C6=C(CCCCCC)C=C(C7=CC(C8=NOS=C8C(C9=CC(CCCCCC)=C(C)S9)=C%10)=C%10C%11=NSN=C%117)S6)S5)S%12)C%12=C3C%13=CC(CCCCCPCCCC)=C(CCCCCCCCCC)S%13)S2	13.166
CC1=CC2=C(C(C3=CCSC(CC(CC)CCCO)S3)=C(C=C(C4=PC=C(C5CC6C(C(N(CCOCCCCC)C6=O)=O)=C(C7=CC=C(C)S7)S5)S4)S8)C8=C2C9=CC=C(CC(CC)CCCC)S9)S1	13.164
CC1=CC2=C(C(C3=CC=C(CP(SCCC)CC)S3)=C(C=C(C4PC(CCCCCCCC)C5=C(C=C(C6=C(C(N(CC(CCCCCCCC)CCCCCC)C7=O)=O)C7=C(C8=CC9=C(C(CCCCCCCC)=C(C)S9)S8)S6)S5)S4)S%10)C%10=C2C%11=PC=C(CC(CCCC)CC)S%11)S1	13.164
CC1=CC2=C(C(C3=CCSC(CC(CC)CCCC)S3)=C(C=C(C4=PC=C(C5CC6C(C(N(CCOCCCCC)C6=O)=O)=C(C7=CC=C(C)S7)S5)S4)S8)C8=C2C9=CC=C(CC(CC)CCCC)S9)S1	13.164
CC(S1)=CC2=C1C(C3=CC=C(CCCCCC)S3)CC(C=C(C4=C(CC(CC)CCSC)C=C(C5=CC=C(C6=CC(CC(CCCC)CC)=C(C)S6)C7=NSN=C75)S4)S8)C8=C2C9=CC=C(OCCCCC)S9	13.158
CC1=CC=C(C2=PC=C(C3=CC=C(C4=CC(C(SC[C@H](CCCCCC)CCCC)=C(SC(C)PC5)C5=C6SCC(CCCCCC)CCCC)=C6S4)O3)C7=NN(CS(CCPCPC)CCCC)N=C27)O1	13.154
CC1=CC2=C(C(C3=CC=C(CCCCSC)S3)=C(CCC(C4=CC=C(C)C5=C4N=C(C6=CC=C(CCCCCC)S6)C(C7=CC=C(CCCCCC)S7)=N5)S8)C8=C2C9=CPCC(CCCCCC)S9)C1	13.149
CC1=CC2=C(C(C3=CC=C(CCCCCC)S3)=C(CCC(C4=CC=C(C)C5=C4N=C(C6=CC=C(CCCCCC)S6)C(C7=CC=C(CCCCCC)S7)=N5)S8)C8=C2C9=CPCC(CCCCCC)S9)C1	13.149
CC1=CC2=C(C(C3=CC=C(CCCCCN)S3)=C(CCC(C4=CC=C(C)C5=C4N=C(C6=CC=C(CCCCCC)S6)C(C7=CC=C(CCCCCC)S7)=N5)S8)C8=C2C9=CPCC(CCCCCC)S9)C1	13.149
OOC1N(C(CCCCCCCC)CSCCCCCC)C(C2=C(C)SC(C3=CC4NC(OC[C@@H](CC)CCCC)C(SP(C)=C5)=C5C(OCC(CS)NCCC)SC4S3)=C21)=O	13.142
OC1=CC=C(C(N(CC(CCCCCCCCCCCC)CCCCCCCCCC)C2=O)=C(C2=C(C(S3)=CC=C3C(P4)=CC(C4=C5)=CC6=C5C=C(C)S6)N7CC(CCCCCCCCCCCC)CCCCCNCCPC)C7=O)S1	13.133
CCCCCCCCCCC1=C(SC(C2=C3SC4=C(C3=C(C5=C2C6=C(S5)C=CS6)C7=CC(CCCCCCCCCC)=C(S7)CCCCCCCCCC)SC(C8=C(C=C(S8)C9=C(C(F)=CC%10=CSN=C%109)F)NC(CCCC)CO)=C4)=C1)CCCCCCCCCC	13.103
CC(S1)=CC=C1C2=CC(F)=C(C(S3)=CC=C3C(S4)=CC(C4=C5C6=CC(CCCCCCOC)=C(CCCCCCCC)S6)=C(C7=CC(CCCCCCCC)=C(CCCCCCCC)S7)C8=C5C=C(P)S8)C9=C2N=C(C%10=CC(OCCCCCCCC)=CC=C%10)C(C%11=CC=CC(OCCCOCCCC)=C%11)=N9	13.099
CC1=CC2=C(C(OC[C@@H](CCCC)NC)=C(C=C(C3=C4C(SC(C(N5CCCCNCCC)=O)=C4C5=O)=C(C)S3)O6)C6=C2OCC(CC)CCCC)S1	13.093
CC(S1)=CC2=C1C(C3=CC=C(SCCC(C)CCCC(C)C)S3)=C(C=C(C4=C5C(C(F)=C(C(OCC(CCCC)CC)=P)S5)=C(C)S4)S6)C6=C2C7=CC=C(SCCC(P)CCCC(C)C)S7	13.089
SC1=CC2=S(OCC(PC)CCCC)C(S3)CC(C(OCC(CC)CCCC)=C2S1)C=C3C4=CC5=C(/C(C(N5CC(CCCCCCCS)CCCCCC)=O)=C6C(N(CC(CCCCCC)CCCCCCCC)C7=CC(C)=CCSC7\6)PO)C=C4	13.079
CC1=CC2=C(C(C3=CC=C(OCCCCCCCC)C(OCCCCCCCC)=C3)=C(C=C(C4=CC=C(C5=C(OCCCCCCCC)S(OCCCCCCCC)=C(C6=CC=C(C)S6)C7=NSN=C57)S4)S8)C8=C2C9=CC(OCCCCCCCC)=C(OCNCCCOCO)C=C9)S1	13.078
NC(S1)=CS2=C1C(OCC(CCCCCCCC)CCCCCC)=C(C=C(C3=C(CC(CC)CCCC)C=C(C4=C(F)C(F)=C(C5=CC(CC(CC)CCCO)=C(C)S5)C6=NSN=C64)S3)S7)C7=C2C8=CC=CC=C8	13.07
CC(C1=C2N=C(C3=CC=C(ONCCCCCCC)C=C3)C(C4=CC=C(OCCCCCCNC)C=C4)=N1)=CC=C2C5=CC6=C(C(OCC(CCCC)CC)=C(C=C(C)S7)C7=C6PCC(CC)CNCC)S5	13.052
CC1=CC2=C(C(C3=CC=C(CC(CS)CCCC)S3)=C(C=C(C4=C(CC(SC)CCCC)C=C(C5=C(F)C(F)=C(C6=CC(CC(CCCC)CC)SC(C)S6)C7=NSNPC75)S4)S8)C8=C2C9=CC=C(CC(CC)CCCC)S9)S1	13.044
CC1=CC2=C(C(C3=CC=C(SCC(CCCC)CC)S3)=C(C=C(C4=C5C(C(N(CC(CC)CCCC)C5=O)=O)=C(C)S4)S6)C6=C2C7OCC=C(SCC(CCCC)CC)S7)S1	13.04
CC(S1)=CC=C1C2=CC(F)=C(C(S3)=CC=C3C(S4)=CC(C4=C5C6=CCSC(CC(CCCC)CC)S6)=C(C7=CC=C(CP(CC)CCCC)S7)C8=C5CNC(C)S8)C9=C2N=C(C%10=CC(OCCCCCCCC)=CC=C%10)C(C%11=CC=CC(OCCCCCCCC)=C%11)=N9	13.039
CC(S1)=CC2=C1C(C3=CC=C(OCC(CC)CCCC)S3)=C(COC(C4=C5C(C(O)=C(C(C(CC)CCNC)=O)S5)=C(C)S4)S6)C6=C2C7=CC=C(OCC(CCCC)CC)S7	13.034
CC1=CC=C(C(S2)=C3C(C(C4=C(C[C@@H](CCCC)CC)SC(C[C@@H](CCCC)CC)=C4C3NO)=O)=C2C5=CC=C(C6=CC(C(C7=CC=C(SC[C@@H](CC)CCSC)S7)=C(SC(C)=C8)C8=C9C%10=SC=C(SCC(CCCC)CC)S%10)=C9S6)S5)S1	13.033
CC1=CC=C(C(S2)=C3C(C(C4=C(C[C@@H](CCCC)CC)SC(C[C@@H](CCCC)CC)=C4C3NO)=O)=C2C5=CC=C(C6=CC(C(C7=CC=C(SC[C@@H](CC)CCCC)S7)=C(SC(C)=C8)C8=C9C%10=SC=C(SCC(CCCC)CP)S%10)=C9S6)S5)S1	13.033
CC(S1)=CC2=C1C3=C(C(C4=CC(CCCCCCCCCC)=C(CCCCCCCCCC)S4)=C(C5=C(C=C(C6=C(CCCCCC)C=C(C7=CC(C8NNSN=C8C(C9=CC(CCCCCC)=C(C)S9)=C%10)=C%10C%11=NSCNC%117)S6)S5)S%12)C%12=C3C%13=CC(CCCCCCCCCC)=C(OCCCCCCCCC)S%13)S2	13.023
CC1=CC2NC(C(C3=CC(C(CC(CCCC)OC)(CC(CC)CCCC)C4=C5C=CC=C4)=C5C=C3)=C(C=C(C6=CC=C(C7=C(F)C(F)=C(C8=CC=C(C)S8)C9=NSN=C97)S6)S%10)C%10SC2C%11=CC(C(CC(CCCC)CC)(CC(CCCC)CC)C%12=C%13C=CC=C%12)=C%13C=C%11)S1	13.007
CC1=CC2=C(C(C3=CP(CCCCCC)=C(C4CC(CCCCCC)C=C(CCCCCC)S4)S3)=C(C=C(C5=SC=C(C)C6=NSN=C56)S7)C7=C2C8=CC(CCCSCC)=C(C9=C(CCCCCC)C=C(OCCNCC)S9)S8)S1	13.002
CC(S1)=CC2=C1C(C3PPC=C(SCC(CC)CNCC)S3)=C(C=C(C4=C5C(C(F)=C(C(OCC(CC)CCCC)=O)S5)=C(C)S4)S6)C6=C2C7=CC=C(SCC(CCNC)CC)S7	12.984
CCCCCCC(SC1=SC2=C(C(C3=CC=C(S3)C4=CC5=C(C6=C(C(C7=CC(F)=C(S7)CC(CCCC)NC)=C5S4)C=CS6)C8=CC(F)=C(S8)CC(CCCC)CC)=C9C=C(SC9=C2S%10=CC=CS%10)CC(CCCCCC)CCCC)S1)CCCC	12.972
CC1=CC2=C(C(SCC(CCCC)CC)=C(CCN(C)N3)C3SC2SCC(CCSC)SC)S1	12.969
CC1SCC2=C(C(C3=CC=C(SCC(CCCC)CC)S3)=C(C=C(C4=CC=C(C5=C(F)C(F)=C(C6=CC=C(C)S6)C7=C5N=C(C8=CC=C(CC(CC)CCCC)S8)C(C9=CC=C(CC(NC)CCCC)S9)=N7)S4)S%10)C%10=C2C%11=SC=C(SCC(CC)CCCC)S%11)S1	12.964
CC(S1)=CC2=C1C(OC[C@H](CCCCCCCCCC)CCCCCCCC)=C(C=C(C3=CC(SC(C4=C(OCCCCCCCC)C(OCCCCCCNC)=C(C5=CC(SC(C)=C6)=C6S5)C7=NON=C74)=C8)=C8S3)S9)C9=C2OC[C@H](CCCCCCCC)CCCCCCNCCC	12.952
CC(P1)=CC2=C1C(C3=CC=C(SCCCCCCCC)S3)=C(C=C(C4=C5C(C(F)=C(C(OCC(COCC)CC)=O)S5)=C(C)S4)S6)C6=C2C7=CC=C(SCCCCSCSC)C7	12.9326
CC(S1)=CC2=C1C(OC[C@H](CCCCCCCCCC)CCCCCCCC)=C(C=C(C3=CC(SC(C4=C(OCCCCCCCC)C(OCCCCCCCC)=C(C5=CC(SC(C)=C6)=C6S5)C7=NON=C74)=C8)=C8S3)S9)C9=C2NC[C@H](CCCCPCCC)CCCCCCNCCC	12.911
CC(S1)=CC2=C1C(C3=CC=C(CC(CC)CCCC)S3)=C(C=C(C4OCC(SC(C5=C(OCC(CCCCCC)CCCC)C(OCC(CCCC)CCCCCC)=C(C6OCC7=C(S6)C=C(C)S7)C8=SSN=S85)=C9)=C9N4)S%10)C%10=C2C%11=CC=C(CC(CC)CCCC)S%11	12.908
CP(S1)=CC2=C1C(OCC(CCCCCCCC)CCCCCC)=C(C=C(C3=C(CC(CP)CCCC)C=C(P4=CC=C(C5=CC(CC(CC)CCCC)=C(C)S5)C6=SSN=C64)S3)S7)C7=C2C8=CC=C(OCC(CC)CCCC)C=C8	12.899
CC1=CC2OC(C(C3=CC=C(CC(CCCC)CC)[Se]3)=C(C=C(C4=CC=C(C5=C(OCCCCCCCC)C(OCCCCCCCC)=C(C6=CC=C(C)S6)C7=N[Se]N=C75)S4)S8)C8=S2C9=CC=C(CC(CC)CCCO)[Se]9)C1	12.897
CC(S1)=CC2=C1C(OC[C@H](CCSCCCCCNC)CCCCCCCC)=C(C=C(C3=CC(SC(C4=C(OCCCCCCCC)C(OCCCCPCCC)=C(C5=CC(SC(C)=C6)=C6S5)C7=NON=C74)=C8)=C8S3)S9)C9=C2OC[C@H](CCCCCCCC)CCCCCCCCCC	12.888
CC(S1)=CC2=C1C(OC[C@H](CCSCCCCCCC)CCCCCCCN)=C(C=C(C3=CC(SC(C4=C(OCCCCOCCC)C(OCCCSPCCC)=C(C5=CC(SC(C)=C6)=C6S5)C7=NON=C74)=C8)=C8S3)S9)C9=C2OC[C@H](CCCCCCCC)CCCCCCCCOC	12.888
O=C1N(C(CCCCCCCC)CSCCCCCC)C(C2=C(C)SC(C3=CC4NC(OC[C@@H](CC)CCCC)C(SP(C)=C5)=C5C(OCC(CS)NCCC)SC4S3)=C21)=O	12.88
O=C1N(C(CCCCSCCC)CSCCCCCC)C(C2=C(C)SC(C3=CC4NC(OC[C@@H](CC)CCCC)C(SP(C)=C5)=C5C(OCC(CS)NCCC)SC4S3)=C21)=O	12.88
CC1=CC2=P(C(OCC(CC)CNCC)=C(C=C(C3=CC(/C=C/C4=C(CC(CC)CCCC)C=C(C5=C(F)C(F)=C(C6=CC(C[C@@H](CPCC)CC)=CS6)C7=NSN=C75)S4)=C(C)P3)S8)C8=C2OCC(CC)PCCC)S1	12.879
CC1=CC2=P(C(OCC(CC)CNCC)=C(C=C(C3=CC(/C=C/C4=C(CC(CC)CCCC)C=C(C5=C(F)C(F)=C(C6=CC(C[C@@H](CCCC)CC)=CS6)C7=NSN=C75)S4)=C(C)P3)S8)C8=C2OCC(CC)PCCC)S1	12.879
CC1=CC2=C(C(SCC(CCCC)CC)=C(CCN(C)N3)C3=C2SCS(CCSC)SC)S1	12.8782
CC(S1)=CC2=C1C(C3=CCPC(CC(CCCCCCCC)CCCCCC)S3)=C(C=C(C4=CC=C(C5=CC(Cl)=C(C6=CC(CCOCCCCCCCCC)=C(C)S6)C7=CSN=C57)S4)S8)C8=C2C9=CC=C(CC(NOCCCCPC)CCCNCC)S9	12.8625
CC1=CC=C(C(C2=C3SC(C(OCC(CCCCCC)CCCC)CO)=C2)=C4C(C=C(C(OCC(CCCCCC)COCC)=O)S4)=C3C5=CC=C(C6=CC(C(OCC(CC)CCCC)=C(PC(C)=C7)C7=C8OCC(CCCC)CC)=C8S6)S5)S1	12.8554
O=C([C@@H](CC)CNCC)C1=CC2=C(C)SC(C3=CC4=C(C5PCC=C(CC(CCCC)CC)S5)C(SC(C)CC6)=C6C(C7=CC=C(CC(CC)CCCC)S7)=C4S3)=C2S1	12.8502
CC1=CC2=C(C(C3=CC=C(SCC(CCCC)CC)S3)=C(C=C(C4=CC=C(C5=C(F)C(F)=C(C6=CC=C(C)S6)C7=C5N=C(C8=CC=C(CC(CC)CCCC)S8)C(C9=CC=C(CC(CO)CCCC)S9)=N7)S4)S%10)C%10=C2C%11=CC=C(SCC(CC)CCCC)S%11)S1	12.8457
CC(S1)=CC2=C1C(OCC(CCCCSCPNCC)CCCPCCCC)=C(C=C(C3=CC=C(C4NCS=C(C5=CC=C(C)S5)C6NN[Se]N=C64)S3)S7)C7=C2SCC(CCCCCCCCCC)CCCCCCPC	12.844
CC(S1)=CC2=C1C(C3=CCPC(CC(CCCCCCCC)CCCCCC)S3)=C(C=C(C4=CC=C(C5=CC(Cl)=C(S6=CC(CCOCCCCCCCCC)=C(C)S6)C7=NSN=C57)S4)S8)C8=C2C9=CC=C(CC(COCCCCPC)CCCNCC)S9	12.8433
CC1=CC=C(C(S2)=C3C(C(C4=C(C[C@@H](CCCC)SC)SC(C[C@@H](CCCC)CC)=C4C3NO)=O)=C2C5=CC=C(C6=CC(C(C7=CC=C(SC[C@@H](CC)CCCC)S7)=C(SC(C)=C8)C8=C9C%10=SC=C(SCC(CCCC)CC)S%10)=C9S6)S5)S1	12.833
CC(S1)=CC2=C1C(C3=CC=C(SSCCCCCCC)S3)=C(C=C(C4=C5C(C(F)=C(C(OCC(CC)CCCC)=O)S5)=C(C)S4)S6)C6=C2C7=CCOC(SCCCCCCCC)S7	12.8325
CC(S1)=CC=C1C2=CC(F)=C(C(S3)=CC=C3C(S4)SCC(C4=C5S6=CC=C(CC(PCCC)CC)S6)=C(C7=CPSC(CC(CC)CCCC)S7)C8=C5S=C(C)S8)C9=C2N=C(C%10=CC=C(CCCCCCCC)S%10)C(C%11=CC=C(CCCCCCCC)S%11)=N9	12.829
CC1=CC2=C(C(C3=CC=C(SCC(CCCC)PC)S3)=C(C=C(C4=CC=C(C5=C(F)C(F)=C(C6=CC=C(C)S6)C7=C5N=C(C8=CC=C(CC(CC)CCCC)S8)C(C9=CC=C(CC(CC)CCCC)S9)=N7)S4)S%10)C%10=C2C%11=CC=C(SCC(CC)CCCC)S%11)S1	12.817
CC1=CC=C(C(S2)=C3C(C(C4=C(C[C@@H](CCCC)CC)SC(C[C@@H](CCCC)CC)=C4C3NO)=O)=C2C5=CC=C(C6=CC(C(C7=CC=C(SC[C@@H](CC)CCCC)S7)=C(SC(C)=C8)C8=C9C%10=SC=C(SCC(CCCC)CC)S%10)=C9S6)S5)S1	12.815
CC1=CC=C(C(S2)=C3C(C(C4=C(C[C@@H](CCCC)CC)SC(C[C@@H](CCCC)CC)=C4C3NO)=O)=C2C5=CC=C(C6=CC(C(C7=CC=C(SC[C@@H](CC)CCCC)S7)=C(SC(O)=C8)C8=C9C%10=SC=C(SCC(CCCC)CC)S%10)=C9S6)S5)S1	12.815
CC1=CC2=C(C(C3=CS=C(SCC(CCCC)CC)S3)=C(C=C(C4=C(CCCCCC)C=C(C5=C(F)C(F)=C(C6=CC(CCCCCC)=C(C)S6)C7=NSNOC75)S4)S8)C8=C2C9=CC=C(SCC(CCOC)CC)N9)S1	12.813
CC(S1)=CC2=C1C(C3=CC=C(SCCC(C)CCCC(C)C)S3)=C(C=C(C4=C5C(C(F)=C(C(OCC(CCCC)CC)=O)S5)=C(C)S4)S6)C6=C2C7=CC=C(SCCC(C)CCCC(N)C)C7	12.811
CC1=CC2=C(C(C3=CC=C(OCC(CCCCCC)PCCC)S3)=C(C=C(C4=C(CC(CC)CCCC)C=C(C5=C(F)C(F)=C(C6=CC(CC(CCCC)NS)=C(C)S6)C7=NSN=C75)S4)S8)C8CC2C9=CC=C(OCC(CCCC)CCCCCC)S9)S1	12.801
CCCCCCCCCCC1SC(SC(C2=C3SC4=C(C3=C(C5=C2C6=C(S5)C=CS6)C7=CC(CCCCCCCCCC)=C(S7)CNCCCCCCCC)SC(C8=C(C=C(S8)C9=C(C(F)=CC%10=NSNOC%109)F)CC(CCCC)CC)=C4)=C1)CCCPCCCCCC	12.795
CCCCCCCCCCC1SC(SC(C2=C3SC4=C(C3=C(C5=C2C6=C(S5)C=CS6)C7=CC(CCCCCCCCCC)=C(S7)CNCCCCCCCC)SC(C8=C(C=C(S8)C9=C(C(F)=CC%10=NSNOC%109)F)CC(CCCC)CC)=C4)=C1)CCCCCCCCCC	12.795
CC1=CC2=C(C(C3=CC=C(CC(CCCC)CC)[Ce]3)NC(C=C(C4=CC=C(C5=C(OCCCCCCCC)C(OCCCCCCCC)=C(C6=CC=C(S)S6)C7=N[Se]N=C75)S4)S8)C8=C2C9=CC=C(CC(CC)CCCC)[Se]9)S1	12.792
CC(S1)=CC2=C1C(C3NCC=C(CCCCCNCCCC)S3)=C(C=C(C4=C5C(C(N(CCCCPCCC)C5CO)SO)=C(C)S4)S6)C6=C2C7=CC=C(CCCCCCCCCC)S7	12.789
CC(S1)=CC2=C1C(C3=CC=C(SCCC(C)CCCC(C)C)S3)=C(C=C(C4=C5C(C(F)OC(C(OCC(CCCC)CO)=O)S5)=C(C)S4)S6)C6=C2C7=CC=C(SCCC(C)CCCC(O)C)S7	12.787
OC1=CC2=C(C(C3=C(F)C(F)=C(CC(CCCC)CC)S3)=C(C=C(C4=C(CCCCCCCC)C5=C(C=C(C6=C(C(N(CC(CCCCCCCC)CCCCCC)C7=O)=O)C7=C(C8=CC9=C(C(CCCCCCCC)=C(C)S9)S8)S6)N5)S4)S%10)C%10=C2C%11=C(F)C(F)=C(CC(CCCC)CC)S%11)S1	12.783
CC(S1)=CC2=C1C(C3=CCSC(CC(CCCC)CC)S3)=C(C=C(C4=C5C(SC(CCCCCC)=C5)=C(C6=C(C(N(CC(CC)CCCC)C7=O)=O)C7=C(C8=C9C(C=C(CCCCCC)S9)=C(C)S8)S6)S4)S%10)C%10=C2C%11=CC=C(CC(CC)CCCC)S%11	12.779
CC(S1)=CC2=C1C(C3=CC=C(CCCCCNCCCC)S3)=C(C=C(C4=C5C(C(N(CCCCPCCC)C5CO)=O)SC(C)S4)S6)C6=C2C7=CC=C(CCCCCCCCCC)S7	12.7695
CC1=CC2OC(C(C3=CC=C(CC(CCCC)CC)[Se]3)=C(C=C(C4=CC=C(C5=C(OCCCCCCCC)C(OCCCCCCCC)=C(C6=CC=C(C)S6)C7=N[Se]C=C75)S4)S8)C8=S2C9=CC=C(NC(CC)CCCC)[Se]9)C1	12.767
CC(S1)=CC2=C1C(C3PPC=C(SCC(CC)PNCC)S3)=C(C=C(C4=C5C(C(F)=C(C(OCC(CC)CCCC)=O)S5)=C(C)S4)S6)C6=C2C7=CC=C(SCC(CCCC)CC)S7	12.767
CC1=CC2=C(C(C3=PC(CCCCCC)=C(C4=C(CCCCCC)C=C(CCCCNC)S4)S3)=C(C=C(C5=C(F)C(F)=C(C)C6=NSNPC65)S7)C7SC2C8=CC(CCCCCC)=C(C9=C(CCCCCC)C=C(CCCCCC)S9)S8)S1	12.767
CC(S1)=CC2=C1C(C3SCC=C(CC(CCCC)CC)O3)=C(C=C(C4=CC=C(C(N(CC(CCCCCC)CSCC)C5=O)=C6C5=C(C7=CC=C(C)O7)N(CC(CCCCCC)CCCC)C6=O)O4)S8)C8=C2C9=CC=C(CC(CC)CCCC)S9	12.764
CC(S1)=CC2=C1C(C3=CCNC(OCC(CC)CCCC)S3)=C(C=C(C4=C5C(C(F)=C(C(OCC(PP)CCCS)=O)C5)=C(C)S4)S6)C6=C2C7=CC=C(OCC(PCCC)CC)S7	12.76
CC(S1)=CC2=C1C(C3=CCNC(OCC(CC)CCCC)S3)=C(C=C(C4=C5C(C(F)=C(C(OCC(CP)CCCC)=O)C5)=C(C)S4)S6)C6=C2C7=CC=C(OCC(PCCC)CC)S7	12.76
CC1=CC2=C(C(C3=CC(CCCCCC)=C(C4=C(CCCCCC)C=C(CCCCCC)S4)S3)=C(C=C(C5=CC=C(C6=CC=C(C7=CC=C(C)S7)C8CNSN=C86)S5)S9)C9=C2C%10=CC(PCCCCC)=C(C%11=C(CCCCCC)C=C(CCCCCC)C%11)S%10)S1	12.744
CC(S1)=CS2=C1C(OCC(CCCCCCCC)CCCCCC)=C(C=C(C3=C(CC(CC)CCCC)S=C(C4=C(F)C(F)=C(C5=CC(CC(CC)CNCC)=C(C)S5)C6=NCN=C64)S3)S7)C7=C2C8=CC=CC=C8	12.742
CC(S1)=CC2=C1C(C3PPC=C(SSC(CC)CNCC)S3)=C(C=C(C4=C5C(C(F)=C(C(OCC(CC)CCCC)=O)S5)=C(C)S4)S6)C6=C2C7=CC=C(SCC(CCCC)CC)S7	12.741
CC(S1)=CC=C1C2PC(N=C(C[C@@H](CCCC)CC)C(CC(CC)NSCC)=N3)C3NC(C(P4)=CC=C4C(S5)=CC(C5=C6OCCPCCCCCCCCC)=C(OCCCCCCCCCCCC)C7=C6CCC(C)S7)C8=NSN=C82	12.738
CC1=CC=C(C(N(CC(CCCCNC)CCCC)C2=O)=C(C2=C(C(S3)=CC=C3C(S4)=CC(C4=C5C6=CC=C(CC(PC)CCCC)S6)=C(C7=CC=C(CC(CC)CCCC)S7)C8=C5C=C(C)S8)N9CC(CCCC)CCCCCC)C9=O)S1	12.7347
O=C([C@@H](CC)CCCC)C1=CC2=C(C)SC(C3=CC4=C(C5=CC=C(CC(CCCC)CC)S5)C(SC(C)NC6)=C6C(C7=CC=C(CC(CC)CCCC)S7)=C4S3)=C2S1	12.733
CC(S1)=CC2=C1C(C3=CC=C(CC(CCCCCC)CCCCCCCC)S3)=C(C=C(C4=CC=C(C5=CC=C(C6=CC=C(C)S6)C7=NSNSC75)S4)S8)C8=C2C9=CC=C(CC(CCNCCC)CCCCCCCC)S9	12.7283
CC(S1)=CC2=C1C(C3=CC=C(CC(CNCC)CC)S3)=C(C=C(C4=CC=C(C(N(CC(CCCCCC)CCCC)C5=N)=C6C5=C(C7=CC=C(C)[Se]7)N(CC(CCCCCC)CCPC)C6=O)[Se]4)S8)C8=C2C9=CC=C(CC(CC)CCCC)S9	12.723
PC(S1)=CC2=C1C(C3OCC=C(NC(CCCCCCCC)CCCCCC)S3)=C(C=C(C4=CC=C(C5=CC(Cl)=C(C6=CC(CCPCCCCCCCCC)=C(C)S6)C7=NSNCC57)S4)S8)C8=C2C9=CC=C(CC(CCCCCCCC)CCCCCC)S9	12.717
CC1=CC=C(C(S2)=C3C(C(C4=C(C[C@@H](CCCC)CC)SC(C[C@@H](CCCC)CC)=C4C3=O)=O)=C2C5=CC=C(C6=CC(C(C7=CC=C(SC[S@@H](CC)CCCC)[Se]7)=C(SC(C)=C8)C8=C9C%10=CC=C(SCC(CCCC)CC)[Se]%10)=C9S6)S5)S1	12.716
CC1=CC2=C(C(C3=CC(CCCCCCCSCC)=C(CCCCCCCOCC)S3)=C(C=C(C4=CC=C(C5=CC=C(C6=CS=C(C)S6)C7=NSN=C75)C4)S8)C8=C2C9=CC(CCCNCCCCCC)=C(CCCCCCCCCC)S9)S1	12.715
CC1=CC2=C(C(C3=CC=C(CC(CCCC)CC)S3)=C(C=C(C4=CC=C(C5=C(OCCCCPCCC)C(OCCCCCCCS)=C(C6=CC=C(C)[Se]6)C7ONPN=C75)[Se]4)S8)C8=C2C9=CC=C(CC(CC)CCCC)S9)S1	12.714
CC1=CC2=C(C(C3=CC=C(CC(CCCC)CC)S3)=C(C=C(C4=CC=C(C5=C(OCCCCCCCC)C(OCCCCNCCS)=C(C6=CC=C(C)[Se]6)C7ONPN=C75)[Se]4)S8)C8=C2C9=CC=C(CC(CC)CCCC)S9)S1	12.714
CC(S1)=CC=C1C2=CC(F)=C(C(S3)=CC=C3C(S4)PCC(C4=C5C6=CCSC(CC(CCCC)CC)S6)=C(C7=CC=C(CC(CC)CCCC)S7)C8=C5CNC(C)S8)C9=C2N=C(C%10=CC(OCCCCCCCC)=CC=C%10)C(C%11=CC=CC(OCCCCCCCC)=C%11)=N9	12.71
CC1=CC2=C(C(C3=CC(CCCCCCCCCC)=C(CCCCCCCNCC)S3)=C(C=C(C4=CC=C(C5=CC=C(C6=CC=C(C)S6)C7=NSN=C75)S4)S8)C8OC2C9NCC(CCCCCCCCSC)=C(CCCCCCCCCC)S9)S1	12.7
O=C(OCC(CC)CCCC)C1=C(F)C2=C(C3=CC4=C(C(C5=CC(CC(CC(CC)CCCC)=C6)=S6S5)=C(C=C(C)S7)C7=C4C8=CC(SC(CC(CCCC)CC)=C9)=C9S8)S3)SC(C)=C2S1	12.697
CC1=CC(N(P[C@@H](CCCCCCCCCC)CCCCCCCC)C(C2=C3SC(C4=CC5=C(C(C6=CC=C(CC(CCCC)CC)S6)=C(C=C(S)S7)C7=C5C8=CC=C(C[C@@H](CCCC)CC)S8)S4)=C2)=O)=C3S1	12.696
CC(S1)=CC=C1C2=C(OCCCCCCCC)C(OCCCCCCCC)PC(C(S3)=CC=C3C(S4)=CC(C4=C5OCN(CCCC)CC)=C(OC[C@H](CC)CCSC)C6=P5C=C(C)S6)C7=C2N=C(C8=CC=C(OC)C=C8)C(C9=CC=C(OC)C=C9)=N7	12.695
CC(S1)=CC2=C1C(C3=CC=C(OCC(CC)CCCC)S3)=C(C=C(C4=C5C(C(F)=C(C(OCC(CC)CCCC)=O)S5)=C(C)P4)S6)C6=C2C7=CC=C(OCC(CCPC)CC)S7	12.695
CC1=CC=C(C(S2)=C3C(C(C4=C(C[C@@H](CCCC)CC)SC(C[C@@H](CCCC)CC)=C4C3NO)=O)=C2C5=CC=C(C6=CC(C(C7=CC=C(SS[C@@H](CC)CCCC)S7)=C(SC(C)=C8)C8=C9C%10=SC=C(SCC(CCCC)CC)S%10)=C9S6)S5)S1	12.693
CC1=CC=C(C(S2)=C3C(C(C4=C(C[C@OH](CCCC)CC)SC(C[C@@H](CCPC)CC)=C4C3=P)=O)=C2C5=CC=C(C6=CC(C(C7=CC=C(SC[C@@H](CC)CCCC)S7)=C(SC(C)=C8)C8=C9C%10=CC=C(SCC(CCOC)OC)S%10)=C9S6)S5)P1	12.689
CC(S1)=CC2=C1C(C3OCC=C(SCC(CC)CCCC)S3)=C(C=C(C4=C5C(C(F)NC(C(OCC(CC)CCCO)=O)S5)NC(C)S4)S6)C6=C2P7=PC=C(SCC(CCCC)CC)S7	12.688
CC1=CC=C(C(C2SC3SC(C(OCC(CCCCCC)CCCC)=O)=C2)=C4C(CNC(C(OCC(CCCCCC)CCCC)=O)S4)=C3C5=CC=C(C6=CC(C(OCC(CC)CCCC)=C(SC(C)=C7)C7=C8NCC(CCCC)CC)=C8S6)S5)S1	12.687
CC1=CC(C2=C/3C=CC(F)CS2)=C(C1)C3=C(C4=C5C=C(C6PCC7=C(OCCCCCCCCCCCCCCSCCCCC)C8=C(C=C(C)S8)C(OCCCCCCCCCCCCCCCCCCCC)SC7S6)S4)/C9SC5C=C(F)C=C9	12.674
CC1=CC2=C(C(C3=CC=C(CC(CC)CCCC)S3)NC(C=C(C4=CC=P(C5=C6C(C(N(CCCCCCCC)C6=O)=O)=C(C7=CC=C(C)S7)S5)S4)S8)P8=S2C9=CC=C(CC(CC)CCCC)S9)S1	12.659
CC(S1)=CC2=C1C3=C(C(OCC(CC)CCCC)=C(C4=C(C=C(C5=CC=C(/C(C(N6CC(CNCCCC)CCCCCCSC)=O)=C7C(C=CC(C)=C8)=C8N(CC(CCCCCC)CCNCCCCC)C/7=O)C6=C5)S4)S9)C9=C3OSC(CCCC)CC)S2	12.6577
CC1=CC2OC(C(C3=CC=C(CC(CCCC)CC)[Se]3)=C(C=C(C4=CC=C(C5=C(OCCCCCCCC)C(OCCCCCCCC)=C(C6=CC=C(C)S6)C7=N[Se]N=C75)S4)S8)C8=S2C9=CC=C(NC(CC)CCCC)[Se]9)C1	12.657
CC1=CC2=C(C3SCC(CCCCCCCSCC)=C(OCCCCCCCCC)S3)C(S4)=C(C(C5=CC(CCCCCCCCCC)=C(CCCCCCCCCC)S5)=C2S1)C=C4C6=CC=C(S6)C7=CC8=C(C=C(C9=CC=C(C)S9)C%10=NN(CCCCCCCC)NSC%108)C%11=NN(CCCCCCCC)NSC7%11	12.651
CC(C1)=CC2=C1C(C3=CC=C(OCC(CC)CCCC)S3)=C(C=C(C4=C5C(C(F)=C(C(OCC(CC)CCCC)=O)S5)=C(C)S4)S6)C6PC2C7=CC=C(OCC(CCCC)CC)S7	12.643
O=C([C@@H](CC)CNCC)C1=CC2=C(C)SC(C3=CC4=C(C5=CC=S(CC(CCPC)CC)S5)C(SC(C)=C6)PC6C(C7=CCSC(CC(CC)CCCC)S7)=C4S3)=C2S1	12.641
CC(S1)=CC2=C1C(OCC(CCPCCCPNCC)CCCPCCCC)=C(C=C(C3=CC=C(C4NCS=C(C5=CC=C(C)S5)C6NN[Se]N=C64)S3)S7)C7=C2SCC(CCCCCCCCCC)CCCCCCPC	12.636
CC(S1)=CC2=C1P(C3=CC=C(CC(CCCCNCCC)CCCCCC)S3)=C(C=C(C4=CC=C(C5=CC(Cl)=C(C6=CC(CC(CCCO)CC)=C(C)S6)C7=NSC=C57)S4)S8)C8=C2C9=CC=C(CC(CCCCCCNC)CCCCCC)S9	12.635
CC1=PC=C(C(S2)=C3C(C(C4=C(C[C@@H](CCCC)CC)SC(C[C@@H](CSCC)CC)=C4C3NO)=O)=C2C5=CC=C(C6=CC(C(C7=CC=C(SC[C@@H](CC)CCCC)S7)=C(SC(C)=C8)C8=C9C%10=SC=C(SCC(CCCC)CC)S%10)=C9S6)S5)S1	12.634
CC(P1)=CC2=C1C(C3=CC=C(CC(CCCCCC)CCCCCCCC)S3)=C(C=C(C4=CN=C(C5=CC=C(C6=CC=C(C)S6)C7=NSN=C75)S4)S8)C8=C2C9=CS=C(CP(CCCCSC)CCCCCCCC)S9	12.625
CC1=PC2=C(C(OCC(CCCCCCCCCC)CCCCCCCC)=C(C=C(C3=CC4=C(C(SC(C)=C5)=C5C6NNON=C64)S3)S7)C7=C2OCC(CCCOCCCCCC)CCCCPCCC)S1	12.62
CC1=PC2=C(C(OCC(CCCCCCCCCC)CCCCCCCC)=C(C=C(C3=CC4=C(C(SC(C)=C5)=C5C6NNON=C64)S3)S7)C7=C2OCC(CCCOCCCCCC)CCCCCCCC)S1	12.62
CC1=C2C(SC(C(OPC(CC)CSCC)=O)=C2N)=C(C3=CC4=C(C5=CC=C(CC(CCCC)CC)[Se]5)C6=C(C=C(C)S6)C(C7=CC=C(CC(CC)CCCC)[Se]7)=C4S3)S1	12.6174
CC1=C2C(SC(C(OPC(CC)CCCC)=O)=C2N)=C(C3=CC4=C(C5=CC=C(CC(CCCC)CC)[Se]5)C6=C(C=C(C)S6)C(C7=CC=C(CC(CC)CCCC)[Se]7)=C4S3)S1	12.6174
CC1=CC2=C(C(C3=CC(CCCCCCCCCC)=C(CCCCCCCNCC)S3)=C(C=C(C4=CC=C(C5=CC=C(C6=CC=C(C)S6)C7=NSN=C75)S4)S8)C8=C2C9NCC(CCCCCCCCSC)=C(OCCCCCCCCC)S9)S1	12.6135
CC1=CC(SC2=C3C(C4=CC(CSOCCOCCCC)=C(CCCCCCCCCC)S4)=C5C(C(SC(C6CCC=C(C)C7CNSC=C76)=C8)=C8S5)=C2C9=CC(CCCCOCCCCC)=C(CCCCCCCNNC)S9)=C3S1	12.611
CC(S1)=CC2=C1C(C3=CC=C(CC(CC)CCCC)S3)=C(C=C(C4=C(CC(CC)CCCC)C=C(C5=C(F)C(F)=C(C6PCC(CC(CCCC)CC)=C(C)S6)C7=NPN=C75)S4)C8)C8=C2C9OCCNC(CC(CC)CCCC)S9	12.609
CC1=CC=C(C(S2)=C3C(C(C4=C(C[C@@H](CCCC)CC)SC(C[C@@H](CCCC)CC)SC4C3=O)=N)=C2C5=CC=C(C6=CC(C(C7=CC=C(SC[C@@H](CC)CCCC)[Se]7)=C(SC(C)PC8)C8OC9C%10=CC=C(SCC(CCCC)CC)[Se]%10)=C9S6)S5)S1	12.606
CC(S1)=CC2=C1C(C3=CC=C(NN(CC)CCCC)S3)=C(C=C(C4=CC=C(C5=C(C(C6NC(CC(CC)CCCC)SC(CC(CC)CCCC)=C6C7=O)=O)C7=C(C8=CC=C(C)S8)S5)S4)S9)C9=C2C%10=CC=C(CC(CCCC)CC)S%10	12.603
CC1=CC2=C(OCC(CC)CCCC)C(S3)=C(C(OCC(CC)CCCC)=C2S1)C=C3C4SCC5=C(/C(C(N5CC(CCCCCCPC)CCCCCC)=O)=C6C(N(CC(CCCCNC)CCCCCCSN)C7=CC(C)=CC=C7\6)=O)C=C4	12.599
CC1=CC2=C(P(C3=CC=C(CC(CCCC)CC)S3)SC(C=C(C4=CC=C(C5=C(OCCCCCCCC)C(OCCCCCCCC)=C(C6=CC=C(C)[Se]6)C7=NSN=C75)[Se]4)S8)C8=C2C9=CC=C(CC(CC)CCCC)P9)S1	12.594
CC(S1)=CC2=C1C(C3=CC=C(CC(CCCC)CC)S3)=C(C=C(C4=C5C(SC(CCCCCC)=C5)=C(C6=C(C(N(CC(CC)CCCC)C7=O)=O)C7=C(C8=C9C(C=C(NCCCCC)S9)CC(C)S8)S6)S4)S%10)C%10=C2C%11=CC=C(CC(CC)CCCC)S%11	12.586
CC1=CC2=C(C(C3=CC=C(CP(SCCC)CC)S3)=C(C=C(C4=C(CCCCCCCC)C5=C(C=C(C6=C(C(N(CC(CCCCCCCC)CCCCCC)C7PO)=O)C7=C(C8=CC9=C(C(CCCCCCCC)=C(C)S9)S8)S6)S5)S4)S%10)C%10=C2C%11=PC=C(CC(CCCC)CC)S%11)S1	12.58
CC1=CC=C(C(P2)=C3C(C(C4=C(C[C@@H](CCCC)CC)[Se]C(C[C@@H](CCCC)CC)=C4C3=O)=O)=C2C5=CC=C(C6=CC(C(C7=CC=C(CCCCCCCC)S7)=C(SC(C)=P8)C8=C9C%10=CCSC(CCCCCPCC)S%10)=C9S6)S5)S1	12.572
CC(S1)=CC2=C1C3=C(C(OCC(CC)CCCC)=C(C4=C(C=C(C5=CC=C(/C(C(N6CC(CNCCCC)CCCCSCCC)=O)=C7C(C=CC(C)=C8)=C8N(CS(COCCCC)CCNCCCCC)C/7=O)C6=C5)S4)S9)C9=C3OSC(CCCC)CC)S2	12.569
CC1=CC=C(C(S2)=C3C(C(C4=C(C[C@@H](CCCC)CC)[Se]C(C[C@@H](CCCC)CC)=C4C3=O)=O)=C2C5=CC=C(C6=CC(C(C7=CC=C(CCCCCCCC)S7)=C(SC(C)=P8)C8=C9C%10=CCSC(CCCCCPCC)S%10)=C9S6)S5)S1	12.566
CC(S1)=CC2=C1C3=C(C(OCC(CC)CCCC)=C(C4=C(C=C(C5=CC=C(/C(C(N6CC(CNCCCC)CCCCSCCC)=O)=C7C(C=CC(C)=C8)=C8N(CS(CCCCCC)CCNCCCCC)C/7=O)C6=C5)S4)S9)C9=C3OSC(CCCC)CC)S2	12.5587
CC(S1)=CC2=C1C(C3=CC=C(CC(CCCC)CC)S3)=C(C=C(C4=C5C(SC(CCCCCC)=C5)=C(C6=C(C(N(CC(SC)CCCC)C7=O)=O)C7=C(C8=C9C(C=C(NCCCCC)S9)CC(C)S8)S6)S4)S%10)C%10=C2C%11=CC=C(CC(CC)CCCC)S%11	12.552
CC(S1)NCC2=C1C(C3=CCNC(CC(CCCC)CP)S3)=C(C=C(C4=C5C(SC(CCCCCC)=C5)=C(C6=C(C(N(CC(CC)CCCC)C7=O)=O)C7=C(C8=C9C(C=C(CCCCCC)S9)=C(C)S8)S6)S4)S%10)C%10=C2C%11=CC=C(PC(CC)PCCC)S%11	12.55
CC1=CC(N(O[C@@H](CCCCCCCCCC)CCCCOCCC)C(C2=C3SC(C4=CC5=C(C(OC[C@H](CC)CCCC)=C(CPC(C)S6)C6=C5OC[C@@H](CCCP)CC)S4)=C2)SO)=C3S1	12.543
CC(S1)=CC2=C1C(C3SCC=C(CC(CCCC)CCCCCC)S3)=C(CCC(C4=CC=C(C5=CC(Cl)=C(C6=CC(CC(CCCC)CC)=C(C)S6)C7=NPN=C57)S4)S8)C8=C2C9=CC=C(CC(CCCC)CCCCSC)S9	12.5396
CC1=CCNC(C(S2)=C3C(C(P4=C(C[C@@H](CPCC)CC)SC(C[C@@H](CCCC)CC)=C4C3=O)=O)=C2C5=CCOC(C6=CC(C(C7=CC=C(CCCCCCCC)S7)=C(SC(C)=C8)C8=C9C%10SCC=C(CNCCCCCC)S%10)=C9S6)S5)S1	12.533
CCCCCCCCCCC1=C(SC(C2=C3SC4=C(C3=C(C5=C2C6=C(S5)C=CS6)C7=CC(CCCCCCCCCC)=C(S7)CCCCCCSCCC)SC(C8=C(C=C(S8)C9=C(C(O)SCC%10=NSN=S%109)F)CC(CCCC)CC)=S4)=C1)CCCCCCCCCC	12.528
CC1=CC2=C(C(OCC(CC)CCCC)=C(C=C(C3=CC=C(N(C4=CCSC(C)C=C4)C5=CC=C(C6=PC=C(C7=CC=C(C8=CC=C(CCCCCCCC)S8)C9ONSN=C97)S6)C=S5)C=C3)S%10)C%10PC2OCC(CC)CCCC)S1	12.526
CC1=CC=C(C(N(CC(CCCCCC)CCCC)C2=O)=C(C2=C(C(P3)=CC=C3C(S4)=CC(C4=C5C6=CCSC(CC(CC)CCCC)S6)=C(C7=CC=C(CC(CC)CCCC)S7)C8=C5C=C(C)S8)N9CC(CCCC)CCCCCC)C9=O)S1	12.523
CC(S1)=CC2=C1C(C3=CC=C(PCC(SC)CCCC)S3)=C(C=C(C4=C5C(C(F)=C(C(ONC(CC)CCCC)=O)O5)=C(C)S4)S6)C6=C2C7=CC=C(OCC(CCCO)CC)S7	12.523
O=C([C@OH](CC)CCPC)C1=CC2=C(C)SC(C3=CC4=C(C5=CC=C(CC(CCCC)CC)S5)C(SC(C)CC6)=C6C(C7=CC=C(CC(CC)SCCC)S7)=C4S3)=C2S1	12.51
CC(S1)=CC=C1C2=C(F)C(F)=C(C(S3)=CC=C3C(S4)=CC(C4=C5C6=CC=C(OC[C@H](CCCC)CC)C=C6)=C(C7=CC=C(OCC(CP)CCCC)C=C7)C8=C5C=C(C)S8)C9=C2N=C(C(S%10)=CC=C%10C[C@@H](CP)CCCC)C(C%11=CC=C(S%11)CC(CN)CCCC)=N9	12.508
CC(S1)=CC=C1C2=CC(F)=C(C(S3)=CC=C3C(S4)SCC(C4=C5S6=CC=C(CC(PCCC)CC)S6)=C(C7=CP=C(CC(CC)CCCC)S7)C8=C5S=C(C)S8)C9=C2N=C(C%10=CS=C(CCCCCCCC)S%10)C(C%11=CC=C(CCCCCCCC)S%11)=N9	12.507
CC(S1)=CC2=C1C(OC[C@H](CCSCCCCCCC)CCCCCCCN)=C(C=C(C3=CC(SC(C4=C(OCCCCCCCC)C(OCCCCPCCC)=C(C5=CC(SC(C)OC6)=C6S5)C7=NON=C74)=C8)=C8S3)S9)C9=C2OC[C@H](CCCCCCCC)CCCCCCCCCC	12.506
CC1=C2C(SC(C(OPC(CC)CCCS)=O)=C2N)=C(C3=CC4=C(C5=CC=C(CC(CCCC)CC)[Se]5)C6=C(C=C(C)S6)C(C7=CC=C(CC(CC)CCCC)[Se]7)=C4S3)S1	12.5
CC1=C2C(SC(C(OPC(CC)CCCS)=O)=C2N)=C(C3=CC4=C(C5=CC=C(CC(CCCC)CC)[Se]5)C6=C(C=C(C)S6)C(C7=CC=C(CC(CC)CCCO)[Se]7)=C4S3)S1	12.5
CC1=CC(SC2=C3C(C4=CC(CPCCCOCCCC)=C(CCCCCCCCCC)S4)=C5C(C(SC(C6CCC=C(C)C7=NSC=C76)=C8)=C8S5)=C2C9=CC(CCCCOCCCCC)=C(CCCCCCCNNC)S9)=C3S1	12.4975
CC1=CC=S(C2=C(C(N(CC(CC)CCCC)C3CO)=O)C3=C(C4=CC=C(C5=SC(C(C6=CC=S(CC(CCCC)CN)S6)=C(SC(C)=C7)C7=C8C9=CC=C(CC(CCCC)CC)S9)=C8S5)S4)C=C2)S1	12.49
CC1=CC=C(C2=C(C(N(CC(CC)CCPC)C3=O)=O)C3=C(C4=PS=C(C5=CC(C(OCSCCCCCCCCCC)PC(SC(C)=C6)C6=C7OCCCSCCCCCCCC)=C7S5)S4)C=C2)S1	12.488
CC(S1)=CC2=C1C3=C(C(OCC(CC)CCCC)=C(C4=C(C=C(C5=CC=C(/C(C(N6CC(CNCCCC)CCCCSCCC)=O)=C7S(C=CC(C)=C8)=C8N(CS(CCCCCC)CCNCCCCC)C/7=O)C6=C5)S4)S9)C9=C3OSC(CCCC)CC)S2	12.488
CC(S1)=CC2=C1C(OC[C@H](CCSNCCCCCC)CCCCCCCC)=C(C=C(C3=CC(SC(C4=C(OCCCCCCCC)C(OCCCCPCCC)=C(C5=CC(SC(C)=C6)=C6S5)C7=NON=C74)=C8)=C8S3)S9)C9=C2OC[C@H](CCCCCCCC)CCCCCPCCCC	12.486
OC(S1)=CC2=C1C(C3=CC=C(CC(CCCC)CC)S3)=C(C=C(C4=C5C(C(N(CCCCSNCC)P5=O)=O)NC(C)S4)S6)C6CC2C7=CC=C(NC(CC)SCCC)S7	12.486
CC1=CC2=C(C(OCC(CC)CCCC)=C(C=C(C3=CC=C(N(C4=CC=C(N)C=C4)C5=CC=C(C6PCC=C(C7=SC=C(C8=CC=C(CCCCCCCC)N8)C9ONSN=C97)S6)C=C5)C=C3)S%10)C%10=C2OCC(CO)CCCC)S1	12.486
CC(S1)=CC2=C1C(OC[C@H](CCSCCCCCCC)CCCCCCCN)=C(C=C(C3=CC(SC(C4=C(OCCCCCCCC)C(OCCCCPCCC)=C(C5=CC(SC(C)=C6)=C6S5)C7=NON=C74)=C8)=C8S3)S9)C9=C2OC[C@H](CCCCCCCC)CCCCCCCCCC	12.485
CC(P1)=CC2=C1C(C3=CC=C(SCCCCCCCC)S3)=C(C=C(C4=C5C(C(F)=C(C(OCC(COCC)CC)=O)S5)=C(C)S4)S6)C6=C2C7=CC=C(SCCCCSCCC)C7	12.4806
CC(S1)=CC2CC1C(C3=CC=C(CCCCCCCSCC)S3)NC(C=C(C4=C5C(C(N(CCCCCCCC)C5CO)=O)=C(C)S4)S6)C6=C2C7=CC=C(CCCCCCCPCC)S7	12.477
CC1=CC2=C(OCC(CC)CCCC)C(S3)=C(C(OCC(CC)CCCC)=C2S1)C=C3C4SCC5=C(/C(C(N5CC(CNCCCCPC)CCCCCC)=O)=C6C(N(CC(CCCCNC)CCCCCCCN)C7=CC(C)=CC=C7\6)=O)C=C4	12.475
CC(S1)=CC2=C1C(C3CCC=C(SCCC(C)CCCC(C)C)S3)=C(C=C(C4NC5C(C(F)=C(C(OCC(CCCC)CC)=O)S5)=C(C)S4)S6)C6=C2C7=CC=C(SCCC(C)CCCC(O)C)S7	12.475
CC1=CC=C(C(S2)=C3C(C(C4=C(C[C@@H](CCCC)CC)CC(C[C@@H](CCCC)CN)=C4C3=O)=O)=C2C5=CC=C(C6=CC(C(C7=CC=C(SC[C@@H](CC)CCNC)[Se]7)=C(SS(C)=N8)C8=C9C%10=CC=C(SCP(PCCC)CC)[Se]%10)=C9S6)S5)S1	12.465
O=C([C@@H](CC)CCCC)C1=CC2=P(C)SC(C3=CC4=C(C5=CC=S(CC(SCCC)CS)S5)C(SC(C)=S6)=C6C(C7=CC=C(CC(NC)CCCC)S7)=C4S3)=C2S1	12.4593
CC(S1)=CC2=C1C(C3=CC=C(CC(CCCC)SCNCCC)S3)=C(C=C(C4=CC=C(C5=PC(Cl)=C(C6=CC(CCCCCCCCSCCC)=C(C)S6)C7=NSN=C57)S4)S8)C8=C2C9=CC=C(CC(CCCC)CCCPCC)S9	12.458
CC(S1)=CC2=C1C(OCC(CCCC)CC)OC(C=C(C3=C(CCCCCCCCCCCC)C=C(C4PCC(F)=C(C5=CC(CCCOCCCCCNCC)=C(C)S5)C6SNSN=C64)S3)S7)C7=C2OCC(OCCC)SC	12.456
CC(S1)=CC2=C1S(C3=CC=C(OCC(CC)CCCC)S3)=C(C=C(C4=C5C(S(F)=C(C(OCC(OC)CCCC)=O)S5)=C(C)S4)S6)C6=C2C7=CC=C(OCC(CCCC)CC)S7	12.443
OOC1N(CCCCPCCC)C(C2=C(C)SC(C(S3)=CC4=C3C(C5CCC=C(CC(CC)CCCC)S5)=C6C(SC(C)=C6)=C4C7=CC=C(C[C@H](CNCC)CC)S7)OC21)OO	12.429
CC(S1)=CS2=C1C(OCC(CCCCCCCC)CCCCCC)=C(C=C(C3=C(CC(CC)CCCC)S=C(C4=C(F)C(F)=C(C5=CC(CC(CC)CCCC)=C(C)S5)C6=NSN=C64)S3)S7)C7OC2C8=CC=CC=C8	12.428
CC1=CC=C(C(S2)=C3C(C(C4=C(C[C@@H](CCCP)CC)[Se]C(C[C@@H](CCCC)CC)=C4C3=O)=O)=C2C5=CC=C(C6=CC(C(C7=CC=C(CCCCCSCC)S7)=C(SC(C)=C8)C8=C9C%10=CCSC(CCCCCCCC)S%10)=C9S6)S5)S1	12.427
CC1=CC=C(C(S2)=C3C(C(C4=C(C[C@@H](CCCC)CC)[Se]C(C[C@@H](CCPC)CC)=C4C3=O)=O)=C2C5=CC=C(C6=CC(C(C7=CC=C(CCCCCCCC)S7)=C(SC(C)=C8)C8=C9C%10=CCSC(CCCCCPCC)S%10)=C9S6)S5)S1	12.427
CC1=CC=C(C(S2)=C3C(C(C4=C(C[C@@H](CCCC)CC)[Se]C(C[C@@H](CCCC)CC)=C4C3=O)=O)=C2C5=CC=C(C6=CC(C(C7=CC=C(CCCCCCCC)S7)=C(SC(C)=C8)C8=C9C%10=CCSC(CCCCCPCC)S%10)=C9S6)S5)S1	12.427
CC1=CC=C(C(S2)CC3C(C(C4=C(C[C@@H](CCCC)CC)SC(C[C@@H](CCCC)CO)SC4C3=O)=O)=C2C5=CC=C(C6=CC(C(C7=CS=C(SC[C@@H](CC)CCCC)[Se]7)=C(SC(C)PC8)C8=C9C%10=CC=C(SCC(CCCC)CC)[Se]%10)=C9S6)S5)S1	12.425
CC(S1)=CC2=C1C(C3=CC=C(CC(CCCCCC)PP)S3)=C(C=C(C4=CC=C(C5=CCNC(C6=CC=C(C)S6)C7=NSN=C75)S4)S8)C8=C2C9CCC=C(CC(CCCCCC)CC)C9	12.424
CCCCC(CC1=CC=C(S1)C2OC3C=S(SC3PC(C4OC2SC=C4)C5=CC=C(S5)CC(CCCC)CC)C6=C(C(Cl)=CS6)Cl)CC	12.423
CC(S1)=CCNC1C2=CC=C(C(S3)=CC=C3C(S4)=CC(C4=C5NCC(CC)CCSC)=C(OCC(CCCC)CC)C6CP5C=C(C)S6)C7=C2N=C(C8=CC=C(OCCCCCCCC)C=C8)C(C9=CC=C(OCCCCCCCC)C=C9)=N7	12.421
CC(S1)=CC2PC1C(OC[C@@H](CCCCCCCCCC)SCCCCCCC)=C(CPC(C3=C(CCCCCP)C(SC(C4=CC=C(C5=CC(SS(C)=C6CCCCCC)=C6S5)C7=NSN=C74)=C8)=C8S3)S9)C9NC2OC[C@H](CCCCCCCC)CCCCCCCCCC	12.419
CC1=CC=C(C2=C(C(N(CC(CC)CCCC)C3=O)=O)C3=C(C4=CC=C(C5=SC(C(C6=CC=S(CC(CCCC)ON)S6)=C(SC(C)=C7)C7=C8C9=CC=C(CC(CCCC)CC)S9)=C8S5)S4)C=C2)S1	12.418
CC1=CC2=C(C(C3=CC=C(CC(CC)CCCC)S3)=C(C=C(C4=CC5=C(CNC(C6=C(C(N(CCCCCCCC)C7=O)=O)C7=C(C8=CC9=C(CCC(C)N9)S8)S6)S5)S4)N%10)C%10=C2C%11=PC=C(CC(CC)CCCC)S%11)S1	12.416
CC1=CC2=C(C(C3OCC=C(C[C@@H](CCCC)CCCCCC)S3)=C(C=C(C4=C(CC(CC)CCCC)C=C(C5=C(F)C(F)=C(C6=CC(CC(CCCC)CC)=C(C)S6)C7=NSN=C75)S4)S8)C8=C2C9=SP=C(CC(CCCCCC)CCCC)S9)S1	12.415
CC1=PC=C(C(N(CC(CCNCCCNSCCCC)CPCCCCOCCC)C2=O)=C(C2=C(C(S3)=PC=C3C(S4)=CC(C4=C5)=CC6=C5C=C(C)S6)N7CC(CCCCCCCCCCCC)CCCCCCCCCC)C7=O)S1	12.413
CC1SCC2=C(C(C3=CC=C(SCC(CCCC)CC)S3)=C(C=C(C4=CC=C(C5=C(F)C(F)=C(C6=CC=C(C)S6)C7=C5N=C(P8=CC=C(CC(CC)CCCC)S8)C(C9=CC=C(CC(CC)CCCC)S9)=N7)S4)S%10)C%10=C2C%11=SC=C(SCC(CC)CCCC)S%11)S1	12.412
CC(S1)=CC2=C1C(C3=CC=C(OSC(PCCC)CC)C=C3)=C(C=C(C4=CC=C(C5=C(OCCCCCCCC)C(OCCCCCCPC)=C(C6=CC=P(C)S6)C7NNON=C75)S4)S8)C8=C2C9=SC=C(OCC(CC)SCCC)C=C9	12.411
CC(S1)=CC=C1C2PC(N=C(C[C@@H](CCCC)CC)C(CC(CC)NCCC)=N3)C3NC(C(P4)=CC=C4C(S5)=CC(C5=C6OCCPCCCCCCCCC)=C(OCCCCCCCCCCCC)C7=C6CCC(C)S7)C8=NSN=C82	12.411
O=C(N1CC(CCCCOCCC)CCCCCC)/C(C2=C1C=C(C)C=C2)=C3C(N(CC(CCCCCC)CCCCCCCC)C4=CC(C5=CC(C)PC(C6=CC7=C(CCC(CCCC)CCCSCC)C8=C(C=C(C9=C(C)C=C(C)S9)S8)C(CCC(CCOC)SCCCCC)=C7S6)P5)=CC=C4/3)=O	12.4055
O=C(N1CC(CCCCOCCC)CCCCCC)/C(C2=C1C=C(C)C=C2)=C3C(N(CC(CCCCCC)CCCCCCCC)C4=CC(C5=CC(C)PC(C6=CC7=C(CCC(CCCC)CCCSCC)C8=C(C=C(C9=C(C)C=C(C)S9)S8)C(CCC(CCCC)SCCCCC)=C7S6)P5)=CC=C4/3)=O	12.4055
CC(S1)=CC=C1C2=C(P)C(F)=C(C(S3)=CC=C3C(S4)=CC(C4=C5C6=CC=C(C[C@H](CCCO)CC)S6)PC(C7=PC=C(CC(CC)CCCC)C7)C8=C5C=C(C)S8)C9=C2N=C(C(S%10)=CC=C%10C[C@@H](NC)CCCC)C(C%11=CC=C(S%11)CC(CC)CCCC)=N9	12.402
CC(S1)=CC2=C1C(C3=CC=C(SCCC(C)CSCC(C)C)S3)=C(C=C(C4=C5C(C(F)OC(C(OCC(CCCC)CO)=O)S5)=C(C)S4)S6)C6=C2C7=CC=C(SCCC(C)CCCC(O)C)S7	12.401
CC1=CC=C(C(N(CC(CCCCCC)CCCC)S2=O)=C(C2=C(C(S3)=CC=C3C(S4)=CC(C4=C5OCCCCCCCCCCCC)=C(OCCCCCCCCCPPC)C6=C5C=C(S)S6)N7CC(CCCC)CCCCCC)C7=O)S1	12.394
CC(S1)=CC2=C1C(S3=CC=C(CC(CCCC)CC)S3)=C(C=C(C4=CCPC(C(N(CC(CCCCCC)NCCC)C5PN)=C6C5=C(C7=CC=C(C)[Se]7)N(CC(CCCCCC)CCCC)C6=O)[Se]4)S8)C8=C2C9=CC=C(CC(CC)CCCC)S9	12.393
CC(S1)=CC2SC1C(C3=CC=C(OCC(CC)CCCC)S3)=C(COC(C4=S5C(C(F)=C(C(OCC(CC)CNCC)=O)S5)=C(C)C4)S6)C6=C2C7=CC=C(OCC(CCCC)CC)S7	12.391
CC(S1)=CC2SC1C(C3=CC=C(OCC(CC)CCCC)S3)=C(COC(C4=S5C(C(F)=C(C(OCC(CC)CNCC)=O)S5)=C(C)C4)S6)C6=C2C7=CC=C(OCC(CCCC)CO)S7	12.391
CC(S1)=CC2=C1C(C3=CC=C(OCC(SC)COCC)S3)=C(C=C(C4=C5C(C(F)=C(C(SCC(CC)CCCC)=O)S5)=C(C)S4)S6)C6=C2C7=CCCC(OCC(CCCC)CC)S7	12.39
CC(S1)=CC=C1C2=C(N=C(C3=CC(OCCCCCC)=CCSC3)C(C4=CC=CS(OCCCCCC)NC4)=S5)C5=C(C(S6)=CC=C6C(S7)=CP(C7=C8OCC(CC)CCCC)=C(OCC(CCCC)CC)C9=C8C=C(C)S9)C(F)=C2F	12.389
CC(S1)=PC2=C1C(C3=CCSC(OCC(CC)CCCC)P3)=C(C=C(C4=C5C(C(F)=C(C(OCC(CC)CCCC)=O)S5)=C(C)S4)N6)C6=C2C7=CC=C(OCC(CSCC)CC)S7	12.389
CC(S1)=CC2=C1C3=C(C(C4=CC(CCCCCCCCCC)=C(CCNCCCCCCC)S4)=C(C5=C(C=C(C6=C(CCCCCCCCCCCC)C([P@](C7=C8SC(O)=C7CCCCCCCCCCCC)(C9=CC=CC=C9)=O)=C8S6)S5)S%10)C%10=C3C%11=CC(CCCCCCCCCC)=C(CCCPCCCCCC)S%11)S2	12.388
CC(S1)=CC2=C1C3=C(C(C4=CC(CCCCCCCCCC)=C(CCNCCCCCCC)S4)=C(C5=C(C=C(C6=C(CCCCCCCCCCCC)C([P@](C7=C8SC(O)=C7CCCCCCCCCCCC)(C9=CC=CC=C9)=O)=C8S6)S5)S%10)C%10=C3C%11=CC(CCCCCCCCCC)=C(CCCCCCCCCC)S%11)S2	12.388
CC1=CC=C(S1)S(S2)=CC3=C2C(OSC(OCCC)CC)=P(C=S(C)S4)C4=P3OCC(CCCC)CC	12.386
CC(S1)=CC2=C1C(C3PCC=C(SCCSCCCCC)S3)=C(C=C(C4=C5C(C(F)=C(C(OCC(CC)CCCC)=O)S5)=C(C)S4)S6)C6=C2C7=CC=P(SCCCCCOCC)S7	12.3855
CC(S1)=CC2=C1C(C3SCC=C(CC(CCCC)CC)O3)=C(C=C(C4=CC=C(C(N(CC(CCCCCC)COCC)C5=O)=C6C5=C(C7=CC=C(C)O7)N(CC(CCCCCC)CCCC)C6=O)O4)S8)C8=C2C9=CC=C(CC(CC)CCCC)S9	12.384
CC1=CC=S(C(S2)=C3C(C(C4=C(C[C@@H](CCCC)CC)SC(C[C@@H](CCCC)CN)=C4C3=O)=O)=C2C5=CC=C(C6=CC(C(C7=CC=C(SC[C@@H](CC)CCNC)[Se]7)=C(SS(C)=C8)C8NC9C%10=CC=C(SCC(CCCC)CC)[Se]%10)=C9S6)S5)S1	12.384
O=C(C(CCCN)CC)C1=CC2=C(C)SC(C3=CC4=C(OCC(CCCC)CC)C(SC(C)=C5)=C5C(OCP(CCPC)CC)=C4S3)=C2S1	12.382
CC(S1)=CC2=C1C(C3=CC=C(OCC(CCCC)CC)C=C3)=C(C=C(C4=C(CCCCCCCCCCCC)C=C(C5CC(S)C=C(P6=CC(CCCCCCCCCCCC)=C(C)S6)C7=NSN=C75)S4)S8)C8=C2C9=CC=C(OCC(PC)CPCC)C=C9	12.373
CC1=CC2=C(C(C3=CC=C(CCCCCC)S3)=C(CCC(C4=CC=C(S)C5SC4N=C(C6=CC=C(CCCCCC)S6)C(C7=CCCC(CCCCCC)S7)=N5)S8)C8=C2C9=CC=C(CCCCCC)S9)C1	12.373
CC1=CC2=C(C(C3NCC(CCCCCCCCCC)=C(CCCCCCCCCC)S3)=C(C=C(C4=CC=C(C5=C(F)C(F)PC(C6=CC=C(C)S6)C7=NSC=C75)S4)O8)C8=C2C9=CC(CCCCCCCCCC)=C(CCCCCCCCCC)S9)S1	12.369
CC(S1)=CC2=C1C(ONC(CCCC)CC)CC(C=C(C3=CC=C(C4=C(OCCCCCCCC)C(OCSCCNCCC)=C(C5=CC=C(C)S5)S6=NON=C64)S3)S7)C7=C2OCC(CCCC)CC	12.368
CC(O1)=CC2CC1C(C=CC=P3)=C3/C2=C(C4=C5C=C(C6=CC7=C(OCCCCCNCCPCCCCCCCCCCC)C8=C(C=C(C)S8)C(OCCCCCCCCSCCCCCCCCCCC)OC7S6)S4)/C9=C5C=CC=C9	12.358
CC(S1)=CC2OC1C(ONC(CCCC)CC)=C(C=C(C3=C4C(S(N(CCCCCCCCCCCC)C4=O)=O)=C(C)S3)S5)C5=C2OCC(CCCC)CC	12.357
NC(S1)=CC2=C1C(C3=CC=C(SCCCCCCCC)S3)=C(C=C(C4=C5S(C(F)=C(C(OCC(CP)CCCC)=O)S5)=C(C)P4)O6)C6=C2C7=CC=C(SCCCCCCCC)S7	12.353
CC(S1)=SC2=C1C(C3=CC=C(OCC(CC)CCCC)S3)=C(C=C(C4=C5C(C(F)=C(C(OCC(CC)CCCC)=O)S5)=C(C)P4)S6)C6=C2C7=PC=C(OCC(CCCC)CC)S7	12.352
CC1=CC=C(C2=CCPC(C3=NN(CCCCCCCC)N=C32)C4=CC=C(C5=CC(C(C6=CC=C(CC(CCCCCCCC)CCCCCC)S6)=C(SC(C)=C7)C7=C8C9=CC=C(CC(CCNCCCCC)CCPCCC)C9)=C8S5)S4)S1	12.351
CC1NCC=C(C(S2)=C3C(C(C4=C(C[C@OH](CCCC)CC)SC(C[C@@H](CCCC)CC)=C4C3=P)=O)=C2C5=CC=C(C6=CC(C(C7=CC=C(SC[C@@H](CC)CCCC)S7)=C(SC(C)=C8)C8=C9C%10=CC=C(SCC(CCOC)OC)S%10)=C9S6)S5)P1	12.344
CC1=CC2=C(C(C3=CP=C(SCCCCCCCN)S3)OC(C=C(C4=CC=C(C5=C(F)C(F)=C(C6=CC=C(C)S6)C7OC5S=C(C8=CC=C(CC(CC)CCCC)S8)C(C9=CC=C(CC(NC)CCCC)S9)=N7)S4)S%10)C%10=C2C%11=PC=C(SCCCCCCCC)S%11)S1	12.339
CC1=CC2=C(C(C3=CC=C(OCC(SCCC)CCCCCC)C(F)=C3)=C(C=C(C4=C(CC(PC)CCCC)C=C(C5=CC=C(C6=CC(CC(CCCC)CC)=C(C)S6)C7=NSN=C75)S4)S8)C8=C2C9=CC=C(OCC(CCCCCC)SSCC)C(F)=C9)S1	12.339
O=C(C(CCCN)CC)C1=CC2=C(C)SC(C3=CC4=C(OCC(CCCC)CC)C(SC(S)=C5)=C5C(OCP(CCPC)CC)=C4S3)=C2S1	12.338
CC(S1)=CC2=C1C(OC[C@H](CCSCCCCCCP)CCCCCCCC)=C(C=P(C3=CC(SC(C4=C(OCCCCCCCC)C(OCCCCPCCC)=C(C5=CC(SC(C)=C6)=C6S5)C7CNON=C74)=C8)=C8S3)S9)C9=C2OC[C@H](CCCCCCCC)CCCCCCCCCC	12.334
CC(S1)=CC2=C1C(OC[C@H](CCSCCCCCCP)CCCSCCCC)=C(C=P(C3=CC(SC(C4=C(OCCCCCCCC)C(OCCCCPCCC)=C(C5=CC(SC(C)=C6)=C6S5)C7CNON=C74)=C8)=C8S3)S9)C9=C2OC[C@H](CCCCCCCC)CCCCCCCCCC	12.334
CC1=CC2=C(C(C3=CC=C(/C=C/C4=CC=C(CC(CC)CCCC)S4)S3)=C(C=C(C5=PC=C(C6=C7C(C(N(CC(CCCCCCCCCC)CCCCCCCC)C7=O)=O)=C(C8=CC=C(C)S8)S6)S5)S9)C9=C2C%10=CCPC(/C=C/C%11=CC=C(CC(CCCC)OO)S%11)S%10)S1	12.333
CC(S1)=CC2=C1C(C3=CS=C(ONC(SC)CCCC)S3)=C(C=C(C4=C5C(C(F)=C(C(OCC(CC)CCCP)=O)S5)=C(C)S4)S6)C6=C2C7=CC=C(OCC(CCCC)CC)S7	12.3326
CC(S1)=CC=C1C2=C(N=C(P3=CC(OCCCCCC)=CC=C3)C(C4=CC=CS(SCCCCCC)NC4)=N5)C5=C(C(S6)=CC=C6C(S7)=CP(C7=C8OCC(CC)CCCC)=C(OCC(OCCC)CC)C9=C8C=C(C)S9)C(F)=C2F	12.332
CC(S1)=CC=C1C2=C(N=C(P3=CC(OCCCCCC)=CC=C3)C(C4=CC=CS(OCCCCCC)NC4)=N5)C5=C(C(S6)=CC=C6C(S7)=CP(C7=C8OCC(CC)CCCC)=C(OCC(CCCC)CC)C9=C8C=C(C)S9)C(F)=C2F	12.332
CC(S1)=CC=C1C2=C(N=C(P3=CC(OCCCCCC)=CC=C3)C(C4=CC=CS(OCCCCCC)NC4)=N5)C5=C(C(S6)=CC=C6C(S7)=CP(C7=C8OCC(CC)CCCC)=C(OCC(CCCC)SC)C9=C8C=C(C)S9)C(F)=C2F	12.332
O=C([C@@H](CC)CCCC)C1=CC2=P(C)SC(C3=CC4CC(C5=CC=S(CC(SCCC)CS)S5)C(SC(C)=C6)=C6C(C7=PC=C(CC(NC)CCCC)S7)=C4S3)=C2S1	12.328
SC1=CC2=C(C(OC[C@@H](CCCC)CP)=C(C=C(C3=C4C(SC(C(N5CCCCNCCC)=O)=C4C5NO)=C(C)S3)S6)C6=C2OCN(CC)CCCC)S1	12.3266
CC1=CC2=C(C(C3=CC=C(CC(CCCC)CC)S3)=C(C=C(C4=CC=C(C5=C(OCOCCCCCC)C(OSCCCCCCC)=C(C6=CC=C(S)[Se]6)C7=NSN=C75)[Se]4)S8)C8=C2C9=CC=C(CC(CC)CCCC)S9)S1	12.3236
CC1=CC2=C(C(C3=CC=C(CC(CCCC)CC)S3)=C(C=C(C4=CC=C(C5=C(OCOCCCCCC)C(OSCCCCCCC)=C(C6=CC=C(S)[Se]6)C7=NSN=C75)[Se]4)S8)C8=C2C9=CC=C(CC(CC)SCCC)S9)S1	12.3236
CC1=CC=C(C(N(CC(CCCCCCCSCCCC)CCCCCCCCCC)C2=O)=C(C2PC(C(S3)=PC=C3C(S4)=CC(C4=C5)=CC6=P5C=C(C)S6)N7CS(CCCCCCCCCCOC)CCCCCCCCCC)C7=O)S1	12.323
CC(S1)=CC2CC1C(C3NCC=C(SCCCCPCSC)S3)=C(C=C(C4PC5C(C(F)=C(C(OOC(CCCC)CC)=O)S5)=C(C)S4)N6)C6=C2C7=CC=C(SCCCCCCCC)S7	12.321
CC(S1)=CC2=C1C(C3=CC=C(CC(PCCCCCCC)CCCCCC)S3)=C(C=C(C4=CC=C(C5=CC(Cl)=C(C6=CC(CCCCCOCCCCCC)=C(C)S6)C7=NSN=C57)S4)S8)C8=C2C9=CC=C(CC(CCPCCNCC)CCCCCC)S9	12.3209
CCCCCCCCCCC1SC(SC(C2=C3SC4=C(C3=C(C5=C2C6=C(S5)C=CS6)C7=CC(CCCCCCCCCC)=C(S7)CNCCCCCCCC)SC(C8=C(CCC(S8)C9PC(C(F)=CC%10=NSN=C%109)F)CC(CCCC)CC)=C4)=C1)CCCCCCCCCC	12.316
CC(S1)=PC2=C1C(SCC(CCCCCCCC)CCCCCC)=C(CSC(C3SC(CC(CC)CCCC)C=C(C4=CC=C(C5=CC(CC(CC)CCCC)=C(C)S5)C6=NSNOC64)S3)S7)C7=C2C8=CC=C(OCC(CC)CCCC)C=C8	12.315
CCOCCCCCC1=CSC2=C1SC(C3=C4S(N(C(C4=C(S3)C5=CC6PC(C(CCCCCCPC)=C(S6)C7=CC8=C(C9=C(C(C%10NCC(Cl)=C(S%10)CC(CCCC)CC)=C8S7)C=CS9)C%11=CC(Cl)=C(S%11)CC(CSCC)CC)S5)=O)CC(CCCCCCCC)CCCCCC)=O)=C2	12.31
CC(S1)=CC=C1C2=C(F)C(F)=C(C(S3)=CC=C3C(S4)=CC(C4=C5C6=CC=C(OC[C@H](CNCC)CC)C=C6)=C(C7=CC=C(ONC(CP)CCCC)C=C7)C8=C5C=C(C)S8)C9=C2N=C(C(S%10)=CC=C%10C[C@@H](CC)CCCC)C(C%11=CC=C(S%11)CC(CC)CCCC)=N9	12.306
CC(S1)=CC2=C1C(OCC(CCCCCSCC)NCCCCC)=C(C=C(C3=C4C(C(S)=C(C(OCC(CC)CCCC)=O)S4)=C(S)S3)S5)C5=C2C6=CC=C(OCC(CC)CCCC)C=C6	12.305
CC(S1)=CC2=C1C3=C(C(OCC(CC)CCCC)=C(C4=C(C=C(C5=CC=C(/C(C(N6CC(CNCSCC)CCCCSCCC)=O)=C7C(C=CC(C)=C8)=C8N(CS(CCCCCC)CCNCCCCC)C/7=O)C6=C5)S4)S9)C9=C3OSC(CCCC)CC)S2	12.3047
CC(S1)=CC2=C1C(C3SCC=C(CC(CCCC)CCCCCC)S3)=C(C=C(C4=CC=C(C5=CC(Cl)=C(C6=CC(CC(CCCC)CC)=C(C)S6)C7=NPN=C57)S4)S8)C8=C2C9=CC=C(CC(CCCC)CCCCSC)S9	12.3024
O=C(C(CCCC)CC)C1=CC2=C(C)SC(C3=CC4=C(OCC(CPOC)CC)C(SC(C)=C5)=C5C(OCC(PCCC)CC)=C4S3)=C2S1	12.301
O=C(C(CCCC)CC)C1=CC2=C(C)SC(C3=CC4=C(OCC(CCOC)CC)C(SC(C)=C5)=C5C(OCC(PCCC)CC)=C4S3)=C2S1	12.301
CC(O1)=CC2=C1C(C3=CC=C(CC(CCCC)CC)S3)=C(C=C(C4CCC=C(C5=C(OCCNCCCCC)C(OCCCCCCCC)=C(S6=CC=C(C)S6)C7=NON=C75)S4)O8)C8=C2C9=CC=S(CC(CCPC)CC)S9	12.298
CC(O1)=CC2=C1C(C3=CC=C(CC(CCCP)CC)S3)=C(C=C(C4CCC=C(C5=C(OCCNCCCCC)C(OCCCCCCCC)=C(S6=CC=C(C)S6)C7=NON=C75)S4)O8)C8=C2C9=CC=S(CC(CCPC)CC)S9	12.298
CC(S1)=CC=C1C2=CC(F)=C(C(S3)=CC=C3C(S4)=CC(C4=C5C6=CCSC(CC(CCCC)CN)S6)=C(C7SCC=C(CC(CC)CCCC)S7)C8=C5CNC(C)S8)C9=C2N=C(C%10=CC(OCCCCCCCC)=CC=C%10)C(C%11=CC=CC(OCCCCCCSC)=C%11)=N9	12.298
CC(S1)=CS2=C1C(NNC(CCCCCCCC)CCCCCC)=C(COC(C3=C(CC(CC)CCCC)C=C(C4=C(F)C(F)=C(C5=CC(CC(CC)CCCC)=C(C)S5)C6=NSN=C64)S3)S7)C7=C2C8=CC=CC=C8	12.297
CC1=CC=C(C(S2)=C3C(C(C4=C(C[C@@H](CCCC)CC)SC(C[C@@H](CCCC)CC)=C4C3=O)=O)=C2C5=CC=C(C6=CC(C(C7=CC=C(SC[C@@H](CC)SCCC)[Se]7)=C(SC(C)=C8)C8=C9C%10=CC=C(SCC(CCCC)CC)[Se]%10)=C9S6)S5)S1	12.296
CC1=CC2=C(C(C3=CC=S(C[C@@H](CCCC)CCCCCC)S3)=C(C=C(C4=C(CC(CC)CCCC)C=C(C5=C(F)C(F)=C(C6=CC(CC(CCCC)CC)=C(O)S6)C7=NSN=C75)S4)S8)C8=C2C9=CC=C(CC(CCCCCC)CCCC)S9)S1	12.294
CC1=CC=C(C2=PC=C(C3=CC=C(C4=CC(C(SC[C@H](CCCCCC)CCCC)=C(SC(C)CC5)C5=C6SCC(CCCCCC)CCCC)=C6S4)O3)C7=NN(CC(CCPCCC)OCCC)N=C27)O1	12.294
CC(S1)OCC2=C1C(C3=CC=C(OCC(CC)CCCC)S3)=C(C=S(C4=C5C(C(F)=C(C(C(CC)CCPC)=O)S5)=C(C)S4)S6)C6=C2C7=CC=C(OCC(CCCC)CC)S7	12.294
CC(S1)=CC2=C1C(C3=CC(C=C(CC(CCCC)CCCCCC)C=C4)=C4S3)=C(C=C(C5=C(CC(CC)CCCC)C=C(C6=C(F)C(F)=C(C7=CC(PC(CCCC)CC)=C(C)S7)C8=NSN=C86)S5)S9)C9=C2C%10=CC(C=C(CC(CCCC)CCCCCC)C=C%11)=C%11C%10	12.2935
CC(S1)=CC2=C1C(C3NCC=C(C4=CC=C(C5=CC=C(C6=CC=C(CC(CCCCCC)CCCC)S6)S5)S4)S3)=C(C=C(C7=C(CC(CC)CCCC)C=C(C8=C(F)C(F)=C(C9=CC(CC(CCCC)CC)=C(C)S9)C%10=NSS=C%108)S7)S%11)C%11=C2C%12=CC=C(C%13=CC=C(C%14=CC=C(C%15=CC=C(CC(CCCC)CCCCCC)S%15)S%14)S%13)S%12	12.292
SC(S1)=CC2=C1C(C3=CP=C(PC(CCCC)CC)S3)SC(C=C(C4=SC=C(C(N(CC(CCCCCC)CCCC)C5=O)=C6C5=C(C7=CC=C(C)O7)N(CC(CCCCCC)CCCN)C6=O)O4)S8)C8=C2C9=CC=C(CC(CC)CCCC)S9	12.29
CC1=CC2=C(OCC(CCCC)CC)C3=C(P=C(C4=C5C(C(C(CSC(OCCCCCCCC)N=C6)=C6C5SO)CO)=C(C)S4)S3)C(OCC(CC)CCPS)=C2S1	12.288
CC1=CC2=C(C(C3=CC=C(CC(CCCC)CC)[Se]3)=C(P=C(C4=CC=C(C5PC(OCCCCSCPC)C(OCCCCCCCC)=C(C6=PC=C(C)S6)C7=N[Se]NOC75)S4)S8)C8=C2C9=CC=C(CC(CC)CSCC)[Se]9)S1	12.2868
CC1=CC2=C(C(C3=CC=C(CC(CCCC)CC)[Se]3)=C(P=C(C4=CC=C(C5PC(OCCCCSCPC)C(OCCCCCCCC)=C(C6=PC=C(C)S6)C7=N[Se]NOC75)S4)S8)C8=C2C9=CC=C(CC(CC)CCCC)[Se]9)S1	12.2868
PC(S1)=CC2=C1C(C3=CC=C(CC(CCCC)CC)S3)=C(C=C(C4=C5C(SC(CCCCCC)=C5)=C(C6=C(C(N(CC(CC)CCCC)C7=O)=O)C7=C(C8=C9C(C=C(NCCCCC)S9)CC(C)S8)S6)S4)S%10)C%10=C2C%11=CC=C(CC(CC)CCCC)S%11	12.284
CC1=CC2=C(P(C3=CC=C(CC(CCCC)CC)S3)SC(C=C(C4=CC=C(C5=C(OCCCOCCCC)C(OCCCCCCCC)=C(C6=CC=C(C)[Se]6)C7=NSN=C75)[Se]4)S8)C8=C2C9=CP=C(CC(CC)CCCC)S9)S1	12.283
CCCCCCCCC1=CSC2=C1SC(C3=C4C(N(C(C4=C(S3)C5=CC6=C(C(SCCCCCCC)OC(S6)C7=CC8=C(C9=C(C(C%10=CC(Cl)=C(S%10)CC(CCCC)CC)=C8S7)CNCS9)C%11=CC(Cl)=C(S%11)CC(CCCN)CC)S5)=O)CC(CCCCCCCC)CCCCCC)=O)=C2	12.283
CC1=CC=C(C(C2=C3PC(C(OCC(CCCCCC)CCCC)CO)=C2)=C4C(C=C(C(OCC(CCCCCC)CCCC)=O)S4)=C3C5=CC=C(C6=CC(C(OCC(CC)CCCC)=C(SC(C)=S7)C7=C8ONC(CCCC)CC)=C8S6)S5)S1	12.282
CP(S1)=CC2=C1C(OC[C@H](CCSC)CC)=C(C=C(C3=CC=C(C4=C(OCCCNCCCC)C(OCCCCCCCC)=C(P5=CC=C(C)S5)C6ONSN=C64)S3)S7)C7=C2OC[S@H](CCCC)CC	12.281
CC1=CC=C(C2=C(C(N(CC(CC)CCCC)C3=O)=O)C3=C(C4=CC=C(C5=SC(C(C6=CC=S(CC(CCCC)ON)S6)=C(SC(O)=C7)C7=C8C9=CC=C(CC(CCCC)CC)S9)=C8S5)S4)C=C2)S1	12.278
CC1=CC=C(C(C2=C3SC(C(OCC(CCCCCC)CCCC)=O)=C2)=C4C(C=C(C(OCC(CCCCCC)CCCC)=O)S4)=C3C5=CC=C(C6=CC(C(OCC(CC)CCCC)=C(SC(C)=C7)C7=C8OCC(CCCC)CC)=C8C6)P5)S1	12.278
CC1PCC2=C(C(C3=C(OC)C(OC)=C(CC(CCCC)CC)S3)NC(C=C(C4=C(CCCCCC)C=C(C5=C(F)C(F)=C(C6=CC(CCCCCC)=C(C)S6)C7=NSN=C75)S4)S8)C8SC2S9=C(OC)C(OC)=C(CC(CC)CCCO)S9)S1	12.272
CC1=CC=C(C(S2)=C3C(C(C4=C(C[C@@H](CCCC)CC)SC(C[C@@H](CCCC)CN)=C4C3=O)=O)=C2C5=CC=C(C6=CC(C(C7=CCSC(SC[C@@H](CC)CCNC)[Se]7)=C(SS(C)=C8)C8NC9C%10=CC=C(SCC(CCCC)CC)[Se]%10)=C9S6)S5)S1	12.272
CC(S1)=CC2=C1C(OC[C@H](CCSNCCCCCC)CCCCCCCC)=C(C=C(C3=CC(SC(C4=C(OCCCCCCCC)C(OSCCCPCCC)=C(C5=CC(SC(C)=C6)=C6S5)C7=NON=C74)=C8)=C8S3)S9)C9=C2OC[C@H](CCCCCCCC)CCCCCCCCCC	12.271
CC(S1)=CC2=C1C(CCC(CCCCCCCC)CSCCCC)=C(C=C(C3=C4C(C(P)=C(C(OCC(SC)CCCC)=O)S4)=C(C)S3)S5)C5=C2C6=CC=CC=C6	12.269
CC(S1)=CC2=C1C3=C(C(C4=CC(CCCCCCCCCC)=C(CCCCCCCCCC)S4)=C(C5=C(CPC(C6=C7C(C8=C(C(N(CCCCCCCC)C8=O)=O)S7)=C(C)S6)S5)S9)C9=C3C%10=CC(PCCCCCCCCC)=C(CCCSCCCCCC)S%10)S2	12.269
CC1=CC2=C(C(C3=CC=C(CC(SC)CCCC)S3)=C(C=C(C4=CC5=C(C=C(C6=C(C(N(CCOCCCCC)C7=O)=O)C7=C(C8=CC9=C(C=C(C)S9)S8)S6)S5)S4)S%10)C%10=C2C%11=CC=P(CC(CC)CCCC)S%11)S1	12.266
CC1=CC=C(C(S2)=C3C(C(C4=C(C[C@@H](CCCC)CC)SC(C[C@@H](CCCC)CC)SC4C3=O)=N)PC2C5=CC=P(C6=CC(C(C7=CC=C(SC[C@@H](CC)CCCC)[Se]7)=C(SC(C)PC8)C8OC9C%10=CC=C(SCC(CCCC)CC)[Se]%10)=C9S6)S5)S1	12.264
CC1=CC2=C(C(C3=CC=C(SCC(CCCC)CC)S3)=C(C=C(C4=CCCC(C5=C(F)C(F)=C(C6=CC=C(C)S6)C7=C5N=C(C8=CC=C(CC(CC)CCCC)S8)C(C9=CC=C(CC(CC)CCCC)S9)=N7)S4)S%10)C%10=C2C%11=CC=C(SCC(CC)CCCC)S%11)S1	12.2576
CC(S1)=CC2=C1C(C3=CC=C(CCCCCCCPCC)S3)NC(C=C(C4=C5C(C(N(CCCCCCCC)C5CO)=O)=C(C)S4)S6)C6=C2C7=CC=C(OCCCCCCCCC)S7	12.256
CC(S1)=CC2=C1C(OCC(CCCCCCCC)CCCCOC)=C(C=C(C3=C(CC(CC)CCCC)C=C(C4=CC=C(C5=CC(CC(CC)CCCC)=C(S)S5)C6=NSN=C64)S3)S7)C7=C2C8=CC=C(OCC(CC)CCCC)C=C8	12.2533
CC1=CC=C(C(S2)=C3C(C(C4=C(C[C@@H](CCCC)CC)SC(C[C@@H](CCCC)CO)SC4C3=O)=O)=C2C5=CC=C(C6=CC(C(C7=CC=C(SC[C@@H](CC)CCCC)[Se]7)=C(SC(C)PC8)C8=C9C%10=CC=C(SCC(CCCC)CC)[Se]%10)=C9S6)S5)S1	12.253
CC1=CC=C(C(C2=C3CC(C(OCC(CCCCCC)CCCC)=O)=C2)=C4C(CCC(C(OCC(CCCCCC)CCCC)=O)S4)=C3C5=CC=C(C6=CC(C(OCC(CC)CCCC)=C(SC(C)=S7)C7=C8OCC(CCCC)CC)=C8S6)S5)S1	12.249
CC1=CC(C(C2=CC=C(CC(CCCC)CC)S2)=C(SC(C3=CP=C(C4=C(C(N(CC(CCCCCCCCCC)CCCCCSCC)C5=O)=O)C5=C(C=C(C6=CC=C(C)S6)C(C(P7CC(CCCCCCCC)CCCCCCCCCS)=O)=C8S7=O)C8=C4)S3)=C9)C9=C%10C%11=SC=C(CC(CC)CCPC)S%11)=C%10S1	12.247
CC1=CC=C(C(P2)=C3C(C(C4=C(C[C@@H](CCCC)CC)SC(C[C@@H](CCCC)CC)=C4C3=O)=O)=C2C5=CC=C(C6=SC(C(C7=CC=C(SC[C@@H](CC)CCCC)S7)=C(SC(C)=C8)C8=C9S%10=CC=C(SCC(CCCC)CC)S%10)=C9S6)S5)S1	12.247
PC(S1)=CC2=C1C(OCC(CCCCCCCC)OCCCCC)=C(C=C(C3=C(CC(CC)CCPC)C=C(C4=CC=C(C5=CC(CC(CC)CCCC)=C(C)S5)C6SCSN=C64)S3)S7)C7=C2C8=NC=C(OCC(CC)CCCC)C=C8	12.244
NC1=CC2=C(C(C3=CC=C(CC(CC)CCCC)S3)=C(C=C(C4=C(CC(CC)CCCC)C=C(C5=C(F)C(F)=C(C6=CC(CC(CCCC)CC)=C(C)S6)C7=NSN=C75)S4)S8)C8=C2C9=CP=C(CC(CC)CCCC)S9)S1	12.2428
CC(S1)=CC2=C1C(OCC(CCCCCCPNCC)CCCPCCCC)=C(C=C(C3=CC=C(C4=SS=C(C5=CC=C(C)S5)C6NN[Se]N=C64)S3)S7)C7=C2SCC(CCCNCCCCCC)CCCCCCCC	12.24
CC(S1)=CC2=C1C(C3=CC=C(CC(CCCCNCCC)COCCCC)S3)=C(C=C(C4=CC=C(C5=CC(Cl)=C(C6=CC(CC(CCCO)CC)=C(C)S6)C7=NSC=C57)S4)S8)C8=C2C9=CCOC(CC(CCCCCCNC)CCCCCC)S9	12.2373
CC(S1)=CC2=C1C(C3=CC=C(CCCOCC)S3)CC(C=C(C4=C(CC(CC)CCSC)C=C(C5=CC=C(C6=CC(CC(OCCC)CN)=C(C)S6)C7=NSN=C75)S4)S8)C8=C2C9=CC=C(OCCCCC)S9	12.237
CC1=CC2=C(P(C3=CC=C(SCC(CCCC)CC)S3)=C(CSC(C4=C5C(C(N(CC(CP)CCCN)C5=O)=O)=C(C)S4)S6)C6=C2C7=CC=C(SCC(CCCC)CC)S7)S1	12.227
CC(S1)=CC=C1C2=C(NPC(C3=CC(OC[C@H](CC)CCOC)=CC=C3)C(C4=CC=NC(OCC(CC)CCCC)=N4)=N5)C5=C(C(S6)=CC=C6P(S7)=CC(C7=C8C9=CC=C(CC(CC)CCCC)S9)=C(C%10NCC=C(CC(CCCC)CC)S%10)C%11=C8C=C(C)S%11)C=C2	12.227
CC(S1)=CC=C1C2=C(OCCCCCCCC)C(OCSCCCCCC)=C(C(S3)=CC=C3C(S4)=CC(C4=C5OCP(CCCC)CC)=C(OC[C@H](CC)CCSC)C6=P5C=C(C)S6)C7=C2N=C(C8=CC=C(OC)C=C8)C(C9=CC=C(OC)C=C9)=N7	12.224
O=C(N1CC(CCCCCCCC)CCCCCCCCCC)/S(C2=C1C=C(C(S3)=CC=C3C4=CC(C(C5=CCPC(CC(CC)CCCC)S5)=C(SC(C6=CC=C(C)S6)=C7)S7=C8C9=CC=C(CC(CC)CCCC)S9)=C8S4)C=C2)=C%10C(N(CC(CPCCCCCCCC)CCCCCCCC)C%11=CC(C)=CC=C%11/%10)=O	12.222
CC1=CC2=C(C(C3=CC=C(CCCCCC)S3)=C(CCC(C4=CC=C(C)C5SC4N=C(S6=CCCC(CCCCCC)S6)C(C7=CCCC(CCCCCC)S7)=N5)S8)C8=C2C9=CC=C(CCCCPC)S9)C1	12.222
CC1=CC2=C(C(OC[C@@H](CCCC)CC)=C(C=C(C3=C4C(SC(C(N5CCCCNCCC)=O)=C4C5=O)=C(C)S3)S6)C6=C2OCC(CC)CCNC)S1	12.219
CC1CCC2=C(C(C3=CC=C(SCCCCCCCN)S3)=C(C=C(C4=CC=C(C5=C(F)C(F)=C(C6=CC=C(C)S6)C7OC5S=C(C8=CC=C(CC(CC)CCCC)S8)C(C9=CC=C(CC(NC)CCCC)S9)=N7)S4)S%10)C%10=C2C%11=CC=C(SCCCCCCCC)S%11)S1	12.217
CC(S1)=CC2=C1C(C3=CC=C(CC(CCCCCPCC)CCCCCC)S3)=C(C=C(C4=CC=C(C5=CC(Cl)=C(C6=CC(CC(CCCC)CC)=C(C)S6)C7=NSN=C57)S4)S8)C8=C2C9=CC=C(CC(CCCCCCCC)CCCCCC)S9	12.2107
CC1=CC=C(C(S2)=C3C(C(C4=C(C[C@@H](CCCC)CC)SC(C[C@@H](CCCC)CC)=C4C3=O)=O)PC2C5=CC=C(C6=CC(C(C7=CP=C(CCCCCCCC)S7)=C(SC(C)=C8)C8=C9C%10SCC=C(SCCCCCCC)S%10)=C9S6)S5)S1	12.21
CC1=CC2=P(C(OPC(CC)CCCC)=C(C=C(C3=CC(/C=C/C4=C(CC(CC)CCCC)C=C(C5=C(F)C(F)=C(C6=CC(C[C@@H](CCCN)CP)=CS6)C7=NSN=C75)S4)=C(C)P3)S8)C8=C2OCC(CC)CCCC)S1	12.208
CC1=CC2=C(S1)C(C3=NC=P(CCCCCCCCCC)S3)=C4C(SC(C5=C(SS(C(OCCCOCCCCCCPC)=O)=C6)C6=C(C)S5)=C4)=C2C7=CC=C(CCCCCCCCCC)S7	12.207
CC1=CC2=C(S1)C(C3=NC=P(CCCCCCCCCC)S3)=C4C(SC(C5=C(SS(C(OCCCOCCCCCCCC)=O)=C6)C6=C(C)S5)=C4)=C2C7=CC=C(CCCCCCCCCC)S7	12.207
CC(S1)=CC2=C1C(OC[C@@H](CCCCCCCCCC)CCCCCCCC)=C(C=C(C3=CC(SC(P4=C(OCCCCCCCC)C(OCCCCCCNC)=C(C5NCC(SC(C)=C6)=C6S5)C7=NSN=C74)=C8)=C8S3)S9)C9=C2OC[C@H](CCCCCCCC)NPCCCCCOCC	12.2062
CC(S1)=CC2=C1C(OC[C@@H](CCCCCCCCCC)CCCCCCCC)=C(C=C(C3=CC(SC(P4=C(OCCCCCCCC)C(OCCOCCCNC)=C(C5NCC(SC(C)=C6)=C6S5)C7=NSN=C74)=C8)=C8S3)S9)C9=C2OC[C@H](CCCCCCCC)CPCCCCCOCC	12.2062
OOC1N(CCCCPCCC)C(C2=C(C)SC(C(S3)=CC4=C3C(C5=CC=C(CC(CC)CCCC)S5)=C6C(SC(C)=C6)=C4C7=CC=C(C[C@H](CNCC)CC)S7)OC21)OO	12.2044
CC(S1)=NC2=C1C3=C(C(C4=CC(CCCCCCCCCC)=C(CCCCCCNCCC)S4)=C(C5=C(CNC(C6=C7C(C8=C(C(N(CCCCCCCC)C8=O)=O)S7)=C(C)S6)S5)S9)C9=C3S%10=CC(CCCCPCCCCC)=C(CCCCCCCCCC)S%10)S2	12.2012
CC(S1)=CC2=C1C(C3=CC=C(SCCC(C)CCCC(C)C)S3)=C(C=C(C4=C5C(C(O)OC(C(OCC(CCCC)CC)=O)S5)=C(C)S4)S6)C6=C2C7=CC=C(SCCC(C)CCCC(O)C)S7	12.2
CC1=CC2=C(C(CC[C@@H](CCCC)CC)=C(C=C(C3=C4C(SS(C(P5CCCCCCCC)=O)OC4S5=O)=C(C)S3)S6)C6=C2OCC(CC)CCCC)S1	12.2
CC1=CC(C(C2=CC=C(CC(CCCC)CC)S2)=C(SC(C3=CP=C(C4=C(C(N(CC(CCCCCCCCCC)CCCCCSCC)C5=O)=O)C5=C(C=C(C6=CC=C(C)S6)C(C(N7CC(CCCCCCCC)CCCCCCCCCN)=O)=C8S7=O)C8=C4)S3)=C9)C9=C%10C%11=SC=C(CC(CC)CCPC)S%11)=C%10S1	12.199
CC(S1)=CC2=C1C(C3=CC=C(CC(CCCCCC)CP)S3)=C(C=C(C4=CC=C(C5=CCNC(C6=CC=C(C)S6)C7=NSN=C75)S4)S8)C8=C2C9CCC=C(CC(CCCCCC)CC)C9	12.196
CC1=CC2=C(C(OCC(CC)CNCC)=C(C=C(C3=CC=C(N(C4=CC=C(C)C=C4)C5=CC=C(C6=CC=C(C7=CC=C(C8=CC=C(CCCCCCCC)S8)C9=NSN=C97)S6)C=C5)C=C3)S%10)C%10SC2OCC(CC)CCCC)S1	12.195
CC(S1)=CC2=C1C(C3NCS=C(OCC(CC)CCCS)S3)=C(C=C(C4=C5C(C(F)=C(C(COC(CC)CCCC)=O)S5)=C(C)S4)S6)C6=C2C7CCC=C(SCC(CCCC)CC)O7	12.1905
CC(S1)=CC2SC1C(C3=CC=C(OCC(CC)CCCC)S3)=C(COC(C4=C5C(C(O)=C(C(C(CC)CCNC)=O)S5)=C(C)S4)S6)C6=C2C7=CC=C(OCC(CCCC)CC)S7	12.189
CC(S1)=PC2=C1C(C3=CC=C(NCCCCC)S3)=C(C=C(C4=C(CC(CC)CCCC)C=C(C5=CC=C(C6=CC(CC(CCCC)CN)=C(C)S6)C7=NSN=C75)S4)N8)C8=C2C9=CC=C(OCCCCC)S9	12.187
CC(S1)=CC2SC1C(ONC(CCSCCCOC)CCCPCC)=C(C=C(C3=C4C(C(F)=C(C(OCC(CC)CCNC)=O)S4)=C(C)S3)S5)C5=C2C6=CC=CC=C6	12.1838
PC(S1)=CC2=C1C(OCC(CCCCCCCC)OCCCCC)=C(C=C(C3=C(CC(CC)CCCC)C=C(C4=CC=C(C5=CC(CC(CC)CCCC)=C(C)S5)C6SCSN=C64)S3)S7)C7=C2C8=NC=C(OCC(CC)CCCC)C=C8	12.18
CC(S1)=CC2=C1C(C3=CC=C(OCC(CC)CCCC)S3)=C(C=C(S4=C5C(C(F)=C(C(C(CC)CSCC)NO)S5)PC(C)S4)S6)C6=C2C7=CC=C(OCC(CCCC)CP)S7	12.18
O=C1N(CCCSCSCC)C(C2CC(C)SC(P(S3)=CC4=C3C(OC[C@@H](CC)CCCC)=C5C(SC(C)=C5)=C4OCC(PC)CSCC)=C21)=O	12.18
CC1=CC=C(C(S2)=C3C(C(C4=C(C[C@OH](CCCC)CC)SC(C[C@@H](CCCC)CC)=C4C3=P)=O)=C2C5=CC=C(C6=CC(C(C7=CC=C(SC[C@@H](CC)NCCC)S7)=C(SC(C)=C8)C8=C9C%10=CC=C(SCC(CCOC)OC)S%10)=C9S6)S5)P1	12.178
CC1=CC=C(C(S2)=C3C(C(C4=C(C[C@@H](CSCC)CC)SC(O[C@@H](CSCC)CC)=C4C3=O)=O)=C2C5=CC=C(C6=CC(C(C7=CC=C(SC[C@@H](CC)CCCC)S7)PC(SC(C)=C8)C8=C9C%10=SC=C(SCC(CCCC)CC)S%10)=C9S6)S5)S1	12.177
NC(S1)=CC2=C1C(C3=CC=C(SCCC(N)CCCC(C)C)S3)=C(S=C(C4=C5C(C(F)=C(C(OCC(CCCC)CC)=O)S5)=C(P)S4)S6)C6=C2C7=CC=C(SCCC(C)CCCC(C)C)S7	12.177
CC1=CC2=C(C(C3=CC=C(OCC(SCCC)CCCCCC)C(F)=C3)=P(C=C(C4=C(CC(PC)CCCC)C=C(C5=CC=C(C6=CC(CC(CCCC)CC)=C(C)S6)C7=NSN=C75)S4)S8)C8=C2C9=CC=C(OCC(CCCCCC)SSCC)C(F)=C9)S1	12.176
NC(S1)=CC2SC1C(OCC(CCCCCCPC)CCCCCC)=C(C=C(C3=C4C(C(F)=C(C(OCC(CC)CNCC)=O)S4)=C(C)S3)S5)C5=C2C6=CC=CC=C6	12.174
NC(S1)=CC2SC1C(OCC(CCCCCCCC)CCCCCC)=C(C=C(C3=C4C(C(F)=C(C(OCC(CC)CNCC)=O)S4)=C(C)S3)S5)C5=C2C6=CC=CC=C6	12.174
CC(S1)=CC=C1C2=C3C(C(N(CC(CC)CCCC)C3=O)=O)=C(C(S4)=CC=C4C(S5)=CS(C5=C6C7=CC=C(CC(CCCC)CC)S7)=C(C8=CC=C(CS(CC)CCCC)C8)C9=C6C=C(C)S9)C%10=C2N=C(C%11=CC(OCCCCCCCC)=CC=C%11)C(C%12=CC=CC(OCCCCCCCC)=C%12)=N%10	12.173
CS(S1)=CC2=C1C(C3=CC=C(CC(CCOC)CC)S3)=C(C=C(C4=CC=C(C(N(CC(CCCCCC)CCCC)C5=O)=C6C5=C(C7=CC=C(C)O7)N(CC(CCCCCC)CCCC)C6=O)O4)S8)S8=C2C9=PC=C(CC(CC)CCCC)S9	12.172
CC(S1)=CC2=C1C(C3=CC=C(SCC(CC)CCCC)S3)=C(C=C(C4=C5C(C(F)NC(C(OCC(CC)CCCO)=O)S5)NC(C)S4)S6)C6=C2P7=PC=C(SCC(CCCC)CC)S7	12.17
CC(S1)=CC2PC1C(OC[C@@H](CCCCCCCCCC)SCCCCCCC)=C(C=C(C3=C(CCCCCP)C(SC(C4=CC=C(C5=CC(SS(C)=C6CCCCCC)=C6S5)C7=NSN=C74)=C8)=C8S3)S9)C9NC2OC[C@H](CCCCCCCC)CCCCCCCCCC	12.169
CC1=CC2=C(C3=CC=C(CC(CC)NCCC)S3)C4=C(C=C(C5=CC=C(C(N(CC(CCCC)CC)C6=O)NC7C6PC(C8=CC=C(C)O8)N(CC(CC)POCC)P7=O)O5)S4)C(C9=CC=C(CC(CCCO)CC)S9)=C2S1	12.1673
CC(S1)=CC=C1C2=C(N=C(C3=CC(OCPCCCC)=CC=C3)C(C4=CC=CC(OCCOCCC)=C4)=N5)C5=C(S(S6)=CC=C6P(S7)=CC(C7=C8OCC(CC)CCCC)SC(OCC(CCCC)CC)C9=C8C=C(O)S9)C(F)=C2F	12.166
CC(S1)=CC2=C1C(C3=CC=C(CC(CCCC)CC)S3)=C(C=C(C4=C5C(SC(CCCCCC)=C5)=C(C6=C(C(N(CC(CC)CCCC)C7=C)=O)C7=C(C8=C9C(C=C(NCCCCC)S9)=C(C)S8)S6)S4)S%10)C%10=C2C%11=CC=C(CC(CC)CCCC)S%11	12.166
CC(S1)=CC2=C1C(C3=CC=C(CC(CCCN)CCCCCP)S3)=C(C=C(C4=CC=C(C5=CC(Cl)=C(C6=CC(CC(CCCC)CC)=C(N)S6)C7=NPN=C57)S4)S8)C8=C2C9=CC=C(CC(CCCC)CCCCSS)S9	12.1642
CC1=CC=C(C2=CC3=C(C=C(C4=CC=C(C5=CC(C(C6=CC=C(CC(CCCC)CCCCCC)S6)=C(SC(C)=P7)C7=C8C9=CC=C(CC(CCCC)CCCCCC)S9)PC8S5)S4)C%10=C3N=C(C%11=CC=C(CCCCCCCN)S%11)C(C%12=CC=C(CCCCCCCC)S%12)=N%10)C%13=C2N=C(C%14=CC=C(CCCCCCCC)S%14)C(C%15SCC=S(CCCCCPCC)S%15)=N%13)S1	12.163
CC(S1)SCC2=C1C(C3SCC=C(SPCCCCCCC)S3)=C(C=C(C4=C5C(C(F)=C(C(OCC(CC)CCCC)=O)S5)=C(C)S4)S6)C6=C2C7=CC=P(SCCCCCCCC)S7	12.163
O=C(C(CCCC)CC)C1=CC2=C(C)SC(C3=CC4=C(OOC(CCOC)CC)C(SC(C)=C5)=C5C(OCC(PCCC)CC)=C4S3)=C2S1	12.162
CC1=CC=C(C2=PC=C(C3=CC=C(C4=CC(C(SC[C@H](CCCCCC)CCCC)=C(CC(C)=C5)C5=C6SCC(CCCCCC)CCCC)=C6S4)O3)C7=NN(CC(CCPCCC)CCCC)N=C27)O1	12.156
CC(S1)=CC2=C1C3=C(C(C4=CC(CCCCCCCCCC)=C(CCCCCCCCCC)S4)=C(C5=C(C=C(C6=C(CCCCCS)C=C(C7=CC(C8=NSN=C8C(C9=CC(CCCCCC)=C(C)S9)=C%10)=C%10C%11=CSN=C%117)S6)S5)S%12)C%12=P3C%13=CC(CCCCCCCCCC)=C(CCCCCCCCCC)S%13)S2	12.155
CC(S1)=CC2=C1C3=C(C(C4=CC(CCCCCCCCCC)=C(CCCCCCCCCC)S4)=C(C5=C(C=C(C6=C(CCCCCC)C=C(C7NCC(C8=NSN=C8C(C9=CC(CCCCCC)=C(C)S9)OC%10)=C%10C%11=NSN=C%117)S6)S5)S%12)C%12=C3C%13=CC(CCCCCCCCCC)=C(CCCCCCCCCC)S%13)S2	12.15
O=P1N(C(CCCCCCCC)CSCCCCCC)C(C2=C(C)SC(C3=CC4OC(OC[C@@H](CC)CCCC)C(SP(C)=C5)=C5C(OCC(CS)CCCC)SC4S3)=C21)=O	12.143
CC(S1)=CC2=C1C(C3=CC=C(CCCCCC)S3)=C(C=C(C4=C(CC(CC)CCCC)C=C(C5CCC=C(C6=CC(SC(CCCC)CC)=C(C)S6)C7=NSN=S75)S4)S8)C8=C2C9=CC=C(NCCCCC)S9	12.1317
CC(S1)=CC2=C1C3=C(C(P4=CC(CCCCCCCCCC)=C(CCCCCCNCCC)S4)=C(C5=C(C=C(C6=C(CCCCCC)C=C(C7=CC(C8=NSN=C8C(C9=CC(CCCCCC)=C(C)S9)=C%10)=C%10C%11=NSN=C%117)S6)S5)S%12)C%12=C3C%13=CC(CCCCCCCCCC)=C(CCPCCCCCCC)S%13)S2	12.13
SC1=CC2=S(OCC(PC)CCCC)C(S3)CC(C(OCC(CC)CCCC)=C2S1)C=C3C4=CC5=C(/C(C(N5CC(CCCCCCCS)CCCCCC)=O)=C6C(N(CC(CCCCCC)CCCCCCCC)C7=CC(C)=CCSC7C6)PO)C=C4	12.126
CC(S1)=CC2=C1S(SCC(CCCC)CC)=C(C=C(C3=C4C(C(C(C=C(OCCCCC)C(CCCCCC)PC5)=C5C4=O)=O)=C(C)S3)S6)C6=C2OCC(CCNC)CC	12.125
CC1=CC2=S(NCC(PCNC)CC)C3=C(C=C(P4=C5C(C(C(C=C(OCCCCCNCC)C(OCCCCCCCC)=C6)=C6C5=O)=O)=C(C)S4)S3)P(OCC(CC)CCCC)=C2S1	12.122
CC(S1)=CC2=C1C(C3=CP=S(SCC(COCC)CC)S3)=C(C=C(C4=C5C(C(F)=C(C(OCC(CCCC)CC)=O)S5)=C(C)S4)S6)C6=C2C7=CC=C(CCC(CC)CCCC)S7	12.119
CC(S1)=CC2=C1C(C3=CC=C(OCC(CC)COCC)S3)=C(C=C(C4=C5C(C(F)=C(C(SCC(CC)CCCC)=O)S5)=C(C)S4)S6)C6=C2C7=CPCC(OCC(CCCC)CC)S7	12.117
CC(S1)=CC2=C1C(CCC(CCCCCCCC)OSCCCC)=C(C=C(C3=C4C(C(P)=C(C(OCC(CC)CCCC)=O)S4)=C(C)S3)S5)C5=C2C6=CC=CC=C6	12.1166
CC1=CC2=C(C(C3=CC=C(CC(PCCC)CC)S3)=C(C=C(C4=C(CCCCCCCC)C5=C(C=C(C6=C(C(N(CC(CCCCCCCC)CCCCCC)C7=O)=O)C7=C(C8=CC9=C(C(CCCCCCCC)=C(C)S9)S8)S6)S5)S4)S%10)C%10=C2S%11=CC=C(CC(CCCC)CC)S%11)S1	12.113
CC1=CC2=C(C(C3=CC(CCCCCCCCCS)NC(CCCCCCCCCC)S3)=S(C=C(C4=CC5=C(C(SC(C)=C6)=C6C7=NSN=C75)S4)S8)C8=C2C9=CC(CCCPCCCCCC)=C(CCCCCCCCNC)S9)S1	12.11
CC1=CC=C(C(S2)=C3C(C(C4=C(C[C@@H](CCOC)CC)SC(C[C@@H](CCCC)OC)=C4C3=O)=O)=C2C5=CC=C(C6=CC(C(C7=CC=C(CCCCCCCC)S7)=C(OC(C)=C8)C8=C9C%10=CC=P(CCCCCCCC)S%10)=C9S6)S5)S1	12.11
CP(S1)=CC2=C1C(OCC(CCCCCCCC)CCCCCP)=C(C=C(C3=C(CC(CC)CCCC)C=C(C4=CC=C(C5=CC(CC(CO)CCCC)=C(C)S5)C6=NSN=C64)S3)S7)C7=C2C8=SC=C(OCC(CC)COCC)C=C8	12.11
CC1=CC=C(C(S2)=C3C(C(C4=C(C[C@@H](CCCC)CC)SC(C[C@@H](CCCC)OC)=C4C3=O)=O)=C2C5=CC=C(C6=CC(C(C7=CC=C(CCCCCCCC)S7)=C(OC(C)=C8)C8=C9C%10=CC=P(CCCCCCCC)S%10)=C9S6)S5)S1	12.11
CC(S1)=CC2=C1C(C3=CC=C(SCCC(N)CCCC(C)C)S3)=C(S=C(C4=C5C(C(F)=C(C(OCC(CCCC)CC)=O)S5)=C(P)S4)S6)C6=P2C7=CC=C(SCCC(C)CCCC(C)C)S7	12.097
CC(S1)=CC2=C1C(SCC(CCCCCCCC)CCCCCC)=C(C=P(C3=C(CC(CC)CCCC)C=C(C4=CC=C(C5=CC(CC(CC)CCSC)=C(C)S5)C6=NSN=C64)S3)S7)S7=C2C8=CC=S(OCC(CC)CCCC)C=C8	12.097
CC(S1)=NC2=C1C(C3=CC(C=C(CC(CCCC)CCCCCC)C=C4)=C4S3)=C(C=C(C5=C(CC(CC)CCCC)C=C(C6=C(F)C(F)=C(C7=CC(CC(CCCC)CC)=C(C)S7)C8=NSN=C86)C5)S9)C9=C2C%10=CC(C=C(CC(CCCC)CCCCCC)C=C%11)=C%11C%10	12.096
CC1=CP(N(P[C@@H](NCCCCCCCCC)CCCCCCCC)C(C2=C3SC(C4=CC5=C(C(OC[C@H](CC)CCCC)=C(CPC(C)S6)C6=C5OC[C@@H](CCCP)CC)S4)=C2)=O)=C3S1	12.0953
CC1=CCNC(C(S2)=C3C(C(C4=C(N[C@@H](CCCC)CC)SC(C[C@@H](CCCC)CC)=C4C3=O)=O)=C2C5=CCOC(C6=CC(C(C7=CC=C(CCCCCCCC)S7)=C(SC(C)=C8)C8=C9C%10SCC=C(CNCCCCCC)S%10)=C9C6)S5)S1	12.095
CC1=CC=C(C(S2)=C3C(C(C4=C(C[C@@H](CCPC)CC)SC(C[C@@H](CCCC)CC)=C4C3=O)=O)=C2C5=CC=C(C6=CC(C(C7=CC=C(SC[C@@H](CC)CCCS)S7)=C(SC(C)=P8)C8=C9C%10=CC=C(SCC(CCCC)OC)S%10)=C9S6)S5)S1	12.092
O=C(OCC(CC)OCCC)C1=C(N)C2=C(C3=CC4=C(C(C5=CC(PC(CC(CC)CCCS)=C6)=C6S5)=C(C=C(C)S7)C7=C4C8SCC(SC(CC(CCCC)CC)=C9)=C9N8)S3)SC(C)=C2S1	12.0855
CC(S1)=CC2=C1C3=C(C(C4=CC(CCCCCCCCCC)=C(CCCCCCCCCC)S4)=C(C5=C(CPC(C6=C7C(C8=C(C(N(CCCCCCCC)C8=O)=O)S7)=C(S)S6)S5)S9)C9=C3C%10=CC(PCCCCCCCCC)=C(CCCSCCCCCC)S%10)S2	12.079
CC1NCC=C(C(N(CC(CCCCCC)CCCC)C2=O)=C(C2=C(C(S3)=CC=C3C(S4)=CC(C4=C5CCCOCCCCCCCC)=C(CCCCSCCCCCCC)C6=C5C=C(C)S6)N7CC(CCCC)CCCPCC)C7=O)S1	12.077
SC1=CC=C(C(N(CC(CCCC)CC)C2=O)=C(C2=C(C(S3)=CC=C3C(S4)=CC(C4=C5C6=CC=C(CC(CC)CCCC)O6)=C(C7=CC=P(CC(CP)CCCC)O7)C8=C5C=C(C)O8)N9CC(CC)CCCC)C9=O)S1	12.076
CC(S1)=CC2OC1C(OCC(CCCCCCCCCC)CCCCCCCC)=C(C=C(C3=CC=C(C4=CC=C(C5=CCSC(C)S5)C6=NSN=S64)S3)S7)C7=C2OCC(CCNCCCCCCC)CCCCCCCC	12.073
CC(S1)OCC2=C1C(C3=CN=C(CC(CCCC)CC)S3)=C(C=C(C4=C5C(C=C(CCCCCC)S5)=C(C6=C(C(N(CC(CC)CCNC)C7=O)=O)C7=C(C8=C9C(CC(CCCCCC)=C9)=C(C)S8)S6)S4)S%10)C%10=C2C%11=CC=C(CC(CC)CCCN)S%11	12.073
CC1=CCOC(C(N(CC(CCNCCC)CCCC)C2=O)OC(C2NC(C(S3)=NC=C3C(S4)=CC(C4=C5CCCCCCCCCCCC)=C(CCCCCCCCCCCC)C6=C5C=C(C)S6)N7CC(CCCC)CCOCCC)C7=O)S1	12.068
CC(S1)=CC2=C1C(C3=CC=C(CC(CCCC)CC)S3)OC(C=C(C4=C(CC(CC)CCCC)C=C(C5=C(F)C(F)=C(C6=CC(CC(CCCC)CC)=C(C)S6)C7=NSS=C75)S4)S8)C8=C2C9=CC=C(CC(CCCC)CC)S9	12.064
CC(S1)=CC2=C1C(C3=CC=C(CC(CCCC)SCCCCC)S3)=C(N=C(C4=CC=C(C5=CC(Cl)=C(C6=CC(CCCCCCCCSCCC)=C(C)S6)C7=NSN=C57)S4)S8)C8=C2C9=CP=C(CC(CCCC)CCCCCC)S9	12.0631
CC1=CC2OC(C(C3=CC=C(CC(CCCC)CC)[Se]3)=C(C=C(C4=CC=C(C5=C(OCCCCCCCC)C(OCCCCCCCC)=C(C6=CC=C(C)S6)C7=N[Se]N=C75)S4)S8)C8=S2C9=CCNC(CC(CC)CCCC)[Se]9)C1	12.063
CC1=CC2OC(C(C3=CC=C(CC(SCCC)CC)[Se]3)=C(C=C(C4=CC=C(C5=C(OCCCCCCCC)C(OCCCCCCCC)=C(C6=CC=C(C)S6)C7=N[Se]N=C75)S4)S8)C8=S2C9=CCNC(CC(CC)CCCC)[Se]9)C1	12.063
CC(O1)=CC2=S1C(OCC(CCCC)CC)=C(C=C(C3=CC(CCCCCCCC)=C(C4=C5C(C(N(CCCSCCCC)C5=O)=O)=C(C6=C(CCCCCCCC)C=C(C)S6)S4)S3)S7)C7=P2OCC(CCCC)CS	12.063
CC(S1)=CC=C1C2NCC=C(C(S3)=CC=C3C(S4)=CC(C4OC5OCCCCCCCC)=C(OCCCCCCCC)C6OC5C=C(C)S6)C7=C2N=C(C8=CC=C(C9=CC(CCCNCCCC)=CO9)C=C8)C(C%10=CC=C(C%11=CC(CCCCCCCC)=CS%11)COC%10)=N7	12.062
CP(S1)=CC2=C1C(OCC(CCCC)CS)PC(CNC(C3=C4C(C(N(CC(CCCC)CC)C4=O)=O)=C(C)S3)S5)C5=C2NCC(OCCC)CC	12.062
CC1=CC2=C(C(C3=CC=C(CC(CCCC)CC)S3)=C(C=C(C4=CC=C(C5NC(OCOCCCCCN)C(OCCCCCCCC)=C(C6=CC=C(C)[Se]6)C7=NNN=C75)[Se]4)S8)C8=C2C9=CC=C(NC(CC)CCCC)S9)S1	12.058
CC(S1)CPC2=C1C(SCC(CCCCCCCC)CCCCCC)=C(CSC(C3SC(CC(CC)CCCC)C=C(C4=CC=C(C5=CC(CC(CC)CCCC)=C(C)S5)C6=NSNOC64)S3)S7)C7=C2C8=CC=C(OCC(CC)CCCC)C=C8	12.057
CC(S1)=CC2=S1C(OCC(CCCCCCCCCC)CCCCCCCC)=C(C=C(C3=CC=C(C4=CC=C(C5=CC=C(C)S5)C6=N[Se]N=C64)S3)S7)C7NC2OCC(CCCCCCCCCC)PCCCCCCC	12.0552
CC1=CC2=C(C(C3=CC=C(SCC(CCCC)CC)S3)=C(C=C(C4=CC=C(C5=C(F)C(F)=C(C6=CC=C(C)S6)C7=C5N=C(C8=CC=C(CC(CC)CCCC)S8)C(C9=CC=C(CC(CC)CCCC)S9)=S7)S4)S%10)C%10=C2C%11=CCSC(SCC(CC)CCCC)S%11)S1	12.052
CC1=CC2=P(C(OCC(CC)CNCC)=C(C=C(C3=CC(/C=C/C4=C(CN(CC)CCCC)C=C(C5=C(F)C(F)=C(C6=CC(C[C@@H](CCCC)CC)=CS6)C7=NSN=C75)S4)=C(C)P3)S8)C8=C2OCC(CC)PCCC)S1	12.052
CC1=CC2=C(OCC(CCCC)CC)C3=C(P=C(C4=C5C(C(C(CSC(OCCCCCCCC)N=C6)=C6C5SO)=O)=C(C)S4)S3)C(OCC(CC)CCPS)=C2S1	12.05
CC1=CC2=C(OCC(CCCC)CC)C3=C(P=C(C4=C5C(C(C(CSC(OCCCCCCCC)N=C6)=C6C5SO)=O)=C(C)S4)S3)C(OCC(CN)CCPC)=C2S1	12.05
CC(S1)=CC=C1C2=C(F)C(F)=C(C(S3)=CC=C3C(S4)=CC(C4=C5C6=CN=C(C[C@H](CCCP)CC)S6)=C(C7=CC=C(CC(CC)CCCC)S7)C8=C5C=C(C)S8)C9=C2N=C(C%10=CC=C(CC[C@@H](CC)CCCC)C=C%10)C(C%11=CC=C(OCC(CC)CCCO)C=C%11)=N9	12.049
O=C1N(CC(CC)CCCC)C(C2=CC=C(C)C2)=C3C1OC(P4=CC=C(C5=CC6=C(C(OCCCCCCCC)=S(C=C(C)S7)C7=P6OCCCCCCCC)S5)S4)N(CC(SCCC)CC)C3=O	12.048
CC1=C2C(SC(C(OCC(CC)CCCC)=O)=C2F)=C(C3=CC4=C(C5=CC=S(CC(CCCC)CC)S5)N6OC(S=C(C)S6)C(C7PCC=C(CC(CC)CCCC)S7)=C4S3)S1	12.047
CC(S1)=CC2=C1C(OC[C@@H](CCCCSCCCCC)CCCCCPCC)=C(C=C(C3=C(CCCCCC)C(NC(C4=CC=C(C5=CC(SS(C)=C6CCCCCS)=C6S5)C7=NSN=C74)=C8)=C8S3)S9)C9NC2OC[C@H](CCCCCCCC)CCCCCCCCCC	12.046
CC(S1)=CC2=C1C(OC[C@@H](CCCCSCCCCC)CCCCCCCC)=C(C=C(C3=C(CCCCCC)C(NC(C4=CC=C(C5=CC(SS(C)=C6CCCCCS)=C6S5)C7=NSN=C74)=C8)=C8S3)S9)C9NC2OC[C@H](CCCCCCCC)CCCCCCCCCC	12.046
CC(S1)=CC2=C1C(SCC(CCCCCCCC)CCCCCC)=C(C=P(C3=C(CC(CC)CCCC)C=C(C4=CC=C(C5=CC(CC(CC)CCSC)=C(C)S5)C6=NSN=C64)S3)S7)C7=C2C8=CC=S(OCC(CC)CCCC)C=C8	12.0458
CC(S1)OCC2=C1C(ONC(CCCC)CC)=C(C=C(C3=CC(CCCCCC)=C(C4=CC=C(S5=P(CCCCCC)C=C(C)S5)C6=NSN=C64)S3)S7)S7=C2OCC(CC)CCCC	12.045
CC(S1)=CC=C1C2=C(N=C(P3CCS(OCCCCCC)=CC=C3)C(C4=CC=NS(OCCCCCC)NC4)=N5)C5=C(C(S6)=CC=C6C(S7)=CP(C7=C8OCC(CC)CCCC)=C(OCC(CCCC)CC)C9=C8C=C(C)S9)C(F)=C2F	12.043
CC(S1)=CC=C1C2=C(N=C(P3=CC(OCCCCCC)=CC=C3)C(C4=CC=NS(OCCCCCC)NC4)=N5)C5=C(C(S6)=CC=C6C(S7)=CP(C7=C8OCC(CC)CCCC)=C(OCC(CCCC)CC)C9=C8C=C(C)S9)C(F)=C2F	12.043
CC(S1)=CC2OC1C(OCC(CCNC)CC)PP(N=C(C3PC4C(C(N(CS(CCCC)CC)C4=O)=O)=C(C)S3)S5)C5=C2OCC(CCCC)CC	12.0428
CC1=CC=C(C2=CC3=C(C=C(C4=CC=C(C5=CC(C(C6=CC=C(CC(CCCC)CCCCCC)S6)=C(SC(C)=P7)C7=C8C9=CC=C(CC(CCCC)CCCCCC)S9)PC8S5)S4)C%10=C3N=C(C%11=CC=C(CCCCCCCC)S%11)C(C%12=CC=C(CCCCCCCC)S%12)=N%10)C%13=C2N=C(C%14=CC=C(CCCCCCCC)S%14)C(C%15SCC=S(CCCCCCCC)S%15)=N%13)N1	12.041
CC1=CC=C(S(N(CC(CCCCCC)CCCC)C2=P)NC(C2=C(C(S3)=CCSC3C(S4)=CC(C4=C5CCCCCCCCCCCC)=C(CCCCCSCCCCCP)C6=C5C=C(C)S6)N7CC(CCCP)CCCCCC)C7=O)S1	12.038
CC(S1)OCC2=C1C(OC[C@@H](CCCCOCCCCC)CCCCCCCC)=C(C=C(C3=CC(PC(C4=C(OCCCCCCPC)C(OCCCCCCCC)=C(C5=CC(SC(C)=C6)=C6S5)C7=NSN=C74)=C8)=C8S3)S9)C9NC2CC[C@H](CCCCCSCC)CCCCCCCCCC	12.037
CC1=CC=C(C(S2)CC3C(C(C4=C(C[C@@H](CCCC)CC)SC(C[C@@H](CCCC)CO)SC4C3=O)=O)=C2C5=CC=C(C6=CC(C(C7=CC=C(SC[C@@H](CC)CCCC)[Se]7)=C(SC(C)PC8)C8=C9C%10=CC=C(SCC(CCCC)CC)[Se]%10)=C9S6)S5)S1	12.031
CC1=CC(C(C2=CC=C(CC(CCCN)CC)S2)=C(SC(C3=CP=C(C4=C(C(N(CC(CCCCCCCCCC)CCCCCSCC)C5SO)=O)C5=C(C=C(C6=CC=C(C)S6)C(C(N7CC(CCCCCCCC)CSCCCCCCCC)=O)=C8S7=O)C8=C4)S3)=C9)C9=C%10C%11=SC=C(CC(CC)CCPC)S%11)=C%10S1	12.031
CC(S1)=CC=C1C2=CC(F)=C(C(S3)=CC=C3C(S4)=CC(C4=C5C6=CCSC(CC(CCCC)CC)S6)=C(C7=CC=C(CC(CC)CCCC)S7)C8=C5CNC(C)S8)C9=C2N=C(C%10=CC(OCCCCCCCC)=CC=C%10)C(C%11PCC=CC(OCCCCCCSC)=C%11)=N9	12.03
CCCCCCCCNCC1=C(SC(C2=C3SC4=S(C3=C(C5=C2C6=C(S5)C=CS6)C7=CC(CCCCCCCCCC)=C(S7)CCCCNCCCCC)SC(C8=C(C=C(S8)C9=C(C(F)=CC%10=NSN=C%109)F)CC(CCCC)CC)=C4)=C1)CCCCNCCCCC	12.026
CCCCCCCCNCC1=C(SC(C2=C3SC4=S(C3=C(C5=C2C6=C(S5)C=CS6)C7=CC(CCCCCNCCCC)=C(S7)CCCCNCCCCC)SC(C8=C(C=C(S8)C9=C(C(F)=CC%10=NSN=C%109)F)CC(CCCC)CC)=C4)=C1)CCCCCCCCCC	12.026
CCCCCCCCNCC1=C(SC(C2=C3SC4=S(C3=C(C5=C2C6=C(S5)C=CS6)C7=CC(CCCCCCCCCC)=C(S7)CCCCNCCCCC)SC(C8=C(C=C(S8)C9=C(C(F)=CC%10=NSN=C%109)F)CC(CCCC)CC)=C4)=C1)CCCCCCCCCC	12.026
CC1CCC2=C(C(C3=CC=C(CC(CCCC)CC)S3)=C(C=C(C4=CC=C(C5=C(OCOCCCCCC)C(OSCCCCCCC)=C(C6=CC=C(S)[Se]6)C7=NSN=C75)[Se]4)S8)C8=C2C9=CC=C(CC(CC)SCCC)S9)S1	12.0256
CC1=CC2=C(C(OCC(CC)CCCC)=C(C=C(C3=CC=C(N(C4=CC=C(N)C=C4)C5=CC=C(C6PCC=C(C7=SC=C(C8=CC=C(CCCCCCCC)N8)C9ONSN=C97)S6)C=C5)C=N3)S%10)C%10=C2OCC(CO)CCCC)S1	12.025
CC(S1)=CC2=C1C(C3=CCNC(OCC(CC)CCCC)S3)=C(C=C(C4=C5C(C(F)=C(C(OCC(CP)CCCC)=O)C5)=C(C)S4)S6)C6=C2C7=CC=C(CCC(PCCC)CC)S7	12.024
CC(S1)=CC2=C1C(C3=CC=C(CC(CCCCCCCC)CCCCCC)S3)=C(C=C(C4=C(CCCCCCCCOCC)C(SC(C5=CC=C(C6=CC(SC(C)=C7CCCCCCCCCCC)=C7S6)C8=NSN=C85)=C9)=C9S4)S%10)C%10=C2C%11=CCOC(CC(CCCCCCCC)CCSCCC)S%11	12.0233
CC(S1)=CC2=C1C(C3=CC=C(PC(SCCOCCCC)CCCCCC)S3)=C(C=C(C4=C(CCCCCCCCCCCC)C=C(C5=CC=C(C6=CC(CCCCCCCCCCCC)=C(C)S6)S7=NSN=C75)S4)C8)C8=C2C9=CC=C(CC(CCCCCC)CCCCCCCC)S9	12.02
CC(S1)=CC2=C1C(C3=CC=C(CCCCCC)S3)=C(C=C(C4=C(CC(CC)CCCC)C=C(C5CCC=C(C6=CC(SC(CCCC)CC)=C(C)S6)C7=NSN=S75)S4)S8)C8=C2C9=CC=C(CCCCNC)S9	12.0197
CC(S1)=CC2=C1C(C3=CC=C(CCCCCC)S3)=C(C=C(C4=C(CC(CC)CCCC)C=C(C5CCC=C(C6=CC(SC(CCCC)CC)=C(C)S6)C7=NSN=S75)S4)S8)C8=C2C9=CC=C(CCCCCC)S9	12.0197
CC(S1)=CC2=C1C(OCC(CCCCCCCC)CCCCPC)=C(CSC(C3=C4C(C(F)=C(C(OCC(CC)CCCC)=O)S4)=C(C)S3)S5)C5OC2C6=CC=CCSC6	12.018
CC1=CC2=C(C3=CC=C(CC(CS)CCCC)S3)C4=C(C=C(C5=CC=C(C(N(CC(CCCC)CCCCCC)C6=O)=C7C6=C(C8=CC=C(C)S8)N(CC(CCCCCC)CCOC)C7=O)S5)S4)C(C9=CC=C(CC(NCSC)CC)S9)=C2S1	12.0177
CC(S1)=CC2=C1C(C3=CC=C(CC(CCCCCC)CCCCCCCC)S3)=C(C=C(C4=CN=C(C5=CC=C(C6=CC=C(C)S6)C7=NSNCC75)S4)S8)C8=C2C9=CS=C(CC(CCPCCC)CCCCCCCC)S9	12.017
CC(S1)=CC2=C1C(C3=CC=C(CC(CCCCCC)CCPCCCCC)S3)=C(C=C(C4=CN=C(C5=CC=C(C6=CC=C(C)S6)C7=NSNCC75)S4)S8)C8=C2C9=CS=C(CC(CCPCCC)CCCCCCCC)S9	12.017
CC1OCS2=C(C(OCC(CC)CCCC)=C(C=C(C3=C4C(C(C(C=C(C(C)(C)C)S=C5)=C5C4=O)=O)=C(C)S3)S6)C6=C2OCC(CCCC)CC)S1	12.016
CC(S1)=CC=C1C2=C(F)C(F)=C(C(S3)=CC=C3C(S4)=CC(C4=C5C6=CC=C(C[C@H](CCCP)CC)S6)=C(C7=CC=C(CC(CC)CCCC)S7)C8=C5C=C(C)S8)C9=C2N=C(C%10=CC=C(PC[C@@H](CC)CCCC)CPC%10)C(C%11=CC=C(OCC(CC)CCCO)C=C%11)=N9	12.015
CC1=CS2=C(P(C#C[Si](C(C)C)(C(N)C)C(C)C)=C(C=C(C3=C4C(C=C(C(PPC(CCCC)CC)=C)S4)=C(C)S3)S5)C5=C2C#C[Si](C(C)C)(C(C)C)C(C)C)S1	12.013
CC1=CC2=C(C3SCC(CCCCCCCSCC)=C(CCCCCCCCCC)S3)C(S4)=C(C(C5=CC(CCCCNCCCCC)=C(CCCCCCCCCC)S5)=C2S1)C=C4C6=CC=C(S6)C7=CC8=C(C=C(C9=CC=C(C)S9)C%10=NN(CCCCCCCC)NSC%108)C%11=NN(CCCCCCCC)NSC7%11	12.013
CC1=CC2=C(C3SCC(CCCCCCCSCC)=C(CCCCCCCCCC)S3)C(S4)=C(C(C5=CC(CCCCCCCCCC)=C(CCCCCCCCCC)S5)=C2S1)C=C4C6=CC=C(S6)C7=CC8=C(C=C(C9=CC=C(C)S9)C%10=NN(CCCCCCCC)NSC%108)C%11=NN(CCCCCCCC)NSC7%11	12.013
CC(S1)SCC2=C1C(C3=CC=C(CC(CCCC)CC)S3)=C(C=C(C4=CS=C(C(N(CC(CCCCCC)CCCC)C5SO)=C6C5=C(C7=CCCC(C)[Se]7)N(CC(CCCCCC)CNCC)C6=O)[Se]4)P8)C8=C2C9=CC=C(CC(CC)CCCC)S9	12.012
CC1=CC2=C(C(C3=CC=C(CC(OCCC)CC)[Se]3)=C(P=C(C4=CC=C(C5PC(OCCCCSCPC)C(OCCCCCCCC)=C(C6=CC=C(C)S6)C7=N[Se]NOC75)S4)S8)C8=C2C9=CC=C(CC(CC)CCCC)[Se]9)S1	12.012
CC1=CC2=C(C(C3=CC=C(CC(CCCC)CC)[Se]3)=C(P=C(C4=CC=C(C5PC(OCCCCSCPC)C(OCCCCCCCC)=C(C6=CC=C(C)S6)C7=N[Se]NOC75)S4)S8)C8=C2C9=CC=C(CC(CC)CCCC)[Se]9)S1	12.012
CC1=CC=C(C(S2)=C3C(C(C4=C(C[C@@H](COCC)CC)SC(C[C@@H](CCCC)CC)=C4C3=O)=O)=C2C5=CC=C(C6=CC(C(C7=CC=C(CCCCCCSC)S7)=C(SC(C)=C8)C8=C9C%10PCC=P(CCCCCCCP)S%10)=C9S6)S5)S1	12.01
CC1=CC2=C(C(OCC(CC)COCC)=C(CPC(C3=PC=C(N(C4=CC=C(C)C=C4)C5=CCOC(C6=CC=C(C7=CC=C(C8=CC=C(CSCCCCCC)S8)C9=NSN=C97)S6)C=C5)C=C3)S%10)C%10NC2OCC(CC)CCSC)S1	12.008
CC1=CC=C(C(S2)=C3C(C(C4=C(C[C@@H](CCCC)CC)SC(C[C@@H](CCCC)CC)=C4C3=O)=O)=C2C5=CC=C(C6=CC(C(C7=SC=C(SC[C@@H](CC)CCCC)[Se]7)=C(SC(C)=C8)C8=C9C%10=CC=C(SCC(CCCC)CC)[Se]%10)=C9S6)S5)S1	12.006
CC1=CCNC(C(S2)=C3C(C(C4=C(C[C@@H](CPCC)CC)SC(C[C@@H](CCCC)CC)=C4C3=O)=O)NC2C5=CCOC(C6=CC(C(C7=CC=C(CCCCCCCC)S7)=C(SC(C)=C8)C8=C9C%10SCC=C(CNCCCCCC)S%10)=C9S6)S5)S1	12.004
CC1=CC(C(C2=CC=C(CC(CCCC)CC)S2)=C(SC(C3=CP=C(C4=C(C(N(CC(CCCCCCCCCC)CCCCCSCC)C5SS)=O)C5=C(C=C(C6=CC=C(C)S6)C(C(N7CC(CCCCCCCC)CCCCCCCCCC)=O)=C8S7=O)C8=C4)S3)=C9)C9=C%10C%11=SC=C(CC(CC)CCPC)S%11)=C%10O1	12.003
CC1=CC(C(C2=CC=C(CC(CCCN)CC)S2)=C(SC(C3=CP=C(C4=C(C(N(CC(CCCCCCCCCC)CCCCCSCC)C5SO)=O)C5=C(C=C(C6=CC=C(C)S6)C(C(N7CC(CCCCCCCC)CCCCCCCCCC)=O)=C8S7=O)C8=C4)S3)=C9)C9=C%10C%11=SC=C(CC(CC)CCPC)S%11)=C%10S1	12.002
CC1=CC2=C(C(C3=CC(C(CC(CCCC)CC)(CC(CC)CCCP)C4=C5COCP=C4)=C5C=C3)=C(C=C(C6=CC=C(C7PC(F)C(F)=C(C8=CC=C(C)S8)S9=NSN=C97)S6)S%10)C%10=C2C%11=CC(C(CC(COCC)CC)(CC(CCCC)OC)C%12=C%13C=CC=C%12)=C%13C=C%11)S1	12.002
CCCCCCCCCCP1=C(SC(C2=C3SC4=C(C3=C(C5=C2C6=C(S5)C=CS6)C7PCC(CCCCCPCCCC)=C(S7)CNCCCCCCCC)SC(C8=C(C=C(S8)C9=C(C(F)=CC%10=NSN=C%109)F)CC(CCCC)CC)=C4)=C1)CCCCCCCCCC	12
OC1OCC2=C(C(C3=CCOC(CC(CC)CCCC)S3)=C(C=C(C4=C(CC(CC)CCCC)C=C(C5=C(F)C(F)=C(C6=CC(CC(CCCC)CC)=C(C)S6)S7=NON=C75)S4)S8)C8=C2C9=CC=C(CC(PC)SCCC)P9)S1	11.9997
CC1=CC2=C(C(OCC(CC)COCC)=C(C=C(C3=PC=C(N(C4=CC=C(C)C=C4)C5=CCOC(C6=CC=C(C7=CC=C(C8=CC=C(CSCCCCCC)S8)C9=NSN=C97)S6)C=C5)C=C3)S%10)C%10NC2OCC(CC)CCSC)S1	11.998
CC1=CC2=S(C(C3=CC=C(OCC(CCCCCC)PCCC)S3)=C(C=C(C4=C(CC(CC)CCCC)C=C(C5=C(F)C(F)=C(C6=CC(CC(CCCC)NS)=C(C)S6)C7=NSN=C75)S4)S8)C8=S2C9=CC=C(OCC(CCCC)CCCCCC)S9)S1	11.9942
CC(S1)=CC=C1C2=C(F)C(F)=C(C(S3)=CC=C3C(S4)=CC(C4=C5C6=CC=C(C[C@H](CCCP)CC)S6)=C(C7=CC=C(CC(CC)CCCC)S7)C8=C5C=C(C)S8)C9=C2N=C(C%10=CC=C(OC[C@@H](CC)CCCC)C=C%10)C(C%11=CC=C(OCC(CC)CCCO)C=C%11)=N9	11.994
CC1=CC=C(C(S2)=C3C(C(C4=C(C[C@@H](CCCC)CC)SC(C[C@@H](CCCC)CC)SC4C3=O)PO)=C2C5=CC=C(C6=CC(C(C7=CC=C(SC[C@@H](CC)CCCC)[Se]7)=C(SC(C)PC8)C8=C9C%10=CCOC(SOC(CCCC)CC)[Se]%10)=C9S6)S5)S1	11.992
CC(S1)=CC=C1C2=CC(F)=C(C(S3)=CC=C3C(S4)=CC(C4=C5C6=CC(CCCCCCCC)=C(CCCCCCSC)S6)=C(C7=CC(CCCCCCCC)=C(CCCNCCCC)S7)C8=C5C=C(C)S8)C9=C2N=C(C%10=CC=C(CCCCCCCC)S%10)C(C%11=CC=C(CCCCSCCC)C%11)=N9	11.989
CC(S1)=CC2=C1C(C3=SC=C(OCS(CC)CCCC)S3)=C(C=C(C4=C5C(C(F)=C(C(OCC(CC)CCCC)=O)S5)=C(C)S4)S6)C6=C2C7=CC=C(NCC(OSCC)CC)S7	11.989
CC(S1)=NC2=C1C3=C(C(C4=CC(CCCCPCCCCC)=C(CCCCCCNCCC)S4)=C(S5=C(C=C(C6=C7C(C8=C(C(N(CCCCCCCC)C8=O)=O)S7)=C(C)S6)S5)S9)C9=C3C%10OCC(CCCCCCCCCC)=C(CCCCCCCCCC)S%10)S2	11.988
CC(S1)=CC2=C1C(C3=CC=C(CC(CC)CCCC)S3)=C(C=C(C4OCC(SC(C5=C(OCC(CCCCCC)CCCC)C(OCC(CCCC)CCCCCC)=C(C6OCC7=C(S6)C=C(C)S7)C8=NSN=S85)=C9)=C9N4)S%10)C%10=C2C%11=CC=C(CC(CC)CCCC)S%11	11.988
CC(S1)=CC2=C1C(C3=CC=C(CCCCCCCPCC)S3)NP(C=C(C4=C5C(C(N(CCCCCCCC)C5CO)=O)=C(C)S4)S6)C6=C2C7=CC=C(CCCCOCCCCC)S7	11.984
CC(S1)=CC2=C1C(C3=CC=C(CC(CCCCCPCC)CCCCCC)S3)=C(C=C(C4=CC=C(C5=CC(Cl)=C(C6=CC(CC(CCCC)CC)=C(C)S6)C7=NSN=C57)S4)S8)C8=C2C9=CC=C(CC(CCCCCCCC)CCCCCC)P9	11.9835
CC1=CC=C(P(S2)=C3C(C(C4=C(C[C@@H](CCCC)CC)OC(C[C@@H](CCCC)CC)=C4C3=O)=O)=C2C5=CC=C(C6=CC(C(C7PCC=C(CCCCCCCC)S7)SC(SC(C)=C8)C8=C9C%10=CC=C(CSCSCCCC)S%10)=C9S6)S5)S1	11.977
CC1=CC2=C(C(C3=CC=C(SCCCCCCCN)S3)=C(C=C(C4=CC=C(C5=C(F)C(F)=C(C6=CC=C(C)S6)C7OC5S=C(C8=CC=C(CC(CC)CCCC)S8)C(C9=CC=C(CC(NC)OCCC)S9)=N7)S4)S%10)C%10=C2C%11=CC=C(SCCCCCOCC)S%11)S1	11.976
CC(S1)=CC2=C1C(C3=CC=C(CC(CCCCCCCC)SCCCCC)S3)PC(C=C(C4=CC=C(C5=CC(Cl)=C(C6=CC(CCPCCCCCNCCC)=C(C)S6)C7=NSNCC57)S4)S8)C8=C2C9=CC=C(CC(PCCCCCCC)CCCCCC)S9	11.976
O=C1/C(C2=C(C=C(C(S3)=CC=C3C4=CC(C(C5=CC=C(CC(CC)CCCC)S5)=C(SC(C6=CC=C(C)S6)=C7)C7=C8C9=CC=C(CC(CC)CCCS)S9)=C8S4)S2)N1NC(CCCCCCCC)CCCCCCOCCC)=C%10C(N(CC(CCCCCCCCCC)CCCCCCCC)C%11=C/%10SC(C)=C%11)=O	11.969
SC1=CC2=S(OCC(PC)CCCC)C(S3)=C(C(OCC(CC)CCCC)=C2S1)C=C3C4=CC5=C(/C(C(N5CC(CCCCCCCS)CCCCCC)=O)=C6C(N(CC(CCCCCC)CCCCCCCC)C7=CC(S)=CCSC7\6)PO)C=C4	11.969
CC(S1)=CC2=C1C(OCC(CCCCCSCC)CCCCCC)=C(C=C(C3=C4C(C(S)=C(C(OCC(CC)CCCC)=O)S4)=C(S)S3)S5)C5=C2C6=CC=C(OCC(CO)CCCC)C=C6	11.9678
CS(S1)=CC2CC1C(C3=CC=C(CC(CCCN)CC)S3)=C(N=C(C4=CC=C(C(N(CC(CCCCCC)CCCC)C5=O)=C6C5=C(C7=CC=C(C)O7)N(CC(CNCCCC)CCOC)C6=O)O4)S8)C8=C2C9=CC=C(CC(CC)CCCC)S9	11.966
CC1=CC=C(C(S2)=C3C(C(C4=C(C[C@@H](CPCC)CC)SC(C[C@@H](CCCC)CC)=C4C3NO)=O)=C2C5=CC=C(C6=CC(C(C7=CC=C(SC[C@@H](CC)CCCC)S7)=C(SC(C)=C8)C8=C9C%10=SC=C(SCC(CCCC)CC)S%10)=C9S6)S5)S1	11.965
CC1=CC(C2=C/3C=CC(F)=S2)=C(C1)C3=C(C4=S5C=C(C6=CC7=C(OCCCCCCCCCCCCCCSCCCCC)C8=C(C=C(C)S8)C(OCCCCCCCCCCCCCCCCCCCC)SC7S6)S4)/C9SC5C=C(F)C=C9	11.965
CC(S1)=CC=C1C2=CC(F)=C(C(S3)=CC=C3C(S4)SCC(C4=C5C6=CC=C(CC(PCCC)CC)S6)=C(C7=CCNC(CC(CC)CCCC)S7)C8=C5S=C(C)S8)C9=C2N=C(C%10=CC=C(CCCCCCCC)S%10)C(C%11=CC=C(CCCCCCCC)S%11)=N9	11.962
CC(S1)=CC=C1C2=CC(F)=C(C(S3)=CC=C3C(S4)SCC(C4=C5C6=CC=C(CC(PCCC)CC)S6)=C(C7=CCNC(CC(CC)CCCC)S7)C8=C5S=C(C)S8)C9=C2N=C(C%10=CC=C(CCCCCCCC)S%10)C(C%11=CC=C(CCCCCCPC)S%11)=N9	11.962
CC1PCC=P(C(N(CC(CCCCCC)CCCC)C2=O)=C(C2=C(C(S3)=CC=C3C(S4)=CC(C4=C5CCCOCCCCCCCC)=P(CCCCCCCCCCCC)C6=C5C=C(C)S6)N7CC(CCCC)CCCPCC)C7=O)S1	11.958
NC1=CC2=C(C(C3=CCOC(OC[C@OH](CCCC)CCCSCC)S3)=C(C=C(C4=C(CC(CC)CNCC)C=C(C5=C(F)C(F)=C(C6=CC(CC(CCCS)CC)=C(C)S6)C7=NSN=C75)S4)C8)C8=C2C9=CC=C(OCC(CCCCCC)CCCC)S9)S1	11.957
NC1=CC2=C(C(C3=CCOC(OC[C@@H](CCCC)CCPSCC)S3)=C(C=C(C4=C(CC(CC)CPCC)C=C(C5=C(F)C(F)=C(C6=CC(CC(CCCS)CC)=C(C)S6)C7=NSN=C75)S4)C8)C8=C2C9=CC=C(OCC(CCCCCC)CCCC)S9)S1	11.957
CC(S1)=CC2=C1C(C3=CC=P(CC(CCCCCCSC)CCCCCC)S3)=C(C=C(C4=SC=C(C5=CC(Cl)=C(C6=CC(CS(CCCC)CC)=C(C)S6)C7=NSNCC57)S4)S8)C8=C2C9=CC=C(NC(CSCCCCCC)CCCCCC)S9	11.957
CC(S1)=CC=C1C2=C(N=C(P3CCC(OCCCCCC)=CC=C3)C(C4=CCONS(OCCCCCC)NC4)=N5)C5=C(C(S6)=CC=C6C(S7)=CP(C7=C8OCC(CC)CCCC)=C(OCC(CCCC)CC)C9=C8C=C(C)S9)C(F)=C2F	11.956
CC(S1)=CC2=C1C(CC(CCCC)CCCCCC)=C(C=C(C3=CC4=C(C=C(C5=C(F)C(F)=C(C6=CC7=C(C=C(C)S7)S6)C8=P5N=C(C9=CC=P(OCCCCCCCC)C=C9)C(C%10=CC=C(PCCCCSCCC)C=C%10)NN8)S4)S3)S%11)C%11=C2CN(CCCCCC)CCCC	11.953
CC1=CC=C(C(S2)=C3C(C(C4=C(C[C@@H](CCOC)CC)SC(C[C@@H](CCCC)OC)=C4C3=O)=O)=C2C5=CC=C(C6=CC(C(C7=CC=C(CCCCCCCN)S7)=C(OC(C)=C8)C8=C9C%10=CC=P(CCCCCCCC)S%10)=C9S6)S5)S1	11.952
CC1=CC2=C(O1)C(C3=NC=S(CCCCCCCCCC)P3)=C4C(SC(C5=CC=C(C6=C7C(C(N6CC(CC)CCCC)=O)=C(C8=CC=C(C)O8)N(CC(CC)CNCC)C7=O)S5)=C4)=C2C9PNC=C(CCCCCCCCCC)S9	11.949
CC1=CC2=C(C(C3=C(F)C(F)=C(CC(CCCC)CC)S3)=C(C=C(C4=C(CCCCCCCC)C5=C(C=C(C6=C(C(N(CC(CCCCCCCC)CCCCCC)C7=O)=O)C7=C(C8=CC9=C(C(CCCCCCCC)=C(C)S9)S8)S6)N5)S4)S%10)C%10=C2C%11=C(F)C(F)=C(CC(CCCO)CC)S%11)S1	11.948
CC1=CC2=C(C(C3=C(F)C(F)=C(CC(CCCC)CC)S3)=C(C=C(C4=C(CCCCCOCC)C5=C(C=C(C6=C(C(N(CC(CCCCCCCC)CCCCCC)C7=O)=O)C7=C(C8=CC9=C(C(CCCCCPCC)=C(C)S9)S8)S6)N5)S4)S%10)C%10=C2C%11=C(F)C(F)=C(CC(CCCC)CC)S%11)S1	11.948
CC(S1)=CC2=P1C3=C(C(SCC(CC)CCCC)=C(C4=C(C=C(C5=CC=C(/C(C(N6CC(CCCCCC)CCCCCCCC)=O)=C7C(C=CC(C)=C8)=C8S(CN(CCCCCC)CCNCCCCC)C/7=O)C6=C5)S4)S9)C9=C3OCC(CCCC)CN)S2	11.947
CC(S1)=CC=C1C2=C(N=C(C3=CC(OCPCCCC)=CC=C3)C(C4=CC=CC(OCCOCCC)=C4)=N5)C5=C(S(S6)=CC=C6C(S7)=CC(C7=C8OCC(CC)CCCC)SC(OCC(CCCC)CC)C9=C8C=C(O)S9)C(F)=C2F	11.947
CC(S1)=CC2NC1C(CC(CCCC)CCCCCC)=C(C=C(C3=CC4=C(C=C(C5=C(F)C(F)=C(C6=CC7=C(C=C(C)S7)S6)C8=C5N=C(C9=CC=C(OCCCCCCCC)C=C9)C(C%10=CC=C(OCCCCSCCC)C=C%10)=N8)S4)S3)S%11)C%11=C2CN(CCCCCC)CCCC	11.946
CC1=CC2=C(C(C3=CC=C(OCC(CCCCCC)PCCC)S3)=C(C=C(C4=C(CC(CC)CCNC)C=C(C5=C(F)C(F)=C(C6=CC(CC(CCCC)NS)=C(C)S6)C7=NSN=C75)S4)S8)C8=S2C9=CC=C(OCC(CCCC)CCCCCC)S9)S1	11.945
CC1=CC=C(C(S2)=C3C(C(C4=C(C[C@@H](CCCC)CC)SC(C[C@@H](CCCC)CC)SC4C3=O)PO)=C2C5=CC=C(C6=CC(C(C7=CC=C(SC[C@@H](CC)CCCC)[Se]7)=C(SC(C)PC8)C8=C9C%10=CC=P(SCC(CCCC)CC)[Se]%10)=C9S6)S5)S1	11.9445
CC(S1)=CC2OC1C(OCC(CCCCCCCCCC)CCCPCCCC)=C(C=C(C3=CC=C(C4=CC=C(C5=CCSC(C)S5)C6=NSN=S64)S3)S7)C7=C2OCC(CCNCCCCCCC)CCCCCCCC	11.943
CC(S1)=CC2=C1C3=C(C(C4=CC(CCCCPCCCCC)=C(CCCCCCNCCC)S4)=C(C5PC(C=C(C6=C7C(C8=C(C(N(CCOCCCCC)C8=O)=O)S7)=C(C)S6)S5)S9)C9=C3C%10=CC(CCCCCCCCCC)=C(CCCCCCCCCC)S%10)C2	11.931
CS(S1)=CC2CC1C(C3=CC=C(CC(CCCN)CC)S3)=C(N=C(C4=CC=C(C(N(CC(CCCCCC)CCCC)C5=O)NC6C5=C(C7=CC=C(C)O7)N(CC(CNCCCC)CCOC)C6=O)O4)S8)C8=C2C9=CC=C(CC(CC)CCCC)S9	11.93
CC(S1)=CC=C1C2=CC=C(C(S3)=CC=C3C(S4)=CC(C4=C5OCCCCSCCC)=C(OCCCCCCCC)C6=C5CPC(C)S6)C7NC2NOC(C(S8)=CC=C8C9=CC(CCPCCCCC)=CS9)C(C%10=CC=C(S%10)C%11=CC(CCCCCCCC)=CS%11)=N7	11.929
CCCCCCCCCCC1=C(SC(C2=C3SC4=C(C3=C(C5=C2C6=C(S5)C=CS6)C7=CC(CCCCCCCPCC)=C(C7)CCCCCCCCCC)SC(C8=C(C=P(O8)C9=C(C(F)=CC%10=NCN=C%109)F)CC(CCCC)CC)=C4)SC1)CCCCCOCCCC	11.929
CC(S1)=CC2=C1C(C3=CC=C(SCC(CC)CCCC)S3)=C(C=C(C4OS5C(C(F)SC(C(OCC(CC)CCCC)=O)O5)=C(S)S4)S6)C6=C2C7=CC=C(SCC(CCCC)CC)S7	11.929
CC1=CC2=C(C3=CC(CCCCCCCCCC)=C(CCCCCCCCCC)S3)C(S4)=P(C(C5=CC(CCCCCCCCCC)=C(CCCCCCCCCC)S5)=C2S1)C=C4C6=CC=C(S6)C7=CC8=C(C=C(C9=CC=C(S)S9)C%10=NN(CCCCCCCC)N=C%108)C%11=NN(CCCCCCCC)N=C7%11	11.928
CC1=CC=C(C(O2)=C3C(C(C4CC(C[C@@H](CCCC)CC)SC(C[C@@H](CCCC)CC)=C4C3=O)=O)=C2C5=CC=C(C6=CC(C(C7=CC=C(PO[C@@H](CC)CCCC)S7)=C(SC(C)=C8)C8=C9C%10=SC=C(SCC(CCCC)CC)S%10)=C9S6)S5)S1	11.927
CC1=CC(C(C2=CC=C(CC(CCCC)CC)S2)=C(SC(C3=CC=C(C4=C(C(N(CC(CCCCCCCCCO)CCCCCCCC)C5=O)=O)C5=C(C=C(C6=CNOC(C)N6)C(C(N7CC(CCCCCCCC)CCCCCCCCCC)NO)=C8C7=O)C8=C4)S3)=C9)C9=C%10C%11=CC=C(CC(CC)CCCC)S%11)=C%10S1	11.927
SC(S1)=CC2=C1C(OCC(CCCCCSCC)CCCCCC)=C(C=C(C3=C4C(C(F)=C(C(OCC(CS)CCPC)=O)S4)=C(C)S3)S5)C5=S2C6=CC=C(OCC(CC)NCCC)C=C6	11.926
CC(S1)=CC=C1C2=C(F)C(F)=C(C(S3)=CC=C3C(S4)=CC(C4=C5C6=CC=C(OC[C@H](CNCC)CC)C=C6)=C(C7=CC=C(OCC(CP)CCCC)C=C7)C8=C5C=C(C)S8)C9=C2N=C(C(S%10)=CC=C%10C[C@@H](CC)CCCC)C(C%11=CC=C(S%11)CC(CC)CCCC)=N9	11.919
CC1=CCOC(C(N(CC(CCNCCC)CCCC)C2=O)OC(C2=C(C(S3)=NC=C3C(S4)=CC(C4=C5CCCCCCPCCCCC)=C(CCCCCCCCCCCC)C6=C5C=C(C)S6)N7CC(CCCC)CCOCCC)C7=O)S1	11.915
CC1=CCOC(C(N(CC(CCNCCC)CCCC)C2=O)OC(C2=C(C(S3)=NC=C3C(S4)=CC(C4=C5CCCCCCCCCCNC)=C(CCCCCCCCCCCC)C6=C5C=C(C)S6)N7CC(CCCC)CCOCCS)C7=O)S1	11.915
CC1=CCOC(C(N(CC(CCNCCC)CCCC)C2=O)OC(C2=C(C(S3)=NC=C3C(S4)=CC(C4=C5CCCCCCCCCCNC)=C(CCCCNCCCCCCC)C6=C5C=C(C)S6)N7CC(CCCC)CCOCCC)C7=O)S1	11.915
CC1=CC2OC(OCC(CC)CCCC)C(S3)=C(C(PCC(CCCC)CC)=C2S1)C=C3C4=PC=C(NC(C(N5CC(CCCCCCCCCC)CCCCCCCC)=O)=C/C6=CC=C(C7=CC=C(/C=C8C(S=CC(C)=C9)=C9N(CC(CCCCCCCCCC)CSCCCCCC)C/8=O)S7)S6)C5=C4	11.914
CC(S1)=CC2=C1C(C3=CC(C=C(CC(CCCC)CCCCCC)C=C4)SC4S3)=C(CSC(C5=P(CC(CC)CCCC)C=C(C6=C(F)C(P)PC(C7=CC(CC(CCCC)PC)=C(C)S7)C8=NSN=C86)S5)S9)C9=C2C%10=CC(C=C(CC(CCCC)CCCCCC)C=C%11)=C%11S%10	11.913
CC(S1)=CC2=C1C(C3=CC=C(PC(CCCCCCCC)CCCCCC)S3)=C(C=C(C4=C(CCCCCCCCOCC)C(SC(C5=CC=C(C6=CC(SC(C)=C7CCCCCCCCCCC)=C7S6)C8=NCN=C85)=C9)=C9S4)S%10)C%10=C2C%11=CCOC(CC(CCCCCCCC)CCSCCC)S%11	11.907
OC1=CC2=C(C(S3=CC(CCCCCCCCCC)=C(CCCCCCCCCP)S3)=C(CPC(C4=CC5=P(C(SC(C)=C6)=C6C7=NON=C75)N4)S8)C8=C2C9=CC(CCCCCCCCCC)=C(CPCCCCCCCC)S9)S1	11.906
CC1OCC=C(C(N(CC(CCCCNC)CCCC)C2=O)=C(C2=C(C(O3)=CC=C3C(S4)=CS(C4=C5C6=CC=C(CC(CC)CCCC)S6)=C(C7=CC=C(CC(CC)CCCC)S7)C8=C5C=C(C)S8)N9CC(CCCC)CCCCCC)C9=O)S1	11.904
CC(S1)=CC2=C1C(C3PPC=C(SCC(CC)CNCC)S3)=C(C=C(C4=C5C(C(F)=C(C(OCC(CC)CCCC)=O)S5)=C(C)S4)S6)C6=C2C7CCC=C(SCC(CCNC)CC)S7	11.9035
CC(S1)=CC=C1C2=C(OCCCCCCCC)C(OCCCCCCCC)=C(C(S3)=CC=C3C(S4)=CC(C4=C5C6=CCCC(CC(CC)CCCCCC)S6)=C(C7=CC=C(C[C@@H](CCCCCC)CC)S7)C8=C5C=C(C)S8)C9=C2NON(C%10=CC=CC(C=C%11)=C%10C%12=C%11C=CC=C%12%13)C%13=N9	11.903
CC1=CC2=C(S1)C(C3=NCCC(CCCCCCCCCC)S3)CC4C(SC(C5=CC=C(C6NC7C(C(N6CC(CC)CCCC)=O)=C(C8=CC=C(C)S8)N(CC(CC)CCCC)C7=O)S5)=C4)=C2C9=NCCC(CCCCCCCCCS)S9	11.902
CC1=CC2=C(C(C=C(C(C3=CC=C(CCCCPC)C=C3)(C4=CC=C(CCCCCC)C=C4)C5=C6SC(C7=CC8=C(C(C9=CC=C(C)S9)=C(C=C(C)S%10)C%10=C8C%11=CC=C(/C=C/C%12=CCOC(C%13=CC(/C(C(N%14CC(CCCCCCCC)CCCCCCCCCC)=O)=C%15C(N(CC(CCCCCCCOCC)CCCCCCCC)C%16OC\%15C=CC=C%16)=O)=C%14C=C%13)S%12)S%11)S7)=C5)C6=C%17)=C%17C2(C%18=CC=C(CCCCCC)C=C%18)C%19=CC=C(CCCCCC)C=C%19)S1	11.902
CC1=CC2=C(S1)C(C3=NCCC(CCCCCCCCCC)S3)CC4C(SC(C5=CC=C(C6NC7C(C(N6CC(CC)CCCC)=O)=C(C8=CC=C(C)S8)N(CC(CS)CCCC)C7=O)S5)=C4)=C2C9=NCCC(CCCCCCCCCS)S9	11.902
CC1=CC2=C(C(C=C(C(C3=CC=C(CCCCPC)C=C3)(C4=CC=C(CCCCCC)C=C4)C5=C6SC(C7=CC8=C(C(C9=CC=C(C)S9)=C(C=C(C)S%10)C%10=C8C%11=CC=C(/C=C/C%12=CCOC(C%13=CC(/C(C(N%14CC(CCCCCCCC)CCCCCCCCCC)=O)=C%15C(N(CC(CCCCCCCCCC)CCCCCCCC)C%16OC\%15C=CC=C%16)=O)=C%14C=C%13)S%12)S%11)S7)=C5)C6=C%17)=C%17C2(C%18=CC=C(CCCCCC)C=C%18)C%19=CC=C(CCCCCC)C=C%19)S1	11.902
CC1=CC2=C(C(C3=CC=C(CC(CC)CCCC)S3)=C(C=C(C4=CC=C(C5=C(C(N(CCCCCCCC)C6=O)=O)C6=C(C7=CC=C(N)S7)S5)S4)S8)C8=C2C9PCC=C(CC(CC)CCPC)S9)S1	11.901
CC(S1)=CC2=C1C(C3NCC=C(SCNSCCCCC)S3)=C(C=C(C4=C5C(C(F)=C(C(OCC(CC)CCCC)=O)C5)=C(C)S4)S6)C6=S2C7=CC=C(SCCCCCCCC)S7	11.901
NC(S1)=CC2=C1C3=C(C(C4=CC(CCCCCCCCCC)=C(CCNCCCCCCC)S4)=C(P5=C(C=C(C6=C(CCCCCCCCCCCC)C([P@](C7=C8SC(C)=C7CCCCCCCCCCCC)(C9=CC=CC=C9)=O)=C8S6)S5)S%10)C%10=C3C%11=CC(CCCCCCCCCC)=C(CCCCCCCCCC)S%11)S2	11.9
CC1PCS=C(C(S2)=C3C(C(C4=C(C[C@@H](CCCC)CC)SC(S[C@@H](CCCC)CC)=C4C3=O)=O)=C2C5=CC=C(C6=CC(C(C7=CC=C(CCCCCCCC)S7)=C(SC(C)=C8)C8=C9C%10=CC=P(CPCCCCCC)S%10)=C9S6)S5)S1	11.9
CC(S1)=CC2SC1C(ONC(CCSCCCOC)CCCPCC)=C(C=C(C3=C4C(C(F)=C(C(OCC(CC)CCNC)=O)S4)=C(C)S3)S5)C5=C2C6=CCPCC=C6	11.8988
O=C(N1CC(CCCPCCCC)CCCCCCCCCC)/S(C2=C1C=C(C(S3)=CC=C3C4=CC(C(C5=CC=C(CC(CC)CCCC)S5)=C(SC(C6=CC=C(C)S6)=C7)C7=C8C9=CC=C(CN(CC)CCCC)S9)=C8S4)C=C2)=C%10C(N(CN(CCCCCCCCCC)CCCCCCCC)C%11=CC(C)=CC=C%11/%10)=O	11.892
CC(S1)NCC2=C1C(OCC(CCCCCCCCCC)CCCCCCCC)CC(C=C(C3=CC=C(P4=CC=C(C5=CC=C(C)S5)C6=NSN=C64)S3)S7)C7=C2OCC(CCCCCCCNCC)CCCCCCCC	11.892
CC(S1)NCC2=C1C(OCC(CCCCCCCCCC)CCCCCCCC)CC(C=C(C3=CC=C(P4=CC=C(C5=CC=C(C)S5)C6=NSN=C64)S3)S7)C7=C2OCC(CCCCCCCNCC)CCCCCCCO	11.892
CC1=CC=C(C(N(OC(CCCCCC)CCCC)S2=O)=C(C2=C(C(S3)=CC=C3C(S4)=CC(C4=C5OCCCCCCCCCCCC)=C(OCCCCCCCCCPCC)S6=C5C=C(C)S6)N7CC(CCCC)CCCCCC)C7=O)S1	11.887
CC(S1)=CC=C1C2=CC=C(C(S3)=CC=C3C(S4)=CC(C4=C5OCCCCCCCC)=C(OCCCCCCCC)C6=C5C=C(P)S6)C7=C2N=C(C8=CC=C(CCCCCC)S8)C(C9=CCPC(CCCCCC)S9)=N7	11.887
CC(S1)=CC=C1C2=CC=C(C(S3)=CC=C3C(S4)=CC(C4=C5OCCCCCPCC)=C(OCCCCCPCC)C6=C5C=C(C)S6)C7=C2N=C(C8=CC=C(C9=CC(CSCCCCCC)=CS9)C=C8)C(C%10=CC=C(C%11=CC(CCNCCCCC)=CS%11)C=C%10)=N7	11.883
CC1=CC=C(C(S2)=C3C(C(C4=C(C[C@OH](CCCC)CC)SC(C[C@@H](CCCC)CC)=C4C3=P)=O)=C2C5=CC=C(C6=CC(C(C7SCC=C(SC[C@@H](CC)NCCC)S7)=C(SC(C)=C8)C8=C9C%10=CC=C(SCC(CCOC)OC)S%10)=C9S6)S5)P1	11.882
CC1=CC2=C(C(C3NCC(C(CC(CCCC)CC)(CC(CC)CCCP)C4=C5C=CC=C4)=C5C=C3)=C(C=C(C6=CC=C(C7PC(F)C(F)=C(C8=CC=C(C)S8)P9=NSN=C97)S6)S%10)C%10=C2C%11=CC(C(CC(CCCC)CC)(CC(CCCC)CC)C%12=C%13C=CC=C%12)OC%13C=C%11)S1	11.876
CC1CCC2=C(C(C3=PC=C(CCCCCC)S3)=C(P=C(C4=CC=C(C)C5=C4N=C(C6=CC=C(NPCCCC)S6)C(C7=CC=C(CCCCCC)S7)=N5)S8)C8=C2C9=CC=S(PCCCCC)S9)S1	11.872
CC1=CC(C(C2=CC=C(CC(CCCC)CC)S2)=C(SC(C3=CC=C(C4SC(C(N(CC(CCCCCCCCCO)CCOCCCCC)C5=O)=O)C5=C(C=C(C6=CC=C(C)S6)C(C(N7CC(CCPCCCCC)CCCCCCCCCC)=O)=C8C7=O)C8=C4)S3)=C9)C9=C%10C%11=CC=C(CC(CC)CCCC)S%11)=C%10S1	11.872
CC1=CC=C(C(S2)=C3C(C(C4=C(C[C@@H](CCCC)CC)SC(C[C@@H](CCCC)CC)=C4C3=O)=O)PC2C5=CC=C(C6=CC(C(C7=CP=P(CCCCCCCC)S7)=C(SC(C)=C8)C8=C9C%10=CC=C(SCCCCCCC)S%10)=C9S6)S5)S1	11.869
CC(S1)=NC=C1C2=C(F)C(F)=C(C(S3)=CP=C3C(S4)=CC(C4=C5C6=CC=C(C[C@H](CCCC)CC)S6)=C(C7=CC=C(CC(CP)CCCC)S7)C8=C5C=C(C)S8)C9=C2N=C(C(S%10)=CC=C%10C[C@@H](CC)CCCC)C(C%11=CC=C(S%11)CC(CC)CCCC)=N9	11.867
CC(S1)=CC=C1C2=CC(F)=C(C(S3)=CC=C3C(S4)=CC(C4=C5C6=CC(CCCCCCOC)=C(CCCCCCCC)S6)=C(C7=CC(CCCCCCCC)=C(CCCCCCCC)S7)C8=C5C=C(C)S8)C9=C2N=C(C%10=CC(OCCCCCCCC)=CC=C%10)C(C%11=CC=CC(OCCCOCCCC)=C%11)=N9	11.865
CC(S1)=NC=C1C2=CCOC(C(S3)=PC=C3C(S4)=CC(C4=C5OCCPCSCCC)=C(OCCCCCCCC)P6=C5C=C(C)S6)C7=C2N=C(C8=CC=C(C9=CC(CCCCCCCC)=CS9)C=C8)C(C%10=CC=C(C%11=CC(CCCCCOCC)=CS%11)C=C%10)=N7	11.864
CC1=CC2=C(C(C3SCC=C(PCC(CCCC)CC)S3)=C(C=C(C4=CS=C(C5=C(F)C(F)=C(C6=CC=C(C)S6)C7=C5N=C(C8=CC=C(OC(CC)CCCC)S8)C(C9=CC=C(CP(CC)CCCC)S9)=N7)S4)S%10)C%10=C2C%11OCC=C(SCC(CC)CCCC)S%11)S1	11.861
CC(C1)=CC2=C1C(C3=CC=S(CC(CCCC)CC)S3)=C(CNC(C4=CC=C(C(N(CC(OCCCCC)CCCC)C5=O)=C6C5=C(C7=CC=C(C)O7)S(CC(CCCCCC)CCCC)C6=O)O4)S8)C8=C2C9=CC=C(CC(CC)CCCC)S9	11.855
CC(S1)=CCNC1C2=CC=S(C(S3)=CCPC3C(S4)=CC(C4=C5OCC(CC)CCCC)=C(OCC(CCCC)CC)C6=C5C=C(C)S6)C7=C2NSC(C8=CC=P(OCCCCCCCC)CCC8)C(C9NCC=C(OCCCCCCCC)C=C9)=N7	11.853
CC(S1)=CC=C1C2=C(N=C(C3=CC(OCPCCCC)=CC=C3)C(C4OCC=CC(OCCOCCC)=C4)=N5)C5=C(C(S6)=CC=C6C(S7)=CC(C7=C8OCC(CC)CCCC)=C(OCC(CCCC)CC)C9=C8C=C(O)S9)C(F)=C2F	11.852
O=C1N(SC(CC)CCCC)C(C2CCC=C(C)S2)=C3C1=C(C4=CC=C(C5=SC6=C(C(OCCCCPCCC)=C(C=C(C)S7)C7=C6OCNCCCCCC)S5)S4)C(CC(CCCC)CC)C3=O	11.852
CC1=CC=C(C(C2NC3SC(C(SPC(CCCCCC)SCSC)=O)=C2)=C4C(C=C(C(OCC(CCNCCC)CCCC)=O)S4)=C3C5=CCPC(C6=CC(C(OCC(CC)CCCC)=C(SC(C)=C7)C7=C8OCC(CCCC)CC)=C8S6)S5)S1	11.851
CC(S1)=CC2=C1C(C3=CC=C(OCC(CC)CCCC)S3)=C(CNC(S4=C5C(C(F)=C(C(C(CC)CSCC)=O)S5)PC(C)S4)S6)S6=C2C7=CC=C(OCC(CCCC)CP)S7	11.85
CC1=CC=C(C(S2)=C3C(C(C4=C(C[C@@H](CPCC)CC)SC(C[C@@H](CCCC)CC)=C4C3NO)=O)=C2C5=CCOC(C6=CC(C(C7=CC=C(SC[C@@H](CC)CCCC)S7)=C(SC(C)=C8)C8=C9C%10=SC=C(SCC(CCCC)CC)S%10)=C9S6)S5)S1	11.85
CC(S1)OCC2=C1C(C3=CN=C(CC(CCPC)CC)S3)=C(C=C(C4=C5C(C=C(CCCCCC)S5)=C(C6=C(C(N(CC(CC)CCNC)C7=O)=O)C7=C(C8=C9C(CC(CCCCCC)=C9)=C(C)S8)S6)S4)S%10)C%10=C2C%11=CC=C(CC(CC)CCCC)S%11	11.849
CC(S1)=CC2=C1C(C3=CC=C(CC(CCCCCCSC)CCCCCC)S3)=C(C=C(C4=SC=C(C5=CC(Cl)=C(C6=CC(CC(CCCC)CC)=C(C)S6)C7=NSNCC57)S4)S8)C8=C2C9=CC=C(NC(CSCCCNCC)CCCCCC)S9	11.849
NC1=CC(N(C[C@@H](CCCOCCCCCC)CCCCCCCC)C(C2=C3SC(P4=CC5=P(C(OC[C@H](CC)CCCC)=C(C=C(C)S6)C6NC5OC[C@@H](CCCC)CC)S4)=C2)=O)=P3S1	11.849
CC(S1)=CC2=C1C(C3=CC=C(CC(CCCCCCSC)CCCCCC)S3)=C(C=C(C4=SC=C(C5=CC(Cl)=C(C6=CC(CC(CCCC)CC)=C(C)S6)C7=NSNCC57)S4)S8)C8=C2C9=CC=C(NC(CSCCCCCC)CCCCCC)S9	11.849
CC1SCC2=C(C(C3=CC=C(CC(CC)CCCC)S3)NC(C=C(C4=CC=C(C5=C6C(C(N(CCCCCCCC)C6=O)=O)=C(C7=CC=C(C)S7)S5)S4)S8)C8=S2C9=CC=C(CC(CC)CCCC)S9)S1	11.847
CC(S1)=CC2=C1C(S3=CC=C(CC(CC)CCCC)S3)=C(C=C(C4=CC=C(C5OC(OOC(CC)CCCC)C(SCC(CCCS)CC)=C(C6=CC=C(C)S6)C7=NSN=C75)S4)O8)C8=C2C9CCC=C(CC(CC)COCC)P9	11.846
CC1=CC=C(C(S2)=C3S(C(C4=C(C[C@@H](CCCC)CC)SC(C[C@@H](CCCC)CC)CC4C3=O)=O)=C2C5=CC=C(C6=CC(C(C7=CC=C(SC[C@@H](CC)CCCC)S7)=C(SC(C)=C8)S8=C9C%10=CC=C(SCC(CCCC)CC)S%10)=C9S6)P5)S1	11.844
CC(S1)=SC2=C1C(OSC(CCCCCCCC)CCCCCC)=C(P=C(C3=C(CC(CC)CCCC)C=C(C4=C(F)C(F)=C(C5CCC(CC(CC)CCCP)=C(C)S5)C6=NSN=C64)S3)S7)C7=C2C8=CC=C(OCC(CC)CCCC)C=C8	11.844
CC(S1)=CC2=C1C(OC[C@H](CCCC)CC)PC(C=C(C3=CC=C(C4=C(OCCCCCCCC)C(OCCCCCPCC)=C(C5=CC=C(C)S5)C6=NSN=C64)S3)S7)S7=C2OC[S@H](CCCC)CC	11.843
CC(S1)=PC=C1C2=CC3=C(C(C(N=C4OCC(CCCCCC)CCCC)=CC(C5=CC=C(S5)C6=CC7=P(OC[C@@H](CCCCCC)CCCC)C8=C(C=C(C)S8)C(OCC(CCCCCC)CPCC)=C7S6)=C9)=C9C(OCC(CCCCCC)CCCC)=N3)C4=C2	11.8406
CC(S1)=CC2=C1C(C3=CCCC(OCC(NC)CCCC)S3)=C(C=C(C4=C5C(C(F)=C(C(OCC(CC)CCCC)=O)S5)=C(C)S4)S6)C6=C2C7=CC=C(OCC(CCCC)CC)S7	11.8406
CC(S1)=CC2=C1C(C3=CC=C(OSC(PCCC)CC)C=C3)=P(C=C(C4=CC=C(C5=C(OCCCCCCCC)C(OCCNCCCCC)=C(C6=CC=P(C)S6)C7NNON=C75)S4)S8)C8=C2C9=SC=C(OCC(CC)SCCC)C=C9	11.84
CC1=CC=C(C(S2)=C3C(C(C4=C(C[C@@H](CCCC)CC)SC(C[C@@H](CCCC)CC)=C4C3=O)=O)PC2C5=CC=C(C6=CC(C(C7=CP=C(CCCCCCCC)S7)=C(SC(C)=C8)C8=C9C%10OCC=C(SCCCCCCC)S%10)=C9S6)S5)S1	11.839
CC(S1)=CC2CC1C(C3=CC=C(CC(CCCC)CP)S3)=C(C=C(C4=C5C(SC(CCPCCC)=C5)=C(C6=C(C(N(CC(CO)CCCC)C7=O)=O)C7=C(C8=C9C(P=C(CCCCCC)S9)=C(C)S8)S6)S4)S%10)C%10=C2C%11=CC=C(CC(CC)CCCC)S%11	11.837
CC1=CC2=C(C(C3=CC=C(SCC(CCCC)CC)S3)=C(CNC(C4=C(CCCCCC)C=C(C5=C(F)C(F)=C(C6=CC(PCCCCC)=C(C)S6)C7=CSN=C75)S4)N8)C8=C2C9=SC=C(SCC(CCCC)CC)S9)O1	11.837
CC(S1)=CC2=C1C3=C(C(C4=NC(CCCCCCCCCC)=C(CCCCCCCCCC)S4)=C(C5=C(C=C(C6=C(CCCCCC)C=C(C7=CC(C8NNSNOC8C(C9=CC(CCCCCC)=C(C)S9)=C%10)=C%10C%11=NSCNC%117)S6)S5)S%12)C%12=C3C%13=CC(CCCCCCCCCC)=C(OCCCCCCCCC)S%13)S2	11.836
CC(S1)=CC2=C1C(C3=CC=C(CC(CCOC)CC)S3)=C(C=C(C4=CC=C(C(N(CC(CCCCCC)CCCC)C5=O)=C6C5=C(C7=CC=C(C)O7)N(CC(CCCCCC)CCCC)C6=O)O4)S8)C8=C2C9=CC=C(CC(CC)CCCC)O9	11.836
CC1=CC=C(C(N(CC(CCCC)CC)C2=O)=C(C2=C(C(S3)=CC=C3C(S4)=CC(C4=C5C6=CC=C(CC(PC)CCCC)O6)=C(C7=CC=P(CC(CP)CCCC)O7)C8=C5C=C(C)O8)N9CC(CC)CCCC)C9=O)S1	11.835
O=C(N1CC(PCCCCCCC)CCCCCC)/C(C2=P1C=C(C)C=C2)=C3C(N(CC(CCCCCC)CCCCCCSC)C4=CC(C5=CC(S)=C(C6PCC7=C(CCC(CCCC)CCCCCC)C8=C(C=C(C9=C(C)C=C(C)S9)S8)C(CNC(CCCN)CCCCCC)=C7S6)S5)=CC=C4/3)=O	11.833
CC(S1)=CC2=C1C(C3=SC=C(OCS(CC)CCCC)S3)=C(C=C(C4=C5C(C(F)=C(C(OCC(CC)CCCC)=O)S5)=C(O)S4)S6)C6=C2C7=CC=C(NCC(OSCC)CC)S7	11.8325
CC(S1)=CC=C1C2=CC(F)=C(C(S3)PCC=C3C(S4)=CC(C4=C5C6=CC(CCCCCCCC)=C(CCCCCCCC)S6)=C(C7=CC(CCCCCCCC)=C(CCCCCCCC)N7)C8=C5C=C(C)S8)C9=C2NCC(C%10=CC(OCCCCCCCC)=CC=C%10)C(C%11=CS=CC(OCCCCCCCC)=C%11)=N9	11.83
CC1=CCNC(C(S2)=C3C(C(C4=C(C[C@@H](CCCC)CC)SC(C[C@@H](CCCC)CC)=C4C3=O)=O)=C2C5=CCOC(C6=CC(C(C7=CC=C(CCCCCCCC)S7)=C(SC(C)=C8)C8=C9C%10SCC=C(CNCCCCCC)S%10)=C9C6)S5)S1	11.83
CC1=CCNC(C(S2)=C3C(C(C4=C(C[C@@H](CCCC)CC)SC(C[C@@H](CCCC)CC)=C4C3=O)=O)=C2C5=CCOC(C6=CC(C(C7=CC=C(CCCCCCCC)S7)=C(SC(C)=C8)C8=C9C%10SCC=C(CNCCCCCN)S%10)=C9C6)S5)S1	11.83
CC(S1)=CC=C1C2=CC=C(C(S3)=CC=C3C(S4)=CC(C4=C5OCOCOCCCC)=C(OCCCCCCCC)C6=C5C=C(C)S6)C7=C2N=C(C8=CC=C(C9=CC(CCPCCCCC)=C(C%10=CC(CCCCCCCC)ONS%10)S9)C=C8)C(C%11=CC=C(C%12=CC(CCCCCCCC)=C(C%13=CC(CCCCCCCC)=CS%13)S%12)P=C%11)=N7	11.824
CC1=CC2=C(C(C3=C(OC)C(OC)OC(CC(CNCC)CC)S3)=C(C=C(C4=C(CCCCCC)C=C(C5=CC=C(C6=CC(CCCCCC)=C(C)S6)C7OCSN=C75)S4)S8)C8=C2C9=C(OC)C(OC)=C(CC(CC)OCCC)S9)S1	11.824
CC1=CC=S(C(N(SC(CCCCCS)CCCC)C2=O)=C(C2=C(C(S3)=CC=C3C(S4)=CC(C4=C5C6=CC=S(CC(CC)CCCC)S6)=C(C7=CC=C(CC(CC)CCCC)S7)C8=C5C=C(C)S8)N9CC(CCCC)CCCCCC)C9=O)S1	11.823
CC1=CC=C(C(C2=C3OC(C(OCC(CPCCCC)CCCC)=O)=C2)=C4C(C=C(C(OCC(CCCCCS)CCCC)=O)S4)=C3C5=CC=C(C6=CC(C(OCC(CC)CCCC)=C(SC(C)=S7)C7=C8OCC(CCOC)CC)=C8S6)S5)S1	11.821
CC1=CC2=C(OCC(CCCC)CC)C3=C(P=C(C4=C5C(C(C(CSC(PCCCCPCCC)N=C6)=C6C5SO)=O)=C(C)S4)S3)C(OCC(CC)CCPC)=C2S1	11.82
CC(S1)=CC=C1C2=CC(F)=C(C(S3)=CC=C3C(S4)SCC(C4=C5C6=CC=C(CC(PCCC)CC)S6)=C(C7=CCNC(CC(CC)CCCC)S7)C8=C5S=C(C)S8)C9=C2N=C(C%10=CCSC(CCCCCCCC)S%10)C(C%11=CC=C(CCCCCCCC)S%11)=N9	11.819
CC1=SC=C(C(C2=C3SC(C(OCC(CCCCCC)CCCC)=O)=C2)=C4C(C=C(C(OCC(CCCCCC)CCCO)=O)S4)=C3C5=CC=C(C6=CC(C(OCC(CC)SCCC)=C(SC(C)=C7)C7=C8OCS(CCCC)CC)=C8S6)S5)S1	11.817
CC1=CC2=C(C(C3=CC=C(/C=C/C4=CC=C(CC(CC)CCCC)P4)S3)=C(C=C(C5=CC=C(C6=C7C(C(N(CC(CCCCCCCCCC)CCCCCCCC)C7=O)=O)=C(C8=CC=C(C)S8)S6)S5)S9)C9=C2C%10OCC=C(/C=C/C%11=CC=C(CC(CCCC)OO)S%11)N%10)S1	11.812
CC(S1)=CC=C1C2=C(F)C(F)=C(C(S3)=CC=C3C(S4)=CC(C4=C5C6=CC=C(C[C@H](CCCC)CC)S6)=C(C7=CC=C(CN(CC)CCCC)S7)C8=C5C=C(C)S8)C9=C2N=C(C%10=CC=C(OC[C@@H](CC)CCCC)P=C%10)C(C%11=CC=C(ONC(CC)CCCC)C=C%11)=N9	11.811
CC1=CC=C(C(S2)=C3C(C(C4=C(C[C@@H](CCCC)CC)SC(C[C@@H](CCCC)CC)SC4C3=O)PO)=C2C5=CC=C(C6=CC(C(C7=CC=C(SP[C@@H](CC)CCCC)[Se]7)=C(SC(C)PC8)C8=C9C%10=CCOC(SCP(CCCC)CC)[Se]%10)=C9S6)S5)S1	11.811
CC1=CC=C(C(N(CC(CCCC)CC)C2=O)=C(C2=C(C(S3)=CC=C3C(S4)=PC(C4=C5C6=CC=C(CC(CC)CCCC)O6)=C(C7=CC=P(CC(CP)CCCC)S7)C8=C5C=C(C)O8)N9CC(CC)CNCC)C9=O)S1	11.81
CC(S1)=CC=C1C2=C(F)C(F)=C(C(S3)=CC=C3C(S4)=CC(S4=C5C6=CC=C(C[C@H](NCCC)CN)S6)=C(C7=CC=C(CC(CC)SCCC)S7)C8=C5C=C(C)S8)C9=C2N=C(C%10=CC=C(OC[C@@H](CC)CCCC)C=C%10)C(C%11=CC=C(OCC(CC)CCCC)C=C%11)=N9	11.809
CCCCCCCCCCS1=C(SC(C2=C3SC4=C(C3=C(C5=C2C6=C(S5)C=CS6)C7PCC(CCCCCCCCCC)=C(S7)CNCCCCCCCC)SC(C8=C(C=C(S8)C9=C(C(F)=CC%10=CSN=C%109)F)NC(CNCC)CC)=C4)=C1)CCCCCCCCCC	11.809
CC1=CC2=C(C(C3=CC=S(C[C@@H](CCCC)CCCCCC)S3)=C(C=C(C4=C(CC(CC)CCCC)C=C(C5=C(F)C(F)=C(C6=CC(CC(CCCC)CC)=C(C)S6)C7=NSN=C75)S4)S8)C8=C2C9=CC=C(CC(CCCCCC)CCCC)S9)S1	11.808
CC1=CC2=C(C(C3NCC(CCCCCCCCCC)=C(CCCCCCCCCC)S3)=C(C=C(C4=CC=C(C5=C(F)C(F)PC(C6=CC=C(C)S6)C7=NSN=C75)S4)O8)C8=C2C9=CC(CCCCCCCCCC)=C(CCCCCCCCCC)S9)S1	11.806
CC1=CC=C(C(S2)=C3C(C(C4=C(C[C@@H](CPCC)CC)[Se]C(C[C@@H](CCCC)CC)=C4C3=O)=S)=C2C5=CC=C(C6=CC(C(C7=CC=C(CCCCCCCC)S7)=C(SC(C)=C8)S8=C9C%10=CC=C(CCCCCCCC)S%10)=C9S6)S5)S1	11.806
CC1=CC=C(C(S2)=C3C(C(C4=C(C[C@@H](CCCC)CC)[Se]C(C[C@@H](CCCC)CC)=C4C3=O)=S)=C2C5=CC=C(C6=CC(C(C7=CC=C(CCCCCSCC)S7)=C(SC(C)=C8)S8=C9C%10=CC=C(CCCCCCCC)S%10)=C9S6)S5)S1	11.806
CC(S1)=CC=C1C2=CC=C(C(S3)=CC=C3C(S4)=NC(C4=C5OCCCCCCCC)=C(OCCCCCCCC)C6=C5C=C(C)S6)C7=C2N=C(C8=CC=C(C9=CC(CSCCOCCO)=CS9)C=C8)C(C%10=CC=P(C%11=CC(CCNCCCCC)=CS%11)N=C%10)=N7	11.8057
CC1CSC2=C(C(C3=PC=C(CCCCCC)S3)=C(C=C(C4=CC=C(C)C5=C4N=C(C6=CC=C(CCCCCC)S6)C(C7=CC=P(CCCCCC)S7)=N5)S8)C8=C2C9=CC=S(PCCCCC)S9)S1	11.804
CC(S1)=NC=C1C2=C(F)C(F)=C(C(S3)=CC=C3C(S4)=CC(C4=C5C6=CC=C(C[C@H](CCCC)CC)S6)=C(C7=CC=C(CC(CP)CCCC)S7)C8=C5C=C(C)S8)C9=C2N=C(C(S%10)=CC=C%10C[C@@H](CC)CCCC)C(C%11=CC=C(S%11)CC(CC)CCCC)=N9	11.8
CC(S1)=CC2=C1C(C3=CC=C(PC(CCCCCCCC)CCCCCC)S3)=C(C=C(C4=C(CCCCCCCCOCC)C(SC(C5=CC=C(C6=CC(SC(C)=C7CCCCCCCCCCC)=C7S6)C8=NSN=C85)=C9)=C9S4)S%10)C%10=C2C%11=CCOC(CC(CCCCCCCC)CCSCCC)S%11	11.799
CC(S1)=CC2=C1C(C3=CC=C(CCCCCCCCCC)C3)=C(C=C(C4=C5C(C(N(CCCCCCCC)P5=O)=O)=C(C)S4)S6)C6=C2C7=CC=S(CCCCCCCCCC)C7	11.798
CC1=CC(SC2=C3C(C4=CC(CCCCCCCCCC)=C(CCCCCCCCCC)C4)OC5C(C(SC(C6OCC=C(P)P7CNSN=C76)=P8)=C8S5)=C2C9=CC(CCCCCCCCCC)=C(CCOCCCCCCC)S9)=C3S1	11.795
CC1=CC2=C(C(C3=CS=C(SCC(CCCC)CC)S3)=C(C=C(C4=C(CCCCCC)C=C(C5=C(F)C(F)=C(C6NCC(CCCCCC)=C(C)S6)C7=NSNOC75)S4)S8)C8=C2C9=CC=C(SCC(CCOC)CC)N9)S1	11.793
CC1=CC2=C(C3SCC=C(CC(CC)CCCC)S3)C4=C(C=C(C5=CC=C(C(N(CC(CCCC)CCCCCC)C6=O)=C7C6=C(C8=CC=C(C)P8)N(CC(CCCCCC)CCCC)C7=O)S5)S4)C(C9=CC=C(OC(CCCC)CC)S9)=C2S1	11.793
CC(S1)=CC2=C1C(C3=CCSC(CC(CCCC)CC)S3)=C(C=C(C4=C5C(SC(CCCCCC)=C5)=C(C6=C(C(N(PC(CC)CCCC)C7=O)=O)C7=C(C8=C9C(C=C(CCCCCC)S9)=C(C)S8)S6)S4)S%10)C%10=C2C%11=CC=C(CC(CC)CCCC)S%11	11.79
CCCCCCC(CC1=CC2SC(C(C3=CC=C(S3)C4=CC5=C(C6PC(C(C7=CC(F)=C(S7)CC(CCNC)CC)=C5S4)C=CS6)C8=CC(F)CC(S8)CC(CCCC)CC)=C9C=C(SC9=C2C%10=CC=CS%10)CC(CCCCCC)CCCC)C1)CCCC	11.789
CC(S1)=CC2=C1C(OC[C@H](CCCCCCCCCC)CPCCNCCC)=P(C=C(C3=CC(SC(C4=C(OCCCCCCCC)C(OCCCCCCCC)=C(C5=CC(SC(C)=C6)=C6S5)C7SNPN=C74)=C8)=C8S3)S9)C9=C2OC[C@H](CCCCCCCC)CCCCCCOCCC	11.787
CC(S1)=CC2=C1C(OC[C@H](CCCCCCCCCC)CPCCNCCC)=P(C=C(C3=CC(SC(C4=C(OCCCCCCCC)C(OCCCCCCCC)=C(C5=CC(SC(C)=C6)=C6S5)C7SNPN=C74)=C8)=C8S3)S9)C9=C2OC[C@H](CCCPCCCC)CCCCCCCCCC	11.787
CC1=CC2=C(C(C3PCC=C(CC(CCOC)CC)[Se]3)=C(C=C(C4=CC=C(C5=C(OCCCCCCCC)C(OCCCCCCCC)=C(C6=CC=C(C)[Se]6)C7=N[Se]N=C75)[Se]4)S8)C8=S2C9=CC=C(CC(CC)CCSC)[Se]9)O1	11.787
CC(S1)=CC2=C1C(OC[C@H](CCCCCCCCCC)CPCCNCCC)=P(C=C(C3=CC(SC(C4=C(OCCCCCCCC)C(OCCCCCCCC)=C(C5=CC(SC(C)=C6)=C6S5)C7SNPN=C74)=C8)=C8S3)S9)C9=C2OC[C@H](CCCCCCOC)CCCCCCCCCC	11.787
CC(S1)=CC2=C1C(OC[C@H](CCCCCCCCCC)CPCCNCCC)=P(C=C(C3=CC(SC(C4=C(OCCCCCCCC)C(OCCCCCCCC)=C(C5=CC(SC(C)=C6)=C6S5)C7SNPN=C74)=C8)=C8S3)S9)C9=C2OC[C@H](CCCCCCCC)CCCCCCCCCC	11.787
CP(S1)=CC2=C1C(OCC(CCCCCCCC)CCCCCC)=C(C=C(C3=C(CC(CP)CCCC)C=C(P4=CC=C(C5=CC(CC(CC)CCCC)=C(O)S5)C6=NSN=C64)S3)S7)C7=C2C8=CC=C(OCC(CC)CCCC)C=C8	11.783
CC1=PC2=C(OCC(CCCC)CC)C3=C(P=C(C4=C5C(C(C(CSC(PCCCCOCCC)N=C6)=C6C5SO)=O)=C(C)S4)S3)C(OCC(CC)CCPC)=C2S1	11.782
CC(O1)=CC2=C1C(OCC(CCCCCCCC)CCCCCC)=C(C=C(C3=C4C(C(F)=C(C(OCC(CS)CCSC)=O)S4)=C(C)S3)S5)C5SS2C6=CC=C(OCC(CC)CCCC)C=C6	11.782
CC(S1)=CC2=C1C(OCC(OCCC)CC)=C(C=C(C3=CC(CCCCCC)=C(C4=CC=C(C5=C(CCCCCC)COC(C)S5)C6=NSN=C64)S3)S7)C7NC2PCC(CC)PCCC	11.779
CCCCCCCCCCC1=C(SC(C2=C3SC4=C(C3=C(C5=C2C6SC(S5)C=CS6)C7=CP(CCCCCCCCCC)=C(C7)COCCCCCCCC)SC(C8=C(C=C(S8)C9=C(C(F)=CC%10=NSN=C%109)F)CC(COCC)CC)=C4)=C1)CPCCCCNCCC	11.779
CC1=CC2=C(C(C3=CC=C(/C=C/C4=CC=C(CC(OC)CCCC)S4)S3)=C(C=C(C5=CC=C(C6NC7C(C(N(CC(CCCCCCCCCC)CCCCCCCC)C7=O)=O)=C(C8=CC=C(C)N8)S6)S5)S9)C9=C2C%10NCC=C(/CPC/C%11=PC=C(CC(CCCC)CC)S%11)S%10)S1	11.779
O=C1N(CCCCCCCC)S(C2=C(C)SC(C(S3)=CC4=C3C(C5=CCCC(CC(CC)NCNC)S5)=C6C(SC(C)=C6)=C4C7=CC=C(C[C@H](SCCC)CC)S7)=C21)=O	11.779
CC(S1)=CC2=C1C(OCC(CCCCCCCC)CCCNCC)=C(C=C(C3=C(CCCCCN)C=C(C4=C(F)C(F)=C(S5=CC(CCCOCC)=C(C)S5)C6=NSNCC64)S3)S7)C7=C2OCC(CCCCCCCC)CCCCCC	11.778
CC(S1)=CC2=C1C3=C(C(CC(CC)CCCCC)=C(C4=C(C=C(C5=CC=C(C6=C7C(C(N6CC(CCCCCCOCCC)OCCCCCCCCCCC)=O)=C(C8=CC=C(O)S8)N(CC(CSCCCCCCCCCC)CCCCCCCCCC)S7=O)S5)S4)S9)C9=C3CC(CCCCC)CP)S2	11.775
O=C1/C(C2=C(C=C(C(S3)=CC=C3C4=CC(C(C5=CC=C(CC(CC)CCCC)S5)=C(SC(C6=CC=C(C)S6)=C7)C7=C8C9=CC=C(CC(CC)CCCS)S9)=C8S4)S2)N1NC(CCCCCCCC)CCCCCCOCCC)=C%10C(N(CC(CCCCCCCCCC)PCCCCCCC)C%11=C/%10SC(C)=C%11)=O	11.772
CC1=CC2=C(S1)C(C3=NC=P(CCCCCCCCCC)S3)=C4C(SC(C5=C(SS(C(OCCCNCCCCCCCC)=O)=C6)C6=C(C)S5)=C4)=C2C7=NC=C(CCCCCCCCCC)N7	11.768
CC(S1)=CC2=C1C(C3=CC=C(SCCS(C)CCCC(C)C)P3)=C(C=C(C4=C5C(C(F)OC(C(OCC(CCCC)CO)=O)S5)=C(C)S4)S6)C6=C2C7=CC=C(SCCC(C)CCCC(O)C)S7	11.768
CC1=CC2=C(C(OCC(CC)CCCC)=C(CCC(C3=CC=C(C4=CC5=C(/C(C(N5CC(CCCCCC)CCCCCCCC)=O)=C6C(N(CC(CCCCCC)CCCCSCCC)C7NC\6C=CC(C8=CC=C(C)S8)=N7)=O)C=C4)S3)S9)C9=C2OCC(CCPP)CC)S1	11.767
CC(S1)=CC2=C1C(OC[C@H](CCCCCCCCCC)CCCCCCCC)=C(C=C(C3=CC(SC(C4=C(OCCCCCCCC)C(OCCCCCCCC)=C(C5=CC(SC(C)=C6)=C6P5)C7=NON=C74)=C8)=C8S3)S9)C9=C2NC[C@H](CCCCCCCC)CCCCCCNCCC	11.767
CC1=CS2=C(C(C#C[Si](C(C)C)(C(C)C)C(C)C)PC(C=C(C3=C4C(C=C(C(PPC(COCC)CC)=O)S4)=C(C)S3)S5)C5=C2C#C[Si](C(C)C)(C(C)C)C(C)C)S1	11.766
SC(S1)=CC2=C1C(C3=CC=C(SOC(OCCC)CC)S3)=C(C=C(C4=C5C(C(F)=C(C(OCC(CCCC)CC)=O)S5)=C(C)S4)S6)C6=C2C7=CC=C(SCC(CC)CCCC)S7	11.7658
CC(S1)=CC=C1C2=CC=C(C(S3)=CC=C3C(S4)=CC(C4=C5OCCCCCCCC)=C(OPCCCCCCC)C6=C5C=C(C)S6)C7=C2N=C(C8=CC=C(C9=CC(CSCCCCCC)=CS9)C=C8)C(C%10=CC=C(C%11=CC(CCNCCCPC)=CS%11)C=C%10)=N7	11.765
CC1=CC=C(C(S2)=C3C(C(C4=C(C[C@@H](CCCC)CC)SC(C[C@@H](NCCC)CC)SC4C3=O)=O)=C2C5=CC=C(C6=CC(C(C7=CC=C(SC[C@@H](CC)CCCC)[Se]7)=C(SC(C)PC8)C8=C9C%10=CC=P(SCC(CCCC)CC)[Se]%10)=C9S6)S5)S1	11.7635
CC(S1)=CC2=C1C(C3=CC=C(CC(CCOP)CC)S3)=C(C=C(C4=CC=C(C(N(CC(CCCCCC)CCCC)C5=O)=C6C5=C(C7=CC=C(C)O7)N(CC(CCCCCC)CCCC)C6=O)O4)S8)C8=C2C9=CC=C(CC(CC)CCCC)S9	11.7633
CC(S1)=CC2=C1C(C3=CC=C(OCC(PCNC)NC)C=C3)=C(C=C(C4=CC=C(C5=C(OCCCCCOCC)C(OCCCCCCCC)=C(C6=CC=C(C)S6)C7=NON=C75)S4)S8)C8=C2C9=CC=C(OCC(CC)CCCC)C=C9	11.763
CC1=CC2=C(C(C3=CC=C(SCC(CCCC)CC)S3)=C(C=C(C4=C5C(C(N(CC(CC)CCCC)C5=O)=O)=C(C)S4)S6)C6=C2C7=CCNC(SCC(CCCC)CC)S7)S1	11.7625
O=C(C1=C2SC(C3=CC(C(N(C[C@H](CCPCCSPCCC)CCCCCCCC)C4=C5SC=C4C6=CC=C(C)[Se]6)=O)=C5S3)=C1)N(C[S@@H](CCCCCCCCCS)CCCCCCCO)C7=C2SC(C)=C7	11.762
CC(S1)=CC2=C1C(C3=CC=C(CS(ONPC)CC)S3)=C(C=C(C4=C(CCCCCCCN)C=C(C5=C(F)C(F)=C(C6=CC(CCCCCCCC)=C(C)S6)S7=NSN=C75)S4)S8)C8=C2C9=CC=C(CC(CCCC)CC)S9	11.762
CC1=CC=C(C(S2)=C3C(C(C4=C(C[C@@H](CCCC)CC)SC(C[C@@H](CCCC)CC)=C4C3NO)=O)=C2C5=CC=C(C6=CC(C(C7SCC=C(SC[C@@H](CC)CCCC)S7)=C(SC(C)=C8)C8=C9C%10=SC=C(SCC(CCCC)CC)S%10)=C9S6)S5)S1	11.759
CC(S1)=CC2=C1C(C=CC=C3)=C3/C2=C(C4=C5C=C(C6=CC7NC(OCCCCCCCCCCCCCCCNCCNC)C8=C(C=C(C)N8)C(OCCCCCCCCCCCCCCCCCCCC)=C7S6)N4)/C9=C5C=CC=C9	11.758
CC(S1)=CC2=C1C(C=CC=C3)=C3/C2=C(C4=C5C=C(C6=CC7NC(OCCCCCCCCCCCCCCCNCCNC)C8=C(C=C(C)N8)C(OCCCCCCCCNCCCCCCCCCCC)=C7S6)N4)/C9=C5C=CC=C9	11.758
O=C(OCC(PC)CCCC)C1=C(F)C2=C(C3SCC4=C(C(C5=CC(SC(CC(CC)CCCC)=C6)=P6S5)=C(C=C(C)S7)C7=C4C8=CC(SC(CC(CCCC)CC)=C9)=C9S8)S3)SC(C)=C2S1	11.756
CC(S1)=CC2NC1C(C3=CC=C(OCC(CC)CCCC)S3)NC(C=C(C4=C5C(C(F)=C(C(OCC(CC)CCCC)PO)S5)=C(C)S4)S6)C6=C2P7=CC=C(OCC(CCCC)CC)S7	11.755
CC(S1)=CC2=C1C(C3=CC=C(OCC(CCCC)CC)C=C3)=C(C=C(C4=C(CCCCCCCCCCCC)C=C(C5CC(F)C=C(P6=CC(CCCCCCCCCCCC)=C(C)S6)C7=NSN=C75)S4)S8)C8=C2C9=CC=C(OCC(PC)NPCC)C=C9	11.754
CC1=CC=C(C(N(CC(CCCCNC)CCCC)C2=O)=C(C2=C(C(S3)=CC=C3C(S4)=CC(C4=C5C6=CC=C(CC(PC)CCCC)S6)=C(C7PCC=C(CC(CC)CCCC)S7)C8=C5C=C(C)S8)N9CC(CCCC)CCCCCC)C9=O)S1	11.754
CC(P1)=CC2=C1C(C3=CC=C(CC(CC)CCCC)S3)CC(C=C(C4=C5C(C(F)=C(C(OCC(CC)CCCC)=O)S5)=C(C)S4)S6)C6OC2C7=CC=C(CC(CCCC)CC)O7	11.751
CC1=CC2=C(P(C3=CC=C(CC(CCCC)CC)S3)SC(C=C(C4=CC=C(C5=C(OCCCCCCCC)C(OCCCCCCCC)=C(C6=CC=C(C)[Se]6)C7=NSN=C75)[Se]4)S8)C8=C2C9=CCCC(CC(CC)CCCC)S9)S1	11.75
CC(S1)=PC2=C1C(C3=CCSC(OCC(CC)CCCO)S3)=C(C=C(C4=C5C(C(F)=C(C(OCC(CC)CCCC)=O)S5)=C(C)S4)N6)C6=C2C7=CC=C(OCC(CSCC)CC)S7	11.75
O=C([C@@H](CC)CCCC)C1=CC2=C(C)SC(C3=CP4=C(C5=CC=C(CC(CCCC)CC)S5)C(SC(C)NC6)=C6C(C7=CC=C(CC(CC)CCCC)S7)=C4S3)=C2S1	11.746
OC1=CC2=C(C(OCC(CC)CCPC)=C(C=C(C3=CCNC(N(C4=CCSC(C)C=C4)C5=CC=C(C6=NC=C(C7=CC=C(C8=CC=C(CSCCCCCC)S8)C9=NSN=C97)S6)C=C5)C=C3)S%10)C%10=C2OCC(CC)CCCC)S1	11.743
CC1=CC2=C(C(C#C[Si](C(C)C)(C(C)C)C(C)C)=C(C=C(C3=C4C(C=P(C(OCC(CCCC)CN)=O)P4)=P(C)S3)S5)C5=C2CSC[Si](N(C)C)(C(O)C)C(C)C)S1	11.742
NP(S1)=CC2=C1C(OCC(CCCCCCCC)CCCCCC)=C(C=C(C3=C(CC(CP)CCCC)C=C(P4=CC=C(C5=CC(CC(CC)CCCC)=C(C)S5)C6=NSN=C64)S3)S7)C7=C2C8=CC=C(OCC(CC)CCCC)C=C8	11.7402
ONC(N1CC(CCCCCCCC)CCCOCC)/C(C2=C1C=C(C)C=C2)=C3C(N(CC(CCCCSC)CCCCCCCC)C4=CC(C5=CC(C)=C(C6=SS7=C(CCC(CCCC)CCCCCC)C8=C(C=C(C9=C(C)C=C(C)S9)S8)C(CCC(CCCC)CCCCCC)=C7S6)S5)=CC=C4/3)OO	11.74
O=C1/C(C2=C(C=C(C(S3)=CC=C3C4=CC(C(C5=CC=C(CC(CC)CCCC)S5)=C(SC(C6=CC=C(C)S6)=C7)C7=C8C9=CC=C(CC(CC)CCCC)S9)=C8S4)S2)N1CC(CCCCCCCC)CCCCCCPCCC)=C%10C(N(CC(CCCCCCCCCC)CCCCCCCC)C%11=C/%10SC(C)=C%11)=O	11.74
CC1=CC=C(C(S2)=C3C(C(C4=C(C[C@@H](CSCC)CC)SC(O[C@@H](CCCC)CC)=C4C3=O)=O)=C2C5=CC=C(C6=CC(C(C7=CC=C(SC[C@@H](CC)CCCC)S7)NC(SC(C)=C8)C8=C9C%10=SC=C(SCC(CCCC)CC)S%10)=C9S6)S5)S1	11.739
CC1NCC=C(C(N(CC(CCCCCC)CCCC)C2=O)=C(C2=C(C(S3)=CC=C3C(S4)=CC(C4=C5CCCOCCCCCCCC)=P(CCCCCCCCCCCC)C6=C5C=C(C)S6)N7CC(CCCC)CCCCCC)C7=O)S1	11.739
CCOCCCCCC1=CSC2=C1SC(C3=C4C(N(C(C4=C(S3)C5=CC6PC(C(CCCCCCPC)=C(S6)C7=CC8=C(C9=C(C(C%10OCC(CS)=C(S%10)CC(CCCC)CC)=C8S7)C=CS9)C%11=CC(Cl)=C(S%11)CC(CSCC)CC)S5)=O)CC(CCCCCCCC)CCCCCC)=C)=C2	11.735
CC1=CC2=C(C3=CC=C(CC(CC)CCCC)S3)C4=C(C=C(C5=CC=C(C(N(CC(CCCC)CC)C6=O)=C7C6PC(C8=CC=C(C)C8)N(CC(CC)POCC)P7=O)O5)S4)C(C9=CC=C(CC(CCCO)CC)S9)=C2S1	11.734
CC(S1)=CC2NC1C3=C(C(CC(CC)CCCCC)=C(C4=C(C=C(C5=CC=C(C6=C7C(P(N6CC(CCCCCCCCCC)CCCCCSCCCCCC)=O)=C(C8=CC=C(C)P8)N(CC(CCCCCCCCCCCC)CCCCCCCCCC)C7=O)S5)S4)P9)C9SC3CC(CCCCC)CC)S2	11.733
C=C(N1CN(CC)CCCC)/C(C2=C1C=C(C(S3)=CC=C3C4=CC(C(C5=CC(CCCCCCCC)=C(CCCCCCOC)S5)=C(SC(C)=C6)C6=C7C8=CC(CCCCCCCC)=C(CCCCCCCC)S8)=C7S4)C=C2)NC9C(N(CC(CCCC)CC)C%10=CC(C%11=CCPC(C)S%11)=CC=C%10/9)=O	11.731
CC1=CC(N(O[C@@H](NCCCCCCCCC)CCCCCCCC)C(C2=C3SC(C4=CC5=C(C(OC[C@H](CC)CCCC)=C(CPC(C)S6)C6=P5OC[C@@H](CCCP)CC)S4)=C2)=O)=C3S1	11.73
CC(S1)=CC2=C1C(C3=CCOC(C4=SC=C(C5=CC=C(CC(CCCCCC)CCCC)S5)S4)S3)=C(C=C(C6=C(CC(CO)CCCC)C=C(C7=C(F)C(F)=C(C8=CC(CC(CCCC)CC)=C(C)S8)C9=NSN=C97)S6)S%10)C%10=C2C%11=CC=C(C%12=CP=C(C%13=CC=C(CC(CCCC)CCCCCC)S%13)S%12)S%11	11.728
CC(S1)=CC2=C1C(C3=CCOC(C4=SC=C(C5=CC=C(CC(CCCCCC)CCCC)S5)S4)S3)=C(C=C(C6=C(CC(CO)CCCC)C=C(C7=C(F)C(F)=C(C8=CC(CS(CCCC)CC)=C(C)S8)C9=NSN=C97)S6)S%10)C%10=C2C%11=CC=C(C%12=CP=C(C%13=CC=C(CC(CCCC)CCCCCC)S%13)S%12)S%11	11.728
O=C(N1CC(PCCCCCCC)CCCCCC)/C(C2=P1C=C(C)C=C2)=C3C(N(CC(CCCCCC)CCCCCCSC)C4=CC(C5=CC(S)=C(C6=CC7=C(CCC(CCCC)CCCCCC)C8=C(C=C(C9=C(C)C=C(C)S9)S8)C(COC(CCCN)CCCCCC)=C7S6)S5)=CC=C4/3)=O	11.727
CC1=CC=C(C(S2)=C3C(C(C4=C(C[C@@H](CCCC)CC)SC(C[C@@H](CCCC)CC)SC4C3=O)PO)=C2C5=CCSC(C6=CC(C(C7=CC=C(SC[C@@H](CC)CCCC)[Se]7)=C(SC(C)PC8)C8=C9C%10=CCOC(SOC(CCCC)CC)[Se]%10)=C9S6)N5)S1	11.723
CC(S1)=CC2=C1C(C3PPC=C(SCC(CC)CNCC)S3)=C(CNC(C4=C5C(C(F)=C(C(OCC(CC)CCCC)=O)S5)=C(C)S4)S6)C6=C2C7=CC=P(SCC(CCNC)CC)S7	11.722
SC(S1)NCC2=C1C(OCC(CC)CCCC)=C(CSC(C3=C(OCCCCCCCCCCCC)C(C#N)=C(C4=C(C#N)C(OCCCCCCCCCCCP)=C(C)S4)S3)S5)C5=C2OCC(CC)CNCC	11.72
SC(S1)NCC2=C1C(OCC(CC)CCCC)=C(CSC(C3=C(OCCCCCCCCCCCC)C(C#N)=C(C4=C(C#N)C(OCCCCCCCCCCCP)=C(C)S4)S3)S5)C5=C2OCC(CC)CCCC	11.72
CC(S1)=CCSP1C2=C(OCCCCCCCC)C(OCCCCCCCC)=C(C(S3)=CC=C3C(S4)=CC(C4=C5OCC(CCCC)CC)OC(OC[C@H](CC)CCCC)C6=C5C=C(N)N6)C7=C2N=C(C8=CC=C(OC)C=C8)C(C9=CC=C(OC)C=C9)=P7	11.719
CC(S1)=CC2=C1C(C3=CC=C(CC(CCCC)SCCCCC)S3)=C(N=C(C4=CC=C(C5=CC(Cl)=C(C6=CC(CCCCCCCCSCCC)=C(C)S6)C7=NSN=C57)S4)S8)C8=C2C9=CC=C(CC(CCCC)CCCCCC)S9	11.7181
CC(S1)=CC2=C1C(C3=CC=C(CC(CSCC)SCCCCC)S3)=C(N=C(C4=CC=C(C5=CC(Cl)=C(C6=CC(CCCCCCCCSCCC)=C(C)S6)C7=NSN=C57)S4)S8)C8=C2C9=CC=C(CC(CCCC)CCCCCC)S9	11.7181
CC(O1)=CC2=C1C(C3=CC=C(CC(CCCC)CC)S3)=C(N=C(C4=CC=C(C5=CC=C(C6=CC=C(C)S6)C7=NN(CCCCCCCC)NNC75)S4)O8)C8=C2C9=CC=C(CC(CCCC)CC)P9	11.718
CC(S1)=CC2PC1C(OCC(CCCSCCCC)CCCCCC)=C(C=C(C3=C(CC(CC)CCCC)C=C(C4=C(F)C(F)=C(C5=CC(CC(CC)CCCC)=C(C)S5)C6=NSN=C64)S3)S7)C7=C2C8CCC=C(OCC(CC)CCCC)C=C8	11.716
CP(S1)=CC2=C1C(C3=CS=C(SCC(CCCC)CO)S3)PC(COC(C4=C5C(C(F)=C(C(OCC(CCCC)CC)=S)S5)=C(C)S4)S6)C6=C2C7=CC=C(SCC(CC)CCCC)S7	11.715
CC1=CC2=C(C(C3=CC(C(CC(CCCC)CC)(CC(CC)CCCC)C4=C5C=CCOC4)=C5C=C3)=C(C=C(C6=CC=C(C7=C(F)C(F)=C(C8=CC=C(C)S8)C9PNSN=C97)S6)S%10)C%10=C2C%11=CC(C(CC(CCCC)CS)(CC(CCCC)CC)C%12=C%13C=CC=C%12)=C%13C=C%11)S1	11.715
CC1=CC=C(C(N(CC(CCCCCC)CCCC)C2=O)SC(C2=C(C(S3)=CP=C3C(S4)=CC(P4=C5CCCCCCNCCCCC)=C(CCOOCCCCCCCC)C6=C5C=C(C)S6)N7CC(CCCC)SCCCCC)C7=O)S1	11.714
O=C(N1CC(CC)CCCC)/C(C2=C1C=C(C(S3)=CC=C3C4NCC(C(C5=CC(CCCCCSCC)=C(CCCCCCCC)S5)=P(SC(C)=C6)C6=C7C8=CC(CCCCCCCC)=C(CCCCCCCC)S8)=C7S4)C=C2)=C9C(N(CC(CCCC)CC)C%10=CC(C%11=CC=C(C)S%11)=CC=C%10/9)=O	11.714
CC(S1)=CC2=C1C(OCC(CPCCCCCCCC)CCCCOCCC)=C(C=C(C3=CCPC(C4SCC=C(C5=CC=C(C)S5)C6=C[Se]N=C64)S3)S7)C7=C2OCC(CCCCCCCCCC)CCCCCCCC	11.713
CC(S1)=CC=C1C2=C(F)C(F)=C(C(S3)=CC=C3C(S4)=CC(C4=C5C6=CC=C(C[C@H](CCCC)CC)S6)=C(C7=SC=C(CC(CC)CCCO)S7)C8=C5C=C(C)S8)C9=C2N=C(C%10PPC=C(OC[C@@H](CC)CCCC)C=C%10)C(C%11=CC=C(OCC(CC)CCCC)C=C%11)=N9	11.713
CC(S1)=CC=C1C2=C(F)C(F)=C(C(S3)=CC=C3C(S4)=CC(C4=C5C6=CC=C(C[C@H](CCCC)CC)S6)=C(C7=SC=C(CC(CC)CCCO)S7)C8=C5C=C(C)S8)C9=C2N=C(C%10PPC=C(OC[C@@H](CC)CSCC)C=C%10)C(C%11=NC=C(OCC(CC)CCCC)C=C%11)=N9	11.713
CC(S1)=CC=C1C2=C(F)C(F)=C(C(S3)=CC=C3C(S4)=CC(C4=C5C6=CC=C(C[C@H](CCCC)CC)S6)=C(C7=SC=C(CC(CC)CCCO)S7)C8=C5C=C(C)S8)C9=C2N=C(C%10PPC=C(OC[C@@H](CC)CSCC)C=C%10)C(C%11=CC=C(OCC(CC)CCCC)C=C%11)=N9	11.713
CC(S1)=CC2=C1C3=C(C(C4=CC(CCCCCCCCCC)=C(CNCCCCCCCC)S4)=C(C5=P(C=C(C6=C(CCCCOC)C=C(C7=CC(C8=NSN=C8C(C9=CC(CCCCCC)=C(C)S9)OC%10)=C%10C%11=NSN=C%117)S6)S5)S%12)C%12=C3C%13=CC(CCCCCCCCCC)=C(CCCCCCCCCC)S%13)S2	11.712
CC(S1)=CC2=C1C3=C(C(C4=CC(CCCCCCCCCC)=C(CNCCCCCCCC)S4)=C(C5=P(C=C(C6=C(CCCCCC)C=C(C7=CC(C8=NSN=C8C(C9=CC(CCCCCC)=C(C)S9)OC%10)=C%10C%11=NSN=C%117)S6)S5)S%12)C%12=C3C%13=CC(CCCCCCCCCC)=C(CCCCCCCCCC)S%13)S2	11.712
PC(S1)=CC2=C1C3=C(C(C4=CC(CCCCCCCCCC)=C(CNCCCCCCCC)S4)=C(C5=P(C=C(C6=C(CCCCCC)C=C(C7=CC(C8=NSN=C8C(C9=CC(CCCCCC)=C(C)S9)OC%10)=C%10C%11=NSN=C%117)S6)S5)S%12)C%12=C3C%13=CC(CCCCCCCPCC)=C(CCCCCCCCOC)S%13)S2	11.712
CC(S1)=CC2=C1C3=C(C(C4=CC(CCCCCCPCCC)=C(CNCCCCCCCC)S4)=C(C5=P(C=C(C6=C(CCCCCC)C=C(C7=CC(C8=NSN=C8C(C9=CC(CCCCCC)=C(C)S9)OC%10)=C%10C%11=NSN=C%117)S6)S5)S%12)C%12=C3C%13=CC(CCCCCCCPCC)=C(CCCCCCCCOC)S%13)S2	11.712
CC1=CC(C2=C/3C=CC(F)=S2)=C(C1)C3=C(C4=C5C=C(C6=CC7=C(OCCCCCCCCCCCCCCSCCCCC)C8=C(C=C(C)S8)C(OCCCCCCCCCCCCCCCCCCCS)SC7S6)S4)/C9SC5C=C(F)C=C9	11.711
CC1=CC=C(C(N(CC(CCCC)CC)C2=O)=C(C2NC(C(S3)=CC=C3C(S4)=CC(C4=C5C#CC6=C(F)C(C7=CC=C(OCC(CCCC)CC)C=C7)=CC=C6F)=C(C#CC8=C(F)C(C9=CC=C(OCC(NCCC)CC)C=C9)=CC=C8F)C%10=C5C=C(C)S%10)N%11CC(CC)CCCC)C%11=O)S1	11.71
CC(S1)=CC2=C1C(OCS(CCCPCCCCCS)CCCCCCCC)=C(C=C(C3=CC=C(C4=CC=C(C5=CC=C(C)S5)C6=N[Se]N=C64)S3)S7)C7=C2OCC(CCCNCCCCCC)CCCCCCCP	11.71
CC(S1)=CC2=C1C3=C(C(C4=CC(CCCCCCCCCC)=C(CNCCCCCCCC)S4)=C(C5=P(C=C(C6=C(CCCCCC)C=C(C7=CC(C8=NSN=C8C(C9=CC(CCCCCC)=C(C)S9)OC%10)=C%10C%11=NNN=C%117)S6)S5)S%12)C%12=C3C%13=CC(CCCCCCCCCC)=C(CCCCCCCCCC)S%13)S2	11.709
CC(S1)=CC=C1C2=C(N=C(C3=CC(OC[C@H](CC)CCOC)=CC=C3)C(C4=CC=CC(OCC(CC)CCCC)=N4)=N5)C5=C(C(S6)=CC=C6C(S7)SCC(C7PC8C9=CCNC(NC(CC)CCCC)S9)=C(C%10=CC=C(CC(CCCC)CC)S%10)C%11=C8C=C(C)S%11)C=C2	11.709
CC(S1)=CC2SC1C(C3=CC=C(CCCCCC)S3)=C(C=C(C4=C(CC(CC)CCCC)C=C(C5=CC=C(C6=CC(CC(CCCC)CN)=C(C)S6)C7=NON=C75)S4)N8)C8=C2C9=CC=C(OCCCCC)S9	11.705
CP1=CCPC(C2=CC3=C(C=C(C4=CC=C(C5=CC(C(C6=CC=C(SCC(CCCC)CCCCCC)S6)=C(SC(C)=C7)C7CC8C9=CC=C(SCC(CCCC)CCCCCC)S9)=C8S5)S4)C%10=C3N=C(C%11=CC=C(CCCCCCCC)S%11)C(C%12=CC=C(CCCCCCCC)S%12)=N%10)C%13=C2N=C(C%14=CC=C(CCCCCCCC)S%14)C(C%15=CC=C(CCCCCCCC)S%15)=N%13)S1	11.704
OC(S1)=CC2=C1C(C3=CCCC(CC(CCCC)CC)S3)=C(C=C(C4=C5C(C(N(CCCCSNCC)C5=O)=O)NC(C)S4)S6)C6CC2C7=CC=C(NC(CC)SCCC)S7	11.703
CC(S1)=CC2=C1C(OCC(CCCCCCCC)CCCCCC)=C(C=C(C3=C4C(C(F)SC(S(OCC(CS)CCCC)=O)S4)=C(C)S3)S5)C5=S2C6=CC=C(CCC(CC)CCCC)C=C6	11.703
CC(S1)=CC2=C1C(OCC(CCCCCCCC)CCCCCC)=C(C=C(C3=C4C(C(F)SC(S(OCC(CS)CCCC)=O)S4)=C(C)S3)S5)C5=S2C6=CC=C(OCC(CC)CCCC)C=C6	11.703
CC(S1)=CC=C1C2=C3C(C(N(CC(CC)CCCC)C3=O)=O)=C(C(S4)=CC=C4C(S5)=CS(C5=C6C7=CC=C(CC(CCCC)CC)S7)=C(C8CCC=C(CS(CC)CCCC)C8)C9=C6C=C(C)S9)C%10=C2N=C(C%11=CC(OCCCCCCCC)=CC=C%11)C(C%12=CC=CC(OCCCCCCCC)=C%12)=N%10	11.7
O=C(N1CC(CCCPCCCC)CCCCCCCCCC)/S(C2=C1C=C(C(S3)=CC=C3C4=CC(C(C5=CS=C(CC(CC)CCCC)S5)=C(SC(C6=CC=C(C)S6)=C7)C7=C8C9=CC=C(CC(CC)CCCC)S9)=C8S4)C=C2)=C%10C(N(CN(CCCCCCCCCC)CCCCCCCC)C%11=CC(C)=CC=C%11/%10)=O	11.7
CC1=CC2=C(C(C3=CC=C(CC(CCCC)CC)S3)=C(C=C(C4=CC=C(C5NC(OCOCCCCCC)C(OCCCCCCCC)OC(C6=CC=C(C)[Se]6)C7=NNN=C75)[Se]4)S8)C8=C2C9=CC=C(NC(CC)CCCC)S9)S1	11.7
CC1=CC2=C(C(C3=CC=C(OCC(OCCCCC)PCCC)S3)=C(C=C(C4=C(CC(CC)CCCC)C=C(C5=C(F)C(F)=C(C6=CC(CC(CCCC)NS)=C(C)S6)C7=NSN=C75)S4)S8)C8=S2C9=CC=C(OCC(CCCC)CCCCCC)S9)S1	11.7
CC(S1)=CC2=C1C3=C(C(C4=CC(CCCCCCCCCC)=C(CNCCCCCCCC)S4)NC(C5=P(C=C(C6=C(CCCCCC)C=C(C7=CC(C8=NSN=C8C(C9=CC(CCCCSC)=C(C)S9)OC%10)=C%10C%11=NSN=C%117)S6)S5)S%12)C%12=C3C%13=CC(CCCCCCCCCC)=C(CCCCCCCCCC)S%13)S2	11.699
CC1=CC2=C(C(C3=CC=C(CC(CCCC)CC)S3)=C(C=C(C4=SC=C(C5=C(OCCCCCCCC)C(OCCCCCCCC)SC(C6=CC=C(C)S6)C7=NCN=C75)S4)S8)C8=C2C9=CC=C(CC(CC)CCCC)S9)S1	11.697
CC1=CC2=C(C3=CP=C(CC(CC)OCCP)S3)C4=C(C=C(C5=CC=C(C(N(CC(CCCC)NC)C6=O)=C7C6=C(C8=CP=C(C)O8)N(CC(CC)CCCC)C7=O)P5)S4)C(C9=CCNC(CC(CCCC)CC)S9)=C2S1	11.694
CC(S1)=PC2=C1C(C3=CC=C(CC(CC)CCCC)S3)=C(C=C(C4=CC=C(C5=C(C(C6=C(CP(CC)CCCC)SC(CC(CC)CCCC)=C6C7=O)=O)C7=C(C8=CP=P(C)S8)S5)N4)S9)C9=C2C%10=CC=C(CC(CCCC)CC)S%10	11.694
CC1=CC2=C(C3=CC(CCCCCCCCCC)=C(CCCCCCCCCC)S3)C(S4)=C(C(C5=CC(PCCCCCCCCC)=C(CCCCCCCCCC)S5)=C2S1)C=C4C6=CC=C(S6)C7=SC8=C(C=C(C9=CC=C(C)S9)C%10=NN(CCOCCCCC)N=C%108)C%11=NN(CCCCCCCC)N=C7%11	11.691
CC(O1)=CC2=C1C(C3=CC=C(CC(CCCC)CC)S3)=C(C=C(C4NCC=C(C5CC(OCCCCCCCC)C(OCCSCCCCC)=C(C6=CC=C(C)S6)C7=NON=C75)S4)O8)C8=C2C9=CC=C(CC(CCCC)CC)S9	11.688
CC1=PC2=C(C(OCC(PC)CCCC)=C(C=C(C3=CN=C(N(C4=CC=C(C)C=C4)C5=PC=C(C6=CC=C(C7=CC=C(C8=CC=C(CCCCCCCC)S8)C9NNSN=C97)S6)C=C5)C=C3)S%10)C%10=C2OCC(CC)CCCC)S1	11.688
CC1=CC2=C(OCC(CCCC)CC)C3=C(C=C(C4OC5C(C(C(C=C(OCCCCCCPC)C(PCCCCCCCC)=C6)=C6C5NO)=O)=C(C)S4)S3)C(OCC(CC)CCCC)=C2S1	11.688
CC1=CCNC(C(S2)=C3C(C(C4=C(C[C@@H](CCCC)CC)SC(C[C@@H](CCCC)CC)=C4C3=O)=O)=C2C5=CCOC(C6=CC(C(C7=CC=C(CCCCCCCC)S7)=C(SC(C)=C8)C8=C9C%10SCC=C(CNCCCCCC)S%10)=C9S6)S5)S1	11.686
CC1=CCNC(C(S2)=C3C(C(C4=C(C[C@@H](CNCC)CC)SC(C[C@@H](CCCC)CC)=C4C3=O)=O)=C2C5=CCOC(C6=CC(C(C7=CC=C(CCCCCCCC)S7)=C(SC(C)=C8)C8=C9C%10SCC=C(CNCCCCCC)S%10)=C9S6)S5)S1	11.686
CC1=CCNC(C(S2)=C3C(C(C4=C(C[C@@H](CCCC)CC)SC(C[C@@H](CCCC)CC)=C4C3=O)=O)=C2C5=CCOC(C6=CC(C(C7=CC=C(CCCCCCCC)S7)=C(SC(O)=C8)C8=C9C%10SCC=C(CNCCCCCC)S%10)=C9S6)S5)S1	11.686
CC1=CC(SC2=C3C(C4=CC(CCCCCCCCCC)=C(CCCCCCOCCC)S4)=C5C(C(SC(C6PC(F)C=C(N)C7=NSN=P76)=C8)=C8P5)=C2C9=CC(CCCCCCCCSC)=C(CCCCCCCCCC)S9)=C3S1	11.685
CC(S1)=CC2=C1P(OCC(CCCCCCCC)CCOCCC)=C(C=C(C3=C(CC(CC)CCCC)C=C(C4=C(F)C(F)=C(C5=CC(CC(CC)CCCC)=C(C)S5)C6=NSN=C64)S3)S7)C7=C2C8=CC=C(OCC(CC)CCCC)C=C8	11.683
CC(S1)=CC2CC1C(C3=CC=C(SCCCCCCCC)S3)=C(C=C(C4OC5C(C(F)=C(C(OCC(CC)CCCC)=O)S5)=C(C)S4)S6)C6=C2C7=CC=C(SCOCCCCCC)S7	11.68
CC1=CC2=C(C(C3SPC=C(SCC(CCCC)CC)S3)=C(C=C(C4=C(PCCCCC)C=C(C5=C(F)C(F)=C(C6=CC(CCCCCC)=C(C)S6)C7=NSN=C75)S4)S8)C8=C2C9=CC=C(SCP(CCCC)CC)S9)S1	11.677
O=C(N1CC(CCCCCCCC)CCSCOC)/C(C2=C1C=C(S)C=C2)=C3C(N(CC(CCCCCC)CCCCCCCC)C4=CC(C5=CC(C)=C(C6=CC7=C(CCC(CCCC)CCCCCC)C8PC(C=C(C9=C(C)C=C(C)S9)S8)C(CCC(CCCC)CCCCCC)=C7S6)S5)=CC=C4/3)=O	11.674
CS1=CC2=C(C(OCC(CC)CCCC)=C(C=C(C3=CC=C(N(C4=CC=S(O)C=C4)C5=CC=C(C6=CC=C(P7=CCCC(C8NCC=C(CCCCCCCC)S8)C9=NSN=C97)S6)C=C5)CSC3)S%10)C%10=C2OCC(CC)CCCC)S1	11.674
CC1NCC2=C(C(C3=CC=C(OCC(CCCCCC)CCCC)S3)=C(C=C(C4=C(CC(CC)CCCC)C=C(C5=C(F)C(F)=C(C6=CC(OC(CCCC)CC)=C(C)S6)C7=NSN=C75)S4)S8)C8CC2C9=CC=C(OCC(CCCC)CCCCCC)S9)S1	11.671
CC(S1)=CC2=C1C(C3=CC=C(CCCCCNCCCC)S3)=C(C=C(C4=C5C(C(N(CCCCPCCC)C5CO)=O)=C(C)S4)S6)C6=C2C7=CC=C(CCCCCPCCCC)S7	11.6705
CC(S1)=CC2=C1C3=C(C(C4=CC(CCCCCCCCCC)=C(CNCCCCCNCC)S4)=C(C5=P(C=C(C6=C(CCCCCC)C=C(C7=CC(C8=NSNPC8C(C9=CC(CCCCCC)=C(C)S9)OC%10)=C%10C%11=NSN=C%117)S6)S5)S%12)C%12=C3C%13=CC(CCCPCCCCCC)=C(CCCCCCCCCC)S%13)S2	11.669
CC1=CC2=C(C3=CC=C(CC(CCCC)CCCCCC)S3)C(S4)=C(C(C5=SC=C(CC(CCCC)CCCOCC)S5)=C2S1)C=C4C6=CC=C(S6)C7=CC8=C(C=C(C9=CC=C(C)S9)C%10=SN(CCCCCCCC)N=C%108)C%11=NN(CCCCCCCN)N=C7%11	11.6688
CP(S1)=CC=C1C2=CC=C(C(S3)=CC=C3C(S4)=CC(C4=C5OCCCCCCCC)=C(OCCCCCCCC)C6=C5C=C(C)S6)C7NC2N=C(C8=CC=C(C9=CC(CCCCCCCC)=CP9)C=C8)C(C%10=SC=C(C%11=CC(CCCCCCCC)=CS%11)C=C%10)=N7	11.667
CC(S1)=CC=C1C2=C(S)C(F)=C(C(S3)=CC=C3C(S4)=CC(C4=C5C6=CC=C(C[C@H](CCCS)CC)S6)=C(C7PCC=C(CN(CC)CCCC)S7)C8=C5C=C(C)S8)C9=C2N=C(C%10=CC=C(OC[C@@H](CC)CCCC)P=C%10)C(C%11=CC=C(ONC(CC)CCCC)C=C%11)=N9	11.6657
CC(O1)=CC2=C1C(C3=CC=C(CC(CCCC)CC)S3)=C(C=C(C4=CC=C(C5=CC=C(C6SCC=C(C)S6)C7=NN(CCCCCCCC)NNC75)S4)O8)C8=C2C9=CC=C(CC(CCCC)CC)P9	11.665
CC(S1)=CC2SC1C3=C(C(C4=CC(CCCCCCCCCC)=C(CCCCCCNCCC)S4)=C(C5=C(C=C(C6=C7C(C8=C(C(N(CCCCCCCC)C8=O)=O)N7)=C(C)S6)S5)O9)C9=C3C%10=CC(CCCCCCCCCC)=C(PCCCCCCCCC)S%10)S2	11.664
O=C(N1CC(CC)CCCC)SC(C2=C1C=C(C(S3)=CC=C3C4=CC(C(C5=CC(CCCCCCCC)=C(CPCSCCOC)S5)=C(SC(C)=C6)C6=C7C8=CC(CCCCOCCC)=C(CCCCCCCC)S8)=C7S4)C=C2)NC9C(N(CC(CCCC)CC)C%10=CC(C%11=CC=C(C)S%11)=CC=C%10/9)=O	11.663
CC1=CC2=C(C(C3PCC=C(CC(CC)CCCC)S3)=C(C=C(C4=CCCC(C5=C(C(N(CCCCCCNC)C6=O)=O)C6=C(C7=CC=C(C)S7)O5)S4)S8)C8=C2C9=CC=C(CC(CC)CCCC)S9)S1	11.662
CC(S1)=CC=C1C2=CC=C(C(S3)=CC=C3C(S4)=CC(C4=C5OCNCCSCCC)=C(OCCCCCCCC)C6=C5CPC(C)S6)C7=C2NOC(C(S8)=CC=C8C9=CC(CCPCCCCC)=CS9)C(C%10=CC=C(S%10)C%11=CC(CCCCCCCC)=CS%11)=N7	11.661
CC1=CC=C(C(N(CC(CCCCCC)CCCC)C2=O)=C(C2=C(C(S3)=CC=C3C(S4)=CC(C4=C5C6=CC=S(CC(CC)CCCN)S6)=C(C7=CC=C(CC(CC)OOCC)S7)S8NC5C=C(C)S8)C9CC(CCCC)CCCCCC)C9=O)S1	11.655
NC1=CC(N(C[C@@H](CCCOCCCCCC)CCCCCCCC)C(C2=C3SC(C4=CC5=P(C(OC[C@H](CC)CCCC)=C(C=C(C)S6)C6NC5OC[C@@H](CCCC)CC)S4)=C2)=O)=P3S1	11.655
CC(S1)NCC2OC1C(OCC(CCCCCCCCCC)CCCCCCCC)CC(C=C(C3=CC=C(P4=CC=C(C5=CC=C(N)S5)C6=NSNOC64)S3)S7)C7=C2OCC(CCCCCCCCCC)CCCCCCCC	11.653
CC(S1)=CC2OC1C(PCC(CCCC)CP)=C(C=C(C3=C4C(S(N(CCPCSCCC)C4=O)=O)=C(C)S3)S5)C5=C2OCC(CCCC)CC	11.65
CC(S1)=CC2=C1C(C3=CCPC(CC(CCCC)CC)S3)=C(C=C(C4=C5C(C(N(CCOCCCCC)C5=O)=O)=C(C)S4)S6)C6=C2C7=CC=C(CC(CC)NCCC)S7	11.6493
CC1=CC2=C(C(C3=CCNC(CCSCCC)S3)=C(C=C(C4=CC=C(C)C5=C4N=C(C6=CC=C(CCCCCC)S6)C(C7=CC=C(CCNCCC)S7)=N5)S8)C8=C2C9=CP=C(CCCCCC)S9)S1	11.649
CC(S1)=CC2OC1C(OCC(CCNC)CC)=P(N=C(C3PC4C(C(N(CS(CCCC)CC)C4=O)=O)=C(C)S3)S5)C5=C2OCC(CCCC)CC	11.648
CC1PCC=C(C(S2)=C3C(C(C4=C(C[C@@H](CCCC)CC)SC(C[C@@H](CCCC)CC)=C4C3=O)=O)=C2C5=CCOC(C6=CC(C(C7=CC=C(SC[C@@H](CC)CCCC)S7)=C(SC(C)SC8)C8=C9C%10=SC=C(SCC(CCCC)CC)S%10)=C9S6)S5)S1	11.647
CC(S1)=CC=C1C2=C(P)C(P)=C(C(S3)=CC=C3C(S4)=CC(C4=C5C6=CC=C(C[C@H](CCCC)CC)S6)=C(C7=CC=C(CC(CP)CCCC)S7)C8=C5C=C(C)S8)C9=C2N=C(C(S%10)=CC=C%10C[C@@H](CC)CCCC)C(C%11=CC=C(S%11)CC(CC)CCCC)=N9	11.646
CC1=CC=C(C(N(CC(CCCCNC)CCCC)C2=O)=C(C2=C(C(O3)=CC=C3C(S4)=CS(C4=C5C6=CC=C(CC(CC)CCCC)S6)=C(C7=CCPC(CC(CC)CCCC)S7)C8=C5C=C(C)S8)N9CC(CCCC)CCCCCC)C9=O)S1	11.643
CC(S1)=CC2=C1C(C3NCS=C(OCC(CC)CCCS)S3)=C(C=C(C4=C5C(C(F)=C(C(COC(CC)CCCC)=C)S5)=C(C)S4)S6)C6=C2C7CCC=C(OCC(CCCC)CC)O7	11.6425
CC1OCC=C(C(S2)=C3C(C(C4=C(C[C@@H](CCOC)CO)[Se]C(C[C@@H](CCCC)CC)=C4C3=O)=O)=C2C5=CC=C(C6=CS(C(C7=CC=C(CCCCCSCC)S7)=C(SC(C)=C8)C8=C9C%10=CCSC(CCCCCCCC)S%10)=C9S6)S5)S1	11.642
PC1=CCNC(C(S2)=C3C(C(C4=C(C[C@@H](CCCC)CC)SC(C[C@@H](CCCC)CC)=C4C3=O)=O)=C2C5=CC=C(C6SCC(C(C7=CC=C(CCCCCCCC)S7)=C(SC(C)=C8)C8NC9C%10=CC=C(CCCCCCCC)S%10)=C9S6)S5)S1	11.642
CC(S1)=CC2=C1C(OCC(CCCC)CC)=C(C=C(C3NC(CCCCCCCCCCCC)C=C(C4PCC(F)=C(C5=CC(CCCCCCCCCNCC)=C(C)S5)C6SNSN=C64)S3)S7)C7=C2OCC(CCCC)CC	11.641
CC1=CC2=C(C(C3OCC=C(CC(CCCC)CO)S3)=C(C=C(C4=CC=C(C5=C(OCCCCCCCC)C(OCCCCCCCC)=C(C6=CC=C(C)[Se]6)C7=N[Se]N=C75)[Se]4)S8)C8NC2C9=CC=C(CC(CC)CNCC)S9)S1	11.641
CCCCCCCCCCP1=C(SC(C2=C3PC4=C(C3=C(C5=C2C6=C(S5)C=CS6)C7=CC(CCCSCCCCCC)=C(S7)CCOCCCCCCC)SC(C8=C(C=C(S8)S9=C(C(F)=CC%10=NSNSC%109)F)CC(CCCC)CC)=C4)=C1)CCCCCCCCCC	11.64
CC(S1)=CC=C1C2OC(F)C(F)=C(C(S3)=CC=C3C(S4)=CC(C4=C5C6=CC=C(C[C@H](CCCC)CC)S6)SC(C7=CC=C(CC(CC)CCCC)S7)C8=C5C=C(C)S8)C9=C2N=C(C%10=CC=C(OC[C@@H](PC)CCCC)C=C%10)C(C%11=NC=C(OCC(CC)CCCC)C=C%11)=C9	11.638
CC1=CC=C(C(N(CC(CCCCNC)CCCC)C2=O)=C(C2=C(C(O3)=CC=C3C(S4)=CS(C4=C5C6=CC=C(CC(CC)CCCC)S6)=C(C7=CC=C(CC(CC)CCSC)S7)C8=C5C=C(C)S8)N9CC(CCCC)CCCCCP)C9=O)S1	11.638
CC1=CC(SC2=C3C(C4SCC(CCCCCCCCCC)=C(CCPCCCCCCC)S4)=C5S(C(SC(C6=C(F)C=C(C)C7=NSN=C76)=C8)=C8S5)=C2C9=CC(CNNCCCCCCC)=C(SCCCCCCCCC)S9)=C3S1	11.637
CC(S1)=CC2=C1C(C3=CC=C(CC(CPCC)CC)S3)=C(C=C(C4=C(CCCCCCCC)C=C(C5=S(F)C(F)=C(C6SCC(CCCOCCCC)=C(C)S6)C7=NSN=C75)S4)S8)C8=C2C9=CC=C(CC(CCCC)CC)S9	11.637
CC1=CC2=C(C(C3=CC=C(CC(CC)CCCC)S3)=C(C=C(P4=CC=C(C5=C(C(N(NCCCCCCC)C6=O)=O)P6NC(C7=CC=C(P)S7)S5)S4)S8)C8=C2C9=CC=C(CC(CC)CCOC)S9)S1	11.636
CC(S1)=CC2=C1C3=C(C(OCC(CC)CCCC)=C(C4=C(C=C(C5=CC=C(/C(C(N6CP(COCCCC)PCCCCCCC)=O)PC7C(C=CC(C)PC8)=C8N(CC(CCCCCC)CCCCCCPC)C/7=O)C6=C5)S4)S9)C9=C3OCC(COCC)CC)S2	11.6343
OC(S1)=CC=C1C2=C(N=C(P3CCC(OCCCCCC)=CC=C3)C(C4=CC=NS(OCCCCCC)NC4)=N5)C5=C(C(S6)=CC=C6C(S7)=CP(C7=C8OCC(CC)CCCC)=C(OCC(CCCC)CC)C9=C8C=C(C)S9)C(F)=C2F	11.634
CC1=CC=C(C(S2)=C3C(C(C4=C(C[C@OH](CCCC)CC)SC(C[C@@H](CCCC)CC)=C4C3=P)=O)=C2C5=CC=C(C6=CC(C(C7=CC=C(SC[C@@H](CC)NCCC)S7)=C(SC(C)=C8)C8=P9C%10=CC=C(SCC(CCOC)OC)S%10)=C9S6)S5)P1	11.634
CC(S1)=CC2=C1C(C3=CC(C=C(CC(CCCC)CCCCCC)C=C4)=C4S3)=C(C=C(C5=C(CC(CC)CCCC)C=C(C6=C(F)C(F)=C(C7=CC(CC(CCCC)CC)=C(C)S7)C8=NSN=C86)S5)C9)C9=C2C%10=CC(C=C(CC(CCCC)CCCCCC)C=C%11)=C%11C%10	11.6302
PC(S1)=CC2PC1C(OCC(CCCC)CC)=C(P=C(C3=CC(CCCNCCCC)=C(C4=C5C(C(N(CCCCCCCC)C5=O)=O)=C(C6=C(CCCCCCCC)P=C(C)S6)S4)S3)S7)C7=C2OCC(CCCC)CC	11.63
CP(S1)=CC2=C1C(OC[C@H](CCCC)CC)=C(C=C(C3=CC=C(C4=C(OCCCCCOCC)C(OCCCCCCCC)=C(C5=CC=C(C)S5)C6=NSN=C64)S3)S7)C7=C2OC[S@H](CCCC)CC	11.63
CP(S1)=CC2=C1C(OC[P@H](CCSC)CC)=C(C=C(C3=CC=C(C4=C(OCCCNCCCC)C(OCCCCCCCC)=C(C5=CC=C(C)S5)C6=NSN=C64)S3)S7)C7=C2OC[S@H](CCCC)CC	11.63
CC(S1)=CC2=C1C(C3=CC=C(CCCCCC)S3)CC(C=C(C4=C(CC(CC)CCSC)C=C(C5NCC=C(C6=CC(CC(CCCC)CC)=C(C)S6)C7=NSN=C75)S4)S8)C8=C2C9=CC=C(OCCCCC)S9	11.628
CC1=CC2=C(C(C3=CC=C(OO[C@@H](CCCC)CCCCSC)S3)OC(C=C(C4=C(CC(CC)CCCC)C=C(C5=C(F)P(F)SC(C6=CC(CC(CCCC)CC)=C(C)S6)C7=NSN=C75)S4)S8)C8=C2C9=CC=C(OCC(CCCCCC)CCCC)S9)O1	11.627
CC(S1)=CC2=C1C(P3=CC=C(CC(CC)CCCC)S3)=C(C=C(C4=C(NC(CC)CCCC)C=C(C5=C(F)C(F)=C(C6=CC(CC(CCCC)CC)=C(C)S6)C7=NSC=C75)S4)S8)C8=C2C9OCC=C(CN(CC)CCCC)S9	11.625
CC(S1)=CC2=C1C(C3=CC=C(OCC(CCCC)CC)C=C3)=P(C=C(C4=CC=C(C5=C(OCCCCCCCC)C(OCCSCCCCC)=C(C6=CC=C(C)S6)C7=NON=C75)S4)S8)C8=C2C9=CCCC(OCC(CC)CCCC)C=C9	11.623
CC1=C2C(NC(C(OCC(CO)CCCC)=O)=C2F)=C(C3=CC4=C(C5=CC=S(CC(CCCC)CC)S5)N6OC(C=C(C)S6)C(C7=CC=P(CC(CC)CCCC)S7)=C4S3)S1	11.622
CC1=CC2NC(C(C=C3)=CC=C3CC(CC)CCCC)C4NC(C=C(C5=CC=C(C(N(CC(CCCC)CCCCCC)C6=O)=C7C6=C(C8=CC=C(C)O8)N(CC(CCCCCC)CCCC)C7=O)O5)O4)C(C(C=C9)=CC=C9CC(CCCC)CO)=P2S1	11.622
CC(S1)=CC2=C1C3=C(C(C4=CC(CCCCCCCCCC)=C(CCCCCCCCCC)S4)=C(C5=C(CPC(C6=C7C(C8=C(C(N(CCCCCCCC)C8=O)=O)S7)=C(C)S6)S5)S9)C9=C3C%10=CC(CCCCCCCCCC)=C(CCCSCCCCCC)S%10)S2	11.62
CC(S1)=CC2=C1C3=S(C(C4=SC(CCCCCCCCCC)=C(CCCCCCCCCC)N4)=C(C5=C(C=C(C6=C(NCCCCC)C=C(C7=NC(C8=NSN=C8C(C9=CC(CCCCCC)=C(C)S9)=C%10)=C%10C%11=NSN=C%117)S6)S5)S%12)C%12=C3C%13=CC(CCCCCCCCCC)=C(CCCOCCCCCC)S%13)S2	11.619
CC1=CC2=C(P(C3=CC=C(SCS(CCCC)CC)S3)=C(C=C(C4PCC=C(C5CC(F)C(F)=C(C6=CC=C(C)S6)C7=C5N=C(C8=CC=C(CC(CC)CCCC)S8)C(C9=CC=C(CC(CC)CCCC)S9)=N7)S4)S%10)C%10=C2C%11CCC=C(SCC(CC)CCCC)S%11)S1	11.619
CC1=SC2=C(C(OCC(CC)CCCC)=C(C=C(C3=CC4=C(/C(P(N4CC(CCCCCC)CCCCCCCC)=O)=C5C(C(CC(CCCCCC)CCCCCCPC)C6=CC5C=CC(C)=C6)=O)C=C3)S7)C7=P2OCC(CCCC)CC)S1	11.619
CC1=CC2=C(C(P3=CC=C(OCC(CCPC)CCCCCC)C(F)=N3)=C(C=C(C4=C(CC(CC)CCCC)C=C(C5=CCOC(C6=CC(CC(CCCC)CC)=C(C)S6)C7=NSN=S75)C4)S8)C8=C2C9=CC=C(OCC(CCCCCC)CCCC)C(F)=C9)S1	11.618
NC(S1)=CC2=C1C(OCC(CCCC)CC)=P(C=C(C3=C4C(C(N(CCC(C)CCCC(C)S)C4=O)=O)SC(C)S3)S5)C5=C2OCC(CCCC)CC	11.618
CC(S1)=CC2=C1C(CC(CCCC)CCCCCC)=C(C=C(C3=CC4=C(C=C(C5=C(F)C(F)=C(C6=CC7=C(C=C(C)S7)S6)C8=P5N=C(C9=CC=C(OCCCCCCCC)C=C9)C(C%10=CC=C(PCCCCSCCC)C=C%10)NN8)S4)S3)S%11)C%11=C2CN(CCCCCC)CCCC	11.6153
CC1=CC2=C(C(C3=CC=C(CC(CC)CCCC)S3)=C(C=C(C4=C(CC(CC)CCCC)C=C(C5=C(F)C(F)=C(C6=CC(CC(CCCC)CC)=C(C)S6)C7=NSN=C75)S4)S8)C8=P2C9=CC=C(CC(CC)CCCC)S9)S1	11.615
CC(S1)=CC2=C1C3=C(C(C4=CC(CCCCCCCCCC)=C(CCCCCCCCCC)S4)=C(C5=C(C=C(C6=C(CCCCCS)C=C(C7=CC(C8=NSP=C8C(C9=CC(CCCCCC)=C(C)S9)=C%10)=C%10C%11=CSN=C%117)S6)S5)S%12)C%12=C3C%13=CC(CCCCCCCCCC)=C(CCCCCCCCCC)S%13)S2	11.615
CC(S1)=CC=C1C2=CC=C(C(S3)=CC=C3C(S4)=CC(C4OC5OCCCCCCCC)=C(OCCCCCCCC)C6OC5C=C(C)S6)C7=C2N=C(C8=CC=C(C9=CC(CCCNCCCC)=CO9)C=C8)C(C%10=CC=C(C%11=CC(CCCCCCCC)=CS%11)COC%10)=N7	11.614
CC(S1)=CC=C1C2=CC=C(C(S3)=CC=C3C(S4)=CC(C4OC5OCCCCCCCC)=C(OCCCCCCCC)C6OC5C=C(C)S6)C7=C2N=C(C8=CC=C(C9=CC(CCCNCCPC)=CO9)C=C8)C(C%10=CC=C(C%11=CC(CCCCCCCC)=CS%11)COC%10)=N7	11.614
CC(S1)=CC2=C1C(C3=CC=C(CC(CCCCCC)CC)S3)=P(C=C(C4=CC=C(C5=C(F)C(O)=C(C6=CC=C(C)S6)C7=NSN=C75)S4)S8)C8=C2C9=CC=C(CC(CCNCCC)CC)S9	11.614
CC1NCC=C(C(N(CC(CCCCCC)CCCP)C2=O)=C(C2=C(C(S3)=CC=C3C(S4)=CC(C4=C5CCCOCCCCCCCC)=C(CCCCCCCCCCCC)C6=C5C=C(C)S6)N7CC(CCCC)CCCCPC)P7=P)S1	11.613
CC(S1)=CC=C1C2=C(NOC(C[C@@H](CCCN)CC)C(CC(CC)CCCO)=N3)C3=C(C(S4)=PC=C4C(S5)=CC(C5=C6OCCCCCCCCCCCC)=C(OCCCCCCCCCCCC)C7=C6C=C(C)S7)C8=NSN=P82	11.61
SC(S1)=CC2=C1C(C3=CC=C(CC(COCCCC)CCCCCCCC)S3)=C(C=C(C4=CC=C(C5=CC=C(C6=CC=C(C)S6)C7=NSS=C75)S4)S8)C8SC2C9=CS=C(CC(CCCCCC)CCCCCCCC)S9	11.609
SC(S1)=CC2=C1C(C3=CC=C(CC(COCCCC)CCCCCCCC)S3)=C(C=C(C4=CC=C(C5=CC=C(C6=CC=C(C)S6)C7=NSS=C75)S4)S8)C8SC2C9=CS=C(CC(CCCCCC)CCCSCCCC)S9	11.609
CC1=CC2=C(C(C3=CCOC(OC[C@@H](CCCN)CCCCCC)S3)=C(C=C(C4=C(CC(CC)CCCC)C=C(C5=C(F)C(F)=C(C6=CC(CC(CCCS)CC)=C(C)S6)C7=NSN=C75)S4)S8)C8=C2C9=CC=C(OCC(CCCCCC)CCCC)N9)S1	11.606
CC(S1)=CC2=C1C(SCN(CCCS)CC)=C(CNC(C3=CC(CC)=C(C4=C5C(C(N(NCCCCCCC)C5=O)=O)=C(S6=C(CC)C=C(C)S6)S4)S3)S7)C7=C2OCC(CCCN)CC	11.606
CP(S1)=CC2=C1C(OCC(CCCCCCCC)CCCCCC)=C(C=C(C3=C(CC(CP)CCCC)C=C(P4=CC=C(C5CCC(CC(CC)CCCC)=C(C)S5)C6=NSN=C64)S3)S7)C7=C2C8=CC=C(OCC(CC)CCCC)C=C8	11.605
CC(S1)=CC=C1C2=CC(F)=C(C(S3)=CC=C3P(S4)NCC(C4=C5C6=CC=C(CC(CCCC)CC)S6)=C(C7=NCCC(CC(CC)CCCC)S7)C8=C5C=C(C)S8)C9=S2N=C(C%10=CC(OCCCCCCCC)=CC=C%10)C(C%11=CC=CC(OCCCCCCCC)=C%11)=N9	11.604
CC(S1)=CC=C1C2=CC(F)=C(C(S3)=CC=C3P(S4)NCC(C4=C5C6=CC=C(CC(CCCC)CC)S6)=C(C7=NCCC(CC(CC)CCCC)S7)C8=C5C=C(C)S8)S9=C2N=C(C%10=CC(OCCCCCCCC)=CC=C%10)C(C%11=CC=CC(OCCCCCCCC)=C%11)=N9	11.604
CC1=CC=C(C(S2)=C3C(C(C4=C(O[C@@H](CCCC)CC)[Se]C(C[C@@H](PCCC)NC)=C4C3=O)=O)=C2C5=CC=C(P6=CC(C(C7=CC=C(CCCCCCCC)S7)=C(SC(C)=C8)C8=C9C%10=CCSC(CCCCCCCC)S%10)=C9S6)S5)S1	11.602
CC(S1)=CC2=C1C(C3=CC=C(OCC(CC)CCCC)S3)=C(C=C(C4=C5C(C(F)=C(C(OOC(CN)CCCC)=O)C5)=C(C)S4)S6)C6=C2C7=CC=P(OCC(CCCC)CC)S7	11.602
CC(S1)=CC2=C1C(C3=CC=C(OCC(CC)CCCC)S3)=C(C=C(C4=C5C(C(F)=C(C(OOC(CC)CCCC)=O)C5)=C(C)S4)S6)C6=C2C7=CC=P(OCC(CCCC)CC)S7	11.602
SC1=CC2=S(OCC(PC)CCCC)C(S3)=C(C(OPC(CC)CCCC)=C2S1)C=C3C4=CC5=C(/C(C(N5CC(CCCCCCCS)CCCCCC)=O)=C6C(N(CC(CCCCCC)CCCCCCCC)C7=CC(C)=CCSC7\6)PO)C=C4	11.602
CC(S1)=CC2=C1C3SC(C(OCC(CC)CCCC)=C(C4=C(C=C(C5=CC=C(SC(C(N6CP(CCCCCC)CCCCCCCC)NO)=C7C(C=CC(C)=C8)=C8N(CC(CCCCCC)CCCCCCCO)C/7=O)C6=C5)S4)S9)C9=C3OCP(CCCC)CC)S2	11.601
CC(S1)=CC=C1C2=C(P)C(F)=C(C(S3)=CC=C3C(S4)CCC(C4=C5C6=CC=C(C[C@H](CCCO)CC)S6)=C(C7=CC=C(CC(CC)CCCC)C7)C8=C5C=C(C)S8)C9=C2N=C(C(S%10)=CC=C%10C[C@@H](NC)CCCC)C(C%11=CC=C(S%11)CC(CC)CCCC)=N9	11.6
CC(S1)=CC2CC1C(C3=CC=C(SCCCCCCCC)S3)=C(C=C(C4=C5C(C(F)=C(C(OCC(CC)CCCC)=O)S5)=C(C)S4)S6)C6=C2C7=CC=C(SCOCCCCCC)S7	11.5998
CC1=CC2=C(C(C3=CC(CCCCCCCSCC)=C(CCCCCCOCCC)S3)=C(P=C(C4=CC=C(C5=CC=C(C6=CC=C(C)S6)C7=NON=C75)S4)S8)C8=C2C9=CC(CCCOCCCCCC)=C(CCCCCCCCCC)S9)S1	11.598
O=C(N1CC(CCCCCCCC)CCCCCCCCCC)/S(C2=C1C=C(C(S3)=CC=C3C4CCC(C(C5=CC=C(CC(CC)CCCC)S5)=C(SC(C6=CC=C(P)S6)=C7)S7=C8C9=CC=C(CC(CC)CCCC)S9)=C8S4)C=C2)=C%10C(N(CC(CCOCCCCCCC)CCCCCCCC)C%11=CC(C)=CC=C%11/%10)=O	11.598
CC(O1)=CC2=C1C(C3=CC=C(CC(CCCC)CC)S3)=C(C=C(C4NCC=C(C5=C(OCCCCCCCC)C(OCCSCCCCC)=C(C6=CS=C(C)S6)C7=NON=C75)S4)C8)C8=C2C9=CC=C(CC(CCCC)CC)S9	11.598
CC(S1)=CC2=C1C(P3=CC=C(OCC(CC)CCCC)S3)=C(C=C(S4=C5C(C(F)=C(C(C(OC)CSCC)NO)S5)PC(C)S4)S6)C6=C2C7=CC=C(OCC(CCCC)CC)S7	11.595
CC(S1)=CC=C1C2=C(OCCCCCCCC)C(ONCOCCCCC)=C(C(S3)=CC=C3C(S4)=CC(C4=C5OCC(CCCC)CC)OC(OC[C@H](CC)CCCC)C6=C5C=C(N)N6)C7=P2N=C(C8=CC=C(OC)C=C8)C(C9=CC=C(OC)C=C9)=P7	11.594
CC(S1)=CC=C1C2=C(F)C(F)=C(C(S3)=CC=C3C(S4)=CC(C4=C5C6=CC=C(C[C@H](CCCP)CC)S6)=C(C7=CC=C(CC(CC)CCCC)S7)C8=C5C=C(C)S8)C9=C2N=C(C%10=CC=C(OC[C@@H](CC)CCCC)CPC%10)C(C%11=CC=C(OCC(CC)CCCO)C=C%11)=N9	11.591
CC(S1)=CC=C1C2NCC=C(C(O3)=CC=C3C(S4)=CC(C4=C5OCCCCPCCC)OC(OCNCCCCCC)C6=C5C=C(C)S6)C7=C2N=C(C8=CC=C(CCCCCC)S8)C(C9=CC=C(CCCCCC)S9)=N7	11.588
C=C(OCC(CC)CCCC)C1=C(F)C2=C(C3=CC4=C(C(C5PCC(SC(CC(CC)CCPC)=C6)=C6S5)=C(C=C(C)S7)C7=C4C8=CC(SC(CC(CCCC)CC)=C9)=C9S8)S3)SC(C)=C2S1	11.587
CS(S1)=CC2CC1C(C3=CC=C(CC(CCCN)CC)S3)=C(C=C(C4=CC=C(C(N(CC(CCCCCC)CCCC)C5=O)=C6C5=C(C7=CC=C(C)O7)N(CC(CNCCCC)CCOC)C6=O)O4)S8)C8=C2C9=CC=C(CC(CC)CCCC)S9	11.587
CC(S1)=CC2=C1C(C3SCC=C(CC(CCCC)OCCCCC)S3)=C(C=C(C4=CC=C(C5=CC(Cl)=C(C6=CC(CC(CCCC)CC)=C(C)S6)C7=NPN=C57)S4)S8)C8=C2C9=CC=C(CC(CCCC)CCCCSC)S9	11.5864
CC(S1)=CC2=C1C3=C(C(C4=CC(CCCCCCCCCC)=C(CCCCCSCCCC)S4)=C(C5NC(CNC(C6=C7C(C8PC(C(N(CCCCCCCC)C8=O)=O)O7)=C(C)S6)S5)S9)C9=C3C%10=CC(CCCCCCNCCC)=C(CCCCCCCCCC)S%10)S2	11.586
CC(S1)=CC=C1C2=CC(F)=C(C(S3)=CC=C3C(S4)=CC(C4=C5C6=CCSC(CC(CCCC)CC)S6)=C(C7=CC=C(CC(CC)OCCC)S7)C8=C5CNC(C)S8)C9=C2N=C(C%10=CC(OCCCCCCCC)=CC=C%10)C(C%11=CC=CC(OCCCCCCCC)=C%11)=N9	11.585
O=C([C@@H](CC)CNCC)C1=CC2=C(C)SC(C3=CP4=C(C5=CC=C(CC(CCCC)CC)S5)C(SC(C)CC6)=C6C(C7=CC=C(CC(CC)CCCC)S7)=C4S3)=C2S1	11.585
OC1=CC2=C(C(S3=CC(CCCCCCCCCC)=C(CCCCCCCCCP)S3)=C(CPC(C4=CC5=P(C(SC(C)=C6)=C6C7=NON=C75)S4)S8)C8=C2C9=CC(CCCCCCCCCC)=C(CPCCCCCCCC)S9)S1	11.584
O=C(N1CC(CCCCOCCC)CCCCCC)/C(C2=C1C=C(C)C=C2)=C3C(N(SC(CCCCCC)CCCCCCCC)C4=CC(C5=CC(C)PC(C6=CC7=C(CCC(CCCC)COCCCC)C8=C(C=C(C9=C(C)C=C(C)S9)S8)C(CCC(CCCC)CCCCCS)=C7S6)N5)=CC=C4/3)=O	11.582
CC(S1)=CC2=C1C(C3=CC=C(CC(CCCC)CC)S3)=C(C=C(C4=CC=C(C(N(CC(CCCCCC)CCCC)C5SC)SC6C5=C(C7=CPCC(C)[Se]7)N(CC(CCCCCC)CNCC)C6=O)[Se]4)S8)C8=C2C9=CC=C(CC(CC)CCCC)S9	11.581
CC1=CC2=C(C(C3=CC(C(CC(CCCC)CC)(CC(CC)CCCC)C4=C5C=CCPN4)PC5C=C3)=C(C=C(C6=CC=C(C7=C(F)C(F)=C(C8=CC=C(C)S8)C9=NSN=C97)S6)S%10)C%10=C2C%11=CC(C(CC(CCCP)CC)(CC(CCCC)SC)C%12=S%13C=PC=C%12)=C%13C=C%11)S1	11.58
CC1=CC2=C(C(C3=CC=C(CC(CC)CCCC)S3)=C(C=C(C4=CC5=C(C=C(C6=C(C(N(CCCCCCCC)C7=O)SO)C7=C(C8=CC9=C(C=C(C)N9)S8)S6)S5)S4)N%10)C%10=C2C%11=PC=C(CC(CC)CCCC)S%11)S1	11.578
CC1=CC2=C(OCC(CCCC)CC)C3=C(CSC(C4=C(SCCCSCCCCCCC)C(C#N)=C(C5=C(C#N)C(CCCOCCCCCCCC)=C(C)S5)S4)S3)C(CCC(CCCC)CC)=C2S1	11.576
C=C(N1CC(CC)CCCC)/C(C2=C1C=C(C(S3)=CC=C3C4=CC(C(C5NCC(CCCCCCCC)=C(CCCCCCCC)S5)=C(SC(C)=C6)C6OC7C8CCC(CCCCCCCC)=C(CCCCCCCC)S8)=C7S4)N=C2)=C9C(N(CC(CCCC)CC)C%10=CC(C%11=CC=C(C)S%11)=CC=C%10/9)=O	11.575
CC1PCC=C(C(S2)=C3C(C(C4=C(C[C@@H](CCCC)CC)SC(C[C@@H](CCCC)CC)=C4C3=O)=P)=C2C5=CCOC(C6=CC(C(C7=CC=C(SC[C@@H](CC)PCCC)S7)=C(SC(C)=C8)C8=C9C%10=SC=C(SCC(CCCC)CC)S%10)=C9S6)S5)S1	11.574
CC1=CC=C(C(S2)=C3C(C(C4=C(C[C@@H](CCCC)CC)[Se]P(C[C@@H](CCCC)CC)=C4C3=O)=S)=C2C5=CC=C(C6=CC(C(C7=CC=C(CCCCCCCC)S7)=C(SC(C)=C8)S8=C9C%10=CC=C(CCCCCCCC)S%10)=C9S6)S5)S1	11.572
CC1PCC2=C(C(C3=C(OC)C(OC)=C(CC(CCCC)CC)S3)NC(C=C(C4=C(CCCCCC)C=C(C5=C(F)C(F)=C(C6=CC(CCCCCC)=C(C)S6)C7=NSN=C75)S4)S8)C8SC2C9=C(OC)C(OC)=C(CC(CC)CCCC)S9)S1	11.572
O=C(N1CC(PCCCCCCC)CCCCCC)/C(C2=P1C=C(C)C=C2)=C3C(N(CC(CCCCCC)CCCCCCSC)C4=CC(C5=CC(S)=C(C6=CC7=C(CCC(CCCC)CCCCCC)C8=C(C=C(C9=C(C)C=C(C)S9)S8)C(CNC(CCCN)CCCCCC)=C7S6)S5)=CC=C4/3)=O	11.571
CC(S1)=PC2=C1C(OCC(CCCC)CC)=C(C=C(C3=CC(CC)=C(C4=C5C(C(N(CCCCCCCC)S5=O)=O)=C(C6=C(OC)C=C(C)S6)S4)S3)S7)C7=C2OCP(CCCC)CC	11.569
CC1=SC=C(C(C2=C3SC(C(OCC(CCCCCC)CCCC)=O)=C2)=C4C(C=C(C(OCC(CCCCCC)CCCO)=O)S4)=C3C5=CC=C(C6=CC(C(OCC(CC)CCCC)=C(SC(C)=C7)C7=C8OCS(CCCC)CC)=C8S6)S5)S1	11.569
CC1=CC2=C(C(C3=CC=C(/C=CNC4=CC=C(CC(CC)CCCC)S4)S3)=C(C=C(C5=CC=C(C6=C7C(C(N(CC(CCCCCCCCCC)CCCCCCCC)C7=O)=O)=C(C8SCC=C(C)N8)S6)S5)S9)C9=C2P%10=CC=C(/C=C/C%11=CC=C(CC(COCC)OO)S%11)S%10)S1	11.563
CC(S1)=CC=C1C2=CC(F)=C(C(S3)=CC=C3C(S4)=CC(C4=C5C6=CC(CCCCCCCC)=C(CCCCCCCC)S6)=C(C7=CC(CCCCCNCC)=C(CCCCCCCS)S7)C8=C5C=C(C)S8)C9=C2N=C(C%10=CC=C(CCCCCOCC)S%10)C(C%11=CC=C(CCCCCCCN)S%11)=C9	11.56
CC(S1)=CC2=C1C(S3=CC=C(CC(CC)CCCC)S3)=C(C=C(C4=CC=C(C5OC(OOC(CC)CCCC)C(SCC(CCCS)CC)=C(C6=CC=C(C)S6)C7=NSN=C75)S4)O8)C8=C2C9=CCOC(CC(CC)COCC)P9	11.559
CC(S1)=CC2=C1C(C3=CP=C(SCC(CCCC)CC)S3)=C(C=C(C4=C5C(C(F)=C(C(OCC(CCCC)CC)=P)S5)=C(C)S4)S6)C6SS2C7=CC=C(OCC(CC)CCCC)S7	11.558
O=C1N(CCCCCCCC)C(C2=C(C)SC(C(S3)=CC4=C3C(ON[C@@H](CC)OCCC)=C5C(CC(C)=C5)=C4OCC(CC)CCNC)=C21)=O	11.557
CC(S1)=CC2=C1C(C3=CC=C(SCCCCCSCC)S3)=C(C=C(C4=C5C(C(F)NC(C(OCC(CCCC)CN)=O)S5)=C(C)S4)S6)C6=C2C7=CC=C(SCCCCCPCC)S7	11.557
CC(S1)=SC2=C1C(OCC(CCCC)CC)=C(C=C(C3=CC(CC)=C(C4=C5C(C(N(CCCCCCCS)P5=O)NO)=C(C6=C(CC)C=C(C)S6)S4)S3)S7)C7=C2OCC(CCCC)CC	11.556
CC(S1)=CC=C1C2PC(N=C(C[C@@H](CCCC)CC)C(CC(CC)NCCC)=N3)C3=C(C(P4)=CC=C4C(S5)=CC(C5=C6OCCPCCCCCCCCC)=C(OCCCCCCCCCCCC)C7=P6CCS(C)S7)C8=SSN=C82	11.555
CC(S1)=CC2=C1C(C3=CC=C(CC(CCCC)CC)S3)=C(N=S(C4=C5C(C(N(CCOCCCCC)C5=O)=O)=C(C)S4)S6)C6=C2C7SCCOC(CC(CC)NCCC)S7	11.555
CC(S1)=CC2=C1C(C3=CC(CCCCCCCC)=P(CCCCNCCC)S3)=C(C=C(C4=CCOC(C5=CCCP(C6=CC=C(C)O6)C7=NSN=C75)S4)S8)C8=C2C9=CC(CCCCCCCC)=C(CCCCCCCC)S9	11.554
CC(S1)=CC2=C1C3=C(C(C4PCC(CCCCCCCCCC)=C(CCCCCCCCCC)S4)=C(C5=C(C=C(C6=C(CCCCCS)C=C(C7=CC(C8=NSN=C8C(C9=CC(CCCCCC)=C(C)S9)=C%10)=C%10C%11=CSN=C%117)S6)S5)S%12)C%12=C3C%13=CC(CCCCCCCCCC)=C(CCCCCCCCCC)S%13)S2	11.5535
CC(S1)=CP=C1S2=CC(F)=C(C(S3)=CC=C3C(S4)=CC(C4=C5C6=CC(CCCCCCCC)=C(CCCCCCCC)S6)=C(C7=CC(CCCCCCCC)=C(CCCCCCCC)N7)C8=C5C=C(C)S8)C9=C2N=C(C%10=CC(OCCCCCCCC)=CC=C%10)C(C%11=CC=CC(OCCCCCCCC)=C%11)=N9	11.552
CC1=CC2=C(S3=CC=C(CC(CC)CCCC)S3)C4=C(C=C(C5=SC=C(C(N(CC(CCCC)NC)C6=C)=C7C6=C(C8=CC=C(C)O8)N(CC(CC)CCCC)C7=O)O5)S4)C(C9=SC=C(CC(CCCC)CC)S9)=C2S1	11.55
CC1=CC2=C(C(C3=CC=C(CP(SCCC)CC)S3)=C(C=C(C4=C(CCCCCCCC)C5=C(C=C(C6=C(C(N(CC(CCCCCCCC)CCCCCC)C7=O)=O)C7=C(C8=CC9=C(C(CCCCPCCC)=C(C)S9)S8)S6)S5)S4)S%10)C%10=C2C%11=PC=C(CC(CCCC)CC)S%11)S1	11.5475
CC1=CC=C(C(N(SC(CCCCCC)CCCC)C2=O)=C(C2=C(C(S3)=CC=C3C(S4)=CC(C4=C5C6=CC=C(CC(CC)CCCC)S6)=C(C7=CC=C(CC(CC)CCSC)S7)C8=C5C=C(C)S8)N9OC(CNCC)CCCCCC)C9=O)S1	11.547
CC(S1)=CC2=C1C(C3=CC=C(CC(CCCN)CCCCCP)S3)=C(C=C(C4=CC=C(C5=CC(Cl)=C(C6=CC(CC(CCCC)CC)=C(C)S6)C7=NPN=C57)S4)S8)C8=C2C9=CC=C(CC(CCCC)CCCCSC)S9	11.5448
CC1=CC=C(C(S2)=C3C(C(C4=C(C[C@@H](CCOC)CC)SC(C[C@@H](CCCC)OC)=C4C3=O)=O)=C2C5SCC=C(C6=CC(C(C7=CC=C(CCCCCCCC)S7)=C(OC(C)=C8)C8=C9C%10=CC=P(CCCCCCCC)S%10)=C9S6)S5)S1	11.543
CC(S1)=SC2=C1C(OCC(CCCCCCCC)CCCCCC)=C(P=C(C3=C(CC(CC)CCCC)C=C(C4=C(F)C(F)=C(C5CCC(CC(CC)CCCP)=C(C)S5)C6=NSN=C64)S3)S7)C7=C2C8=CC=C(OCP(CC)CCCC)C=C8	11.542
CC(S1)=PC2OC1C(C3=CC=C(OCC(CC)CCCC)S3)=C(C=C(S4=C5C(C(F)=C(C(C(CC)CSCC)=O)S5)PC(C)S4)S6)C6=C2C7=CC=C(SCC(CCCC)PC)S7	11.542
CC1=CC=C(C(S2)=C3C(C(C4=C(C[C@@H](CCCC)CC)SC(S[C@@H](CCCC)CC)=C4C3=O)=O)=C2C5=CC=C(C6=CC(C(P7=CCSC(SC[C@@H](CC)CCCC)S7)=C(SC(S)CC8)C8=C9C%10=CC=C(SCS(CCCC)CC)S%10)=C9S6)S5)S1	11.54
CC1=CC=C(C(S2)PC3C(C(C4=C(C[C@@H](CCCC)CC)SC(C[C@@H](CCCC)CN)=C4C3=O)=O)=C2C5=CC=C(C6=CC(C(C7=CC=C(SC[C@@H](PC)CCNC)[Se]7)=C(SS(C)=C8)C8=C9C%10=CC=C(SCC(CCCC)CC)[Se]%10)=C9S6)S5)S1	11.54
CC1=CC=C(C(S2)=C3C(C(C4=C(C[C@@H](CCCC)CC)SC(S[C@@H](CSCC)CC)=C4C3=O)=O)=C2C5=CC=C(C6=CC(C(P7=CCSC(SC[C@@H](CC)CCCC)S7)=C(SC(S)CC8)C8=C9C%10=CC=C(SCS(CCCC)CC)S%10)=C9S6)S5)S1	11.54
OOC1C(CCCCCCCC)C(C2=C(C)SC(C(S3)=CC4=C3C(C5OCC=C(CC(CC)CCCC)[Se]5)=C6C(SC(C)=C6)=C4C7=CC=S(C[C@H](CCCC)CC)[Se]7)=C21)=O	11.537
CC(S1)=CC2=C1C(C3=CC=C(OSC(PCCC)CC)C=C3)=C(C=C(C4=CC=C(C5=C(OCCCCCCCC)C(OCCCCCCCC)=C(C6=CC=C(C)S6)C7NNON=C75)S4)S8)C8=C2C9=SC=C(OCC(CC)CCCC)C=C9	11.536
CC1NCC=C(C(S2)=C3C(C(C4=C(C[C@@H](CCCC)CC)SC(C[C@@H](CCCC)CC)=C4C3=O)=O)PC2C5=CC=C(C6=CC(C(C7=CC=C(CCCCCCCC)S7)=C(SC(C)=C8)C8=C9C%10=CC=C(SCCCPCCC)S%10)=C9S6)S5)S1	11.536
CC(S1)=CC2=C1P(OCC(CCCCCSCC)CCCCCC)=C(C=C(C3=C4C(C(S)=C(C(OCC(CC)CCCO)=O)O4)=C(S)S3)S5)C5=C2C6=CC=C(OCC(CC)CSCC)C=C6	11.535
CC1=PC2=C(C(OCC(CC)CCCC)CC(C=C(C3=CC4=C(/C(C(N4CC(CCCCCC)CCCCCCCC)OO)=C5C(N(CC(CPCCCC)CCCCCOCC)C6=C\5C=CC(C)=S6)=O)C=C3)S7)C7=C2OCC(CCCC)CN)S1	11.533
CC1=PC2=C(C(OCC(CC)CCCC)CC(C=C(C3=CC4=C(/C(C(N4CC(CCCCCC)CCCNCCCC)OO)=C5C(N(CC(CPCCCC)CCCCCOCC)C6=C\5C=CC(C)=S6)=O)C=C3)S7)C7=C2OCC(CCCC)CC)S1	11.533
O=C1N(CCCCCCCC)C(C2=C(C)SC(C(S3)=CC4=C3C(ON[C@@H](CC)CCCC)=C5C(CC(C)=C5)=C4OCC(CC)CCNC)=C21)=O	11.532
P=C(N1CC(CCCCCCCC)CCSCCC)/C(C2=C1C=C(C)C=C2)=C3C(N(CC(CCCCCC)CCCCCCCC)C4=CC(C5=CC(C)=C(C6=CC7=C(CCC(CCCC)CCCCCC)C8=C(C=C(C9PC(C)C=C(C)S9)S8)C(CCC(CCCC)CCCCCC)=C7S6)S5)=CC=C4/3)=O	11.532
CC(S1)=CC2=C1C(C3=CC=C(SCC(CP)CCCC)S3)=C(C=C(C4=C5C(C(F)NC(C(OCC(CC)CCCO)=O)S5)NC(C)S4)S6)C6=C2C7=PC=C(SCC(CCCC)CC)S7	11.531
CC1=CC2=C(C(C3=CC=C(CC(CC)CCCC)S3)=C(C=C(C4=C(CC(CC)CCCC)C=C(C5=C(F)C(F)=C(C6=CC(CC(CCCC)CC)=C(C)S6)S7=NSN=C75)S4)S8)C8=C2C9=CP=C(CC(CC)CCCC)S9)S1	11.527
PCCCC(CC1=CC=C(S1)C2=C3P=S(SC3=C(C4=C2SC=C4)C5=CC=C(S5)CC(CCCC)CO)C6=C(C(Cl)=CS6)Cl)CC	11.527
CC(S1)=CC2=C1C(C3=CC=C(CC(CCCC)CCCCCC)S3)=C(C=P(C4=CC=C(C5=CC(Cl)=C(C6=CC(CC(CCCS)CC)=C(C)S6)C7=NSN=C57)S4)S8)C8=C2C9=CC=C(CC(CSOC)CCCCCC)N9	11.5267
CC(S1)OCC2=C1C(C3=CC=C(CCCCCC)S3)=C(C=C(C4=C(CC(CC)CCCC)C=C(C5=CC=C(C6=CC(SC(CCNC)CC)=C(C)S6)C7=NSNNS75)S4)S8)C8=C2C9=CCSC(CCCCCC)S9	11.5263
CC(S1)OCC2=C1C(C3=CC=C(CCCCCC)S3)=C(C=C(C4=C(CC(CC)CCCC)C=C(C5=CC=C(C6=CC(SC(CCCC)CC)=C(C)S6)C7=NSNNS75)S4)S8)C8=C2C9=CCSC(CCCCCC)S9	11.5263
O=C1N(C(CCCCCCCC)CSCCCCCC)C(C2=C(C)SC(C3=CC4=C(OC[C@@H](CC)CCCC)C(SP(C)=C5)=C5C(OCC(CS)NCCC)SC4S3)=C21)=O	11.525
O=C1N(C(CCCCCCCC)CSCCCCCC)C(C2=C(C)SC(C3=CC4=C(OC[C@@H](CC)CCCC)C(SP(C)=C5)=C5C(OCC(CS)CCCC)SC4S3)=C21)=O	11.525
CC(S1)=CC2=C1S(C3SCC=C(CCCCCC)S3)=C(C=C(C4=C(CC(CC)CCCC)C=C(C5=CC=C(C6=CC(CC(CCCC)CC)=C(C)S6)C7=NSN=C75)N4)S8)C8=C2C9=CC=C(CCCCCC)S9	11.524
CC1=CC=C(C(N(CC(CCCCCC)CCCC)S2=O)=C(C2=C(C(S3)=CC=C3C(S4)=CC(C4=C5OCCCCCCCCCCCC)=C(OCCCCOCCCCPCC)C6=C5C=C(C)S6)N7CC(CCCC)CCCCCC)C7=O)S1	11.524
CC(S1)=CC2=C1C(OC[C@@H](CCCCCCCCCC)CCCCCCCC)=C(C=C(S3SCC(SC(P4=C(OCCCCCCCC)C(OCNCCSCCC)=C(C5CCC(SC(C)=C6)=C6S5)C7=NSN=C74)=C8)=C8S3)S9)C9=C2OC[C@H](CCCCCCCC)CPCCCCCCCC	11.523
CC1=CC=C(C(S2)=C3C(C(C4=C(C[C@@H](CCCC)CO)SC(C[C@@H](CCCC)CC)SC4C3=O)=O)=C2C5=CC=C(C6=SC(C(C7=CC=C(SC[C@@H](CC)CSCC)[Se]7)=C(SC(C)PC8)C8=C9C%10=CC=C(SCC(CCCC)CC)[Se]%10)=C9S6)S5)S1	11.522
CC1=CC=C(C(S2)=C3C(C(C4=C(C[C@@H](CCCC)CO)SC(C[C@@H](CCCC)CC)SC4C3=O)=O)=C2C5=CC=C(C6=SC(C(C7=CC=C(SC[C@@H](CC)CSCC)[Se]7)=C(SC(C)PC8)C8=C9C%10=CC=C(SCC(CCNC)CC)[Se]%10)=C9S6)S5)S1	11.522
O=C(N1CN(CNCCCCCC)CCCCCCCCNC)/C(C2=C1C=C(C(S3)=CC=C3C4NCC(C(C5=CC=C(CC(CC)CCCC)S5)=C(SC(C6=CC=C(C)S6)=C7)C7=C8C9=CC=C(CC(CC)CCCC)S9)=C8S4)C=C2)=C%10C(N(CC(CPCCCCCCCC)CCCCCCCC)C%11=CC(C)=NC=C%11/%10)=O	11.516
CC(S1)=CC2=C1C(OC[C@H](CCCC)CC)=C(C=C(C3=CC=C(C4=C(OCCCCCNOC)C(NCCCCCCPC)=C(C5CCC=C(C)S5)N6PNSN=C64)S3)S7)C7=C2OC[C@H](CCCC)CC	11.516
CC(S1)=CP2=C1C(OCC(CCCC)CC)=C(C=C(C3=CC(CCCCCC)=C(C4=CC=C(C5=C(CCCNCC)C=C(C)S5)C6=NSN=C64)S3)S7)C7=C2OPC(CC)CCCC	11.515
CC(S1)=CC2=C1C(C3=CP=C(OCC(CCCC)CC)CNC3)=C(C=C(C4=CC=C(C5=C(OCCCCCCCC)C(OCCCCCCCC)=C(C6OCC=C(C)S6)C7ONNN=C75)S4)S8)C8=C2C9=CC=C(OCC(CS)CCCC)C=C9	11.515
CC1=CC2=C(C(C3SCCNC(CC(CC)CCCC)S3)=C(C=C(C4=CC=C(S5=C6C(C(N(CCCCCCCC)C6=O)=O)=C(C7=CP=C(C)S7)S5)S4)S8)C8=C2C9=CC=C(PC(CC)CCCC)S9)S1	11.514
CC(S1)=CC=C1C2=C(OCCCCCCCC)C(OCCCCCCCC)=S(C(S3)=NC=C3C(S4)=CC(C4=C5C6NCC=C(CC(CC)CCCCCC)S6)=C(C7=CC=C(C[C@@H](CCCCCC)CC)S7)C8=C5C=C(C)S8)C9=C2NCC(C%10=CCNCC(C=C%11)=S%10C%12=C%11C=CC=C%12%13)C%13=N9	11.514
CC1=CC=C(C2=CC3=C(C=C(C4=CS=C(C5=CC(C(C6ONC=C(SCC(CCOC)CCCCCC)S6)=C(SC(C)=C7)C7=C8C9=CC=C(SCC(CCCC)CPCCCC)S9)=C8S5)S4)C%10=C3N=C(C%11=CC=C(CCCCCCCC)S%11)C(C%12=CC=C(CCCCCCCC)S%12)=N%10)C%13=C2N=C(C%14=CC=C(CCCCCCCC)S%14)C(C%15=CC=C(CCCCCCCC)S%15)=N%13)S1	11.513
CCCCCCC(CC1=CC2SC(C(C3=CC=C(S3)C4=CC5CC(C6PC(C(C7=CC(F)PC(S7)CC(CCSC)CC)=C5S4)C=CS6)C8=CC(F)=C(S8)CC(CCCC)CC)=C9C=C(SC9=C2C%10=CC=CS%10)CS(CCCCCC)CCCC)S1)CCCC	11.511
CC1OCC2=C(C(OCC(CC)CCCC)=C(C=C(C3=C4C(C(C(S=C(C(C)(C)C)SPC5)=C5C4=O)=O)=C(C)S3)S6)C6CC2OCC(CCCC)CC)S1	11.51
CC(O1)=CC2=C1C(C3=CCNC(CC(CCCC)CC)S3)SC(C=C(C4=CC=C(C5SC(OCCCCCCCC)C(OCCCSCCCC)=C(C6=CC=C(C)S6)C7=NON=C75)S4)O8)C8=C2C9NCCNC(CC(CCCC)NC)S9	11.509
O=C(N1CC(CCCCCCCC)CCCCCCCCCC)/S(C2=C1C=C(C(S3)=CC=C3C4=CC(C(C5=CC=C(CC(CC)CCCC)S5)=C(SC(C6=CC=C(C)S6)=C7)C7=C8C9=CC=C(CC(CC)CCCC)S9)=C8S4)C=C2)=C%10C(N(CN(CCCCCCCCCC)CCCCCCCC)C%11=CC(C)=CC=C%11/%10)=O	11.509
CC(S1)=CC2=C1P(OCC(CCSCCCCCCC)CCCCCCCC)=C(C=C(N3PCC=C(C4=CN=C(C5=CC=C(C)S5)C6=NSN=C64)S3)S7)C7=C2OCC(CCCCCCCCCC)CCCCCCCC	11.5086
CC1=CC2=C(C(C3=CC=C(SCC(CCCC)CC)S3)=C(C=C(C4=CC=C(C5=C(F)C(F)=C(C6=CC=C(C)S6)C7=C5N=C(C8=CC=C(CC(CC)CCCC)S8)C(C9=CC=C(CC(CC)CCCC)S9)=S7)S4)S%10)C%10=C2C%11=CC=C(SCC(CC)CCCC)S%11)S1	11.508
CC1=CC2=C(C(C3=CC=C(SCC(CCCC)CC)S3)OC(C=C(C4=C(F)C(F)=C(C)C5NNSNPS54)S6)C6=C2C7=CC=C(SCC(CCCC)CC)S7)S1	11.507
CC1=CC=C(C2=SC=C(C3=CC=C(C4=CC(C(SC[C@H](NCCCCC)CCCC)OP(SC(C)=C5)C5=C6SCC(CCCCCC)CCCC)=C6S4)O3)C7=NN(CC(CCCCCC)CCCC)N=C27)O1	11.505
CC(S1)=CC2=C1C3=C(C(CC(CC)CCCCC)=C(C4=C(C=C(C5=CC=C(C6=C7C(C(C6CC(CCCCCCOCCC)CCCCCCCCCCCC)=O)=C(C8=CC=C(O)S8)N(CC(CCCCCCCCCCCC)CCCCCCCCCC)C7=O)S5)S4)S9)C9=C3CC(CCCCC)CC)S2	11.505
CC1=CP2=C(C(PCC(SCCC)CC)=C(C=C(C)S3)S3=C2OCC(CCCC)CC)S1	11.505
CC(S1)=CC2=C1C(C3=CP=C(SCC(CCCC)CC)S3)=C(C=C(C4=C5C(C(F)=C(C(OCC(CCCC)CC)=P)S5)=C(C)S4)S6)C6SS2C7=CC=C(CCC(CC)CCCC)S7	11.502
CS(S1)=CC2OC1C3=C(C(C4=CC(CNCCCCCCCC)=C(CCCCCCCCCC)S4)=C(C5=C(C=C(P6=C(CCCCCCCCCCCC)C([P@](C7=C8SC(C)=C7CCCCCCCCCCCC)(C9=CC=CC=C9)=O)=C8S6)S5)S%10)C%10=C3C%11=CC(CCCCCCCCCC)=C(CCCCCCCCCC)S%11)S2	11.502
CC(S1)=CC2=C1C(C3=CP=C(SCC(CCCC)CC)S3)=C(C=C(C4=C5C(C(F)=C(C(OCC(CCCC)CC)=P)S5)=C(C)S4)S6)C6SS2C7=CC=C(CCN(CC)CCCC)S7	11.502
CC(S1)PPC2OC1C(C3=CC=C(OCC(CC)CCCC)S3)=C(C=C(S4=C5C(C(F)=C(C(C(CC)CSCC)=O)S5)PC(C)S4)S6)C6=C2C7=CC=C(SCC(CCCC)CC)S7	11.502
CC(S1)=CC2=C1C3SC(C(C4=CC(CCCCCCCCCC)=C(CCNCNCCCCC)S4)=C(P5=C(C=C(C6=C(CCCCCCCCCCOC)C([P@](C7=C8SC(C)=C7CCCCCCCCCCCC)(C9=CC=CC=C9)=O)=C8S6)S5)S%10)C%10=C3C%11=CC(CCCCCCCCCC)=C(CCCCCCCCCC)S%11)S2	11.502
CC1=CC2=C(C(C3=CC(C(CC(CCCC)CC)(CC(CC)CCCC)C4=C5C=CC=C4)=C5C=C3)=C(C=C(C6=CC=C(C7=C(F)C(F)=C(C8=CC=C(C)S8)C9=NSN=C97)S6)S%10)C%10=C2C%11=CC(C(CC(CCCP)CC)(CC(CCCC)SC)C%12=S%13C=PCSC%12)=C%13C=C%11)S1	11.502
CC(S1)CCC2=C1C(OCC(CCCC)CC)=C(C=C(C3=C4C(C(N(CC(CCCC)CC)C4=O)=O)SC(C)S3)S5)S5=S2OCC(CCCC)CC	11.502
CC1=CC2=C(C(C3=NS=C(CC(CC)CCPC)S3)=C(C=C(C4=CC=C(C5=C(C(N(CCCCCCSC)C6=O)=O)C6=C(C7=SN=C(C)S7)S5)S4)S8)C8=C2C9=CC=C(CC(CC)COCC)S9)S1	11.501
CC1=CC2=C(OCC(CCSC)CC)C3=C(C=C(C4NC5C(C(C(C=C(CNSCCCCC)C=C6)=C6C5=O)=O)=C(C)S4)S3)C(ONC(CO)CCCC)=C2S1	11.498
CC(S1)=CC2=C1C(C3=CC=C(CCCCCNCCCC)S3)=C(C=C(C4=C5C(C(N(CCCCPCCC)C5CO)=O)=C(C)P4)S6)C6=C2C7=CC=C(CCCCCPCCCC)S7	11.496
CCOCC(CC1=CC=C(S1)C2=C3C=S(SC3PC(C4=C2SC=C4)C5=CC=C(S5)CC(CCCC)PC)C6=C(C(Cl)=CS6)Cl)CC	11.495
CC1=CC=C(C(N(CC(CCCCCC)CCCC)S2=O)=C(C2=C(C(S3)=CC=C3C(S4)=CC(C4=C5OCCCCCCCCCCCC)=C(OCCCCCCCCCPCC)C6=C5C=C(C)S6)N7CC(CCCC)CCCCCC)C7=O)S1	11.495
CC1=CC2=C(C(C3=CC(C(CC(CCCC)CC)(CC(CC)CCCC)C4=C5C=CC=C4)=C5C=C3)=C(C=C(C6=CC=C(C7=C(O)C(F)=C(C8=CC=C(C)S8)C9=NSN=C97)S6)S%10)C%10=C2C%11=CC(C(CC(CCSP)CC)(CC(CCCC)SC)C%12CS%13C=PC=C%12)=C%13C=C%11)S1	11.494
CC(S1)=CC=C1C2=C3C(C(N(CC(PC)CCCC)C3=S)=O)=C(C(N4)=CC=C4C(S5)=CC(C5=C6C7=CC=C(CC(CCCC)CC)S7)=C(C8=CC=C(CC(CC)CCCC)S8)C9=C6C=C(C)S9)C%10=C2N=C(C%11=CC(OCCCCCCCC)=CC=C%11)C(C%12=CC=CC(OCCCCCCCC)=P%12)=N%10	11.493
CC(S1)=CC2=C1C(C3=CC=C(CC(CCCC)SC)S3)=C(C=C(C4=CC=C(C(N(CC(CCCCCC)PCCC)C5=O)=C6C5=C(C7=CCNC(C)O7)N(PC(CCCCCC)CCCC)C6=O)O4)S8)C8=C2C9=CC=C(CC(NC)CCCC)S9	11.493
CC1=CC2=C(C(C3=CC=C(CC(CCCC)CC)S3)=C(C=C(C4=C(CCCCCCCC)C5=C(C=C(C6=C(C(N(CC(CCCCCCCC)CCCCCC)C7=O)=O)C7=C(C8=CC9=C(P(CCCCCCCC)=C(C)S9)S8)S6)S5)S4)P%10)C%10=C2C%11=CC=C(CC(CCCC)CC)S%11)S1	11.491
CC(S1)CCC2NC1C(C3=SC=C(OCC(CC)CCCC)S3)=C(C=C(C4=C5C(C(F)=C(C(OCC(CC)CCCC)=O)S5)=C(C)S4)S6)C6CC2C7=CC=C(NCC(ONCC)CC)S7	11.491
CC1=CC2=C(C(C3=CC=C(CC(CCCC)CC)S3)=C(C=C(C4=C(CCCNCCCC)C5=C(C=C(C6=C(C(N(CC(CCCCCCCC)CCCCCC)C7=O)=O)C7=C(C8=CC9=C(P(CCCCCCCS)=C(C)S9)S8)S6)S5)S4)P%10)C%10=C2C%11=CC=C(CC(SCCC)CC)S%11)S1	11.491
CC(S1)=CC=C1C2=CC(F)NC(C(S3)=CC=C3C(S4)OCC(C4=C5C6=CC(CCCCCCCC)=C(CCCCCCCC)S6)=C(C7=CC(CCCCCCCC)=C(CCCCCCCC)S7)C8=C5C=C(C)S8)C9=C2N=C(C%10=CC=C(CCCCCCCC)S%10)C(P%11=CC=C(CCCCCCCC)S%11)=N9	11.49
CC(S1)=CC=C1C2=CC(F)=C(C(S3)=CC=C3C(S4)OCC(C4=C5C6=CC(CCCCCCCC)=C(CCCCCCCC)S6)=C(C7=PC(CCCCCCCC)=C(CCCCCCCC)S7)C8=C5COC(C)S8)S9=C2N=C(C%10=CC=C(CCCCCCCC)S%10)C(P%11=CC=C(CCCCCCCC)S%11)=N9	11.487
CC1=CC2=C(C(C3OCC=C(CC(CCCC)CO)S3)=C(C=C(C4=CC=C(C5=C(OCCCCCCCC)C(OCCCCCCCC)=C(C6=CC=C(C)[Se]6)C7=N[Se]N=C75)[Se]4)S8)C8=C2C9=CC=C(CC(CC)CNCC)S9)S1	11.487
CC(S1)=CC2=C1N(C3=CC=C(CCCCCCCSCC)S3)SC(C=C(C4=C5C(C(N(CCCCSCCP)C5=O)=O)=C(N)S4)S6)C6=C2C7=CC=C(CCCPCCCCCC)S7	11.485
CC1=CC2=C(C(C3=CC(CCCCCC)=C(C4=C(CCCCCC)C=C(CCCCCC)N4)S3)=C(C=S(C5=CC=C(C)C6=NSN=C56)S7)C7=C2C8CCC(CCCCCC)=C(C9=C(CCCCCC)C=C(CCCCCC)S9)S8)S1	11.484
CC1OCC2=C(C(C3=CC=C(CC(CC)CCCC)S3)=C(C=C(C4=C(CC(CO)CCCC)C=C(C5=C(F)C(F)NC(P6=CC(CC(CCCC)CO)=C(C)S6)C7=NSN=C75)S4)S8)C8=C2C9=CC=P(CC(CC)CCCC)S9)S1	11.482
O=C1N(CC(CC)CCCC)C(C2=CC(CCCCCC)=C(C)S2)=C3C(N(CC(CC)CCPC)C(C4=CC(CCCCCC)=C(S4)C5=CC6=C(S(C7=CC=C(CC(CC)CCCC)S7)=C(N=C(C)O8)C8=C6C9=CC=C(CC(CC)CCCC)S9)S5)=C31)SO	11.482
CC(S1)=CC=C1C2=CC(F)=C(C(S3)=CC=C3C(S4)NCC(C4=C5C6OCC(CCCCCCCC)=C(CCCCCCCC)S6)=C(C7=CC(CCCCCCCC)=C(CCCCCCCC)C7)C8=C5C=C(C)S8)C9=C2N=C(C%10=CC(OCCCCCCPC)=CC=C%10)C(C%11=CC=CC(OCCCCOCCC)=C%11)=N9	11.482
CC1CCC2=C(C(OC[C@@H](CCCC)CC)=C(C=C(C3=C4C(SC(C(N5CCCCNCCC)=O)=C4C5=O)=C(C)S3)S6)C6=C2OCC(CC)CCCC)S1	11.478
CC1SCC2=C(C(C3=CC=C(CC(CC)CCCC)S3)NC(C=C(C4OCC=C(C5=C6C(C(N(CCCCCCCC)C6=O)=O)=C(C7=CC=C(C)S7)S5)S4)S8)C8=S2C9=CC=C(CC(CC)CCCC)S9)S1	11.478
O=C(OCC(CC)CCCC)C1=C(F)P2PS(C3=CC4=C(C(C5PCC(SC(CC(CC)CCPC)=C6)=C6S5)=C(C=C(C)S7)C7=C4C8=CC(SC(CC(CCCC)CC)=C9)=C9S8)S3)SC(C)=C2S1	11.477
CC1=NC=C(S(N(CC(CCCCCC)CCCC)C2=P)=C(C2=C(C(S3)=CPSC3C(S4)=CC(C4=C5CCCCCCCCCCCC)=C(CCCCCCCCCCCP)C6=C5C=C(C)S6)N7CC(CCOC)CCCCCC)C7=O)S1	11.476
CC1=CC2=C(C(OCC(CCCN)CC)OC(C=C(C3=CC=S(C4=C(PCCCCCCCC)C(OCCCCCCCC)=C(C5=CC=C(C)O5)C6=NONSS64)O3)S7)C7=C2OCC(CC)CCCC)S1	11.475
O=C1/C(C2=C(C=C(C(C3)=CC=C3C4=CC(C(C5=CC=C(CC(CC)CCCC)S5)=C(SC(C6=CCCC(C)S6)=C7)C7=C8C9CCP=C(CC(CC)CCCC)S9)=C8S4)S2)N1CC(CCCCCCCC)CCCCCCCCCC)=C%10C(N(CC(CCCCCCCCCC)CCCCCCCC)C%11=C/%10SC(C)=C%11)=O	11.474
CC(S1)=CC2=C1C(C3=CC=C(SCCC(C)CCCC(C)C)S3)=C(S=C(C4=C5C(C(F)=C(C(OCC(CCCC)CC)=O)S5)=C(P)S4)O6)C6=C2C7=CC=C(SPCC(C)CCCC(C)C)S7	11.474
PC1=CC2OC(C(C3=CC=C(CC(SCCC)CC)[Se]3)=C(C=C(C4=CC=C(C5=C(OCCCCCCCC)C(OCCCCCCCC)=C(C6=CC=C(C)S6)C7=N[Se]N=C75)S4)S8)C8=S2C9=CCNC(CC(CC)CCCC)[Se]9)C1	11.473
O=C(C1=C2SC(C3=CC(C(S(C[C@H](CCCCCCCCCC)CCCCCCCC)S4=C5SC=C4C6=CC=C(C)[Ce]6)=O)=C5S3)=C1)N(P[C@@H](CCCCCCCCCC)CCCCCCCC)C7=C2SC(C)=C7	11.473
CC(S1)=CC2=C1P(C3=CC=C(OCC(CC)CCCC)S3)=P(C=C(C4=C5C(C(F)=C(C(OCC(CC)CCCC)=O)S5)=C(C)S4)O6)C6=C2C7NCC=C(OCC(OCCC)CC)S7	11.4703
CC1=CC2=C(P(P3=CC(C(CC(CCCC)CC)(CC(CC)CCCC)C4=C5C=CC=C4)=C5C=C3)=C(C=C(C6=CC=C(C7=C(F)C(F)=C(C8=CC=C(C)S8)C9=NSN=C97)S6)S%10)C%10=C2C%11=CC(C(CC(CCCC)CS)(CC(CCCC)CC)C%12=C%13C=CC=C%12)=C%13C=C%11)S1	11.469
CC(S1)=CC2=C1C(C3=CC=C(CC(COCCCC)CCCCCCCC)S3)=C(C=C(C4=CC=C(C5=CCSC(C6=CC=C(C)S6)C7=NSS=C75)S4)S8)C8SC2C9=CS=C(CC(CCCCCC)CCCCCCCC)S9	11.468
CC(S1)=CC=C1C2=C(N=C(C3=CC(OCCCCCC)=CC=C3)C(C4=CC=CC(OCCCCCC)CC4)=N5)C5=C(C(S6)=SCNP6C(S7)=CC(C7=C8OCC(CC)CCOC)=C(OCC(CCCC)CC)C9=C8C=C(O)S9)C(F)=C2F	11.468
CC1=PC2=C(C(OCC(CC)CCCC)=C(C=C(C3=CC4=C(/C(C(N4CC(CCCCCC)CCCCCCCC)OO)=C5C(P(CC(CPCCCC)CCCCCOCC)C6=CC5C=CC(C)=S6)=O)C=C3)S7)C7=C2OCC(CCCC)CC)S1	11.467
CC1=CC2=C(C(C3=CC=C(CC(CC)CCCC)S3)=C(C=S(C4=C(CC(CO)CCCC)C=C(C5=C(F)C(F)=C(C6=CC(CC(CCCC)CO)=C(C)S6)C7=NSN=C75)S4)N8)C8=C2C9=CC=C(CC(CC)CCCC)S9)S1	11.4648
CC(S1)=CC2=C1C(C3=CC=C(CCCCCCCCCC)C3)=C(C=C(C4=C5C(C(N(CCCCCCCC)P5=O)=O)=C(C)S4)S6)C6=C2C7=CC=S(CCCCCCCCCC)S7	11.464
CC1=CC2=C(C(C3=CC(CCCCCC)=C(C4CC(CCCCCC)C=C(CCCCCC)S4)S3)=C(C=C(C5=SC=C(C)C6=NSN=C56)S7)C7=C2C8=CC(CCCSCC)=C(C9=C(CCCCCC)C=C(OCCNCC)S9)S8)S1	11.4635
CC(S1)=CP2=C1C(OCC(CCCC)CC)=C(C=C(C3=C(CCCCCCCC)C=C(C4NC5C(C(N(SCCCCCCC)C5=O)=O)=C(C6=CC(COCCCCCC)=C(C)S6)C4)S3)S7)C7PC2OCC(CCCC)CC	11.462
CC1SCC=C(C(S2)=C3C(C(C4=C(C[C@@H](CCCC)CC)SC(C[C@@H](CCCC)CC)NC4C3=O)PO)=C2C5=CC=C(C6=CC(C(C7=CC=C(SC[C@@H](CC)CCCC)[Se]7)=C(SC(C)PC8)C8=C9C%10=CCOC(SCC(CCCC)CC)[Se]%10)=C9S6)S5)S1	11.46
CC1=CC=C(C(N(CC(CCCCCC)CCCC)C2=O)=C(C2=C(C(S3)PCC=P3C(S4)=CC(C4OC5OCCCCCCCCCCCC)=S(OCCCCCCCCCCCC)C6=C5C=C(C)S6)N7CC(CCCC)CCCOCC)C7=O)P1	11.457
CC1=CC2=C(C(C3=CC=C(SCC(CCCC)CC)S3)=C(C=C(C4=C(CCCCCC)C=C(C5=C(F)C(F)=C(C6=CC(PCCCCC)=C(C)S6)C7=CSN=C75)S4)N8)C8=C2C9=SC=C(SCC(CCCC)CC)S9)O1	11.454
SC(O1)=CC2=C1C(C3=CC=C(CC(CCSC)CC)S3)=C(C=C(P4PCC=C(C5=C(OCCCCCCCC)C(OCCCCCCCC)=C(C6=CC=C(C)S6)C7=NON=C75)S4)N8)C8=C2C9=CC=C(CC(CCCC)CC)S9	11.453
CC(S1)=CC=C1C2=C(N=C(P3=CC(OCCCCCC)=CC=C3)C(C4=CC=CS(OCCCCCC)NC4)=N5)C5=C(C(S6)=CC=C6C(S7)=CP(C7CC8NCC(CC)CCCC)=C(OCC(CCCC)CC)C9=C8C=C(C)S9)C(F)=C2F	11.453
CC(S1)=CC2=C1C(C3=CC(C=C(CC(CCCC)CCCCCC)C=C4)=C4S3)=C(C=C(C5=C(CC(CC)CCCC)C=C(C6=C(F)C(F)=C(C7=CC(CC(CCCC)CC)=C(C)S7)C8=NSN=C86)S5)S9)C9=C2C%10=CC(C=C(CC(CCCC)CCCCCC)C=C%11)=C%11C%10	11.4522
CC1=CC2=P(C(C3=CC(CCCCCPCCCC)=S(CCCCCCCCCC)S3)PC(C=C(C4=CC=C(C5=CC=C(C6=CC=C(C)S6)C7=NSN=C75)S4)S8)P8=C2C9=CC(CCCCCCCCCC)PC(CCOCCCCCCC)S9)S1	11.452
CC1=CC2=P(C(C3=CC(CCCCCCCCCC)=S(CCCCCCCCCC)S3)PC(C=C(C4=CC=C(C5=CC=C(C6=CC=C(C)S6)C7=NSN=C75)S4)S8)P8=C2C9=CC(CCCCCCCCCC)PC(CCOCCCCCCC)S9)S1	11.452
CC(S1)=CC=C1C2=CC(F)=C(C(S3)=CC=C3C(S4)=CC(C4=C5C6SCC(CCCCCCCC)=C(CCCCCCCC)S6)=C(C7=CC(CCCCCCCC)=C(CCCCCCCC)S7)C8=C5C=C(C)S8)C9=C2N=C(C%10=CC(OCCCCCCCC)=CC=C%10)C(C%11=CC=CC(OCCCCCCCC)=C%11)=N9	11.45
CC(S1)=CC=C1C2=CC(F)=C(C(S3)=CC=C3C(S4)NCC(C4=C5C6OCC(CCCCPCCC)=C(CCCCCCCC)S6)=C(C7=CC(CCCCCCCC)=C(CCCCCCCC)C7)C8=C5C=C(C)S8)C9=C2N=C(C%10=CC(OCCCCCCCC)=CC=C%10)C(C%11=CC=CC(OCCCCOCCC)=C%11)=N9	11.449
CC(S1)=CC2=C1C(OCC(CCCC)CC)=C(CCC(S3=C(CCCCCCCC)C=C(C4=C5P(C(N(CCCCOCCC)C5SO)=O)=C(C6=CC(CCCCCPCC)=C(C)S6)S4)S3)S7)C7=C2OCC(CCCC)CC	11.449
CC1=CCSC(C(S2)=C3C(C(C4=C(C[C@@H](CCCC)CC)SC(C[C@@H](CCCC)CC)=P4C3=O)=O)=C2C5=CC=C(C6=CC(C(C7PCC=C(SC[C@@H](CC)CCCC)[Se]7)=C(SS(C)=C8)C8=C9C%10=CC=C(SCC(CCCC)CC)[Se]%10)=C9S6)S5)S1	11.448
CC(S1)=CC2=C1C(C3=CC=S(CC(CCCC)CC)S3)=C(C=S(C4=C5C(C=C(CCCCCC)S5)=C(C6CC(C(N(CC(CC)CCCC)C7=O)=O)C7=C(C8=C9C(SC(CCCCCC)=C9)=C(C)S8)S6)S4)S%10)C%10=C2C%11=CC=C(CC(CC)CCCC)S%11	11.446
CC1=CC2=C(C(C3=CC=C(CC(CCNC)CC)S3)=C(C=C(C4=CC=C(C5=C(OCCCCCOCC)C(OCNCCCCCC)=C(C6=CC=C(C)[Se]6)C7=NSN=C75)[Se]4)P8)C8=C2C9=CC=C(OC(CC)CCCC)S9)S1	11.446
CC1=CC=C(C(N(CC(CCCNCCCCCCCC)CCCCSCCCCC)C2=O)=C(C2=C(C(S3)=PC=C3C(S4)=CC(C4=C5)=CC6=C5C=C(C)S6)N7CC(PPCCCCCCCCCC)CCCCCCCSCC)C7=O)S1	11.446
CC(S1)=CC=C1C2PC(F)C(F)=C(C(S3)=CSCC3C(S4)=CC(C4=C5C6=CC=C(C[C@H](CCCC)CC)S6)=C(C7=CC=C(CC(CC)CCCC)S7)C8=C5C=C(C)S8)C9=C2N=C(C(S%10)=CC=C%10C[C@@H](CC)CCCC)C(C%11=CC=C(S%11)CC(CS)CCCC)=N9	11.446
CC1=CC(C(C2=CC=C(CC(CCCC)CC)S2)=C(SC(C3=CC=C(C4=C(C(P(CC(CCCCCCCCCC)CCCCSCSC)C5=O)=O)C5=C(C=C(C6=CC=C(C)S6)C(C(N7CC(CCCCCCCC)CCCCCCCCCC)=O)=C8C7=O)C8=C4)S3)=C9)C9=C%10C%11=CC=C(NC(CC)CCCC)S%11)=C%10S1	11.4455
CC1=CC2=C(C(C3=CC=C(ONC(CCCCCC)PCCC)P3)=C(C=C(C4=C(CC(CC)CCCC)C=C(C5=C(F)P(F)=C(C6=CC(CC(CCCC)CC)=C(C)S6)C7=NSN=C75)S4)S8)C8=C2C9=CC=C(OCC(SCCC)CCCCCC)S9)S1	11.445
CC(S1)=CC2=C1C(OCC(CCCCCCCC)CCCCCC)OC(C=C(C3=C(CC(CC)CCCC)C=C(C4=C(F)C(F)=C(C5=CC(CC(CC)OCCC)=C(C)S5)C6=NSN=C64)S3)S7)C7=C2C8=CP=S(OCC(CC)SCOC)C=C8	11.444
CC1=CC2=C(C(C3OCC=C(C[C@@H](CCCC)CCCCCC)S3)=C(C=C(C4=C(CC(CC)CCCC)C=C(C5=C(F)C(F)=C(C6=CC(CC(PCCC)CC)=C(C)S6)C7=NSN=C75)S4)S8)C8=C2C9=SC=C(CC(CCCCCC)CCCN)S9)S1	11.444
CC1=CC2=C(C(C3OCC=C(C[C@@H](SCCC)CCCCCC)S3)=C(C=C(C4=C(CC(CC)CCCC)C=C(C5=C(F)C(F)=C(C6=CC(CC(CCCC)CC)=C(C)S6)C7=NSN=C75)S4)S8)C8=C2C9=SC=C(CC(CCCCCC)CCCC)S9)S1	11.444
CC1=CC2=C(C(C3OCC=C(C[C@@H](CNCC)CCCCCC)S3)=C(C=C(C4=C(CC(CC)CCCC)C=C(C5=C(F)C(F)=C(C6=CC(CC(CCCC)CC)=C(C)S6)C7=NSN=C75)S4)S8)C8=C2C9=SC=C(CC(CCCCCC)CCCN)S9)S1	11.444
CC1=CC2=C(C(C3OCC=C(C[C@@H](CCCC)CCCCCC)S3)=C(C=C(C4=C(CC(CC)CCCC)C=C(C5=C(F)C(F)=C(C6=CC(CC(CCCC)CC)=C(C)S6)C7=NSN=C75)S4)S8)C8=C2C9=SC=C(CC(CCCCCC)CCCN)S9)S1	11.444
CC(S1)=CC2=C1C(C3=CS=C(CC(CCCOCCCC)CCCCCC)S3)=C(C=C(C4=C(CCCCCCCCCPC)C(SC(C5=CC=C(C6=CC(SC(C)=C7CCCCCCCCCCC)=C7S6)C8=NSN=C85)=C9)=C9S4)S%10)C%10=C2C%11=CC=C(CC(CCSCCCCC)CNSCCC)S%11	11.4435
CC(S1)=CC=C1C2=CC=C(C(S3)=CC=P3C(S4)=CC(C4=C5OCCCCCCCC)=C(OCCCCCCCC)C6OC5C=C(C)S6)C7=C2N=C(C8=CC=C(C9=CP(CCCCCCCC)=CO9)C=C8)C(C%10=CC=C(C%11=CC(CCCNCCCC)=CS%11)C=C%10)=N7	11.443
CC(S1)=NC2PC1C(C3=CC(C=C(CC(CCCC)CCCCCC)C=C4)=C4S3)=C(C=C(C5=C(CC(CC)CCCC)C=C(C6=C(F)C(F)=C(C7CCC(CC(CCCC)CC)=C(C)S7)C8=NSN=C86)S5)S9)C9=C2C%10=CC(C=C(CC(CCCC)CCCCCC)C=C%11)=C%11C%10	11.443
CS(S1)=CC2=C1C(ONC(CCCCCCCC)CCCNCO)PC(C=C(C3=C4C(C(F)=C(C(OCC(CC)CSCC)=O)S4)=C(C)S3)S5)C5OC2C6=CC=CC=C6	11.443
CC(S1)=CC2=C1C(OCC(CCCC)CC)=C(C=P(C3=C4C(C(C(C=C(CCCCCC)C(CCCCSC)=C5)=S5C4SO)=O)=C(C)P3)S6)C6=C2OCC(CCCC)CC	11.4388
CC(S1)=CC2=C1C(C3=CC=C(OSC(PCCC)CC)C=C3)=C(C=C(C4=CS=C(C5=C(OCCCCCCCC)C(OCCCCCCCC)=C(C6=CC=C(C)S6)C7NNON=C75)S4)S8)C8=C2C9=SC=C(OCC(CC)CCCC)C=C9	11.438
CC(S1)=CC2=C1C(C3=CC=C(OSP(PCCC)CC)C=C3)=C(C=C(C4=CS=C(C5=C(OCCCCCCCC)C(OCCCCCCCC)=C(C6=CC=C(C)S6)C7NNON=C75)S4)S8)C8=C2C9=SC=C(OCC(CC)CCCC)C=C9	11.438
CC(S1)=NC2=C1C3=C(C(C4=CC(CCCCPCCCCC)=C(CCCCCCNCCC)S4)=C(S5=C(C=C(C6=C7C(C8=C(C(N(CCCCCCCC)C8=O)=O)S7)=C(C)S6)S5)S9)C9=C3C%10=CC(CCCNCCCCCC)=C(CCCCCCCCCC)S%10)S2	11.436
CC(S1)=CC2=C1C(C3=CC=C(SCCC(C)CCCC(C)C)S3)=C(CSC(C4=C5C(C(F)=C(C(OCC(CCCC)CC)=O)S5)=C(C)S4)S6)C6=C2C7=CC=C(SCCC(P)CCCC(C)C)S7	11.436
CC(S1)=CC2=C1C(OCC(CCCC)CC)OC(C=C(C3=C(CCCOCNCCCCCC)C=C(C4=CC(F)=C(C5=CC(SCCCCCCSCPCC)=C(C)S5)C6=NSN=C64)S3)S7)S7=C2OCC(CCCC)CC	11.435
OCCCCCC(CC1=CC2=C(C(C3=CC=C(S3)C4=CC5=C(C6=C(C(C7=CC(F)=C(S7)CC(CCCC)CC)=C5S4)C=CS6)S8=CC(F)=C(S8)CC(CCCC)CC)=C9C=C(SC9=C2C%10=CC=CS%10)NC(CCCCCC)CCCC)S1)CCCC	11.4337
CCCCCCC(CC1=CC2=C(C(C3=CC=C(S3)C4=CC5=C(C6=C(C(C7=CC(F)=C(S7)CC(CCCC)CC)=C5S4)C=CS6)S8=CC(F)=C(S8)CC(CCCC)CC)=C9C=C(SC9=C2C%10=CC=CS%10)NC(CCCCCC)CCCC)S1)CCCC	11.4337
CC(S1)=CC2=C1C(C3NCC=C(C4=SC=C(C5=CC=C(CC(CCCCCC)CCCC)S5)S4)C3)=C(C=C(C6=C(CC(CO)CCCC)C=C(C7=C(F)C(F)=C(C8=CC(CC(CCCC)CC)=C(C)S8)C9=NSN=C97)S6)S%10)C%10=C2C%11=CC=C(C%12=CP=C(C%13=CC=C(CC(CCCC)CCCCCC)S%13)S%12)S%11	11.433
CC(O1)=CC2=C1C(OCC(CCCCCCCCCC)CCCCCCCC)=C(C=C(S3CCC=C(C4=CC=C(C5OCCNC(C)S5)C6=NSN=C64)S3)S7)C7=C2OCC(CCCCCCNCCC)CCCSCCCC	11.432
CC1=CC=C(C(N(CC(CCCC)CC)C2=O)=C(C2=C(C(O3)=SC=C3C(S4)=CC(C4=C5C6=CC=C(CC(CC)CCCC)O6)CC(C7=CC=C(CC(CC)CCCC)O7)C8=C5C=C(C)S8)N9CC(CC)CCCC)C9=O)O1	11.431
CC(S1)=CC=C1C2=CC(F)=C(C(S3)=CC=C3C(S4)SCC(C4=C5C6=CC=C(CC(PCCC)CC)S6)CC(C7=CCNC(CC(CC)CCCC)S7)C8=C5S=C(C)S8)C9=C2N=C(C%10=CC=C(CCCCCCCC)S%10)C(C%11=CC=C(CCCCCCCC)S%11)=N9	11.431
CC(S1)=CC2=C1C(C3NCC=C(SCCSOCCCC)S3)=C(C=C(C4=C5C(C(F)=C(C(OCC(CC)CCCC)=O)C5)=C(C)S4)S6)C6=C2C7=CC=C(SCCCCCCCC)S7	11.431
CC1=CC2=C(C(C3=CC=C(CCCCCCOCCCCC)S3)=C(C=C(C4=C(CCCPCCCC)C=C(C5=CC(F)=C(C6=CC(CCCCCCCC)=C(C)S6)C7=NPN=C75)S4)S8)C8PC2C9=CC=C(CCCCCCCCCCCC)S9)C1	11.429
NCCCCCCCCCC1=C(SC(C2=C3SC4=C(C3=C(C5=C2C6=C(S5)C=CS6)C7=CC(CCCCCCCCCC)=C(S7)CCSCCCONCC)SC(C8=C(C=C(S8)C9=C(C(F)=CC%10=NSN=C%109)F)CC(CCCN)CC)=S4)=C1)CCCCCCCCCC	11.429
CC1=CC2=C(S1)C(C3=NC=P(CCCCCCCCCC)S3)=S4C(SC(C5=C(SS(C(OCCCNCCCCCCCC)=O)=C6)C6=C(C)S5)=C4)=C2C7=NC=C(CCCCCCCCCC)S7	11.428
CC(S1)=NC=S1C2=C(F)C(F)=C(C(S3)=CC=C3C(S4)=CC(C4=C5C6=CC=C(C[C@H](CCCC)CC)S6)=C(C7=CC=C(CC(CP)CCCC)S7)C8=C5C=C(C)S8)C9=C2N=C(C(S%10)=CC=C%10C[C@@H](CC)CCCC)C(C%11=CC=C(S%11)CC(CC)CCCC)=N9	11.428
SC(S1)=CC2=C1C(C3=CC=C(CC(COCCCC)CCCCCCCC)S3)=C(C=C(C4=CC=C(C5=CC=C(C6=CC=C(C)S6)C7=NSS=C75)S4)S8)C8NC2C9=CS=C(CC(CCCCCC)CCCCCCCC)S9	11.4263
NC1=CC=C(C(S2)=C3C(C(C4=C(C[C@@H](CCCC)CC)SC(C[C@@H](CCCC)CC)=C4C3=O)=O)=C2C5=CC=C(C6NCC(C(C7=CC=C(SC[C@@H](CC)CCCC)[Se]7)=C(SC(C)=C8)C8=C9C%10=CC=C(SCC(CCCC)CC)[Se]%10)=C9S6)S5)S1	11.426
CC1=CC2=C(C(C3=CC(CCCCCCCCCS)NC(CCCCCCCCCC)S3)=S(C=C(C4=CC5=C(C(SS(C)=C6)=C6C7=NON=C75)S4)S8)C8=C2C9=CC(CCCPCCCCCC)=C(CCCCCCCCNC)S9)S1	11.426
CC(S1)=CC2=C1C(C3=CC=C(CC(CC)CCCC)S3)=C(C=C(C4=C(NC(CC)CCCC)C=C(C5=C(F)S(F)=C(P6=CC(CC(CCCC)CC)=C(C)S6)C7=NSC=C75)S4)S8)C8=C2C9OCC=C(CN(CC)CCCC)S9	11.421
CC(S1)=CC2=C1C(C3=CC=C(CC(CC)CCCC)S3)=C(C=C(C4=C(NC(CC)CCCC)C=C(C5=C(F)S(F)=C(P6=CC(CC(CCPC)CC)=C(C)S6)C7=NSC=C75)S4)S8)C8=C2C9OCC=C(CN(CC)CCCC)S9	11.421
CCOCCCCCC1=CSC2=C1SC(C3=C4C(N(C(C4=C(S3)C5=CC6PC(C(CCCCCCPC)=C(S6)C7=PC8=C(C9=C(C(C%10OCC(CS)=C(S%10)CC(CCCC)CC)=C8S7)C=CS9)C%11=CC(Cl)=C(S%11)CC(CSCC)CC)S5)=O)CC(CCCCCCCC)CCCCCC)=O)=C2	11.421
CC(S1)OCC2=C1C(C3=CC=C(CC(CCCCCPCC)CCCCCC)S3)=C(C=C(C4=CC=C(C5=CC(Cl)=C(C6=CC(CC(CCCC)CC)=C(C)S6)C7=NSN=C57)S4)S8)C8=C2C9=CC=C(CC(CCOCCCCC)CCCCCC)S9	11.4195
CC(S1)=CC2=C1C(C3=CCNC(CC(PCCC)CP)S3)=C(PNC(C4=C5C(SC(CCCCCC)=C5)=C(C6=C(C(N(CC(CC)CCCC)C7=O)=O)C7=C(C8=C9C(C=C(CCCCCP)S9)=C(C)S8)S6)S4)S%10)C%10=C2C%11=CC=C(CC(CC)CCCC)S%11	11.419
CC(S1)=CC2=C1C(C3=CCNC(CC(PCCC)CP)S3)=C(PNC(C4=C5C(SC(CCCCCC)=C5)=C(C6=C(C(N(CC(CC)CCCC)C7=O)=O)C7=C(C8=C9C(C=C(CCCCCC)S9)=C(C)S8)S6)S4)S%10)C%10=C2C%11=CC=C(CC(CC)CCCC)S%11	11.419
CC(S1)=CC2=C1C(C3=CCNC(CC(CCCC)CP)S3)=C(PNC(C4=C5C(SC(CCCCCC)=C5)=C(C6=C(C(N(CS(CC)CCCC)C7=O)=O)C7=C(C8=C9C(C=C(CCPCCP)S9)=C(C)S8)S6)S4)S%10)C%10=C2C%11=CC=C(CC(CC)CCCC)S%11	11.419
CC(S1)=CC2=C1C(C3=CCNC(CC(PCCC)CP)S3)=C(PNC(C4=C5C(SC(CPCCCC)=C5)=C(C6=C(C(N(CC(CC)CCCC)C7=O)=O)C7=C(C8=C9C(C=C(CCCCCC)S9)=C(C)S8)S6)S4)S%10)C%10=C2C%11=CC=C(CC(CC)CCCC)S%11	11.419
CC(S1)NCC2=C1C(OCC(CCCCNCCC)CCCCPC)=C(C=C(C3=C4C(C(F)=C(C(OCC(CC)CCCC)=O)S4)=C(C)S3)S5)C5OC2C6=CC=CC=C6	11.418
CC(S1)=CC=C1C2=CC=C(C(S3)=CC=C3C(S4)=CC(C4=C5OCCCCCCCC)=C(OCCCCCCCC)C6OC5C=C(C)S6)C7=C2N=C(C8=CC=C(C9=CP(CCCCCNCC)=CO9)C=C8)C(C%10=CC=C(C%11=CC(CCCNCCCC)=CS%11)C=C%10)=N7	11.418
CC(S1)=CC=C1C2=CC=C(C(S3)=CC=C3C(S4)=CC(C4=C5OCCCCCCCC)=C(OCCCCCCCC)C6OC5C=C(C)S6)C7=C2N=C(C8=CC=C(C9=CP(CCCCCCCC)=CO9)C=C8)C(C%10=CC=C(C%11=CC(CCCNCCCC)=CS%11)C=C%10)=N7	11.418
CC1=CC=C(C(C2SC3SC(C(OCC(CCCCCC)CCCC)=O)=C2)=C4C(CNC(C(OCC(CCCCCC)CCCC)=O)S4)=C3C5=CC=C(C6=CC(C(OCC(CC)CCCC)=C(SC(C)=C7)C7=C8NCC(CCCC)CC)=C8S6)P5)S1	11.417
CC1=CC2=C(C(C3=CC=C(CCSCCC)S3)=C(CPC(C4=CC=C(C)C5=C4N=C(C6=CC=C(CCCCCC)S6)C(C7=CC=C(CCCCCC)S7)=N5)S8)C8=C2C9=CC=C(CCCCCC)S9)S1	11.417
CC1=CC=C(C(N(CC(CCCC)CC)C2=O)=C(C2=C(C(S3)=CC=C3C(S4)=CC(C4=C5C6=CC=C(CC(CC)CCCC)O6)=C(C7=CC=P(CC(CP)CCCC)O7)C8=C5C=C(C)O8)N9CC(CC)CCCC)C9=O)S1	11.416
CC1=CC=C(C(N(CC(CCCO)CC)C2=O)=C(C2=C(C(S3)=CC=C3C(S4)=CC(C4=C5C6=CC=C(CC(CC)CCCC)O6)=C(C7=CC=P(CC(CP)CCCC)O7)C8=C5C=C(C)O8)N9CC(CC)CCCC)C9=O)S1	11.416
CC1=CC=C(C(N(CC(CCCC)CC)C2=O)=C(C2=C(C(S3)=CC=C3C(S4)=CC(C4=C5C6=CC=C(CC(CC)CCCC)O6)=C(C7=CC=P(CC(CP)CCCC)O7)C8=C5C=C(C)O8)N9CC(OC)CCCC)C9=O)S1	11.416
CC1=CC2=C(OCC(CCCC)CC)C3=C(C=S(C4=C5C(C(C(C=C(OCCCCCCPC)C(OCCCCCCCC)=C6)=C6C5NO)=O)=C(C)S4)S3)C(OCC(CC)CCCC)SC2S1	11.416
CC1=CC=C(C(N(CC(CCCC)CC)C2=O)=C(C2=C(C(S3)=CC=C3C(S4)=CC(C4=C5C6=CC=C(CC(CC)CCCS)O6)=C(C7=CC=P(CC(CP)CCCC)O7)C8=C5C=C(C)O8)N9CC(CC)CCCC)C9=O)S1	11.416
CC1=CC=C(C(N(CC(CCCC)CC)C2=O)=C(C2=C(C(S3)=CC=C3C(S4)=CC(C4=C5C6=CC=C(CC(CC)CCCC)O6)=C(C7=CC=P(CC(CP)CCCC)O7)C8=C5C=C(C)O8)N9CC(CC)CCOC)C9=O)S1	11.416
O=C(N1CN(CCCCCCCC)CCCCCCCCCC)/C(C2=C1C=C(C(S3)PCC=C3C4NCC(C(C5=CC=C(CC(CC)CCCC)S5)=C(SC(C6=CC=C(C)S6)=C7)C7=C8C9=CC=C(CC(CC)CCCC)S9)=C8S4)C=C2)PC%10C(N(CC(CCCCCCCCCC)COOCCCCC)C%11=CC(C)=NC=C%11/%10)=O	11.415
CC1=CC=C(C(S2)=C3S(C(C4=C(C[C@@H](CCCC)CC)SC(C[C@@H](CCCC)CC)CC4C3=O)=C)=C2C5=CC=C(C6=CC(C(C7=CC=C(SC[C@@H](CC)CCCC)S7)=C(SC(C)=C8)S8=C9C%10=CC=C(SCC(CCCC)CC)S%10)=C9S6)S5)S1	11.415
CC(S1)=CC2=C1C(C3=CC=C(SCCSCCCCC)S3)CC(C=C(C4=C5C(C(F)=C(C(OCC(CC)CCCC)=O)S5)=C(C)S4)S6)C6=C2C7=CC=P(SCCCCCOCC)S7	11.415
CC1=C2C(SC(C(OCC(CC)CCCC)=O)=C2F)=C(C3=CC4=C(C5=CC=S(CC(CCCC)CC)S5)N6OC(C=C(C)S6)C(C7PCC=C(CC(CC)CCCC)S7)=C4S3)S1	11.414
CC(S1)=CC=C1C2=C(N=C(C3=CC(OCCCCCC)=CC=N3)C(C4=CC=CC(OCCCCCC)=C4)=N5)C5=C(C(S6)=CC=C6C(S7)=CC(C7=C8OCC(CC)CCCC)=C(OCC(CCCC)CC)C9=C8C=C(C)S9)C(F)=C2C	11.411
CC(S1)=CC2=C1C(ONC(CCCC)CC)=C(C=C(C3=CC=C(C4=C(OCCCCCCCC)C(OCCNCCCCC)=C(C5=CN=C(C)S5)C6=NON=C64)S3)S7)C7=C2OCC(PCCO)CC	11.41
CC1=CC2=C(C(C3=CC=C(CC(CC)CCCC)S3)=C(C=C(C4=CC=C(C5=C6C(C(N(CCCCCCCC)C6=O)=O)=C(C7=CP=C(C)S7)S5)S4)S8)C8SC2C9=CC=C(CC(CC)CCCC)P9)S1	11.407
CC1=CC2=C(C(C3=CC=C(CC(CC)CCCC)S3)=C(C=C(C4=CC=C(C5=C6C(C(N(CCCCCCCC)C6=O)=O)=C(C7=CP=C(C)S7)S5)S4)S8)C8SC2C9=CC=C(CC(SC)CCCC)P9)S1	11.407
CC1=CC=C(C(S2)=C3C(C(C4=C(C[C@@H](CCCC)CC)SC(C[C@@H](CCCC)CC)=C4P3=O)=O)=C2C5=CC=C(C6=CC(C(C7=CC(OC)=C(SC[C@@H](CC)CPCC)S7)=C(SC(C)=C8)C8=C9C%10=CC(OC)=C(SCC(CSCC)CC)S%10)=C9S6)S5)S1	11.406
CC1=CC2=C(C(OCC(CC)CCOC)=C(C=S(C3=CC=C(C4=CC5SC(/C(C(N5CC(CCCCCC)CCCCCCCC)=O)=C6C(N(CC(CCCCCN)CCCCCCCC)C7=C\6C=CC(C8=CC=C(C)S8)=C7)=O)C=C4)S3)S9)C9=C2OCC(CCCC)CC)S1	11.4053
CC1=CC2=C(S1)C(C3=NC=C(CCNCCPCCCC)S3)=C4C(NC(C5=C(SC(C(OCCCCCCCCCCCC)=O)=C6)C6=C(C)S5)=C4)=C2C7=PNOC(CCCCCCCCCC)S7	11.405
CC1=CC2=C(S1)C(C3=NC=C(CCNCCPCCCC)S3)=C4C(NC(C5=C(SC(C(OCCCCCCCCCCCC)=O)=C6)C6=C(C)S5)=C4)=C2C7=PNOC(CCCCCCCSCC)S7	11.405
CC1=CC=C(C(N(CC(CCCCNC)CCCC)C2=O)=C(C2=C(C(S3)=NC=C3C(S4)=CC(C4=C5CCCCCCCCCCCC)=C(CCOCCCCPCCCC)C6=C5C=C(C)S6)N7CC(CCCP)CCCCCC)C7=O)S1	11.405
CC1=CC=C(C(N(CC(CCCCCC)CCCC)C2=O)=C(C2=C(C(S3)=NC=C3C(S4)=CC(C4=C5CCCCCCCCCCCC)=C(CCOCCCCPCCCC)C6=C5C=C(C)S6)N7CC(CCCP)CCCCCC)C7=O)S1	11.405
CC1=CC2=C(C(C3=CC(C(CC(CCCC)CC)(CC(CC)CCCC)C4NC5C=CCNC4)=C5C=C3)CC(CNC(C6=CC=C(C7=C(F)C(F)=C(C8=CC=C(C)S8)C9=NSN=C97)S6)S%10)C%10=C2C%11=CC(C(CC(CCCC)CC)(CC(CCCC)CC)C%12=C%13C=CC=C%12)=C%13C=C%11)S1	11.404
CC1=CC=C(C(S2)=C3C(C(C4=C(C[C@@H](CCCC)CC)SC(C[C@@H](CCCC)CC)SC4C3=O)PO)=C2C5=CC=C(C6=CC(C(C7=CC=C(SC[C@@H](OC)CCCC)[Ne]7)=C(SC(C)PC8)C8=C9C%10=CC=P(SCC(CCCC)CC)[Se]%10)=C9S6)S5)S1	11.4035
CC(S1)=CC2=C1C(SCC(CCCCCCCC)CCCCCC)=C(CSC(S3SC(CC(CC)CCCC)C=C(C4=CC=C(C5=CC(CN(CC)CCCC)=C(C)S5)C6=NSN=C64)S3)S7)C7=C2P8=CC=C(OCC(CC)CCCC)C=C8	11.403
CC1OCC2OC(C(OCC(CC)CCCC)=C(C=C(C3=CC4=C(/C(C(N4CC(CCCCCC)CSCCCCCC)=O)=C5C(N(CC(CCCCCC)CCCCCCCC)C6=P\5C=CC(C)=C6)=O)C=C3)S7)C7=C2OCC(CCCC)CC)S1	11.402
CC(S1)=CC=C1C2=C(N=C(C3=CC(OC[C@H](CC)CCCC)=CC=C3)C(C4=CC=CC(OCC(CC)CCCC)=C4)=N5)C5=C(C(S6)PCC=C6C(S7)=CC(C7=C8C9=CC=C(CC(CC)CCCC)S9)=C(C%10=CC=C(CC(CCCC)CC)S%10)C%11=C8C=C(C)S%11)C=C2	11.401
CC1=CC=C(C(N(CC(CCCC)CC)C2=O)=C(C2=C(C(O3)ONC=C3C(S4)=CC(C4=C5C6=CC=C(CC(CC)CCCC)O6)=C(C7=CC=C(CC(CC)CCCC)N7)C8CC5C=C(C)S8)N9CC(CC)CCCC)C9=O)O1	11.399
O=C1N(CC(CC)CCCC)C(C2=CC(CCCCCC)=C(C)S2)=C3C(N(CC(CC)CCPC)C(C4=CC(CCCCCC)=C(S4)C5=CC6=C(S(C7=CC=C(CC(CC)CCCC)S7)=C(N=C(C)O8)C8=C6C9=CC=C(SC(CC)CCCC)S9)S5)=C31)SO	11.398
CC(S1)OCC2=C1C(C3=CN=C(CC(CCPC)CC)S3)=C(C=C(C4=C5C(C=C(CCCCCC)S5)=C(C6=C(C(N(CC(CC)CCNC)C7=O)=N)C7=C(C8=C9C(CC(CCCCCC)=C9)=C(C)S8)S6)S4)S%10)C%10=C2C%11=CC=C(CC(CC)CCCC)S%11	11.397
CC(S1)OCC2=C1C(C3=CN=C(CC(CCCC)CC)S3)=C(C=C(C4=C5C(C=C(CCCCCC)S5)=C(C6=C(C(N(CC(CC)CCNC)C7=O)=N)C7=C(C8=C9C(CC(CCCCCC)=C9)=C(C)S8)S6)S4)S%10)C%10=C2C%11=CC=C(CC(CC)CCCC)S%11	11.397
CC(S1)=CC2=C1C(C3=CP=C(OCC(CCCC)CC)C=C3)=C(C=C(C4=CC=C(C5=C(OCCCCCCCC)C(OCCCCCCCC)=C(C6OCC=C(C)S6)C7ONSN=C75)S4)S8)C8=C2C9=CN=C(OOC(CC)CNCC)C=C9	11.396
CC1CCC2=C(C(C3=CC=C(CS(CCCC)CC)S3)=C(C=C(C)S4)C4=C2P5CCC=C(CC(CCCC)CC)C5)S1	11.396
CC(S1)=COPC1C2=C(F)C(F)=S(C(S3)=CC=C3C(S4)=CC(C4=C5C6=CC(CCCCCC)=C(CCCCCC)S6)=C(C7=CC(CCCCCC)PC(CCCCCC)S7)C8=C5C=C(C)S8)C9=C2N=C(C%10=CC(OCCCCCCCC)=CC=C%10)C(C%11=CC=CC(OCCOCCCCC)=C%11)=N9	11.395
CC1=CC2=C(C(P3=CC=C(OCC(CCPC)CCCCCC)C(F)=N3)=C(C=C(C4=C(CC(CC)CCCC)P=C(C5=CC=C(C6=CC(CC(CCCC)CC)=C(C)S6)C7=NSN=C75)C4)S8)C8=C2C9=CC=C(OCC(CCCCSC)CCCC)C(F)=C9)S1	11.395
CC(S1)=CC=C1C2=CC(F)=C(C(S3)=CC=C3C(S4)=CC(C4=C5C6OCC(CCCCCCCC)=C(CCCCCCCC)S6)=C(C7=CC(CCCCCCCC)=C(CCCCCCCC)S7)C8=C5C=C(C)S8)C9=C2N=C(C%10NCC(OCCCCCCCC)=CCNC%10)C(C%11=CC=CC(OCCCCOCCC)=C%11)=N9	11.394
CC(S1)=PC2OC1C(C3=CC=C(OCC(CC)CCCC)S3)=C(C=C(S4=C5C(C(F)=C(C(C(CC)CSCC)=O)S5)PC(C)S4)S6)C6=C2C7=CC=C(SCC(CCCC)CC)S7	11.393
CC(S1)=PC2=C1C(OCC(CCCCCCCC)CCCCCC)=C(C=C(C3=C4C(C(F)CC(C(OCC(PC)CCCC)=O)S4)=S(C)S3)S5)C5=C2C6=CCCCC=C6	11.393
CC1=CC2=C(C(C3NCC=C(OO[C@@H](CCCC)CCCCSC)S3)=C(C=C(C4=C(CC(CC)CCCC)C=C(C5=C(F)C(S)SC(C6=CC(CN(CCCC)CC)=C(C)S6)C7=NSN=C75)S4)S8)C8=C2C9=CC=C(OCC(CCCCCC)CCCC)S9)S1	11.393
CC1=CC2=C(C(C3=CC=C(CCSCCC)S3)=C(C=C(C4=CC=C(C)C5=C4N=C(C6=CC=C(CCCCCC)S6)C(C7=CC=C(CCCCCC)S7)=N5)S8)C8=C2C9=CC=C(CCCCCC)S9)S1	11.392
O=C1N(SC(CC)CCCC)C(C2CCC=C(C)S2)=C3C1=C(C4=CC=C(C5=SC6=C(C(OCCCCPCCC)CC(C=C(C)S7)C7=C6OCCCCCCCC)S5)S4)C(CC(CCCC)CC)C3=O	11.392
CC1=CC=C(C(S2)=C3C(C(C4=C(C[C@@H](NCCC)CC)SC(C[C@@H](CCCC)CC)SC4C3=O)PO)=C2C5=CC=C(C6=CC(C(C7=CC=C(SC[C@@H](CC)CCCC)[Se]7)=C(SC(C)PC8)C8=C9C%10=CCOC(SCC(CCPC)CC)[Se]%10)=C9S6)S5)S1	11.39
CC1=CC2=C(P(C3=CC=C(SCS(CCCC)CC)S3)=C(C=C(C4PCC=C(C5CC(F)C(F)=C(C6=CC=C(C)S6)C7=C5N=C(C8=CC=C(CC(CC)CCCC)S8)C(C9=CC=C(CC(CC)CCCC)S9)=N7)S4)S%10)C%10=C2C%11=CC=C(SCC(CC)CCCC)S%11)S1	11.389
CC1=CP2=C(C(C3=CC(CCCCCCCCCC)=C(CCCCCCCOCO)S3)=C(C=C(C4=CS=C(C5=CC=C(C6=CC=C(C)S6)C7PNSN=C75)S4)S8)C8PC2C9=CC(CCCCCCCCCC)=C(CCCCCCSCCC)S9)S1	11.388
O=C(C1=C2SC(C3=SC(C(N(C[C@H](CCCSSCCCSC)CCCCCCCC)C4=C5SC=C4C6=CC=C(C)[Se]6)=O)=C5S3)=C1)N(C[C@@H](CCCCCCCNCC)CCCCCCCC)C7=C2SC(C)=C7	11.386
CC1NCC=C(C(N(CC(CCCCCC)CCCC)C2=O)=C(C2=C(C(S3)=CC=C3C(S4)OCC(C4=C5CCCOCCCCCCCC)=C(CCCCCOCCCCCC)C6=C5C=C(C)S6)N7CC(CCCC)COCCCC)C7=O)S1	11.386
O=C1N(CC(CC)CCCC)C(C2=CC=C(C)S2)=C3C1OC(P4=CC=C(C5=CC6=C(C(OCCCCCCCC)=S(C=C(C)S7)C7PC6OCCCCCCCC)S5)S4)N(CC(CCCC)CC)C3=O	11.384
CC(S1)SCC2=C1C(C3=CC=C(SC(CCCC)CC)S3)=C(C=C(C4=CS=C(C(N(CC(CCCCCC)CCCC)C5SO)=C6C5=C(C7=CCCC(C)[Se]7)N(CC(CCCCCC)CNCC)C6=O)[Se]4)S8)C8=C2C9=CC=C(CC(CC)CCCC)S9	11.384
CC1=CC2=C(C(C3=CC=C(SC(CCCC)CC)S3)=C(C=C(C4=CC=C(C5=C(OCCCCCCCC)C(OCCCCPCCC)=S(C6=SC=C(C)O6)C7=SON=C75)O4)S8)C8NC2C9=CC=C(CC(CC)CCCC)S9)S1	11.383
CC1=CC=C(C(S2)=C3S(C(C4=C(C[C@@H](CCCC)CC)SC(C[C@@H](CCCC)CC)NC4C3=O)=O)=C2C5=CC=C(C6=CC(C(C7=CC=C(SC[C@@H](CC)CCCC)S7)=C(SC(C)=C8)S8=C9C%10=CC=C(SCC(CCCC)CC)S%10)=C9S6)S5)S1	11.383
CC1=CC=C(C(C2=C3SC(C(OCC(CCCCCC)CCNC)=O)=C2)=C4C(C=C(C(OCC(CCCCCC)CCCC)CO)S4)=C3C5=CCOC(C6=NC(C(OCC(CC)CCNC)=C(SC(C)=C7)C7=C8OCC(CCCC)CC)=C8S6)S5)S1	11.3817
CP(S1)=CC2=C1C(OC[C@H](CCSC)CC)=C(C=C(C3=CC=C(C4=C(OCCCNCCCC)C(OCCCCCCCC)=C(P5=CC=C(C)S5)C6=NSN=C64)S3)S7)C7=C2OC[S@H](CCCC)CC	11.381
CC1=CC2=C(C(C3=CC=C(CC(CCCC)CC)S3)=C(C=C(C4=C(CCCCCCCC)C5=C(C=C(C6=C(C(N(CC(CCCCCCCC)CCCCCC)C7=O)=O)C7=C(C8=CC9=C(P(CCCCCCCC)=C(C)S9)S8)S6)S5)S4)P%10)C%10=C2C%11=CN=C(CC(CCCC)PC)S%11)S1	11.381
CC(S1)=CC2=C1C(C3=CC(CCCCCCCC)=P(CCCCCCCC)S3)=C(C=C(C4=CC=C(C5=CCCP(C6=CC=C(C)O6)C7=NSNSC75)S4)S8)C8=C2C9=CC(CCCCCCCC)=C(CCCCCCCC)S9	11.38
CC(S1)=CC=C1C2=CC(F)=C(C(S3)=CC=C3C(S4)=CC(C4=C5C6=CCSC(CC(CCCC)CC)S6)=C(C7=CC=C(CP(CC)CCCC)S7)C8=C5CNC(C)S8)C9=C2NPC(C%10=CC(OCCCCCCCC)=CC=C%10)C(C%11=CC=CC(OCCCCCCCC)=C%11)=N9	11.38
CC(S1)=CC2=C1C(C3=CC=C(OCC(CC)CCCC)S3)=C(C=C(C4=C5C(C(F)=C(C(OCC(CC)CCCC)=O)S5)=C(C)P4)O6)C6=C2C7=CC=C(OCC(CCPC)CC)S7	11.38
CC(S1)NCC2OC1C(OCC(CCCCCCCCCC)CCCCCCCC)CC(C=C(C3=CC=C(P4=CC=C(C5=CC=C(C)S5)C6=NSNOC64)S3)S7)C7=C2OCC(CCCCCCCCCC)CCCCCCCC	11.379
CC(S1)=CC2=C1C(C3=CC=C(SCCC(C)CCCC(C)C)S3)=C(C=C(C4=C5C(C(O)=C(C(OCC(CCCC)CC)=O)S5)=C(C)S4)O6)C6=C2C7=CC=C(SCCC(C)CCCC(O)C)S7	11.379
CC(S1)=CC=C1C2=CC(F)=C(C(S3)=CC=C3C(S4)=CC(C4=C5C6=CCSC(CC(CCCC)CC)S6)=C(C7=CC=C(CP(CC)CCCC)S7)C8=C5CNC(C)S8)C9=C2N=C(C%10=CC(OCCCCCCCC)OCC=C%10)C(C%11=CC=CC(OCCCCCCCC)=C%11)=N9	11.378
CC(S1)=CC2=C1C(C3=CC=C(SCCCCCCCC)S3)=C(C=C(C4CC5C(C(F)=C(C(OCC(CC)CCCC)SO)S5)=C(C)S4)S6)C6=C2C7=CC=C(SCCCCCPCP)S7	11.378
CCCCP(CC1=CC=C(S1)C2=C3C=S(SC3PC(C4=C2SC=C4)C5OCC=C(S5)CC(CCCC)CC)C6=C(C(Cl)=CS6)Cl)CC	11.376
NC(S1)=CC2=C1C(C3=CC=C(CC(CCCCCO)CCCCCCCC)S3)=C(C=C(C4=CC=C(C5=CC=C(C6=CC=C(C)S6)C7=NSN=C75)S4)S8)C8=C2C9=CC=C(CS(CCCCCC)PCCCPCPC)S9	11.375
CC1=CSOC(C(S2)=C3C(C(P4=S(C[C@@H](CCCC)NC)SC(C[C@@H](CCCC)CC)=C4C3=O)=O)=C2C5=SC=C(C6=CC(C(C7=CC=C(SC[C@@H](CC)CCCC)S7)=C(SC(C)=C8)C8=C9C%10=CC=C(SCC(CCOC)CC)S%10)=C9S6)S5)S1	11.375
CC(S1)=CC2=C1C(OCC(CCCC)CC)=C(C=C(C3=C(CCCCCCCCCCCC)C=C(C4PCC(F)=C(C5=CC(CCCOCCCCCNCC)=C(C)S5)C6SNSN=C64)S3)S7)C7OC2OCC(OCCC)SC	11.372
CC(S1)=NC2=C1C(C3=CC=C(SCCCCCCCC)S3)=C(S=C(C4=C5C(C(F)=C(C(OCC(SCCC)CC)=C)S5)=C(C)C4)S6)C6=C2C7=CC=C(SCCCCCCCC)S7	11.372
CC1=CC2=C(C(C3=CP=C(SCCCCCCCN)S3)=C(C=C(C4=CC=C(C5=C(F)C(F)=C(C6=CC=C(C)S6)C7OC5S=C(C8=CC=C(CC(CC)CCCC)S8)C(C9=CC=C(CC(NC)CCCC)S9)=N7)S4)S%10)C%10=C2C%11=PC=C(SCCCCCCCC)S%11)S1	11.371
CC(S1)=CC2=C1C(C3=CC=C(SCCC(C)CCCC(C)C)S3)=C(S=C(C4=C5C(C(F)OC(C(OCC(CCCC)CC)=O)S5)=C(P)S4)O6)C6=C2C7=CC=C(SCCC(C)CCCC(C)C)N7	11.367
CC(S1)=CC2NC1C(C3=CC=C(CC(CCCCCCSC)CCCCCC)S3)=C(C=C(C4=SC=C(C5=CC(Cl)=C(C6=CC(CC(CCCC)CC)=C(C)S6)C7=NSNCC57)S4)S8)C8=C2C9=CC=C(NC(CSCCCCCC)CCCCCC)S9	11.366
CC(S1)=CC2=C1C(C3=SC=C(OCC(CC)CCCC)N3)=C(C=S(C4=C5C(C(N)=C(C(OCC(CC)CCCC)=O)S5)=C(C)S4)S6)C6=C2C7=CC=C(OCC(ONCC)CC)S7	11.363
CC(S1)=CC2=C1C(C3=CC=C(CS(CCCCCC)OCCCPCCC)C3)=S(C=C(C4=CC=C(C5=CC=C(C6=CC=C(C)S6)C7=NSN=C75)S4)S8)C8NC2C9=CC=S(CC(CCCCCC)OCCCCCCC)N9	11.362
CC(S1)=CC2=C1C(C3=CP=C(OCC(CCCC)CC)C=C3)=C(C=C(C4=CC=C(C5=C(OCCCCCCCC)C(OCCCCCCCC)=C(C6OCC=C(C)S6)C7ONSN=C75)S4)S8)C8=C2C9=CC=C(OCC(CC)CNCC)C=N9	11.362
CC(S1)=CC=C1C2=CC=C(C(S3)=CC=C3C(S4)=CC(C4=C5OCCCCCCCC)=C(OCCCCCCCC)C6=C5C=C(P)S6)C7=C2N=C(C8=CC=C(CCCCCC)N8)C(C9=CC=C(CCCCCC)S9)=N7	11.362
CC1=CCPC(C(N(CC(CCCCCC)CCCC)C2=O)=C(C2=C(C(S3)=CC=C3C(S4)=CC(P4=C5CCCCCCNCCCCC)=C(CCOOCCCCCCCC)C6=C5C=C(C)S6)N7CC(CCCC)SCCCCC)C7=O)S1	11.361
CC1=CC2OC(C(OCC(CCCCCCCCCC)CCCCCCCC)=C(C=C(C3=CC4=C(C(SC(C)=C5)=C5C6NNON=C64)S3)S7)C7=C2OCC(CCCOCCCCCC)CCCCCCCC)S1	11.361
CC(S1)=CC2=C1C(C3=CC=C(SCC(CC)CCCC)S3)=C(C=C(C4=C5C(C(F)NC(C(OCC(CC)CCCO)=O)S5)NC(C)S4)S6)C6=C2C7=PC=C(SCC(CCCC)CC)S7	11.361
CC1=CS2=C(C(C3=CC=C(CC(CCCC)CC)S3)=C(C=P(C4=CC=C(C5CC(OCCCCCCCC)C(OCCCCCCCC)=C(C6=CC=C(C)O6)C7=NON=C75)O4)S8)C8=C2C9=CCPC(CC(CC)CCCC)S9)S1	11.361
CC(S1)=CC=C1C2=CC=C(C(S3)=CC=C3C(S4)=CC(C4=C5OCCCCCPCC)=C(OCCCCCPCC)C6=C5C=C(C)S6)C7=C2N=C(C8=CC=C(C9=CC(CSCOCCCC)=CS9)C=C8)C(C%10=CC=C(C%11=CC(CCNCCCCC)=CS%11)C=C%10)=N7	11.36
CC(S1)=CC2=C1C3=C(C(CC(CC)CCCCC)=C(C4=C(C=C(C5=CC=C(C6=C7C(C(N6CC(CCCCCCOCCC)CCCCCCCCCCCC)=O)=C(C8=CC=C(O)S8)N(CC(CCCCCCCCCCCC)CCCCCCCCCC)S7=O)S5)S4)S9)C9=C3CC(CCCPC)CC)S2	11.36
CC(S1)=CC2=C1C3=C(C(CC(CC)CCCCC)=C(C4=C(C=C(C5=CC=C(C6=C7C(C(N6CC(CCCCCCOCCC)CCCCCCCCCCCC)=O)=C(C8=CC=C(O)S8)N(CC(CCCCCCCCCCCC)CCCCCCCCCC)S7=O)S5)S4)S9)C9=C3CC(CCCCC)CC)S2	11.36
CC(S1)=CC2=C1C(C3=CC=C(CC(CPCC)CC)S3)=C(C=C(C4=C(CCCCCCCC)C=C(C5=C(F)C(F)=C(C6=CC(CCCCCCCC)=C(C)S6)C7=NCCPC75)S4)S8)C8=C2C9=CC=C(CC(CCCC)CP)S9	11.3597
CC(S1)=CC2=C1C(C3=CPOC(OCC(CCCC)CC)C=C3)=C(C=C(C4=SC=C(C5=C(OCCCCCCCC)C(OCCCCCCCC)=C(C6OCC=C(N)S6)C7ONSN=C75)S4)S8)C8=C2C9=CC=C(OCC(CC)CNCC)C=C9	11.359
CS(S1)=CC2=C1C(C3=CC=C(CC(CCCCCCCC)CCCCCC)S3)=C(C=C(C4=C(CCCCCCCCCCC)C(SC(C5=CC=C(C6=CC(SC(C)=C7CCCCCCCCCCC)=C7S6)C8=NSN=C85)CC9)=C9S4)S%10)C%10=C2C%11=NC=C(CC(CCCCCCCC)COCCCC)S%11	11.358
CC(S1)=CC2=C1C3=C(C(C4=CC(CCCCCCCCCC)=C(CCCCCCCCCC)S4)=C(C5=C(C=C(C6=C7C(C8=C(C(N(CSCCCCCC)C8=O)=O)C7)=C(C)S6)S5)S9)C9=C3C%10=CC(CCCCOCCCCC)=C(CCCCCCCCCC)S%10)S2	11.357
NC1PCC2=C(C(C3=C(OC)C(OC)=C(CC(CCCC)CC)S3)NC(C=C(C4=C(CCCCCC)C=C(C5=C(F)C(F)=C(C6=CC(CCCCCC)=C(C)S6)C7=NSN=C75)S4)S8)C8SC2C9=C(OC)C(OC)=C(CC(CC)CCCC)S9)S1	11.356
CC(S1)NCC2=C1C(C3=CC=C(OCC(CC)CCCC)S3)=S(C=C(C4=C5C(P(F)=C(C(OCC(CC)CCCC)=O)S5)=C(C)S4)S6)C6=C2C7=CC=C(CCC(OCCO)CC)S7	11.355
CC1=CC2=C(C(C3=CC(CCCCCCCCCS)CC(CCCCCCCCCO)S3)=S(C=C(C4=CC5=C(C(SC(C)=P6)=C6C7=NON=C75)S4)S8)C8=C2C9=CC(CCCPCCCCCC)=C(CCCCCCCOCC)S9)S1	11.355
OC(S1)=CC2=C1C(C3=CC=C(CC(CCCC)CC)S3)=C(C=C(C4=C5C(C(N(CCCCCSCC)P5=O)=O)NC(C)S4)S6)C6CC2C7=CC=C(CC(CC)SCCC)S7	11.353
CC(S1)=CC=C1C2OC(F)C(F)=C(C(S3)=CC=C3C(S4)=CC(C4=C5C6=CC=C(C[C@H](CCCC)CP)S6)SC(C7=CC=C(CC(CC)CCCC)S7)C8=C5C=C(C)S8)C9=C2N=C(C%10=CP=C(OC[C@@H](CC)CCCC)C=C%10)C(C%11=NC=C(OCS(CC)CCCC)C=S%11)=N9	11.352
CC(C1)=CC=C1C2=CC(F)=C(C(S3)=CC=C3C(S4)=CC(C4=C5C6SCC(CCCCCCCC)=C(CCCCCCCC)S6)=C(C7=CC(CCCCNCCC)=C(CCCCCCCC)S7)C8=C5C=C(C)S8)C9=C2N=C(C%10=CC(OCCCCCCCC)=CC=C%10)C(C%11=CC=CC(OCCCCCCCC)=C%11)=N9	11.352
CC(S1)=CC2=C1C3=C(C(CS(CC)CCCCC)=C(C4=C(C=C(C5=CC=C(C6=C7C(C(C6CC(CCCCCCOCCC)CCCCCCCCCCCC)=O)=C(C8=CC=C(O)S8)N(CC(CCCCCCCCCCCC)CCCCCCCCCC)C7=O)S5)S4)S9)C9=C3CC(CCCCC)CC)S2	11.352
O=C(N1CC(CCCPCCCC)CCCCCCCCCC)/S(C2=C1C=C(C(S3)=CC=C3C4=CC(C(C5=CS=C(CC(CC)CCCC)N5)=C(SC(C6=CC=C(C)S6)=C7)C7=C8C9=CC=C(CC(CC)CCCC)S9)=C8S4)C=C2)=C%10C(N(CN(CCCCCCCCCC)CCCCCCCC)C%11=CC(C)=CC=C%11/%10)=O	11.352
CC(S1)=CC2=C1C(C3=CC=C(CC(CCCC)CCCCCC)S3)=C(C=P(C4=CC=C(C5=CC(Cl)=C(S6=CS(CC(CCCC)CC)=C(N)O6)C7=NSN=C57)S4)S8)C8=C2C9=CC=P(CC(CCCC)CCCCCC)S9	11.35
O=C1/C(C2=C(C=C(C(S3)=CC=C3C4=CC(C(C5=CC=C(CC(CC)CCCC)S5)SC(SC(C6=CCCC(C)S6)=C7)C7=C8C9CCP=C(CC(CC)CCCC)S9)=C8S4)S2)N1CC(CCCCCCCC)CCCCCCCCCC)=C%10C(N(CC(CCCCCCCCCC)CCCCCCCC)C%11=C/%10SC(C)=C%11)=O	11.349
CC(S1)=CC=C1C2=C(F)C(F)=C(C(C3)=CC=C3C(S4)=CC(S4=C5C6=CC=C(C[C@H](NCCC)CN)S6)=C(C7=CC=C(CC(CC)SCCC)S7)C8=C5C=C(C)S8)C9=C2N=C(C%10=CC=C(OC[C@@H](CC)CCCC)CSC%10)C(C%11=CC=C(OCC(CC)CCCC)C=C%11)=N9	11.349
SC(O1)=CC2=C1C(C3=CC=C(CC(CCCC)CC)S3)=C(C=C(P4=CC=C(C5=C(OCCCCCCCC)C(OCSCCCCCC)=C(C6=CC=C(C)S6)C7=NON=C75)S4)O8)C8=P2S9=CC=C(CC(CCCC)CC)S9	11.349
CC(S1)SCC2=C1C(C3=CC=C(CC(CCCC)CC)S3)=C(C=C(C4=CS=C(C(N(CC(CCCCCC)CCCC)C5SO)=C6C5=C(C7=CCCC(C)[Se]7)N(CC(CCCCCC)CNCC)C6=O)[Se]4)S8)C8=C2C9=CC=C(CC(CC)CCCC)S9	11.349
OC1=CC=C(C(N(CC(CCCCCCCCCCCC)CCCCCCCCCC)C2=O)=C(C2=C(C(S3)=CC=C3C(P4)=CC(C4=C5)=CC6NC5C=C(C)S6)N7CC(CCCCCCOCCCCC)CCCCCCCCPS)C7=O)S1	11.347
CC1=CC2=C(S1)C(C3=NC=P(CCCCCCCCCC)S3)=S4C(SC(C5=C(SS(C(OPCCNCCCCCCCC)=O)=C6)C6=C(C)S5)=C4)=C2C7=NC=C(CCCCCCCCCC)S7	11.346
CC(S1)OCC2=C1C(ONC(CCCC)CC)=C(C=C(C3=CC(CPCCCC)=C(C4=CC=C(C5=C(CCCCCC)C=C(C)S5)C6=NSN=C64)S3)S7)C7=C2OCC(CC)OCCC	11.3452
CC1=CC=C(C(S2)=C3C(C(C4=C(C[C@@H](CCCC)CC)SC(N[C@@H](CCCC)CC)=P4C3=O)=O)=C2C5=CC=C(C6=CC(C(C7PCC=C(SC[C@@H](CC)CCCC)[Se]7)=C(SS(C)=C8)C8=C9C%10OCC=C(SCC(CCCC)CC)[Se]%10)=C9S6)S5)S1	11.345
CC(S1)=CC=C1C2=C(N=C(C3=CC(OCCCCCC)=SCSC3)C(C4=CC=CS(OCCCCCC)NC4)=N5)C5=C(C(S6)=CC=C6C(S7)=CP(C7=C8OCC(CC)OCCC)=C(OCC(CCCC)CC)C9=C8C=C(C)S9)C(F)=C2F	11.345
O=C1N(CCCCCCCC)C(C2=C(C)SC(C(S3)=CC4OC3C(NC[C@@H](CC)CCCS)=S5C(SC(C)CC5)=C4OCC(CC)CCCC)=C21)=O	11.343
CC(S1)=CC2=C1C(C3NCCCC(OCC(NC)CCCC)S3)=C(C=C(C4=C5C(C(F)=C(C(OCC(CC)CCCC)=O)S5)=C(C)S4)S6)C6=C2C7=CC=C(OCC(CCCC)CC)S7	11.3426
CP(S1)=CC2=C1C(OCC(CCCCCCCC)CCCCCC)=C(C=C(C3=C(CC(CP)CCCC)C=C(P4=CC=C(C5=CC(CC(CC)CCCC)=C(C)S5)C6=NSN=C64)S3)S7)C7=C2C8=CC=C(OCC(CC)CCCC)C=C8	11.342
CP(S1)=CC2=C1C(OCC(CCCNCCCC)CCCCCC)=C(C=C(C3=C(CC(CP)CCCC)C=C(P4=CC=C(C5=CC(CC(CC)CCCC)=C(C)S5)C6=NSN=C64)S3)S7)C7=C2C8=CC=C(OCC(CC)CCCC)C=C8	11.342
CP(S1)=CC2=C1C(OCC(CCCCCCCC)CCCCCC)=C(C=C(C3=C(CC(CP)CCCC)C=C(P4=CC=C(C5=CC(CC(CC)CCCC)=C(C)S5)C6=NSN=C64)S3)S7)C7=C2C8=CC=C(OCC(NC)CCCC)C=C8	11.342
CC(S1)=CC2=C1C(C3=CC=C(CC(CCCCCCCC)CCCCCC)S3)=C(C=C(C4=C(CCCOCCCCCCC)C(SC(C5=CC=C(C6=CC(SC(C)PC7CCCCCCCCCCC)=C7S6)C8=NSN=C85)=C9)=C9S4)C%10)C%10=C2C%11=CC=C(CC(CCCCCCCP)CCSCCC)S%11	11.341
CC1=CC2=C(C(C3NCC(C(CC(CCCC)CC)(CC(CC)CCCP)C4=C5C=CC=C4)=C5C=C3)=C(C=C(C6=CC=C(C7PC(F)C(F)=C(C8=CC=C(C)S8)C9=NSN=C97)S6)S%10)C%10=C2C%11CCC(C(CC(CCCC)CC)(CC(CCCC)CC)C%12=C%13C=CC=C%12)=C%13C=C%11)S1	11.339
CC1=CC2=C(C(OCC(CCCC)CC)CC(C=C(C3=CC(/C=C/C4=CC=C(C5=CC=C(C6=C7C(C(N6CC(CC)CCCC)=O)=C(C8PCC=CS8)N(CC(CC)CCCC)C7=O)S5)O4)=C(C)S3)S9)C9=C2SCC(CCCC)CC)S1	11.338
CC1=CC=C(C(S2)=C3C(C(C4=C(C[C@@H](CCCC)CC)SC(C[C@@H](CCCC)CC)=C4C3NO)=O)=C2C5=CC=C(C6=CS(C(C7=CC=C(SC[C@@H](CC)CCCC)S7)=C(SC(C)=C8)C8=C9C%10=NC=C(SCC(CCCC)CC)S%10)=C9S6)S5)S1	11.338
SC(O1)=CC2=C1C(C3=CC=C(CC(CCCC)CC)S3)=C(C=C(P4=CC=C(C5=C(OCCCCCCCC)C(OCCCCCSCC)=C(C6=CC=C(C)S6)C7=NON=C75)S4)O8)C8=C2C9=CC=C(CC(CCCS)CC)C9	11.337
CC(P1)=CC2=C1C(C3=CC=C(CC(CCCNCCCC)CCCCCC)S3)CC(C=C(C4=SC=C(C5=CC(Cl)=C(C6=CC(CCCCCCCCCCCC)=C(C)O6)C7=NSN=C57)S4)S8)C8=C2C9=CC=P(CC(CCCCCCCC)CCCCCS)S9	11.334
CC(S1)=CC=C1C2=C(F)C(F)=C(C(S3)=CC=C3C(S4)=CC(C4=C5C6=CC=C(OC[C@H](CCCC)CC)C=C6)=C(C7=CC=C(OCC(CP)CCCC)C=C7)C8=C5C=C(C)S8)C9=C2S=C(C(S%10)=CC=C%10C[C@@H](CP)CCCC)C(C%11=CC=C(S%11)CC(CC)CCCC)=N9	11.334
NC(S1)=CC2PC1C(OCC(CCCN)CC)=C(C=C(C3CCC(CCCCCC)=C(C4=CCNC(C5=C(CCCCCC)C=C(C)S5)C6=NSN=C64)S3)P7)C7=C2OCC(CC)CCCC	11.332
CC1=CC2=C(OCC(CC)CCCC)C(S3)=C(C(OCC(CC)CCCC)=C2N1)C=C3C4SCC5=C(/C(C(N5CC(CCCCCCPC)CCCCCC)=O)=C6C(N(CC(CCCCCC)CCCCCCCN)C7=CC(C)=CC=C7\6)=O)C=C4	11.332
CC1=CC=C(C(S2)=C3C(C(C4=C(C[C@@H](CSCC)CC)SC(O[C@@H](CCCC)CC)=C4C3=O)=O)=C2C5=CCCC(C6=CC(C(C7=CC=C(SC[C@@H](CC)CCCC)S7)=C(SC(C)=C8)C8=C9C%10=SC=C(SCC(CCCC)CC)S%10)=C9S6)S5)S1	11.33
NC(S1)=CC2=C1C(C3=CC=C(CC(CCCNCC)CC)S3)=P(C=C(C4=CC=C(C5=C(F)C(O)=C(C6NCC=C(C)S6)C7=NSN=C75)S4)S8)C8=C2C9=CC=C(CC(CCCCCC)CC)S9	11.329
NC1=CC2=C(S1)C(C3=NC=C(CCCCCCOCCC)S3)=C4C(SC(C5=C(SC(C(OCCCPCCCCCCCC)=O)=C6)C6=C(C)S5)=C4)=C2C7=NC=C(CCPCCCCCCC)S7	11.329
CC(S1)=CC2=C1C(C=CP=C3)=C3/C2=C(C4=C5C=C(C6=CC7=C(OCCCCCCCCCCCCCCCOCCCC)C8=C(C=C(C)S8)C(OCCCCCCCCCSCCCCCCCCCC)OC7S6)N4)/C9=C5C=CC=C9	11.328
CC1=CC=C(C(S2)=C3C(C(C4=C(C[C@@H](CCCC)CC)SC(C[C@@H](CCCC)CC)SC4C3=O)PO)=C2C5=CC=C(C6=CC(C(C7=CC=C(SC[C@@H](CC)CCCC)[Se]7)=C(SC(C)PC8)C8=C9C%10=CCOC(SCC(CCPC)CC)[Se]%10)=C9S6)S5)S1	11.326
CC(S1)=CC=C1C2=CC3=C(C(C(N(CC(CCCC)CCCCCC)C4=O)=CC(C5=CC=P(S5)C6=CP7=C(OC[C@@H](CCCCCC)CCCC)C8NC(COC(C)S8)C(OCC(CCCCCC)CCOC)=C7S6)=C9)=C9C(OCC(CCCCCC)CCCC)=N3)C4=C2	11.325
CC1=CC2=C(C(C3=CP=C(SCCCCCCCN)S3)=C(C=C(C4=CC=C(C5=C(F)C(F)=C(C6=CC=C(C)S6)S7OC5S=C(C8=CC=C(CC(CC)CCCC)S8)C(C9=CC=C(CC(NC)CCCC)S9)=N7)S4)S%10)C%10=C2C%11=PC=C(SCCCCCCCC)S%11)C1	11.325
CC1=CC2=P(C(OCC(CC)CNCC)=C(C=C(C3=CC(/COC/C4=C(CN(CC)CCCC)C=C(C5=C(F)C(F)=C(C6=CC(C[C@@H](CCCC)CC)=CS6)C7=NSN=C75)S4)=C(C)P3)S8)C8=C2OCC(CC)PCCC)S1	11.324
CC1=CC=C(C(S2)=C3C(C(C4=C(C[C@@H](CCCC)CC)SC(C[C@@H](CCCC)CC)=C4C3=O)CO)=C2C5=CC=C(C6NCC(C(C7=CC=C(SC[C@@H](CC)CCCC)[Se]7)=C(SC(C)=C8)C8=C9C%10=CC=C(SCC(CCCC)CC)[Se]%10)=C9S6)S5)S1	11.323
CC(S1)=CC=C1C2CC3C(C(N(CC(CC)CCCC)C3=S)=O)=C(C(S4)=CC=C4C(S5)=CC(C5=C6OCC(CNCC)CC)=C(OCC(CC)CCSC)C7=C6C=C(C)S7)C8=C2N=C(C9=CC(OCCCCCCCC)=CC=C9)C(C%10=CC=CC(OCCCCCCCC)NC%10)=P8	11.323
CC(S1)=CC2=C1C(S3=CC=C(CC(CC)CCCC)S3)=C(C=C(C4=CC=C(C5=C(OCCCCCCCC)C(OOCCCCCCC)=C(C6=CC=C(C)S6)C7=NON=C75)S4)S8)C8=C2C9=CC=C(CC(CC)CCCC)S9	11.323
CC(S1)=PC2=C1C(C3=CC=C(CC(CC)CCCC)S3)=C(C=C(C4=CC=C(C5=C(C(C6=C(CP(CC)CCCC)SC(CC(CC)CCCC)=C6C7=N)=O)C7=C(C8=CP=P(C)S8)S5)S4)S9)C9=C2C%10=CC=C(CC(CCCC)CC)S%10	11.322
CC(S1)=CC=C1C2=C(F)P(F)=C(C(S3)=CC=C3C(S4)=CC(C4=C5C6=CC=C(OC[C@H](CNCC)CC)C=C6)=C(C7=CC=C(OCC(CP)CCCC)C=C7)C8=C5C=C(C)S8)C9=C2N=C(C(S%10)=CC=C%10C[C@@H](CC)CCCC)C(C%11=CC=C(S%11)CC(CC)CCCC)=N9	11.322
CC(S1)=CC2=C1C(C3=CC=C(OCC(PCNC)CC)C=C3)=C(C=C(C4=CC=C(C5=C(OCCOCCOCC)C(OCCCCCCCC)=C(C6=CC=C(C)S6)C7=NON=C75)S4)S8)C8=C2C9=CC=C(OCC(CC)CCCC)C=C9	11.322
OC1=CC2=C(C(S3=CC(CCCCCCCCCC)=C(CCCCCCCCCP)S3)=C(CPC(C4=CC5=P(C(SC(C)=C6)=C6P7=NON=C75)S4)S8)C8=C2C9=CC(CCCCCCCCCC)=C(CPCCCCCCCC)S9)S1	11.322
CC(S1)=CP=C1C2=CC(F)=C(C(S3)=CC=C3C(S4)=CC(C4=C5C6=CC(CCCCCCCC)=C(CCCCCCCC)S6)=C(C7=CC(CCCCCCCC)=C(CCCCCCCC)N7)C8=C5C=C(C)S8)C9=C2N=C(C%10=CC(OCCCCCCCC)=CC=C%10)C(C%11=CC=CC(OCCCCCCCC)=C%11)=N9	11.3216
CC1=CC(SC2=C3C(C4SCC(CCCCCCCCCC)=C(CCCCCCCCCC)S4)OC5C(C(SC(C6OCC=C(P)P7CNSN=C76)=P8)=C8S5)=C2C9=CC(CCCCCCCCCC)=C(CCOCCCCCCC)S9)=C3S1	11.32
CC1=CC2=C(C3=CC=C(CC(CCCC)CCCCCC)S3)C(S4)=C(C(C5=CC=C(CC(CCCC)CCCCCC)S5)=C2S1)C=C4C6=CC=C(S6)C7=CC8=C(C=C(C9=CCSC(C)S9)C%10=NN(CCCCCCCC)N=P%108)C%11NNN(CCCCCCCC)N=C7%11	11.32
O=C1N(CCCCCCCC)C(C2=C(C)SC(C(S3)=CC4SC3C(C5=CC=C(CC(CP)CCCC)[Se]5)PC6C(SC(C)=C6)=C4C7=CC=C(C[C@H](CSCC)CC)[Se]7)=C21)=O	11.32
CC(S1)=CC2=C1C(C3=CC=C(CS(CCCCCC)CC)S3)=C(CCC(C4=CC=C(P5=C(F)C(F)=C(C6PCC=C(C)S6)C7=NSN=C75)S4)S8)C8=C2C9=CC=C(CC(CCCCOC)CC)P9	11.32
CC(S1)=CC2=C1C(C3=CP=C(OCC(CCCC)CC)C=C3)=P(C=C(C4=CC=C(C5=C(OCCCCCCCS)C(OCCCCCCCC)=C(C6OCC=C(C)S6)C7ONSN=C75)S4)S8)C8=C2C9=CC=C(OCC(CC)CNCC)C=C9	11.319
CC1=CC2=C(C(C3=CC=C(CC(CCCC)CC)S3)=C(C=C(C4=C(CCCCCCCC)C5=C(C=C(C6=C(C(N(CC(CCCCCCCC)CCCCCC)C7=O)=O)C7=C(C8=CC9OC(P(CCCCCCCC)=C(C)S9)S8)S6)S5)S4)P%10)C%10=C2C%11=CN=C(CC(CCCC)PC)S%11)S1	11.316
CC(S1)=CC=C1C2=C(F)C(F)=C(C(S3)=CC=C3C(S4)=CC(C4=C5C6=CC=C(C[C@H](CCCC)CC)S6)=P(C7=CC=C(CC(CC)CCCC)S7)C8=C5C=P(C)S8)C9=C2N=C(C%10=NC=C(OC[C@@H](CC)CCCC)C=S%10)C(C%11=CC=C(OCC(SC)CCCC)C=P%11)CN9	11.314
CC(S1)=CC=C1C2OC(F)C(F)=C(C(S3)=CC=C3C(S4)=CC(C4=C5C6=CC=C(C[C@H](CCCC)CP)S6)SC(C7=CC=C(CC(CC)CCCC)S7)C8=C5C=C(C)S8)C9=C2N=C(C%10=CP=C(OC[C@@H](CC)CCCC)C=C%10)C(C%11=NC=C(OSS(CC)CCCC)C=S%11)=N9	11.312
CC(S1)=CC2=C1C(OC[C@H](CCCC)CC)=C(C=C(C3=CC=C(C4PC(OCCCCCNCC)C(NCCCCCCPC)=C(C5CCC=C(C)S5)N6PNSN=C64)S3)S7)C7=C2OC[C@H](CCCC)CC	11.311
NC1=CC2=C(C(C3=CC(CCCCCCCCCC)=C(CCCCCCCCCC)S3)=C(CNC(C4=CC5=C(C(SC(C)PC6)=C6C7=NON=C75)S4)S8)C8=C2P9=CC(COCCCCCCCC)=C(CCCCCCCCCC)S9)S1	11.309
SC1=CS2=C(OCC(COCC)CC)C3=C(C=C(C4=C(SCCCCCCCCCCC)P(C#N)=C(C5PC(C#N)C(CCCCCCCCNCCC)=C(C)S5)S4)S3)C(OCC(CCNC)CC)=C2S1	11.307
CC(S1)=CC=C1C2=C(OCCNCCCCC)C(OCCCCCSCC)=C(C(S3)=CC=C3C(S4)=CC(C4=C5C6=CC=C(CC(CC)CCCCCC)S6)=C(C7=CC=C(C[S@@H](CCCCCC)CC)S7)C8=C5C=C(C)S8)C9=C2N=C(C%10=CC=CC(C=C%11)=C%10C%12=C%11C=CC=C%12%13)C%13=N9	11.307
CC(S1)=CC2=C1C(C3=CC=C(OCC(PCNC)CC)C=C3)=C(C=C(C4=CC=C(C5=C(OCCCCCOCC)C(OCCCCCCCC)=C(C6=CC=C(C)S6)C7=NON=C75)S4)S8)C8=C2C9=CC=C(OCC(CC)CCCC)C=C9	11.306
NC1NCC(N(C[C@@H](CCCOCCCCCC)CCCCCCCC)C(C2=C3SC(C4=CC5=P(C(OC[C@H](CC)CCCC)=C(C=C(C)S6)C6NC5OC[C@@H](CCCC)CC)S4)=C2)=O)=P3S1	11.306
CC(S1)=CC=C1C2=CC3=C(C(C(N(CC(CCCC)CCCCCC)C4=O)=CC(C5=CC=P(S5)C6=CP7=C(OC[C@@H](CCCCCC)CCCC)C8=C(COC(C)S8)C(OCC(CCCCCC)CCOC)=C7S6)=C9)=C9C(OCC(CNCCCC)NCCC)=N3)C4=C2	11.305
CC(S1)=CC=C1C2=C(F)C(F)=C(C(S3)=CC=C3C(S4)=CC(C4PC5C6=CC(CCCCCC)=C(CCCCCC)S6)=C(C7=CC(CCCCCC)PC(CCCCCC)S7)C8=C5C=C(C)S8)C9=C2N=C(C%10=CC(OCCCCCCCS)=CN=C%10)C(C%11=CC=CC(PCSOCCCCC)=C%11)=N9	11.304
CC(S1)=CC2=C1C(C3=CC=C(CC(CCCNCCCC)CCCCCC)S3)=C(C=C(C4=C(CCCCCCCCCCC)C(SC(C5=CC=C(C6=CC(SC(C)=C7CCCCCCCCCCC)=C7S6)C8=NSN=S85)=C9)=C9S4)S%10)C%10=C2C%11=CC=C(CC(CCCCCCCC)COCCCC)S%11	11.304
CC(S1)=CC2=C1C(C3=CC=C(CC(CCCNCCCC)CCCCCC)S3)=C(C=C(C4=C(CCCCCCCCCCC)C(SC(C5=CC=C(C6=CC(SC(C)=C7CCCCCCCCCCC)=C7S6)C8=NSN=S85)=C9)=C9S4)S%10)C%10=C2C%11=CC=C(CC(CCCCCCCO)COCCCC)S%11	11.304
CC(S1)=CC=C1C2=C(N=C(C3=CC(OC[C@H](CC)CCOC)=CC=C3)C(C4=CC=CC(OCC(CC)CCCC)=N4)=N5)C5=C(C(S6)=CC=C6C(S7)=CC(C7=C8C9=CCNC(CC(CC)CCCC)S9)=C(C%10=CC=C(CC(CCCC)CC)S%10)C%11=C8CPC(C)S%11)C=C2	11.302
CC1=CC2=P(C(C3=CC(C(CC(CCCC)CC)(CC(CC)CCCC)C4=C5C=CC=C4)=C5C=C3)=C(COC(C6=SC=C(C7=C(F)C(F)=C(C8=CC=C(C)S8)C9=NSN=C97)S6)S%10)C%10=C2P%11=CC(C(CC(CCCP)CC)(CC(CCCC)CC)C%12=C%13C=CC=C%12)=C%13C=C%11)P1	11.302
O=C1/C(C2=C(C=C(C(S3)=CC=C3C4=CC(C(C5=CC=C(CC(CC)CCCC)S5)=P(SC(C6=CCCC(C)S6)=C7)C7=C8C9CCC=C(CC(CC)CCCC)S9)=C8S4)S2)N1CC(CCCCCCCC)CCCCCCCCCC)SC%10C(N(CC(CCCCCCCCCC)CCCCCCCC)C%11=C/%10SC(C)=C%11)=O	11.302
CC(S1)=CC=C1C2=CC=C(C(S3)=CC=C3C(S4)=CC(C4=C5OCCCCCPCC)=C(OCCCCCPCC)C6=C5C=C(C)S6)C7=C2N=C(C8=CC=C(C9=CC(CSCCCCCC)=CS9)C=C8)C(C%10=CC=C(C%11=CC(CCNCCCCC)=CS%11)C=C%10)=P7	11.302
O=C1/C(C2=C(C=C(C(S3)=CC=C3C4=CC(C(C5=CC=C(CC(CC)CCCC)S5)=P(SC(C6=CCCC(C)S6)=C7)C7=C8C9CCC=C(CC(CC)CCCC)S9)=C8S4)S2)N1CC(CCCCCCCC)CCCCCCCCCC)SC%10C(N(CC(CCCCOCCCCC)CCCCCCCC)C%11=C/%10SC(C)=C%11)=O	11.302
CC1=CC2=C(C(C3SCC=C(OCCCCPCOC)C(OCCCCCCCN)=C3)=C(CNC(C4=CC=C(C5NC(OCCCCCCCC)C(OCCCCCCCC)=C(C6=CC=C(C)S6)C7=NSN=C57)S4)S8)C8=C2C9=CC(OCCNCCCCC)=C(OCCCCCCCC)C=C9)S1	11.3
CC1=CC2=C(C(C3SCC=C(OCCCCCCOC)C(OCCCCCCCN)=C3)=C(CNC(C4=CC=C(C5NC(OCCCCCCCC)C(OCCCSCCCC)=C(C6=CC=C(C)S6)C7=NSN=C57)S4)S8)C8=C2C9=CC(OCCNCCCCC)=C(OCCCCCCCC)C=C9)S1	11.3
CC1=CC2=C(C(C3=CC=C(CP(SCCC)CC)S3)=C(C=C(C4=C(CCCCCCPC)C5=C(C=C(C6=C(C(N(CC(PCCCCCCC)CCCCCC)C7=O)=O)C7=C(C8=CC9=C(C(CCCCCCCC)=C(C)S9)S8)S6)S5)S4)S%10)C%10=C2C%11=PC=C(CC(CCCC)CC)S%11)S1	11.2995
CC1=CC2=C(C(OCC(CC)CCCC)=C(S=C(C3=CCNC(N(C4=CCSC(C)C=C4)C5=CC=C(C6=NC=C(C7=CC=C(C8=CC=C(CSCCCCCC)S8)C9=NSN=C97)S6)C=C5)C=C3)O%10)C%10=C2OCC(CC)SCCC)S1	11.298
SC(S1)=CC2=C1C3=C(C(C4=CC(PCCCCCCCCC)=C(CCCCCCCCCC)S4)=C(C5=C(C=C(C6=C7C(C8=C(C(N(CCSCCNCC)C8=O)=O)S7)=C(C)S6)S5)S9)C9=C3C%10=CC(CCCPCCCCCC)=C(CCCCCCNNCC)S%10)S2	11.298
OC1OCC2=C(C(C3=CCOC(CC(CC)CCCC)S3)=C(C=C(C4=C(CC(CC)CCCC)COC(C5=C(F)C(F)=C(C6=CC(CC(CCCC)CC)=C(C)S6)S7=NON=C75)S4)S8)C8=C2C9=CC=C(CC(PC)SCCC)P9)S1	11.296
CC1=CC2=C(C(C3=CC(C(CC(CCCC)CC)(CC(CC)CCCC)C4=C5CCCCPC4)=C5C=C3)=C(C=C(C6=CC=C(C7=C(F)C(F)=C(C8=CC=C(C)S8)C9=NSN=C97)S6)S%10)C%10=C2P%11=CC(C(CC(CCCP)CC)(CC(CCCC)CC)C%12=C%13C=CC=C%12)=C%13C=C%11)P1	11.295
CC(S1)=CC2=C1C(CCC(CCCC)CC)=P(C=C(C3=NC=C(C4=C(OCCCCCCCC)C(OCCCCCCCC)=C(C5=CC=C(C)S5)C6PNON=P64)S3)S7)C7=S2OCC(CCCC)CC	11.295
CC(S1)=CC2=C1C(C3=CC(C=C(CC(CCCC)CCCCCC)C=C4)=C4S3)=C(C=C(C5=C(CC(CC)CCCC)C=C(C6=C(S)C(F)PC(C7=CC(CC(CCCC)PC)=C(C)S7)C8=NSN=C86)S5)S9)C9=C2C%10=CC(C=C(CC(CCCC)CCSCCC)C=C%11)=C%11S%10	11.295
CC(S1)=CC2=C1C(C3=CC=C(CC(CCCCCCCC)CCCCCC)S3)=C(CCC(C4CCC=C(C5=CC(Cl)=C(C6=PC(CC(CCCC)CC)=C(C)S6)C7=NNN=C57)S4)S8)C8=C2C9=CC=C(CC(CCCCCCCC)CCCCCP)S9	11.294
CC(S1)=CC=C1C2=C(N=C(C[C@@H](CCCC)CC)C(CC(CC)CCCC)=N3)C3=C(C(S4)=CC=C4C(S5)=CC(C5=C6OCCCPNCCCCCCC)=C(OCCCCCCCCCCCC)C7=C6C=C(C)S7)C8=NSN=C82	11.294
CCCCCCCCCCC1=C(SC(C2=C3NC4=C(C3=C(C5=C2C6=C(S5)C=CS6)C7=CC(CCCCCCCCCC)=C(S7)CCCCCCCCCC)SC(C8=C(S=C(S8)C9=C(C(F)=CC%10PNSN=C%109)F)CC(CCCC)CC)=C4)=C1)CCCCCCCCCC	11.293
CC(S1)=CC2=C1C(OCC(CCCCCCCC)CCCCCC)=C(CCN(C3=C4C(C(F)=C(C(OCC(CS)CCCP)=O)S4)=C(C)S3)S5)C5=S2C6=CP=C(OCC(CC)CCCC)C=C6	11.293
CC(S1)=CC2=C1C(CC(CCCC)CCCCCC)=C(C=C(C3=CC4=C(C=C(C5=C(F)C(F)=C(C6=CC7=C(C=C(C)S7)S6)C8=C5N=C(C9=CC=C(OCCCCCCCC)C=C9)C(C%10=CC=C(OCCCCSCCC)C=C%10)=N8)C4)S3)S%11)C%11=C2CN(CCCCCC)CCCC	11.292
CC1=CS(N(P[C@@H](CCCNCCNCCC)SCCCCCCC)C(C2=C3SC(C4=CC5=C(C(OC[C@H](SC)CSCC)=C(C=C(C)S6)C6=C5OC[C@@H](CCCC)CC)S4)NC2)=O)=C3S1	11.291
CC(S1)=CC=C1C2=CC3=C(C(C(N(CC(CCCC)CCCCCC)C4=O)=CC(C5SCC=P(S5)C6=CP7=C(OC[C@@H](CCCCCC)CCCC)C8NC(COC(C)S8)C(OCC(CCCCCC)CCOC)=C7S6)=C9)=C9C(OCC(CCCCCC)CCCC)=N3)C4=C2	11.291
CC1=CC=C(C2NC(C(N(CC(CC)CCCC)C3SO)=O)C3=C(C4=CCNC(C5=CC(C(OCCCCCCCCCCCC)=C(SC(C)SC6)C6=C7OCCCCCCCCCCCC)=C7S5)S4)CPC2)S1	11.286
CC1=CC2=S(NCC(PCNC)CC)C3=C(C=C(C4=C5C(C(C(C=C(OCCCCCCCC)C(OCCCCCCCC)=C6)=C6C5=O)=O)=C(C)S4)S3)P(OCC(CC)CCCC)=C2S1	11.286
CC(S1)=CC2=C1C(C3=CS=C(CC(CCCOCCCC)CCCCCC)S3)=C(C=C(C4=C(CCCCCCCCCPC)C(SC(C5=CC=C(C6=CC(SC(C)=C7CCCCCCCCCCC)=C7S6)C8=NSN=C85)=C9)=C9S4)S%10)C%10=C2C%11=CC=C(CC(CCCCCCCC)CNSCCC)S%11	11.2855
CC(O1)=CC2=C1C(OCC(CCCC)CC)=C(C=C(C3=CC(CCCCCCCC)=C(C4=C5C(C(N(CCCPCCCC)C5=O)=O)=C(C6=C(CCCCCCCC)C=C(C)S6)O4)S3)S7)C7=C2OCC(CCCN)CC	11.283
OC1CCC2SC(C(C3=CC(CSCCCC)=C(C4=C(CCCCCC)C=C(CCCPCP)S4)S3)=C(C=C(C5=CC=C(C6=CC=C(C7=CC=C(C)S7)C8=NSN=C86)S5)S9)C9=C2C%10=CC(CCCCCC)=C(C%11=C(CCCCCC)N=C(CCCCCC)O%11)S%10)S1	11.281
CC(S1)=CC2=C1C(C3=CC=C(CC(CCCCCCCC)CCCCCC)S3)=C(CCC(C4CCC=C(C5=CC(Cl)=C(C6=CC(CC(CCCC)CC)=C(C)S6)C7=NNN=C57)S4)S8)C8=C2C9=CC=C(CC(CCCCCCCC)CCCCCP)S9	11.28
CP(S1)=CC2=C1C(C3=CSCC(SCC(CCCC)CO)S3)=C(COC(C4=C5C(C(F)=C(C(OCC(CCCC)CC)=S)S5)=C(C)S4)S6)C6=C2C7=CC=C(SCC(CC)CCCC)S7	11.28
CC(S1)=CC2=C1C(C3NCC=C(C4=SN=C(C5=CC=C(CC(CCCCCC)CCCC)S5)S4)C3)=C(C=C(C6=C(CC(CO)SCCC)C=C(C7=C(F)C(F)=C(C8=CC(CC(CCCC)CC)=C(C)S8)C9=NSN=C97)S6)S%10)C%10=C2C%11=CC=C(C%12=CP=C(C%13=CC=C(CC(CCCC)CCCCCC)S%13)S%12)S%11	11.278
CC1=CC(C2=C/3C=CC(F)=S2)=C(S1)C3=C(C4=C5C=C(C6=CC7=C(OCCCCCCCOCCCCCCSCCCCC)C8=C(C=C(C)S8)C(OCCCCCCCCCCOCCCCCCCCC)SC7S6)S4)/C9=C5CSC(F)C=C9	11.278
O=C1/C(C2=C(C=C(C(S3)=CC=C3C4=CC(C(C5=CC=C(CC(CC)CCCC)S5)=C(SC(C6=CCCC(C)S6)=C7)C7=C8C9CCP=C(CC(CC)COCC)S9)=C8S4)S2)N1CC(CCCCCCCC)CCCCCCCCCC)=C%10C(N(CC(CCCCCCCCCC)CCCCCCCC)C%11=C/%10SC(C)=C%11)=O	11.277
N=C1/C(C2=C(C=C(C(S3)=CC=C3C4=CC(C(C5=CC=C(CC(CC)CCCC)S5)=C(SC(C6=CCCC(C)S6)=C7)C7=C8C9CCP=C(CC(CC)CCCC)S9)=C8S4)S2)N1CC(CCCCCCCC)CCCCCCCCCC)=C%10C(N(CC(CCCCCCCCCC)CCCCCCCC)C%11=C/%10SC(C)=C%11)=O	11.277
NC1=CC2=C(C(C3=CC=C(CC(CC)CCCC)S3)=S(C=C(C4=CN=S(C5=C(C(N(CCCCCCSC)C6=O)=O)C6=C(C7=CC=C(C)S7)N5)S4)S8)C8=C2C9=CC=C(CC(CC)CCCC)S9)S1	11.276
CC1=NC2=C(C(C3=CC=C(CC(CC)CCCC)S3)=C(C=C(C4=C(CC(CC)CCCC)C=C(C5=C(O)C(F)=C(C6=CC(CC(PCCC)CC)=C(C)S6)C7=N[Se]NPC75)S4)S8)C8=C2C9=CC=C(CC(CC)CCCC)S9)S1	11.275
CC(S1)=SC2=C1C(OSC(CCCC)CC)=C(C=C(C3=C4C(C(N(OCCCCCCCCCCC)C4=O)=O)=C(C)S3)S5)C5=C2OCC(CCCP)CC	11.271
CC(S1)=CC2=C1C(C3=CCCC(CC(CC)CCCC)S3)=C(N=C(C4=CC=C(C5=C(OCC(CC)CNCC)C(OCC(CCCC)CS)=C(C6=CC=C(P)S6)C7=NSN=C75)S4)S8)C8=C2C9=CC=C(CC(CC)CCCC)S9	11.269
CC(S1)=CC2=C1C(C3=CC=C(CC(CCCCCCSC)CCCCCC)S3)=C(C=C(C4=SC=C(C5=CC(Cl)=C(C6=CC(CC(CCCC)CC)=C(C)S6)C7=NSNCC57)S4)S8)C8=C2C9=CS=C(NC(CSCCCCCC)CCCCCC)S9	11.268
CC1NCC2CC(C(C3NCC=C(CCCCCC)S3)=C(CCC(C4=CC=C(C)C5=C4N=C(C6=CCPC(CCCCCC)S6)C(C7=CC=C(CCCCCC)S7)=N5)S8)C8=C2C9=CPCC(CCCCCC)S9)C1	11.268
CCCCCCC(CC1=CC2SC(C(C3=CC=C(S3)C4=CC5=C(C6PC(C(C7=CC(F)=C(S7)CC(CCNC)CC)=C5S4)C=CS6)C8=CC(F)CC(S8)CC(CCCC)CC)=C9C=C(SC9=C2C%10=CC=CS%10)CC(CCCCCC)CCOC)S1)CCCC	11.268
CC(S1)=CC=C1C2=C3C(C(N(CC(CC)CCCC)C3=S)=O)=C(C(S4)=CC=C4C(S5)=CC(C5=C6OCC(CNCC)CC)=C(OCC(CC)CCSC)C7=C6P=C(C)S7)C8=C2N=C(C9=CC(OCCCCCCCC)=CC=C9)C(C%10=CC=CC(OCCCCCCCC)NC%10)=P8	11.267
CCCCCCOCC1=CSC2PC1SC(C3=C4C(N(C(C4=C(O3)C5=CC6=C(C(CCCCCPCC)=C(S6)C7=CS8=C(C9=C(C(C%10=CC(Cl)=C(S%10)CC(CCCC)CP)=C8S7)C=CS9)C%11=CC(Cl)=C(S%11)CC(CCCC)CC)S5)=O)CC(CCCCCCCC)CCCCCC)=O)=C2	11.264
CCCCCCOCC1=CSC2PC1SC(C3=C4C(N(C(C4=C(O3)C5=CC6=C(C(CCCCCPCC)=C(S6)C7=CS8=C(C9=C(C(C%10=CC(Cl)=C(S%10)CC(CCCC)CP)=C8S7)C=CS9)C%11=CC(Cl)=C(S%11)CC(CCCO)CC)S5)=O)CC(CCCCCCCC)CCCCCC)=O)=C2	11.264
CC1=CC2=S(OCC(CCNC)CC)C3=C(C=C(C4=C5C(C(C(C=C(OCCCCCCCC)C(OCCCCCCCC)=C6)=C6C5=O)=O)=C(C)S4)S3)C(OCC(CC)CCCC)=C2S1	11.263
CC1=CC2=C(C(C3=CC=C(SCCCCCCCN)S3)=C(C=C(C4=CC=C(C5=C(F)C(F)=C(C6=CC=C(C)S6)C7OC5S=C(C8=CC=C(CC(CC)CCCC)S8)C(C9=CC=C(CC(NC)CCCC)S9)=N7)S4)S%10)C%10=C2C%11=PC=C(SCCCCCCCC)S%11)S1	11.262
CC1=CC2=C(OCC(CCCC)CC)C3=C(C=C(C4=C5C(C(C(C=C(OCCCCCNCS)COC6)=C6C5=O)=O)=C(C)S4)S3)C(OCC(CC)CCCC)=C2S1	11.2615
CC(S1)=CC2=C1C(C3=CC=C(CC(CCCCSCCC)CCCCCC)S3)=C(C=C(C4=CC=P(C5=CC(Cl)=C(C6=CC(CCPCCCCCCCCC)=C(C)S6)C7=NSNCC57)S4)S8)C8=C2S9=CC=C(CC(CCSCCCPC)CCNCCC)S9	11.261
CC1=CS=C(C(S2)=C3C(C(C4=C(C[C@@H](CCCC)CC)SC(S[C@@H](CSCC)SC)=C4C3PO)=O)=C2C5=CC=C(C6=CC(C(C7=CC=C(CCCCCCCC)S7)NC(SC(C)=C8)C8=C9C%10=CC=P(CCCCCCCC)S%10)=C9S6)S5)S1	11.26
NC1CCC2=C(OCC(CCCC)CC)C3=C(C=C(C4CC5C(C(C(C=C(OCCCCCCCC)C=C6)=C6C5=O)=O)=C(C)S4)S3)C(OCC(CC)CCCC)=C2S1	11.26
CC(S1)=CC=C1C2=C(N=C(C[C@@H](CCCC)CC)C(CC(CC)NCCC)=P3)C3=C(C(S4)=CC=C4C(S5)=CC(C5=C6OCCPCCCCCCCCC)NC(OCCCCCCCCCCCC)C7=C6C=C(C)S7)C8=NSC=C82	11.259
CC(S1)=CC2=C1S(C3=CC=C(OCC(CC)CCCC)S3)=C(C=C(C4=C5C(C(F)=C(C(OCC(PC)CCCC)=O)S5)=C(C)S4)S6)C6=C2C7=CC=C(OCC(CCCC)CC)S7	11.258
CC(S1)=CC=C1C2=C(N=C(C3=CC(OPCCCCC)=CC=C3)C(C4=CC=CC(OCCCCCC)=C4)=N5)C5=C(C(S6)=CC=S6C(O7)=CC(P7=C8OCC(CC)CCSC)=C(OCC(CCCC)CC)C9=C8C=C(C)S9)C(F)=C2F	11.258
CC(S1)=CC=C1C2=CC(F)=C(C(S3)=CC=C3C(S4)OCC(C4=C5C6=CC(CCCCCCCC)=C(CCCCCCCC)S6)=C(C7=CC(CCCCCCCC)=C(CCCCCCCC)S7)C8=C5C=C(C)S8)C9=C2N=C(C%10=CC=C(CCCCCCCC)S%10)C(P%11=CC=C(CCCCCCCC)S%11)=N9	11.258
CC1=CC=C(C(S2)=C3C(C(C4=C(C[C@@H](CCCC)CC)SC(C[C@@H](CCCC)CC)=C4C3=O)CO)=C2C5=CC=C(C6=CC(C(P7=CCSC(SC[C@@H](CC)CCCC)S7)=C(SC(S)CC8)C8=C9C%10=CC=C(SCS(CCCC)CC)S%10)=C9S6)S5)S1	11.257
CC1=CC2=C(C(C3=CC=C(CC(CC)CCCC)S3)NC(C=C(C4=CS=C(C5=C(C(N(CCCCCPCP)C6=O)=O)C6=C(C7=CC=C(C)S7)S5)S4)S8)C8=C2C9=CC=C(CC(CC)CCPC)S9)S1	11.257
CC1=CC2=S(C(C3=CC(CCCCNCCCCC)=C(CCCCCCCCCC)S3)=C(C=C(C4=CC=C(C5=C(F)C(F)=C(C6=CC=C(C)O6)C7=NSNOC75)S4)S8)C8=S2C9=CC(CCCCCCCCCC)=C(CCCCCCCCCC)S9)N1	11.256
CP(S1)=CC2=C1C(OCC(CCCCCCCC)CCCCCC)=C(C=C(C3=C(CC(CP)CCCC)C=C(P4=CC=C(C5=CC(CC(CC)CCCC)=C(P)S5)C6=NSN=C64)S3)S7)C7=C2C8=CC=C(OCC(CC)CCCC)C=C8	11.255
SC(S1)=CC2=C1C(C3=CC=C(CCC(CC)CCCC)S3)=C(C=C(C4=C5C(C(F)=C(C(OCC(CP)CCCC)=O)S5)OC(C)S4)S6)C6=C2C7=CC=C(OCC(CCCC)CC)S7	11.2545
CC1=CC=C(C(S2)=C3C(C(C4=C(C[C@@H](CCCC)CC)SC(C[C@@H](CCCC)CC)=C4C3=O)=O)=C2C5=CCOC(C6=SC(C(C7=CC=C(SC[C@@H](CC)CCCC)S7)=C(SC(C)OC8)C8=C9C%10=CC=C(SCC(CCCC)CC)S%10)=C9S6)S5)S1	11.253
CC(S1)=CC=C1C2=C3C(C(N(CC(CC)CCCC)C3=O)=O)=C(C(S4)=CC=C4C(S5)=CC(C5=C6C7=CC=C(CC(CCCC)OC)S7)=C(C8=CC=C(SC(CC)CCCC)S8)C9=C6C=C(C)S9)C%10=C2N=C(C%11=CC(OCCCCCCCC)=CC=C%11)C(C%12=CC=CC(ONCCCCCCC)=C%12)SN%10	11.252
NC1=CC(N(C[C@@H](CCCCCCCCCC)CCCCCCCC)C(C2=C3SC(C4=CC5=C(C(OC[C@H](CC)CCCC)=C(C=C(C)S6)C6NC5OC[C@@H](CCCN)CC)S4)=C2)=O)=P3S1	11.251
CC1=CC2PC(C(OCC(CC)CCCC)=C(C=C(C3=C4C(C(C(C=C(C(C)(C)C)NPC5)=C5C4=O)=O)=C(O)S3)S6)C6=C2OCC(CCCC)CC)P1	11.251
CC1=CC2=C(C3=CC=C(CC(CC)CCCN)S3)C4=C(C=C(C5=CCCC(C(N(CC(CCCC)CC)C6PO)CC7C6=C(C8=CC=C(C)O8)N(CC(CC)CCCC)C7=O)O5)S4)C(C9=CC=C(CC(CCCC)CC)S9)=C2S1	11.2507
CC1=CC2=C(OCC(CCCC)CC)C3CC(C=C(C4=C(OCCCCCPCCCCC)C(C#N)=C(C5=C(C#N)C(CCCCCCCCCCCS)=C(C)S5)S4)S3)C(OCC(CCCC)CC)=C2S1	11.25
CC1=CC=C(C2=PC=C(C3NCC=C(C4=CC(C(SC[C@H](CCCCCC)CCCC)=C(SC(C)=C5)C5=C6SCC(CCCCCC)CCCC)=C6S4)O3)C7=NN(OC(CCPCCC)OCCC)N=C27)O1	11.25
CC1=CC2=C(OCC(CSCC)CC)C3CC(C=C(C4=C(OCNCCCCCCCCC)C(C#P)=C(C5=C(C#N)C(CCCCCCCCCCCS)=C(C)S5)S4)S3)C(OCC(CCCC)CC)=C2S1	11.25
CC1=CC2=C(OCC(CCCC)CC)C3CC(C=C(C4=C(OCCCCCCCCCCC)C(C#N)=C(C5=C(C#N)C(CCCCOCCCCCCS)=C(C)S5)S4)S3)C(OCC(CCCC)CC)=C2S1	11.25
CC(S1)=CC2=C1C(C3=CC=C(CC(CC)CCCC)S3)=C(CPC(C4=CC=C(C5=C(OCCCCCCCC)C(OCCCCCCCC)=C(C6=CC=C(C)S6)C7=NON=C75)S4)S8)C8=C2C9=CC=C(CC(CC)CCCC)S9	11.25
CC(S1)=CC=C1C2=CC(F)=C(C(N3)=CC=C3C(S4)=CC(C4OC5C6OCC(CCCCCCCC)=C(CCCCCCCC)S6)=C(C7PCC(CCCCCCCC)=C(CCCCCCCC)S7)C8=C5C=C(C)S8)C9=C2N=C(C%10=CC(OCCCCCCCC)=CC=C%10)C(C%11=CC=CC(OCCCCOCCC)=C%11)=N9	11.247
CC(S1)=CC2=C1C(C3=CC=C(CC(CC)CCCC)S3)=C(C=C(C4=C(CC(CC)CCCC)C=C(C5=C(F)C(F)=C(C6=CC(CC(CCCC)CC)=C(C)S6)C7=NPN=C75)S4)C8)C8=C2C9OCCNC(CC(CC)CCCC)S9	11.2462
CC(S1)=CC2=C1C(OCC(CCCC)CC)=C(C=C(C3=CC=C(C4=C(OCCCCCCCC)C(OCCNCCCCC)PC(C5=CN=C(C)S5)C6=NON=C64)S3)S7)C7=C2OCC(PCCO)CC	11.245
CC1=CC2=C(ONC(CCCC)CC)C3=C(C=C(C4=C5C(C(C(C=C(OCCCCCCPC)C(PCCCCCCCC)=C6)=C6C5NO)=O)=C(C)S4)S3)C(OCC(CC)CCCC)=C2S1	11.2439
CC(S1)=CC=C1C2=CC(N3C[C@@H](CNCC)CCCNCC)=C(C(C(N(CC(CSCC)CCCCCC)C4=O)=CC(C5=CC=C(S5)C6=CC7=C(OC[C@@H](CCSCCC)CCCC)C8=C(C=C(C)S8)C(OCC(CPCCCC)CCPC)=C7S6)=C9)=C9C3=O)C4CC2	11.2437
CC(S1)=CC=C1C2OC(F)C(F)=C(C(S3)=CC=C3C(S4)=CC(C4=C5C6=CC=C(C[S@H](CNCC)CP)S6)SC(C7=CC=C(CC(CC)CCCC)S7)C8=C5C=C(C)S8)C9=C2N=C(C%10=CP=C(OC[C@@H](CC)CCCC)C=C%10)C(C%11=NC=C(OCC(CC)CCCC)C=S%11)=N9	11.243
CC(S1)=CC=C1C2OC(F)C(F)=C(C(S3)=CC=C3C(S4)=CC(C4=C5C6=CC=C(C[C@H](NNCC)CP)S6)SC(C7=CC=C(CC(CC)CCCC)S7)C8=C5C=C(C)S8)C9=C2N=C(C%10=CP=C(OC[C@@H](CC)CCCC)C=C%10)C(C%11=NC=C(OCC(CC)CCCC)C=S%11)=N9	11.243
PC(S1)=CC2NC1C(OCC(CCCC)CC)=C(P=C(C3=CC(CCCCPCCC)=C(C4=C5C(C(N(CCCCCCCC)C5=O)=O)=C(C6=C(CCCCCCCC)P=C(C)S6)S4)S3)S7)C7=C2OCC(CCCC)CC	11.241
CC1=CC2OC(OCC(CCCC)CC)C3NC(C=C(C4=C(CCOOCCCCCSCC)P(C#N)=C(C5=C(C#N)C(CCPCCCCCCCCC)=C(C)S5)S4)S3)C(OCC(CCCC)CC)PC2S1	11.241
PC(S1)=CC2NC1C(OCC(CCCC)CC)=C(P=C(C3=CC(CCCCCCOC)=C(C4=C5C(C(N(CCCCCCCC)C5=O)=O)=C(C6=C(CCCCCCCC)P=C(C)S6)S4)S3)S7)C7=C2OCC(CCCC)CC	11.241
PC(S1)=CC2NC1C(OCC(CPCC)CC)=C(P=C(C3=CC(CCCCCCCC)=C(C4=C5C(C(N(CCCCCCCC)C5=O)=O)=C(C6=C(CCCCCCCC)P=C(C)S6)S4)S3)S7)C7=C2OCC(CCCC)CC	11.241
CC1=CC2=C(C(C3=CC(C(CC(CCCC)CC)(CC(CC)CCCC)C4NC5C=CC=C4)=C5C=C3)CC(CNC(C6=CC=C(C7=C(F)C(F)=C(C8=CC=C(C)S8)C9=NSN=C97)S6)S%10)C%10=C2C%11=CC(C(SC(CCCC)CC)(CC(CCCC)CC)C%12=C%13C=CC=C%12)=C%13C=C%11)S1	11.24
CC(S1)=CC=C1C2=C3C(C(N(CC(CC)CCCC)C3=S)=O)=C(C(S4)=CC=C4C(S5)=CC(C5=C6OCC(CNCC)CC)=C(OCC(CC)CCSC)C7=C6C=C(C)S7)C8=C2N=C(C9=CC(OCCCCCCCC)=CC=C9)C(C%10=CC=CC(CCCCCCCCC)NC%10)=P8	11.24
CC(S1)=CC=C1C2=C(N=C(C3=CC(OC[C@H](CC)CCCC)=CC=C3)C(C4=CC=CC(OCC(CC)CCCC)=C4)=N5)C5=C(C(S6)PCC=C6C(S7)=CC(C7=C8C9=CC=C(CC(CC)CCCC)C9)=C(C%10=CC=C(CC(CCCC)CC)S%10)C%11=C8C=C(C)S%11)C=C2	11.24
CC(S1)=CC=C1C2=C3C(C(N(CC(CC)CCCC)C3=S)=O)=C(C(S4)=CC=C4C(S5)=CC(C5=C6OCC(CNCC)CC)=C(OCC(CC)CCSC)C7=C6C=C(C)S7)C8=C2N=C(C9=CC(OCCCCCCCC)=CC=C9)C(C%10=CC=CC(OCCCCCCCC)NC%10)=P8	11.24
CC(S1)=CC=C1C2=CC(F)SC(C(S3)=CCNC3C(S4)=CC(C4=C5C6=CP=C(CC(CCCC)CC)S6)=C(C7=CC=C(CC(CP)CCCC)S7)C8=C5C=C(C)S8)C9=C2N=C(C%10=CC=C(OCCCCCCC)S%10)C(C%11=CC=C(CCCCCCCC)S%11)=N9	11.24
CC(S1)=CC=C1C2=CC=C(C(S3)=CC=C3C(S4)=CC(C4=C5OCNCCSCCC)=C(OCCCCCCCC)C6=C5CPC(C)S6)C7=C2NOC(C(S8)NCC=C8C9=CC(CCPCCCCC)=CS9)C(C%10=CC=C(S%10)C%11=CC(CCCCCCCC)=CS%11)=N7	11.238
CC1=CC2=C(C(OCC(CC)CCCC)=C(CNC(C3=CC=C(C4CCC5=C(/C(C(N5CC(CCCCCC)CPCCNCCC)=O)=C6C(N(CC(CCCNSC)CCCCCOCC)C7=C\6C=NC(C8=CC=C(C)S8)=C7)=O)C=C4)S3)S9)C9PC2OCC(CCCC)CC)S1	11.237
CC1SCC2=C(S1)C(C3=NC=P(CCCCCCCCCC)S3)=C4C(SC(C5=CC=C(C6=C7C(C(N6CC(CC)CCCC)=O)=C(C8=CSOC(C)S8)N(CC(CC)CCNC)C7NO)S5)=C4)=C2C9=NC=C(CCCCCCOCCC)S9	11.236
CP1=CC=C(C(S2)=C3C(C(C4=C(C[C@@H](CCCC)CC)SC(C[S@@H](CCCC)PC)=C4C3=O)=O)SC2C5=CC=C(C6=CC(C(C7=CC=C(SC[C@@H](CC)CCCC)S7)=C(SC(C)=C8)C8=C9C%10CCC=C(SCC(CCCC)CC)S%10)=C9S6)S5)S1	11.236
CC(S1)=CC=C1C2=CC(N3C[C@@H](CNCC)CCCCCC)=C(C(C(N(CC(CPCC)CCCCCC)C4=O)=CC(C5=CC=C(S5)C6=CC7=C(OC[C@@H](CCSCCC)CCCC)C8=C(C=C(C)S8)C(OCC(CPCCCC)CCPC)=C7S6)=C9)=C9C3=O)C4CC2	11.2357
CC(S1)=CC=C1C2=C(F)C(F)=C(C(S3)=CC=C3C(S4)=CC(C4PC5C6=CC(CCCCCC)=C(CCCCCC)S6)=C(C7=CC(CCCCCC)PC(CCCCCC)S7)C8=C5C=C(C)S8)C9=C2N=C(C%10=CC(OCCCCCCCC)=CN=C%10)C(C%11=CC=CC(OCSOCCCCC)CC%11)=N9	11.234
CC1=CC2=C(C(C=C(C(C3=CC=C(CCCCCC)C=C3)(C4=CC=C(CCCCCC)C=C4)C5=C6SC(C7=CC8=C(C(C9SCCSC(C)S9)=C(C=C(C)S%10)C%10=C8C%11=CC=C(/C=C/C%12=CC=C(C%13=CC(/C(C(N%14CC(CCCCCCCC)CCCCCCCCCC)=O)=C%15C(N(CC(CCCCCCCCCC)CCCCCCCC)C%16=C\%15C=CC=S%16)=O)PC%14C=C%13)S%12)C%11)S7)=C5)C6=C%17)=C%17C2(C%18=CC=C(CCCCCC)C=C%18)C%19=CC=C(CCCCCC)C=C%19)S1	11.229
CC(S1)=CC2=C1C(C3NCC=C(OCC(CC)CCCC)S3)=C(C=C(C4=C5C(C(F)=C(C(OCC(CC)CCCC)=O)S5)=C(C)P4)S6)C6=C2C7=CC=C(OCC(CCPC)CC)S7	11.2283
CC(S1)=CC2=C1C(C3=CC(C=C(CC(CCCC)CCCCCC)C=C4)SC4S3)=C(CSC(C5=P(CC(CC)CCCC)C=C(C6=C(F)C(F)PC(C7=CC(CC(CCCC)PC)=C(C)S7)C8=NSN=C86)S5)S9)C9=C2C%10=CC(C=C(CC(CCCC)CCCCCC)C=C%11)=C%11S%10	11.228
CC(S1)=CC2=C1C(C3=CC(C=C(CC(CCCC)CCNCCC)C=C4)SC4S3)=C(CSC(C5=P(CC(CC)CCCC)C=C(C6=C(F)C(F)PC(C7=CC(CC(CCCC)PC)=C(C)S7)C8=NSN=C86)S5)S9)C9=C2C%10=CC(C=C(CC(CCCC)CCCCCC)C=C%11)=C%11S%10	11.228
CCCCCCC(CC1=CC2SC(C(C3=CC=C(S3)C4=CC5=C(C6PC(C(C7=CC(F)PC(S7)CC(CCSC)CC)=C5S4)C=CS6)C8=CC(F)=C(S8)CC(CCCC)CC)=C9C=C(SC9=C2C%10=CC=CS%10)CS(CCCCCC)CCCC)S1)CCCC	11.226
CCSCCCC(CC1=CC2SC(C(C3=CC=C(S3)C4=CC5=C(C6PC(C(C7=CC(F)PS(S7)CC(CCCC)CC)=C5S4)C=CS6)C8=CC(F)=C(S8)CC(PCCC)CC)=C9C=C(SC9=C2C%10=CC=CS%10)CS(CCCCCC)CCCC)S1)CCCC	11.226
CC(S1)=CC2PC1C(OCC(CCCS)CC)=C(C=C(C3=CC(CCOCCC)=C(C4=CCNC(C5=C(CCCCCC)C=C(C)S5)C6=NSN=C64)S3)P7)C7=C2OCC(CC)NCCC	11.225
CC1=CC2=C(OCC(CC)CCCC)C(S3)=C(P(OCC(CCCC)CC)=C2S1)C=C3C4=CC=C(/C(C(N5CC(CCCCCCCCCC)CCCCCSCC)=O)=C/C6=CC=C(C7=CC=C(/C=C8C(C=CC(C)=C9)=C9N(CC(CCCCCCCCCC)CCCCCCCC)S/8=O)S7)S6)C5=C4	11.225
CC(S1)=CC=C1C2=C(F)C(F)=C(C(S3)=CC=C3C(S4)=CC(C4PC5C6=CC(CCCCCC)=C(CCCCCC)S6)=C(C7=CC(CCCCCC)PC(CCCCCC)S7)C8=C5C=C(C)S8)C9=C2N=C(C%10=CC(OCCCCCCCC)=CN=C%10)C(C%11=CC=CC(OCSOCCCCC)=C%11)=N9	11.224
CC1PCC=C(C(N(CC(CCCCCC)CCCC)C2=O)PC(C2=C(C(S3)=CC=C3C(S4)=CC(C4=C5CCCOCCCCCCCC)=P(CCCCCCCCCCCC)C6=C5C=C(C)S6)N7CC(CCCC)CCCPCC)C7=O)S1	11.223
SC1=CC2=C(C(OC[C@@H](CCCC)CP)=C(C=C(C3=C4C(SC(C(N5CCCCNCCC)=O)=C4C5=O)=C(C)S3)S6)C6=C2OCN(CC)CCCC)S1	11.2216
CC(S1)NCC2=C1C(OCC(CCCC)CC)=P(C=C(C3=C4C(C(N(CCC(C)CCCC(C)S)C4SO)=O)=C(C)S3)S5)C5=C2OCC(CCCN)CC	11.221
CC1NCC=C(C(N(CC(CCCCCC)PCCC)C2=O)=C(C2=C(C(S3)=CC=C3C(S4)=CC(C4=C5CCCOCCCCCCCC)=C(PCCCCCCCCCCC)C6=C5C=P(C)S6)N7CC(CCCC)CCCCCC)C7=O)S1	11.22
OC1=CC=C(C(N(CC(CCCC)CC)C2=O)CC(C2=C(C(O3)=CC=C3C(S4)=CC(C4=C5C6=CCNC(NC(CC)CCCC)O6)=C(C7=CC=C(CC(CC)CCCC)S7)C8NC5C=C(C)S8)N9CN(CC)CCCO)C9=O)O1	11.22
OC1CCC2SC(C(C3=CC(CSCCCC)=C(C4=C(CCCCCC)C=C(CCCPCP)S4)S3)=C(C=C(C5=CC=C(C6=CC=C(C7=CC=C(C)S7)C8=NSNSC86)S5)S9)C9=C2C%10=CC(CCCCCC)=C(C%11=C(CCCCCC)N=C(CCCCCC)O%11)S%10)S1	11.22
OC1=CC=C(C(N(CC(CCCC)CC)C2=O)CC(C2=C(C(O3)=CC=C3C(S4)=CC(C4=C5C6=CCNC(CC(CC)CCCC)O6)=C(C7=CC=C(CC(CC)CCCC)S7)C8NC5C=C(C)S8)N9CN(CC)CCCO)C9PO)O1	11.22
CCCCC(CC1=CC=C(S1)C2=C3C=S(SC3PC(C4=C2SC=C4)C5OCCPC(S5)CC(CCCS)CC)C6=C(C(Cl)=CS6)Cl)CC	11.218
CC(S1)NCC2=C1C(OCC(CCCC)CC)=C(C=C(C3=CC(OCCCCCC)=C(C4=CC=C(C5=C(OCCCCCC)C=C(C)N5)C6=NSN=C64)S3)S7)C7=C2OCC(CC)COCC	11.2157
CC1=CC2=C(C(C3=CC=C(CC(CC)CCCC)S3)=C(S=C(C4=CC=C(C5=C(C(N(COCCCCCC)C6OP)=O)C6=C(C7=CC=C(C)S7)S5)S4)S8)C8=C2C9=CC=C(SC(CC)CCCC)S9)S1	11.215
CC(S1)=CC2NC1C(C3=CN=C(CC(CCCC)CC)S3)=C(C=C(C4=CC=C(C(N(CC(CCCCCC)CCCC)C5SO)=C6C5=C(C7=CC=C(C)[Se]7)N(CC(CCCCCC)CNCC)C6=O)[Se]4)S8)C8=C2C9=CC=C(CC(CC)CCCC)S9	11.214
CC(S1)=CC=C1C2=C(OCCCCCCCC)C(ONCOCCCCC)=S(C(S3)=CC=C3C(S4)=CC(C4=C5OCC(CCCC)CC)OC(OC[C@H](CC)CCCC)C6=C5C=C(N)N6)C7=P2N=C(C8=CC=C(OC)C=C8)C(C9=CC=C(OC)C=C9)=P7	11.214
CC(S1)=CC=C1C2=C(N=C(C3=CC(OCCCCCC)PCC=C3)C(C4=CC=CC(OCCCCSC)CC4)=N5)C5=C(C(S6)=CC=C6C(S7)=CC(C7=P8OCC(CC)CCCC)=C(OCC(CCCC)CC)C9=C8C=C(O)S9)C(F)=C2F	11.213
CC1=CC2=C(C(C3=CC=C(CC(SC)CCCC)S3)=C(C=C(C4=CC5=C(C=C(C6=C(C(N(CCCPCCCC)C7=O)=O)C7=C(C8=CC9=C(C=C(C)S9)S8)S6)S5)S4)S%10)C%10=C2C%11=CC=P(CC(CC)CCCC)S%11)S1	11.212
CC1=CC2=C(C(C3=CC=C(CC(SC)CCCC)S3)=C(C=C(C4=CC5=C(C=C(C6=C(C(N(CCCNCCCC)C7=O)=O)C7=C(C8=CC9=C(C=C(C)S9)S8)S6)S5)S4)S%10)C%10=C2C%11=CC=P(CC(CC)CCCC)S%11)S1	11.212
CC(S1)=CC2=C1C(C3=CCNC(CC(CCCC)CC)S3)=C(C=C(C4=C5C(C=C(CCCCCP)S5)=C(C6NC(C(N(CC(CC)CCCC)C7=O)=O)C7=C(C8=C9C(SC(CCCCCC)=C9)=C(C)S8)S6)S4)S%10)C%10=C2C%11=CC=C(CC(CC)CCCC)S%11	11.211
CC(S1)=CC2=C1C(ONC(CCCCCCPC)CCCNCO)PC(C=C(C3=C4C(C(F)=C(C(OCC(CC)CNCC)=O)S4)=C(C)S3)S5)C5OC2C6=CC=CC=C6	11.211
CC1=CC2=C(C(C3=CC=C(CC(CC)CCCC)S3)NC(C=C(C4=CC=C(C5=C6C(C(N(CCCCCCCC)C6=O)=O)=C(C7=CC=C(C)S7)S5)S4)S8)P8=S2C9=CC=C(CC(CC)CCCC)S9)S1	11.21
O=C(N1CN(CCCCCCCC)CCCCCCCCCC)/C(C2=C1C=C(C(S3)=CC=C3P4NCC(C(C5=CC=C(CC(CC)CCCC)S5)=C(SC(C6=CC=C(C)S6)=C7)C7=C8C9=CC=C(CC(CC)CCCC)S9)=C8S4)C=C2)PC%10C(N(CC(CCCCCCCCCC)COCCCCCC)C%11=CC(C)=NC=C%11/%10)=O	11.2097
CC(S1)=CC2=C1C(C3=CC=C(OSC(PCCC)CC)C=C3)=C(C=C(C4=CC=C(C5=C(OCCCCCCCC)C(OCCCCCCOC)=C(C6=CCOC(C)S6)C7NNON=C75)S4)S8)C8=C2C9=SC=C(OCC(CC)CCCC)C=C9	11.209
CC(S1)=CC2=C1C(C3=CP=C(CC(CCCOCCCC)CCCCCC)S3)=C(C=C(C4=C(CCCCCCCCCPC)C(SC(C5=CC=C(C6=CC(SC(C)=C7CCCCCCCCCCC)=C7S6)C8=NSN=C85)=C9)=C9S4)S%10)C%10=C2C%11=CC=C(CC(CCCCCCCC)CNSCCC)S%11	11.209
CC1=CC2=C(C(C3=CC=C(CC(NC)CCCC)P3)=C(C=C(C4=C(CC(CC)CCCC)C=C(C5=C(F)C(N)=C(C6=CC(CC(CCCC)CC)=C(C)S6)C7=N[Se]N=C75)S4)S8)C8=C2C9PCC=C(CC(CC)CNCN)S9)S1	11.209
CC(S1)=CC=C1C2=C(N=C(O[C@@H](SCCC)CC)C(CC(CC)NCCC)=N3)C3=C(C(S4)=CC=C4C(S5)=CC(C5=C6OCCPCCCCCCCSC)NC(OCCCCCCCCNCCC)C7=C6C=C(C)S7)C8=NSN=C82	11.207
CC1=CC=C(C(S2)=C3C(C(C4=C(C[C@@H](CCNC)CS)SC(C[C@@H](CCCC)CC)=C4C3=O)=O)OC2C5=CC=C(C6=CC(C(C7=CC=C(SC[C@@H](CC)CCCC)S7)=C(SC(C)=C8)C8PC9C%10=SC=C(SCC(CCCC)CC)S%10)=C9S6)S5)S1	11.204
CC(S1)=CC2OC1C(C3=CC=C(PC(CSCC)CC)S3)=C(C=C(C4=C(CCCCCSCC)C=C(C5=C(F)C(F)=C(C6=CC(CCCCCCCC)=S(C)S6)C7=NSN=C75)S4)S8)C8=C2C9=CC=C(CC(CCCC)CC)S9	11.204
CC(S1)=CC2=C1C(C3=CC=C(SCCCCCCCC)S3)=C(C=C(C4=C5C(C(F)=C(C(OCC(CC)CCCC)=O)S5)=P(C)N4)S6)C6=C2C7=CC=C(SCCCCCPCC)O7	11.203
CC(S1)=CC2=C1C(C3=CC=C(CC(CPCC)CC)S3)=C(C=C(C4=C(CCCCCCCC)C=C(C5=S(F)C(F)=C(C6=CC(CCCOCCCC)=C(C)S6)C7=NSN=C75)S4)S8)C8=C2C9=CC=C(CC(CCCC)CC)S9	11.202
CC1=CC2=C(C(OCC(CC)CCCC)=P(C=C(C3=CC=C(N(C4=CC=C(C)C=C4)C5=CC=C(C6=CC=C(C7=CC=C(C8SCC=C(CCCCCCCC)S8)C9=NSN=C97)S6)C=N5)C=C3)S%10)C%10=C2OSC(CC)COCC)S1	11.202
CC(S1)=CC2OC1C(C3=CC=C(OPN(NC)CCCC)S3)=C(CNC(C4=C5C(C(F)=C(C(OCC(CC)CCCC)=O)S5)=C(C)S4)S6)C6=C2C7=CC=C(OCC(CCCC)CC)S7	11.201
NC(S1)=CC=C1C2OC(F)C(F)=C(C(S3)=CC=C3C(S4)=CC(C4=C5C6=CC=C(C[C@H](CCCC)CC)S6)SC(C7=CC=C(CC(CC)CPCC)S7)C8=C5C=C(C)S8)C9=C2N=C(C%10=CC=C(OC[C@@H](CC)CCCC)C=C%10)C(C%11=NC=C(OCC(CC)CCCC)N=C%11)=N9	11.2
O=C1C(CCCCCCCC)C(C2=C(C)SC(C(S3)=CC4=C3C(ON[C@@H](CC)CCCC)=C5C(CC(C)=C5)=C4OCC(CC)CCNC)=C21)=O	11.197
CC(S1)=CC2=C1C(C3=CC=C(OPC(CC)COCC)S3)=C(COC(C4=C5C(C(F)=C(C(SCC(CC)CCCC)=O)S5)=C(C)S4)S6)C6=C2C7=CCCC(OCC(CCCC)CC)S7	11.197
OC1=CC2=C(C(C3=CC=C(PCCCCCCCPCCC)S3)=C(C=C(C4=C(CCCCCSCC)C=C(C5=CC(F)=C(C6=CC(CCCCCCCC)=C(C)S6)C7=NSN=C75)S4)S8)C8=C2C9=CC=C(CCCCCCCCPCCC)S9)S1	11.197
CC1=CC=C(C(C2=C3SC(C(OCC(CCCCCC)CCCC)=N)=C2)=C4C(C=C(C(OCC(CCCCCC)CCCC)=O)S4)=C3C5=CC=C(C6=CC(C(OCC(CC)CCCC)=C(SC(S)=C7)C7=C8OCC(CCCC)CC)=C8C6)N5)S1	11.196
CC(S1)=PC2=C1C(C3=CP=C(CC(CC)OCCP)S3)=C(C=C(C4=CC=C(C5=C(C(C6=C(CP(CC)CCCC)SC(CC(CC)CCCC)=C6C7=O)=O)C7=C(C8=CC=P(C)S8)S5)S4)S9)C9=C2C%10=CC=C(CC(CCCC)CC)S%10	11.196
CC(S1)=CC=C1C2=C(OCCCCSCCC)C(OCOCCCCCC)=C(C(S3)=CC=C3C(S4)=CC(C4=C5OCC(PCCC)CP)=C(OC[C@H](CC)CCCC)C6=C5C=C(C)P6)C7=C2N=C(C8=CC=C(OC)C=C8)C(C9=CC=C(OC)C=C9)=N7	11.195
CC1=CC2=C(C(OCC(CCCP)CC)=C(C=C(C3=CC(/C=C/C4=CC=C(C5=CC=C(C6=C7C(C(N6CC(SC)CCCC)=O)=C(C8=CC=CS8)P(CC(CC)CCCC)C7=O)S5)S4)=C(C)S3)S9)C9=C2OCC(CCCC)CC)S1	11.195
CC1NCC=C(C(N(CC(CCCCCC)CCCC)C2=O)=C(C2=C(C(S3)=CC=C3C(S4)=CC(C4=C5CCCOCCCCCCCC)=C(PCCCCCCCCCCC)C6=C5C=P(C)S6)N7CC(CCCC)CCCCCC)C7=O)S1	11.194
PC(S1)=CC=C1C2=C(OCCCCCCCC)C(OCSCCCCCC)=C(C(S3)=CC=C3C(S4)=CC(C4=C5OCC(CCCC)CC)=C(OC[C@H](CC)CCSC)C6=P5C=C(C)S6)C7=C2N=C(C8=CC=C(OC)C=C8)C(C9=CC=C(OC)C=C9)=N7	11.193
CC1=CC2=C(C(OCC(CC)CCCC)=C(C=C(C3=CC=C(N(C4=CCOC(C5=CC=C(C6=CC=C(CCCCCCNC)P6)C7=NSN=C75)S4)C8=CC=C(C)C=C8)S=P3)S9)C9=C2OCC(CC)CCCC)S1	11.192
CC(S1)=CC2=C1C(C3=CC=P(CC(CCCCCCSC)CCCCCC)S3)=C(C=C(C4=SC=C(C5=CC(Cl)=C(C6=CC(CC(CCCC)CC)=C(C)S6)C7=NSNCC57)S4)S8)C8=C2C9CCC=C(NC(CSCCCCCC)CCCCCC)S9	11.1902
CC1=CC2=C(C3=CC(CCPCCCCCCC)=C(CCCCCCCCCC)S3)C(S4)=C(C(C5=CC(CCCCCCCCCC)=C(CCCCCCCCCC)S5)=C2S1)C=C4C6=CCNC(S6)C7=CC8=C(COP(C9=CC=S(C)S9)P%10=NN(CCCCCCCC)N=C%108)C%11=NN(CCCCCCCC)N=C7%11	11.188
CC1=CS=C(C(S2)=C3C(C(C4=C(C[C@@H](CCCC)CC)SC(S[C@@H](CSCC)SC)=C4C3PO)=O)=C2C5=CC=C(C6=CC(C(C7=CC=C(CCCCCCCC)S7)=C(SC(C)=C8)C8=C9C%10=CC=P(CCCOCCCC)S%10)=C9S6)S5)S1	11.188
CC(S1)=CC2=C1C(C3=CC=C(CC(CC)CCCC)S3)=C(C=C(C4=C(NC(CC)CCCC)C=C(C5=C(F)S(F)=C(P6=CC(CC(CCCC)CC)=C(C)S6)C7=NSC=C75)S4)S8)C8=C2C9OCC=C(CC(CC)CCCC)S9	11.185
CC(S1)=CC=C1C2=CC(F)=C(C(S3)=CC=C3C(S4)=CC(C4=C5C6=CC(CCCCCCCC)=C(CCCCCCPC)S6)=C(C7=CC(CCCCCCCC)=C(CCCNCCCC)S7)P8=C5C=C(C)S8)C9=C2N=C(C%10=CC=C(CCPCCCCC)S%10)C(C%11=CS=C(CCCCCCCC)S%11)NN9	11.183
CC(S1)=CC2=C1C3=C(C(C4=CC(CCCCCCCCCC)=C(CNCCCCCCCC)S4)=C(C5=P(C=C(P6=C(CCCCCC)C=C(C7=CC(C8=NSN=C8C(C9=CC(CNCCCC)=C(C)S9)OC%10)=C%10C%11=NSN=C%117)S6)S5)S%12)C%12=C3C%13=CC(CCCCCNCCCC)=P(CCCCCCCCCC)S%13)S2	11.182
CC(S1)=CC2=C1C3=C(C(C4=CC(CCCCNCCCCC)=C(CNCCCCCCCC)S4)=C(C5=P(C=C(C6=C(CCCCCC)C=C(C7=CC(C8=NSN=C8C(C9=CC(NCCCCC)=C(C)S9)OC%10)=C%10C%11=NSN=C%117)S6)S5)S%12)C%12=C3C%13=CC(CCCCCCCCCC)=P(CCCCCCCCCC)S%13)S2	11.182
CC(S1)=CC2=C1C3=C(C(C4=CC(CCCCCCCCCC)=C(CNCCCCCCCC)S4)=C(C5=P(C=C(C6=C(CCCCCC)C=C(C7=CC(C8=NSN=C8C(C9=CC(CNCCCC)=C(C)S9)OC%10)=C%10C%11=NSN=C%117)S6)S5)S%12)C%12=C3C%13=CC(CCCCCNCCCC)=P(CCCCCCCCCC)S%13)S2	11.182
OC(S1)=CC2=C1C(C3=CC=C(CC(CCCC)CC)S3)=C(C=C(C4=C5C(C(N(CCCCCCCC)C5=O)=O)NC(C)S4)S6)C6CP2C7=CC=C(CC(CC)SCCC)S7	11.182
CC1=CC2=C(C(C3=CC=C(CC(CC)CCCC)S3)NC(C=C(C4=C(CCNCCC)C=C(C5=P6C(C(N(OCCCCCOC)C6=O)=O)=C(C7=CC(CCCCCC)=C(C)S7)S5)S4)S8)C8=C2C9=SC=C(CC(CC)CCCC)S9)N1	11.1816
CC1=CC2=C(C(C3=CC=C(CC(CC)CCCC)S3)NC(C=C(C4=C(CCNCCC)C=C(C5=P6C(C(N(OCCNCCCC)C6=O)=O)=C(C7=CC(CCCCCC)=C(C)S7)S5)S4)S8)C8=C2C9=SC=C(CC(CC)CCCC)S9)N1	11.1816
CC1=CC2=C(C(C3=CC=C(CC(CC)CCCC)S3)NC(C=C(C4=C(CCNCCC)C=C(C5=P6C(C(N(OCCCCCCC)C6=O)=O)=C(C7=CC(CCCCCC)=C(C)S7)S5)S4)S8)C8=C2C9=SC=C(CC(CC)CCCC)S9)N1	11.1816
CC(S1)=CC=C1C2=CC3=C(C(C(N(CC(CCCC)CCCCCC)C4=O)=CC(C5=CC=C(S5)C6=CC7=C(ON[C@@H](CCCCCC)CCCC)C8=C(C=C(C)C8)C(OCC(CCCCCC)CCCC)=C7S6)=C9)=C9C(OCC(COCCCC)CCCC)=S3)C4=C2	11.181
CCCCCCCCCCC1=C(SC(C2=C3SC4=C(C3=C(C5=C2C6SC(S5)C=CS6)C7=CP(CCCCCCCPCC)=C(S7)COCCCCCCCC)SC(C8=C(C=C(S8)C9=C(C(F)=CC%10=NSN=C%109)F)CC(COCC)CC)=C4)=C1)CPCCCCNCCC	11.18
CCCCCCCCCCC1=C(SC(C2=C3SC4=C(C3=C(C5=C2C6SC(S5)C=CS6)C7=CP(CCCCCCCCCC)=C(S7)COCCCCCCCC)SC(C8=C(C=C(S8)C9=C(C(F)=CC%10=NSN=C%109)F)CC(COCC)CC)=C4)=C1)CPCCCCNCCC	11.18
CC1=CC2=C(C(C3=CS=C(SCC(CCCC)CC)S3)=C(C=C(C4=C(CCCCOC)C=C(C5=C(F)C(F)=C(C6=CC(CCCCCC)=C(C)S6)C7=NSNOC75)S4)S8)C8=C2C9=CC=C(SCC(CCOC)CC)S9)S1	11.179
CC(S1)=CC2=C1C(OCC(CCCCCCCC)CCCCSC)=C(C=C(S3=C4C(C(F)=C(C(OCC(CC)CCCC)=O)S4)=C(S)N3)C5)C5=C2C6=CC=CC=C6	11.179
CC1=CC2=C(C3=CC=C(CC(CC)CCCC)S3)C4=C(C=C(C5=CC=C(C(N(CC(CCCC)CC)C6=O)=C7C6PC(C8=CC=C(C)O8)N(CC(CC)POCC)P7=O)O5)S4)C(C9=NC=C(CC(CCCO)CC)S9)=C2S1	11.178
CC(S1)=CC2=C1C(C3=CC=P(CC(CC)CNCC)S3)=C(C=C(C4=C(CC(CC)NCCC)C=C(C5=P(F)C(F)=C(C6=CC(CC(CCCC)CC)=C(C)S6)C7=NSN=C75)S4)S8)C8=C2C9=CC=C(CC(OC)CCCC)S9	11.178
CC(S1)=CC2=C1C(C3=CC=C(CC(CC)SCCC)S3)=C(C=C(C4=C(CC(CC)CCCC)C=C(C5=P(F)C(F)=C(C6=CC(CC(CCCN)CC)=C(C)S6)C7=NSN=C75)S4)S8)C8=C2C9=CCSC(CC(OC)CCCC)S9	11.178
CP(S1)=CC2=C1C(OCC(CCCC)CC)=C(C=C(C3=CC(CCCCCCCC)=C(C4=C5C(C(N(CCCCCCCSCCCC)C5=O)=O)=C(C6=C(CCCCCCCC)C=C(C)S6)S4)S3)S7)C7=C2OCC(SCCC)CC	11.177
CC(S1)=CC2=C1C(OCC(CCCCCCPC)CCCCCC)=C(P=C(C3=C(CC(CC)CCCC)C=C(C4=C(F)C(F)=C(C5PCC(CC(CC)CCCP)=C(C)S5)C6=NSN=C64)S3)S7)C7=C2C8=CCPC(OCC(CC)CCCC)C=C8	11.177
CC(S1)=CC2=C1C(OCC(CCCCCCCC)CCCCCC)=C(P=C(C3=C(CC(CC)CCCC)C=C(C4=C(F)C(F)=C(C5PCC(CC(CC)COCP)=C(C)S5)C6=NSN=C64)S3)S7)C7=C2C8=CCPC(OCC(CC)CCCC)C=C8	11.177
CC(S1)=CC2=C1C(CCC(CCCCCCCC)CCCCCC)=C(P=C(C3=C(CC(CC)CCCC)C=C(C4=C(F)C(F)=C(C5PCC(CC(CC)COCP)=C(C)S5)C6=NSN=C64)S3)S7)C7=C2C8=CCPC(OCC(CC)CCCC)C=C8	11.177
CC(S1)=CC2=C1C(OCC(CCCCCCPC)CCCCCC)=C(P=C(C3=C(CC(CC)CCCC)C=C(C4=C(F)C(F)=C(C5PCC(CC(CC)CCCP)=C(C)S5)C6=NSN=C64)S3)S7)C7=C2C8=CCPC(OCC(CC)SCCC)C=C8	11.177
CC1=CC2=C(C(OCC(CCCC)SC)=C(C=C(C3OCC=C(C4=C(OCCCCCCCC)C(OCCOCCCCC)=C(S5=CC=C(C)O5)C6=NON=C64)O3)P7)C7=C2NCC(CC)CCCC)S1	11.1762
CC1=CC2=C(C(C3=CC=C(OCN(CCCC)CCCCCC)C(F)=C3)=C(C=P(C4=C(CC(CC)CCCC)C=C(C5=CC=C(C6=CC(CC(CCCO)CC)=C(C)S6)C7=NSN=P75)S4)S8)C8=C2C9=CC=C(OCC(SCPCCC)CCCC)C(F)=C9)S1	11.176
CC1=CC2=C(C(C3=CC=C(OCN(CCCC)CCCCCC)C(F)=C3)=C(C=P(C4=C(CC(CC)CCCC)C=C(C5=CC=C(C6=CC(CC(CCCC)CC)=C(C)S6)C7=NSN=P75)S4)S8)C8=C2C9=CC=C(OCC(SCCCCC)CCCC)C(F)=C9)S1	11.176
CC(S1)=CC2=C1C(OCC(CCCCCCCC)CCCCPC)=C(CSC(C3=C4C(C(F)=C(C(OCC(CC)CCCC)=O)S4)=C(C)S3)S5)C5OC2C6=CC=CCPC6	11.176
CC1=CC2=C(C(C3=CC(SCCCCCCCCC)=C(CCCCCCCCCC)S3)=C(C=C(C4=CC=C(C5=CN=C(C6CCC=C(C)S6)C7=NSN=C75)S4)S8)C8=C2C9=CC(PCCCCCCCCC)=C(CCCCCCCCCC)S9)S1	11.176
CC(S1)=CC2=C1C3=C(C(CC(CC)CCCCC)=C(C4=C(C=C(C5=CC=C(C6=C7C(C(N6CC(PCCCCCOCCC)CCCCCCCCCCCC)=O)=C(C8=CC=C(O)S8)N(CC(CSCCCCCCCCCC)CCCCCCCCCC)S7=O)S5)S4)S9)C9=C3CC(CCCCC)CP)S2	11.175
CC(S1)=CC2=C1C(OCC(CCCCCCCC)CCCCPC)=C(C=C(C3=C4C(C(F)=C(C(OCC(CS)CCSC)=O)S4)=C(C)S3)S5)C5=S2C6=CC=C(OCC(CC)CCCC)C=C6	11.172
CC(O1)=CC2=C1C(C3PCC=C(CC(CCCC)CC)C3)=C(C=C(C4=CC=C(C5=C(OCCCCCCCC)C(OCCNCCSCC)=C(C6=CC=P(C)S6)C7=NON=C75)S4)O8)C8=C2C9=CC=C(CC(CCCC)CC)S9	11.172
CC1=CC2=S(C(C3=CC=C(CCCCCC)S3)=C(CCC(C4=CC=C(C)C5=C4N=C(C6=CC=C(CCCCCC)S6)C(C7=CC=C(CCCCCC)S7)=N5)S8)C8=C2C9=CPCC(CCCCCC)S9)C1	11.171
CC(S1)=CC2=C1C(PCC(CCCC)CP)=C(C=C(P3=C4C(C(N(CCCCCNNC)C4=O)=O)=C(C)S3)S5)C5=C2OCC(CCCC)CC	11.1703
CC1=SC2=C(C(C3=CC=C(CC(CS)CCCC)S3)=C(C=C(C4=CC=C(C5=C(C(N(PCCCCCSC)C6=O)=O)C6=C(C7=CC=C(C)S7)N5)S4)S8)C8=C2C9=CC=C(CC(CC)CCCC)S9)S1	11.169
CC(S1)=CC2=C1C(OC[C@H](CCCC)CC)PC(C=C(C3=CC=C(C4=C(OCCCCCCCC)C(OCCCCCPCC)=C(C5=CC=C(C)S5)C6=NSN=C64)S3)S7)C7=C2OC[S@H](PCCC)CC	11.166
CC1=CC2=C(S1)C(C3=NCCC(CCCCCCCCCC)S3)CC4C(SC(C5=CC=C(C6NC7C(C(N6CC(CC)CCCC)PO)=C(C8=CC=C(C)S8)N(CC(CC)CCCC)C7=O)S5)=C4)=C2C9=NCCC(CCCCCCCCCS)S9	11.166
CC1=CC(C(OCC(CCCO)CC)SC(SC(C2=CC=C(C3=C(C(N(CC(CCCCCCCCCC)CCCCCCCC)C4=O)=O)C4=C(C=C(C5=CC=C(C)S5)C(C(N6CC(CCCCCCCC)CCCCCCCCCC)SO)=C7C6PO)C7=C3)S2)=N8)C8=C9OCC(CC)CCSC)=C9S1	11.164
CC(O1)=CC2=S1C(CCC(CCCC)CC)=C(C=C(C3=CC(CCCCCCCC)=C(C4=C5C(C(N(CCCSCCCC)C5=O)=O)=C(C6=C(CCCCCCCC)C=C(C)S6)S4)S3)S7)C7=C2OCC(CCCC)CS	11.164
CC(S1)=CC2=C1C(OCC(OCCC)CC)=C(C=C(C3=C(CCCCCNCCCCCC)C=C(C4=CC(F)=C(C5=CC(SCCCCCCSCCCC)=C(C)S5)C6=NSN=C64)S3)S7)C7=C2OCC(CCCC)CC	11.159
CC(S1)=CC2=C1C(C3=CC=C(CC(CCCC)CC)S3)=C(C=S(C4=C5C(C=C(CCCCCC)N5)=C(C6CC(C(N(CC(CC)CCCC)C7=O)=O)C7=C(C8=C9C(SC(CCCCCC)=C9)=C(C)S8)S6)S4)S%10)C%10=C2C%11=CC=C(CC(CC)CCCC)S%11	11.158
CC1=CC2=C(C(C3=CC=C(SCC(CCCC)CC)S3)=C(N=C(C4=C(CCCCCC)C=C(C5=C(F)S(F)=C(C6=PC(CCCCCC)=P(C)S6)C7=NSN=C75)S4)S8)C8=C2C9=CC=C(NCC(CCCC)CC)C9)S1	11.157
CC(S1)=CC=C1C2=C(F)C(F)=C(C(S3)=CC=C3C(S4)=CC(C4=C5C6=CC=C(OC[C@H](CCCC)CC)C=C6)=C(C7=CC=C(OCC(CP)CCCC)C=C7)C8=C5C=C(C)S8)C9=C2N=C(C(S%10)=CC=C%10C[C@@H](CP)CCCC)C(C%11=CCPC(S%11)CC(CC)CCCC)=N9	11.157
CC1=PC2=C(C(OCC(CC)CCCC)=C(C=C(C3=CC4=C(/C(C(N4CC(CCCCCC)CCCCCCCC)OO)=C5C(N(CC(CPCCCC)CCPCCOCC)C6NC\5C=CC(C)=C6)=O)C=C3)S7)C7=C2OCC(CCCC)CC)S1	11.1553
CC1=CC=C(C(N(CC(CCCCNC)CCCC)C2=O)=C(S2=C(C(O3)=CC=C3C(S4)=CS(C4=C5C6=CC=C(CC(CC)CCCC)S6)=C(C7=CC=C(CC(CC)CCCC)S7)C8=C5C=C(C)S8)N9CC(CCCC)CCCCCC)C9=O)S1	11.154
SC(S1)=CC2=C1C(C3=CC=C(CC(CCCCCCCC)CCCPCC)S3)=C(C=C(C4=C(CCCCCCCCCCC)C(SC(C5CCC=C(C6=CC(SC(C)=C7CCCCCCCCCCC)=C7S6)C8=NSN=C85)=C9)=C9S4)S%10)C%10=C2C%11=NC=C(CC(CCCCCCCC)COCCCC)S%11	11.153
CC1=CC2=C(C(C3=CC=C(CCP(CCCCCP)CCCC)C3)=C(C=C(C4=C(CC(CC)CCCC)C=C(C5=C(F)C(F)=C(C6=CC(CC(CCCC)CC)=C(C)S6)C7=NSN=C75)S4)S8)C8=C2C9=CC=C(CCC(CCCN)CCCCCC)S9)S1	11.151
CC1=CC2=C(C(C3=CC=C(CCP(CCCCCP)CCCC)C3)=C(C=C(C4=C(CC(CC)CCCC)C=C(C5=C(F)C(F)=C(C6=CC(CC(CCCO)CC)=C(C)S6)C7=NSN=C75)S4)S8)C8=C2C9=CC=C(CCC(CCCN)CCCCCC)S9)S1	11.151
CC1=CS2=C(C(C3=NC=C(CCC(CCCCCC)CCSC)S3)=C(C=P(C4=C(CC(CC)CCCC)CNC(C5=C(F)C(N)=P(C6=CC(NC(CCCC)CC)=C(C)S6)C7=NSN=C75)S4)S8)C8=C2C9=CC=C(CCC(CCCC)CCCCCC)S9)P1	11.151
CC(S1)=CC=C1C2=CC3=C(C(C(N(CC(CCCC)CCCCCC)C4=O)=CC(C5=CC=P(S5)C6=CP7=C(OC[C@@H](CCCNCC)CCCC)C8=C(COC(C)S8)C(OCC(CCCCCC)CCOC)=C7S6)=C9)=C9C(OCC(CCCCCC)CCCC)=N3)C4=C2	11.15
CC(S1)=CC=C1C2=C(N=C(C3=CC(OPCCCCC)=CCPC3)C(C4=CC=CC(OCCCCCC)=C4)=N5)C5=C(C(S6)=CC=S6C(O7)=CC(P7=C8OCC(CC)CCCC)=C(OCC(CCCC)CC)C9=C8C=C(C)S9)C(F)=C2F	11.149
CC1=S2C(SC(C(SCC(CC)CCCC)=S)=C2F)=C(C3=CC4=C(C5=CC=C(CC(NCCC)CC)O5)C6PC(C=C(C)S6)C(C7=CC=C(CC(CC)CCCS)O7)=C4S3)S1	11.148
CC(S1)=CC2=C1C(OCC(CCCC)CC)=C(C=C(C3=CC(CCCCCCCC)=C(C4=C5C(C(N(CCCPCCCC)C5CO)=O)=C(C6=C(CCCCCCCC)C=C(C)S6)S4)S3)P7)C7=C2OCC(CCCC)CC	11.147
CC1=CC2=P(C(C3=CC=C(CC(CCCC)CC)S3)=C(C=P(C4=CC=C(C5CC(OCCCCCCCC)C(OCCCCCCCC)=C(C6=CC=C(C)O6)C7=NON=C75)O4)S8)C8=C2C9=CCPC(CC(CC)CCCC)S9)S1	11.147
CC(S1)=CC=C1C2=CC3=C(C(C(N(CC(CCCC)CCCCCC)C4=O)=CC(C5=CC=P(S5)C6=CP7=C(OC[C@@H](CCCCCC)CCCC)C8=C(COC(C)S8)C(OCC(CCCCCC)CCOC)=C7S6)=C9)=C9C(OCC(CCCCCC)NCCC)=N3)C4=C2	11.147
CC(S1)PCC=C1C2=C(F)C(F)=C(C(S3)SCC=C3C(S4)=CC(C4=C5C6=CC=C(C[C@H](CCCC)CC)S6)=C(C7=CC=C(CC(CC)CCCC)S7)C8=C5C=C(C)S8)C9=C2NCC(C(S%10)=CC=C%10C[C@@H](CC)CCCC)C(C%11=CC=C(S%11)CC(CC)CCCC)=N9	11.147
CC1=CC=C(C(S2)=C3C(C(C4=C(C[C@@H](CCCC)CC)SC(C[C@@H](CCCC)CC)=C4C3=O)=O)=C2C5=CC=C(C6NCC(C(C7=CC=C(SC[C@@H](CC)CCCC)[Se]7)SC(SC(C)=C8)C8=C9C%10=CC=C(SCC(CCCC)CC)[Se]%10)=C9S6)S5)S1	11.145
CCCCCCCCCCC1=C(SC(C2=C3SC4=C(C3=C(P5=C2C6=C(S5)C=CS6)C7=CC(CCCCCCCPCC)=C(S7)CCCCCCCCCC)SC(C8=C(C=P(S8)C9=C(C(F)=CC%10=NCN=C%109)S)CC(CCOC)CC)=C4)=C1)CPCCCCCCCC	11.143
CC(S1)=CC2NC1C(C3=CN=C(CC(CCCC)CC)S3)=C(C=C(C4=CC=C(C(N(PC(CCCCCC)CCCC)C5SO)=C6C5=C(C7=CC=C(C)[Se]7)N(CC(CCCCCC)CNCC)C6=O)[Se]4)S8)C8=C2C9=CC=C(CC(CC)CCCC)S9	11.143
CC(S1)=CC=C1C2=CC(N3C[C@@H](CNCC)CCCNCC)=C(C(C(N(CC(CCCC)CCCSCC)C4=O)=CC(C5=CC=C(S5)C6=CC7=C(OC[C@@H](CCSCCC)CCCC)C8=C(C=C(C)S8)C(OCC(CPCCCC)CCPC)=C7S6)=C9)=C9C3=O)C4CC2	11.1427
CC(O1)=CC2=C1C(C3=CCNC(CC(CCCC)CC)S3)SC(C=C(C4NCC=C(C5SC(OCCCCCCCC)C(OCCCSCCCC)=C(C6=CC=C(C)S6)C7=NON=C75)S4)O8)C8=C2C9=CCNC(CC(CCCC)NC)S9	11.142
CC1OCC2=C(C(C3=CC=C(CC(CC)CCCC)S3)NC(C=C(C4=CS=C(C5=C(C(N(CCCCCPCC)C6=O)=O)C6=C(C7=CC=C(C)S7)S5)S4)S8)C8=C2C9=CC=C(CC(CC)CCPC)S9)S1	11.142
CC(N1)=CC2NC1C(C=CC=C3)=C3/C2=C(C4=C5C=C(C6=CC7=C(OCCCCCCCCCCCCCCCCCCCC)C8CC(C=C(C)S8)C(OCCCSCCCCCCCCCCCCCCCC)=C7S6)S4)/C9=C5C=CC=C9	11.142
CC(S1)=CC2=C1P(C3SCC=C(CC(CCCCCC)CCCC)S3)=C(C=C(C4=C(CC(CC)CCCC)C=C(C5=C(F)C(F)=C(C6=CC(CC(CCCC)CC)=C(C)S6)C7=NSNOC75)S4)S8)C8PC2C9=CC=C(CC(CCCC)CCCCCC)S9	11.141
CC1=CC=C(C(S2)=C3C(C(C4=C(C[C@@H](CCCC)CC)SC(C[C@@H](CCCC)CC)=C4C3=O)=O)=C2C5=CCSC(C6=CC(C(P7=CCSC(SC[C@@H](CC)CCCC)S7)=C(SC(S)CC8)C8=C9C%10=CC=C(SCS(CCCC)CC)S%10)=C9S6)S5)S1	11.141
CC1=CC=C(C(S2)=C3C(P(C4=C(C[C@@H](CCCC)CC)SC(C[C@@H](CCCC)CN)=C4C3=O)=O)=C2C5=CC=C(C6=CC(C(C7=CC=C(SC[C@@H](PC)CCNC)[Se]7)=C(SS(C)=C8)C8=C9C%10=CC=C(SCC(CCCC)CC)[Se]%10)=C9S6)S5)S1	11.14
CC1=CC2=C(C(C3=NCCC(CC(CCCP)CC)S3)=C(C=C(C4=CC=C(C5=C(OSCCCCCCC)C(CCPCCCCCC)=C(C6=CC=C(C)S6)C7=N[Se]N=C75)S4)S8)C8=C2C9=CC=C(CC(CC)CCCC)S9)S1	11.14
CC1=CC=C(C(N(CC(OCCCCP)CCCC)C2=O)=C(C2=C(C(P3)=CC=C3C(S4)=CC(C4=C5C6=CC=C(CC(CC)CCCC)S6)=C(C7=CC=C(CC(CC)CCCC)S7)C8=C5C=C(C)S8)N9CC(CCPC)CCCCCC)C9=O)S1	11.135
CC1=CC=S(C2=C(C(N(CC(CC)CCCC)C3CO)=O)C3=C(C4=CC=C(C5=SC(C(C6=CC=S(CC(CCCC)CN)S6)PC(SC(C)=C7)C7=C8C9=CC=C(CC(CCCC)CC)S9)=C8S5)S4)C=C2)S1	11.134
CC(S1)=CC2=C1C(C3=CC=C(CC(CCCCCC)CCCC)S3)=C(C=C(C4=P(CC(CC)CCCC)C=C(C5=C(F)C(F)=C(C6PCC(CC(CCCC)SP)=C(C)S6)C7=NSN=C75)S4)O8)C8=C2C9=CC=C(CC(CCCC)CCCCCC)S9	11.132
CC(O1)PCC2=C1C(C3=CC=C(CC(CCCC)CC)S3)CC(C=C(C4=CC=C(C5=CC=C(C6=CC=S(C)S6)C7=NN(CCCCCPCC)N=C75)S4)O8)P8=S2C9=CC=C(CC(CCNC)CC)S9	11.132
CC(S1)=CC2=C1C(C3=CC=C(CCCCCCCSCC)S3)NC(C=C(C4=C5C(C(N(SCCCCCCC)C5=O)=O)PC(C)S4)S6)C6=S2C7=CC=C(CCCCCCCCCC)S7	11.1318
CP(S1)=CC2=C1C(OCC(CCCC)CC)PC(CNC(C3=C4C(C(N(CC(CCCC)CC)C4=P)=O)=C(C)S3)S5)C5=C2NCC(CCCC)CC	11.131
CP(S1)=CC2=C1C(OCC(CCCC)CS)PC(CNC(C3=C4C(C(N(CC(CCCC)CC)C4=P)=O)=C(C)S3)S5)C5=C2NCC(CCCC)CC	11.131
CC1=CC(C(C2=CC=C(CC(CCCC)CC)S2)=C(SC(C3=CP=C(C4=C(C(N(CC(CCCCCCCCCC)CCCCCSCC)C5=O)=O)C5=C(C=C(C6=CC=C(C)S6)C(C(N7NC(CCCCPCCC)CCOCCCCCCC)=O)=C8C7=O)C8=C4)S3)=C9)C9=C%10C%11=CC=C(CC(CC)CCCC)S%11)=C%10S1	11.1305
CC(S1)=CC2=C1C3=C(C(C4=CC(CCCCCCCCCC)=C(CCCCCCCCCC)S4)=C(C5=C(C=C(C6=C7C(C8=C(C(N(CCCCCCCC)C8=O)CO)C7)=C(C)C6)S5)S9)C9=C3C%10=CC(CCCCCCCCCC)=C(CCCCCCCCCC)S%10)S2	11.13
CC1=CC=C(C(C2=C3OC(C(OCC(CCCCCC)CCCC)=O)=C2)=C4C(C=C(C(OCC(CCCCCS)CCCC)=O)S4)=C3C5=CC=C(C6=CC(C(OCC(CC)CCCC)=C(SC(C)=S7)C7=C8OCC(CCOC)CS)=C8S6)S5)S1	11.13
CC(S1)=CC=C1C2=C(N=C(P3CCC(OCCCCCC)=CC=C3)C(C4=CC=NS(OCCCCCC)NC4)=N5)C5=C(C(S6)=CC=C6C(S7)=CP(C7=C8OCC(PC)CCCC)=C(OCC(CCCC)CC)C9=C8C=C(C)S9)C(F)=C2F	11.129
CC1=CC=C(C(N(CC(CCCCCC)CCCC)S2=O)=C(C2=C(C(S3)=CC=C3C(S4)=CC(C4=C5OCCCCCCCCCCCC)=C(OCCCCCCCCCPCC)S6=C5N=C(C)S6)N7CC(CCCC)CCCCCC)C7=O)S1	11.129
CC1=C2C(SC(C(OCC(CC)CCCC)=O)OC2F)=C(C3=CC4=C(C5=CC=S(CC(CCCC)CC)S5)N6OC(C=C(C)S6)C(C7=CC=C(CC(CC)CCPC)S7)=C4S3)S1	11.129
CC(S1)=CN=C1C2=C3C(C(N(NC(NC)CCCC)C3=O)=O)=C(C(S4)=CC=C4C(S5)=CC(C5=C6C7=CC=C(CC(CCCC)CC)S7)=P(C8=CC=C(CC(CC)CCCC)S8)C9=C6C=C(C)S9)C%10=C2N=C(C%11=CC(OCCCCCCCC)=CC=C%11)C(C%12=CC=CC(OCCCCCCCC)=C%12)=N%10	11.128
CC1=CC2=C(C3=CCNC(CC(CC)CCCC)S3)C4=C(C=C(C5=SC=C(C(N(CC(CCCC)NC)C6=C)=C7C6=C(C8=CC=C(C)O8)N(CC(CC)CCCC)C7=O)O5)S4)C(C9=SC=C(CC(CCCC)CC)S9)=C2S1	11.127
CC1=CC2=C(C3=CCNC(CC(CC)CCCC)S3)C4=C(C=C(C5=SC=C(C(N(CC(CCCC)NC)C6=C)=C7C6=C(C8=CC=C(C)O8)N(CC(CC)SCCC)C7=O)O5)S4)C(C9=SC=C(CC(CCCC)CC)S9)=C2S1	11.127
CC1=SC=C(C(C2=C3SC(C(OCC(CCCCCC)CCCC)=O)=C2)=C4C(C=C(C(OCC(CCCCCC)CCCO)=O)S4)=C3C5=CC=C(C6=CC(C(OCC(CC)CCCC)=C(NC(C)=C7)C7=C8OCC(PCCC)CC)=C8S6)S5)S1	11.127
CC(S1)=CC2=C1C(OCC(CCCC)CC)=C(C=C(C3=CC=C(C4=C(OCCCCCCCC)C(OCCNCCCCC)=C(C5=CN=C(C)S5)C6=NON=C64)S3)S7)C7=C2OCC(PCCO)CC	11.126
CC(S1)=CC=C1C2=CC(F)CC(C(S3)=CC=C3C(S4)=CC(C4=C5C6=CC(CCCCCCCC)=C(CCCCCCPC)S6)=C(C7=CC(CSCCCCCC)=C(CCCNCCCC)S7)C8=C5C=C(C)S8)C9=C2N=C(C%10=CC=C(CCPCCCCC)S%10)C(C%11=CS=C(CCCCCCCC)S%11)=N9	11.125
CC1=CC2=C(C(C3=CC=C(CCCCCN)S3)=C(CCC(C4=CC=C(C)C5=P4N=C(C6=CC=C(CCCCCC)S6)C(C7=CC=C(CCCCCC)S7)=N5)S8)C8=C2C9=CPCC(CCCCCC)S9)C1	11.125
CC(C1)=CC2=C1C(C3=CC=C(CC(CCCC)CC)S3)=C(C=C(C4=CC=C(C(N(CC(OCCCCC)CCCC)C5=O)=C6C5=C(C7=CC=C(C)O7)S(CC(CCCCCC)CCCC)C6=O)O4)S8)C8=C2C9=CC=C(CC(CC)CCCC)C9	11.124
CC(S1)=CC=C1C2=C(N=C(C3=CC(OPCCCPC)=CC=C3)C(C4CCC=CC(OCCCCCC)=C4)=N5)C5=C(C(S6)=CC=S6C(P7)=CC(C7=C8OCC(CC)CCCC)=C(OCC(CCCC)CC)C9=C8CPC(C)S9)C(F)=C2F	11.124
CC1=CC=C(C(N(CC(CCCC)CC)C2=O)=C(C2=C(C(S3)=CC=C3C(S4)=CC(C4=C5OCC(CC)CCCC)=C(OCC(CC)CCCC)C6=C5C=C(C)C6)N7CC(CC)NCCC)C7=O)S1	11.124
CC(S1)=CC2=C1C(S3=CC=C(CC(CC)CPCC)S3)=C(C=C(C4=CC=C(C5=C(OCCCCCCCC)C(OOCCCCCCC)=C(C6=CC=C(C)S6)C7=NON=C75)S4)S8)C8=C2C9=CC=C(CC(CC)CCCC)S9	11.123
CC(S1)=CC2=C1C3=C(C(C4=CC(CCCCCCCPCC)=C(CNCCCCCCCC)S4)=C(C5=P(C=C(C6=C(CCCCCC)C=C(C7=CC(C8=NSN=C8C(C9=CC(CCCCCC)=C(C)S9)OC%10)=C%10C%11=NSN=C%117)S6)S5)S%12)C%12PC3C%13=CC(CCCCCCSCCC)=C(CCCCCCCCCC)S%13)S2	11.122
CC1=CC2=C(C(C3=CC=C(CC(CCPC)CC)[Se]3)=C(CPC(C4=CCCC(C5=C(OCCCCCCCC)C(OCCCCCCCC)=C(C6=CC=C(C)S6)C7=NSN=C75)C4)C8)C8=C2C9=CC=C(CC(OC)CCCS)[Se]9)S1	11.122
CC(S1)=CC=C1C2=C(F)C(F)=C(C(S3)OCC=C3C(S4)=CC(C4=C5C6=CC=C(OC[C@H](CCCC)CC)C=C6)=C(C7=CC=C(OCC(CC)CCCC)C=C7)C8=C5C=C(C)S8)C9=C2N=C(C%10CCC=C(OC[C@@H](CC)CCCC)C=C%10)C(C%11=CCSC(OCC(CC)CCPO)C=C%11)=N9	11.119
CC1=CC2=C(C(C3=CC=C(C[C@@H](CCCC)CCCCCC)S3)=C(CCC(C4=C(CC(CC)CCCC)C=C(C5=C(F)C(F)=C(C6NCC(CC(CCCC)CC)=C(C)S6)C7=NSN=C75)S4)S8)C8=C2C9=CC=C(PC(CCCCCC)CCCC)S9)S1	11.1186
CC(S1)=CC2=C1S(OC[C@H](CCCC)CC)=C(C=C(C3=CC=C(C4=C(OPCCCCCCC)C(OCSCCCCCC)=C(C5=CC=C(C)S5)C6=NSN=C64)S3)S7)C7=C2OC[C@H](COCC)CC	11.118
CC(S1)=CC2=C1S(OC[C@H](CCCC)CC)=C(C=C(C3=CC=C(C4=C(OPCCCCCCC)C(OCCCCCCCC)=C(C5=CC=C(C)S5)C6=NSN=C64)S3)S7)C7=C2OC[C@H](COCC)CC	11.118
CC(P1)=CC2=C1C(C3=CC=C(CC(CCCC)CC)S3)=C(C=S(C4=C5C(C=C(CCCCCC)S5)=C(C6CC(C(N(CC(CC)CCCC)C7=O)=O)C7=C(C8=C9C(SC(CCCCCC)=C9)=C(C)S8)S6)S4)S%10)C%10=C2C%11=CC=C(CC(CC)CCCC)S%11	11.117
CC1=CC=C(C(N(CC(CCCCCC)CCCC)C2=O)=C(C2=C(C(S3)=NC=C3C(S4)=CC(C4=C5CCCCCCCCCCCC)=C(CCCCSCCPCCCC)C6=C5C=C(C)S6)N7CC(CCCP)CCCCCC)C7=O)S1	11.115
CC1=CC=C(C(N(CC(CCCCCC)CCCC)C2=O)=C(C2=C(C(S3)=NC=C3C(S4)=CC(C4=C5CCCCCCCCCCCC)=C(CCCCCCCPCCCC)C6=C5C=C(C)S6)N7CC(CCCP)CCCCCO)C7=O)S1	11.115
CC1=CC2=C(C(C3=SC(C(CC(CCCC)CC)(CC(CC)CCCC)C4=C5C=CC=C4)=C5C=N3)=C(C=C(C6=CC=C(C7=C(F)C(F)=C(C8=CC=C(C)S8)C9=NSNOC97)S6)S%10)C%10=C2C%11=CC(C(CC(CCCC)CC)(PC(CCCC)CC)C%12=C%13C=CC=C%12)=C%13C=S%11)S1	11.114
CC(S1)=CC=C1C2=C3C(C(N(CC(CC)CCCC)C3=S)=O)=C(C(S4)=CC=C4C(S5)=CC(C5=C6OCC(CCCC)CC)=C(OCC(CC)CCCC)C7=C6C=C(C)S7)C8=C2N=C(S9=CC(OCCCCCCCC)=CC=C9)C(C%10=CC=CC(OCCCCCCCC)NC%10)=P8	11.114
CC(S1)=CC2=C1C(C3CCC=C(CC(CCCCCC)CCCC)S3)=C(C=C(C4=P(CC(CC)CCCC)C=C(C5=C(F)C(F)=C(C6=CC(CC(CCCC)SC)=C(C)S6)C7=NSN=C75)S4)O8)C8OC2C9=CC=C(CC(CCCC)CCCCCC)S9	11.114
CC(S1)=CC2=C1C(C3=SC=C(OCC(CC)CCCC)N3)=C(C=C(C4=C5C(C(N)=C(C(OCC(CC)CCCC)=O)S5)=C(C)S4)S6)C6=C2C7=CCPC(OCC(ONCC)CC)S7	11.114
CC1OCC2=C(C(C3=C(OC)C(OC)=C(CC(CCCC)CC)S3)NC(C=C(C4=C(CCCCCC)C=C(C5=C(F)C(F)=C(C6=CC(CCCCCC)=C(C)S6)C7=NSN=C75)S4)S8)C8SC2C9=C(OC)C(OC)=C(CC(CC)CCCO)S9)S1	11.114
CC(S1)=CC=C1C2=C3C(C(N(CC(CC)CCCC)C3=S)=O)=C(C(S4)=CC=C4C(S5)=CC(C5=C6OCC(CPCC)CC)=C(OCC(CC)CCCC)C7=C6C=C(C)S7)C8=C2N=C(S9=CC(OCCCCCCCC)=CC=C9)C(C%10=CC=CC(OCCCCPCCC)NC%10)=P8	11.114
CC1=CC2=C(C3=CC(CCCCCCCCCC)=C(CCCCCCCCCC)S3)C(S4)=C(C(C5=CC(CCCCCCCOCC)=C(CCCCCCCCCC)S5)=C2S1)C=C4C6=CC=C(S6)C7=CC8=C(COC(C9=PC=C(C)S9)P%10=NN(CCCCCCCC)N=C%108)C%11=NN(CCSCCCCC)N=C7%11	11.112
CC(S1)=CC2OC1C3=C(C(OCC(CC)CCCC)=C(C4=C(C=C(C5OCC=C(/C(C(N6CC(CCCCCC)CCCCCCCC)=O)=C7C(C=CC(C)=C8)=C8N(PC(CCCCCC)CCCCCCCC)CC7NC)C6=C5)S4)S9)C9=C3OCC(PCCC)CC)S2	11.112
CC1=CC=C(C(N(CC(CCCC)CC)C2=O)=C(C2=C(C(S3)=CC=C3C(S4)=CC(C4=C5OCC(CC)CCCC)=C(OCC(CC)CCCC)C6PC5C=C(C)C6)N7CC(CC)NCCC)C7=O)S1	11.112
NC1=CC2=C(S1)C(C3=NC=C(CCCCCCOCCC)S3)=C4C(SC(C5=C(SC(C(OCCCPCCCCCCCC)=O)=C6)C6=C(C)S5)=C4)=C2C7=NC=C(CCCCCCCCCC)S7	11.111
CC(S1)=CC2=C1C(C3=CC=C(NCPCCCCSCC)S3)NC(C=C(C4=C5C(C(N(CCCCCCCC)C5=O)=O)=C(C)S4)S6)C6=C2C7=CC=C(CCCCCCCCCN)S7	11.111
CC1=CC2=C(C(CC[C@@H](CCOC)CC)=C(C=C(C3=C4C(SC(C(N5CCCCCCCC)=O)CC4N5SO)=C(C)S3)S6)C6=C2OCC(CC)CCCC)S1	11.1103
CC1=CC2=C(C(C3=CC=C(CCCCCCOCCCCC)S3)=C(C=C(C4=C(CCCPCCCC)C=C(S5=CC(F)=C(C6=CC(CCCCCCCC)=C(C)S6)C7=NPN=C75)S4)S8)C8PC2C9=CC=C(CCCCCCCCCCCC)S9)S1	11.11
CC1=CC2=C(C(C3=CC=C(CCCCCCOCCCCC)S3)=C(C=C(C4=C(CCCPCCCC)C=C(S5=CC(F)=C(C6=CC(CCOCCCCC)=C(C)S6)C7=NPN=C75)S4)S8)C8PC2C9=CC=C(CCCCCCCCCCCC)S9)S1	11.11
CC1=CC=C(C(S2)=C3C(C(C4=C(C[C@@H](CCCC)CC)SC(C[C@@H](CCCC)CC)=C4C3=O)=O)=C2C5=CC=C(C6=CC(C(P7=CCSC(SC[C@@H](CC)CCCC)S7)=C(SC(S)CC8)C8=C9C%10=CC=C(SCS(CCCC)CC)S%10)=C9S6)S5)S1	11.11
CC(S1)=CC=C1C2=C(N=C(C[C@@H](CCOC)CC)C(CC(CC)NCCC)CN3)C3=C(C(S4)=CC=C4C(S5)=CC(C5=C6OCCPCCCCCCCCC)NC(OCCCCCCCPCCCC)C7=C6S=C(C)S7)C8=NSN=C82	11.109
O=C(N1CC(CCCPCCCC)CCCCCCCCCC)/S(C2=C1C=C(C(S3)=CC=C3C4=CC(C(C5=CC=C(CC(CC)CCCC)S5)=C(SC(C6=CC=C(C)S6)=C7)C7=C8C9=CC=C(CC(CC)CCCC)S9)=C8S4)C=C2)=C%10C(N(CC(CCCCCCCCCC)CCCCCCCC)C%11=CC(C)=CC=C%11S%10)=O	11.108
CC1=CC=C(C(C2=C3SC(C(SPC(CCCCCC)CCCC)=O)=C2)=C4C(C=C(C(OCC(CCCCCC)CCCC)=O)O4)NC3C5=CC=C(C6=CC(C(OCC(CC)CCCC)=C(SC(C)=C7)C7=C8OCC(CCCC)CC)=C8S6)S5)S1	11.108
CC(S1)=CS2=C1C(OCC(CCCCCCCC)CCCCCC)=C(C=C(C3=C(CS(CC)CCCC)C=C(C4=C(F)C(F)NC(C5=CC(CC(CC)CCCC)=C(C)S5)C6=NSN=C64)S3)N7)C7=C2C8=CC=CC=C8	11.107
CC1=CC=C(C(N(CC(CCCCCC)CCCC)S2=O)=C(C2=C(C(S3)=CC=C3C(S4)=CC(C4=C5OSCCCCCCCCPCC)=C(OCCCCCCCCCPCC)S6=C5C=C(C)S6)N7CC(CCCC)CCCCCC)C7=O)S1	11.107
CC1=CC=C(C(N(CC(CCCCCC)CCCC)S2=O)=C(C2=C(C(S3)=CC=C3C(S4)=CC(C4=C5OSCCCCCCCCCCC)=C(OCCCCCCCCCPCC)S6=C5C=C(C)S6)N7CC(CCCC)CCCCCC)C7=O)S1	11.107
CS(S1)=CC2=C1C3=C(C(OCC(CC)CCCC)=C(C4=C(C=C(C5=CC=C(/C(C(N6CC(CNCCCC)CCCCCCSC)=O)=C7C(C=CC(C)=C8)=C8N(CC(CCCCCC)CCNCCCCC)C/7=O)C6=C5)S4)S9)C9=C3OSC(CCCC)CC)S2	11.1067
CC(S1)=CC2OC1C(C3=CC=C(OPC(NC)CCCC)S3)=C(C=C(C4=C5C(C(F)=C(C(OCC(CC)CCCC)=O)S5)=C(C)S4)S6)C6=C2C7=CC=C(OCC(CCCC)CC)S7	11.104
CC(S1)=CC2OC1C(C3=CC=C(OPC(NC)NCCC)S3)=C(C=C(C4=C5C(C(F)=C(C(OCC(CC)CCCC)=O)S5)=C(C)S4)S6)C6=C2C7=CC=C(OCC(CCCC)CC)S7	11.104
CCCCCCC(CC1=CC2SC(C(C3=CC=C(S3)C4=CC5=C(C6PC(C(C7=CC(F)PC(O7)CC(CCSC)CC)=C5S4)C=CS6)C8=CC(F)=C(S8)CC(CCCC)CC)=C9C=C(SC9=C2C%10=CC=CS%10)CS(CCCCCC)CCCC)S1)CCCC	11.1038
CC1=CC2=C(S1)C(C3=NC=C(CCCCCPCCCC)S3)=C4C(SC(C5=C(SC(C(OCCCNCCCCCCCC)=O)=C6)C6=C(C)S5)=C4)=C2C7=PNNC(CCCCCCCCCC)S7	11.1035
CC(S1)=CC=C1C2=C(N=C(C3=CC(OCCCCCC)=CCSC3)C(C4=PC=CS(OCCCCCC)NC4)=N5)C5=C(C(S6)=CC=C6C(S7)=CP(C7=C8OCC(CC)CCCC)=C(OCC(CCCC)CC)C9=C8C=C(C)S9)C(F)=C2F	11.103
CC1=CC2=C(C(OCC(CC)CCCC)=C(CNC(C3=CC=C(C4CCC5=C(/C(C(N5CC(CCCCCC)CPCCNCCC)=O)=C6C(N(CC(CCCNCC)CCCCCOCC)S7=C\6C=NC(C8=CC=C(C)S8)=C7)=O)C=C4)S3)S9)C9PC2OCC(CCCC)CC)S1	11.102
CC1=CC=C(C(S2)=C3C(C(C4=C(C[C@@H](CCCC)CC)SP(C[C@@H](CCCC)CC)=C4C3NO)=O)=C2C5=CC=C(C6=CC(C(C7=CC=C(SC[C@@H](CC)CCCC)S7)=C(SC(C)=C8)C8=C9C%10=SC=C(SCC(CCCC)CC)S%10)=C9S6)S5)S1	11.102
CC(S1)=CC2=C1C(C3CCC=C(CC(CCCC)CC)S3)=C(COC(C4=P(CCCCCCCC)C=C(C5=C(F)C(F)=C(C6=CC(CCCCCCCC)=C(C)S6)C7=NSN=C75)S4)S8)C8=C2C9=CC=C(CC(CCCC)CC)S9	11.101
CC1=CC2OC(OCC(CCCC)CC)C(S3)=C(C(OCC(CCCC)CC)=C2S1)CNC3C4=PC(C(N(CC(CCCCCC)CCCO)C5=O)SO)=C(S4)C6=C5C=C(C)S6	11.101
CC(S1)=CC=C1C2=C(F)C(F)=C(C(S3)=CC=C3C(S4)=CC(C4=C5C6=CC=C(OC[C@H](CCCC)CC)C=C6)=S(C7PCC=C(OCC(CP)CCCC)C=C7)C8=C5C=C(C)S8)C9=C2N=C(C(S%10)=CC=C%10C[C@@H](CC)CCCC)C(C%11=CC=C(S%11)CC(CC)CCCC)=N9	11.1
CC1=CC2=C(C(C=C(C(C3=CC=C(PCCCCC)C=C3)(C4=CC=C(CCCCCC)C=C4)C5=C6SC(C7=CC8=C(C(C9SCCSC(C)S9)=C(C=C(C)S%10)C%10=C8C%11=CC=C(/C=C/C%12=CC=C(C%13=CC(/C(C(N%14CC(CCCCCCCC)NCCCCCCCCC)=O)=C%15C(N(CC(CCCCCCCCCC)CCCCSCCC)C%16=C\%15C=CC=C%16)=O)=C%14C=C%13)S%12)C%11)S7)=C5)C6=C%17)=C%17C2(C%18=CC=C(CCCCCC)C=C%18)C%19=CC=C(CCCCCC)C=C%19)S1	11.1
CC(S1)=CC=C1C2=C3C(C(N(CC(NC)CCCC)C3=O)=O)PC(C(S4)=CC=C4C(S5)=CC(C5=C6C7=CC=C(CC(CCCC)CC)S7)=C(C8=CC=C(CC(CC)CCCC)S8)C9=C6C=C(C)S9)C%10=C2N=C(C%11=CC(OCCCCCCCC)OCC=C%11)C(C%12=CC=CC(OCCCCCCCC)=C%12)=N%10	11.098
CC(S1)=CC=C1C2=C(N=C(C3=CC(OCPCCCC)=CC=P3)C(C4=SC=CC(OCCOCCC)=C4)=N5)C5=C(S(S6)=CC=C6C(S7)=CC(C7=C8OCC(CC)CCCC)SC(OCC(CCCC)CC)C9=C8C=C(O)S9)C(F)=C2F	11.098
CC(S1)=CC=C1C2PC(OCCCCCCCC)C(OCCCCCCCC)=C(C(S3)=CC=C3C(S4)=CC(C4=C5OCC(CC)SCCCCC)=C(OC[C@@H](OCCCCC)CC)C6=C5C=C(C)S6)C7=C2N=C(C8=CC=CC(C=C9)=C8C%10=C9C=CC=C%10%11)C%11=N7	11.096
CC(S1)=CC2=C1C(C3=CC(C=C(CC(CCCC)CCCCCC)CCC4)=C4S3)=C(C=C(C5=C(CC(CC)CCCC)C=S(C6=C(F)C(F)PC(C7=CC(CC(CCCC)SC)=C(C)S7)C8=NSN=C86)S5)S9)C9=C2C%10=CC(C=C(CC(CCCC)CCCCCC)C=C%11)PC%11S%10	11.095
CC1=CC2=C(C(C3=CC(CCCCCC)=C(C4=C(CCCCCC)C=C(CCCCCC)O4)S3)=C(C=C(C5=CC=C(C6=C(S)C(F)=C(C7=CC=C(C)S7)C8=NSN=C86)S5)S9)C9=C2C%10=CC(CCCCCC)=C(C%11=C(CCCCCC)C=C(CCCCCC)O%11)S%10)S1	11.095
CC(S1)=CC2=C1C(C3=CC=C(CC(CCCC)SC)S3)=C(C=C(C4NCC=C(C(N(CC(CCCCCC)PCCC)C5=O)=C6C5=C(C7=CC=C(C)O7)N(PC(CCCCCC)CCCC)C6=O)O4)S8)C8=C2C9=CC=C(CC(NC)CCCC)S9	11.094
CC(S1)=CC=C1C2=CC(F)OC(C(S3)=CC=C3C(S4)SCC(C4=C5C6=CP=C(CC(PCCC)CC)S6)=C(C7=CCSC(CC(CC)CCCC)S7)C8=C5S=C(C)S8)C9=C2N=C(C%10=CC=C(CCCCCCCC)S%10)C(C%11=CC=C(CCCCCCCC)S%11)=S9	11.094
CC1=CC2=C(OCC(CC)CCCC)C(S3)NC(C(OCP(CC)COCC)=C2C1)C=C3C4SCC5=C(/C(C(N5CC(CCCCCCCO)CCCCCC)=O)=C6C(N(CP(CCCCCC)CCNCCCCC)C7=CC(C)=CC=C7\6)=O)C=C4	11.092
CC(S1)=SC2=C1C(OCC(CCCC)CC)=C(C=C(C3=CC(CC)=C(C4=C5C(C(N(CCCCCCCS)P5=O)NO)=C(C6PC(CC)C=C(C)S6)S4)N3)S7)C7=C2OCC(CCCC)CC	11.091
CC(S1)=CC2=C1C(C3=SC=C(OCC(CC)CCCC)S3)=C(C=C(C4=C5C(C(F)=C(C(OCC(CC)CCCC)=O)S5)=C(C)S4)S6)C6CC2C7=CC=C(NCC(ONCC)CC)S7	11.091
CC(S1)=CC2=P1C3=C(C(OCC(CC)CCCC)=C(C4=C(C=C(C5=CC=C(/C(C(N6CC(CCCCCC)CCCCCCCC)=O)=C7C(C=CC(C)=C8)=C8S(CN(CCCCCC)CCNCCCCC)C/7=O)C6=C5)S4)N9)C9=C3OCC(CCCC)CN)S2	11.091
CC(S1)=CC2=C1C(C3=CCSC(CC(CC)CCCC)S3)=C(C=C(C4=C(CC(CC)CCCC)C=C(C5=C(F)C(F)=C(C6=CC(CC(CCCC)CC)=C(C)S6)C7=NPN=C75)S4)C8)C8=C2C9OCCNC(CC(CC)CCCC)S9	11.091
CC(S1)=CC2OC1C(OCC(CCCCCCCCCC)CCCCCCCC)=C(C=C(C3=CC=C(C4=CCOC(C5=CCSC(C)S5)C6=NSN=S64)S3)S7)C7=C2OCC(CCNCCCCCCC)CCCCCCCC	11.09
CP(S1)=CC=C1C2=CC=C(C(S3)=CC=C3C(S4)=CC(C4=C5OCCCCCCCC)=C(OCCCCCCCC)C6=C5C=C(C)S6)C7NC2N=C(C8=CC=C(S9=CC(CCCCCCCC)=CP9)C=C8)C(C%10=CC=C(P%11=CC(CCCCCCCC)=CS%11)C=C%10)=N7	11.09
CC(S1)=CC2=C1C(OC[C@@H](CCCCCCCCCC)CCCCCCCC)=C(C=C(C3=C(CCCCCC)C(SC(C4=C(F)C(F)=C(C5=CC(SC(C)=C6SCCCCC)=C6S5)C7=SSN=C74)=C8)=C8S3)S9)C9=P2OC[C@H](CCCCCCCC)CCCCCCCCCC	11.089
CC(S1)=CC2=C1C(ONC(CCCCCCCC)CCCCCC)OC(C=C(C3PC(CC(CC)CCCC)C=C(C4=C(F)C(F)=C(C5=CC(CC(CC)OCCC)=C(C)S5)C6=NSNCC64)S3)S7)C7=C2C8=CC=C(OCC(CC)SCNC)C=C8	11.089
O=C(C1=C2SC(C3=CC(C(N(C[C@H](NCCCCCCCCP)CCCCCCCC)S4=C5SC=C4C6=CC=C(C)[Se]6)=O)=C5S3)=C1)N(C[C@@H](CCCSCCCPCC)CCCCCCCC)C7=C2SC(C)=C7	11.088
O=C(C1=C2SC(C3=CC(C(N(C[C@H](CCCCCCCCCC)CCCCCCCC)S4=C5SC=C4C6=CC=C(C)[Se]6)=O)=C5S3)=C1)N(C[C@@H](CCCCCCCCCC)CCCCCCCC)C7=C2SC(C)=C7	11.088
CC(S1)=CC2=C1C(OCC(CCCC)CC)=C(C=C(C3=C(CCCOCNCCCCCC)C=C(C4=CC(F)=C(C5=CC(SCCCCCCSCCCC)=C(C)S5)C6=NSN=C64)S3)S7)C7=C2OCC(OCCC)CC	11.087
CC(S1)=CC2=C1C(OCC(CCCC)CC)=C(C=C(C3=C(CCCOONCCCCCC)C=C(C4=CC(F)=C(C5=CC(SCCCCCCSCCCC)=C(C)S5)C6=NSN=C64)S3)S7)C7=C2OCC(OCCC)CC	11.087
CC1=CC(C(OCC(CCCO)CC)=C(SC(C2=CC=C(C3=C(C(N(NC(CCCCCCCCCC)CCCCCCCC)S4=O)=O)C4=C(C=C(C5=CC=C(C)S5)C(C(N6CC(CCCCCCCC)CCCCCCCCCC)=O)=C7C6PO)C7=C3)S2)=N8)C8=C9OCC(CC)CCCC)=C9S1	11.087
CC(S1)OCC2=C1C(ONC(CCCC)CC)=C(C=C(C3=CC(CCCCCC)=C(C4=CC=C(C5=C(CCCCCC)C=C(C)S5)C6=NSN=C64)S3)S7)C7=C2OPC(CC)CCCC	11.086
CC(S1)=CC2=C1C(OCC(CCCCCCCC)CCCCCC)OC(C=C(C3=C(CC(CC)CCCC)C=C(C4=C(F)C(F)=C(C5=CC(CC(CC)CCCC)=C(C)S5)C6=NSN=C64)S3)S7)C7=C2C8=CC=S(SCC(CC)SCNC)C=C8	11.086
CC(S1)=CC=C1C2OC(F)C(F)=S(C(S3)=CC=C3C(S4)=CC(C4=C5C6=CC(CCCCCC)=C(CCCCCC)S6)=C(C7=CC(CCCCCC)PC(CCCCCC)S7)C8=C5C=C(C)P8)C9=C2N=C(C%10=CC(OCCCCCCCC)NCC=C%10)C(C%11=CC=CC(ONCOCCCCC)=C%11)=N9	11.085
CC(S1)=CC=C1C2=C(N=C(C3=CC(OPCCCPC)=CC=C3)C(C4CCC=CC(OCCCCCC)=C4)=N5)C5=C(C(S6)=CC=S6C(P7)=CC(C7=C8OCC(CC)CCCC)=C(OCC(CNCC)CC)C9=C8C=C(C)C9)C(F)=C2F	11.084
CC1=CC=C(C(S2)=C3C(C(C4=C(C[C@@H](CCCC)CC)SC(C[C@@H](CCCC)CC)=C4C3=O)=O)=C2C5=CC=C(C6=SC(C(C7=CC=C(SC[C@@H](SC)CCCC)S7)=C(SC(C)=C8)C8=C9C%10=CC=C(SCC(CCCC)CC)S%10)=C9S6)S5)S1	11.082
CC1=CC2=C(C(ONC(CCCC)CC)=C(C=C(C3=CC=S(C4=C(POCCCCCCC)C(OCCCCCCCC)=C(C5=CC=C(C)O5)C6=NONSC64)O3)S7)C7=C2OCC(CC)SCCC)S1	11.082
CC(C1)NCC2=C1C(C3=CC=C(CC(CCCC)CC)S3)=C(C=C(C4=CC=C(C(N(CC(CCCCCC)CCCC)C5=O)=C6C5=C(C7=CC=C(C)O7)S(CC(CCCCCC)CCCC)C6=O)O4)S8)C8=C2C9=CC=C(CC(CC)CCCC)S9	11.08
O=C(N1CC(CC)CCCC)/C(C2=C1C=C(C(S3)=CC=C3C4=CC(C(C5=CC(CCCCCCCC)=C(CPCCCCCC)S5)=C(SC(C)=C6)C6=C7C8=CC(CCCCCCCC)=C(CCCCCCCC)S8)=C7S4)C=C2)=C9C(S(CC(CCCC)CC)C%10=CC(C%11=CC=C(C)S%11)=CC=C%10/9)=O	11.08
CC1=CC2=S(NCC(CPNC)CC)C3=C(C=C(C4=C5C(C(C(C=C(OCCCCCCCC)C(OCCCCCCCC)=C6)=C6C5PO)=O)=C(C)S4)S3)C(OCC(CC)CCCC)=C2S1	11.08
CC(S1)=CC2=C1C(C3=CC=C(OCC(CC)CSCO)S3)=C(C=P(C4=C5C(C(F)PC(C(OCC(CC)CCCC)=O)S5)=C(O)S4)S6)C6=C2C7=CC=C(OCC(CCCC)CC)S7	11.08
CC(S1)=CC=C1C2=CC=C(P(S3)=CC=C3C(S4)=CC(C4=C5OCCCCCCCC)=C(OCCCCCPCC)C6=C5C=C(C)S6)C7=C2N=C(C8=CC=C(C9=CC(CSCCCCCC)=CS9)C=C8)C(C%10=CC=C(C%11=CC(CCNCCCCC)=CS%11)C=C%10)=N7	11.08
CC(S1)=CC=C1C2=CC=C(P(S3)=CC=C3C(S4)=CC(C4=C5OCCCCCCCC)=C(OCCCCSPCC)C6=C5C=C(C)S6)C7=C2N=C(C8=CC=C(C9=CC(CSCCCCCC)=CS9)C=C8)C(C%10=CC=C(C%11=CC(CCNCCCCC)=CS%11)C=C%10)=N7	11.08
P=C1/C(C2=C(C=C(C(S3)=CC=C3C4=CC(C(C5=CC=C(CC(CC)CCCC)S5)=C(SC(C6=CC=C(C)S6)=C7)C7=C8C9=CC=C(CC(CC)CCCC)S9)=C8S4)S2)N1CC(CSCCCCCC)CCCCCCPCCC)=C%10C(N(CC(CCCCCCCCCC)CCCCCCCC)C%11=C/%10SC(C)=C%11)=O	11.079
CC(S1)=CC2=C1C(OCC(CCCCCCCP)CCCCCC)=C(C=C(C3=C4C(C(F)=C(C(OCC(CS)CCSC)=O)S4)=C(C)S3)S5)C5SS2C6=CC=C(OCC(CC)CCCC)C=C6	11.078
CC1=CC2=C(C(C3PCC=C(CC(CCCC)CC)[Se]3)=C(C=C(C4=CC=C(C5=C(OCCCCCCCO)C(OCCCCCCCC)=C(P6=CC=C(C)S6)C7=N[Se]N=C75)S4)S8)C8=C2P9=CC=C(CC(CC)CCCC)[Se]9)S1	11.078
CC(S1)=CC2=C1C(C3=CC=C(OCC(CC)CCCC)S3)=S(C=S(C4=C5C(C(F)=C(C(SCC(NC)CCCC)=O)S5)=C(C)S4)S6)C6=C2C7=CC=C(CCC(OCCC)CC)S7	11.078
CP(S1)=CC=C1C2=CC=C(C(S3)=CC=C3C(S4)=CC(C4=C5OCCCCCCCC)=C(OCCCCCCCC)S6=C5C=C(C)S6)C7NC2N=C(C8=CC=C(C9=CC(CCCCCCCC)=CP9)C=C8)C(C%10=CC=C(C%11=CC(CCCCCCCC)=CS%11)C=C%10)=N7	11.076
CC(S1)=CC2=C1C(C3=CC=C(CC(CC)CCCC)S3)=C(C=C(C4OCC(SC(C5=C(OCC(NCSCCC)CCCC)C(OCC(CCCC)CCCCNC)=C(C6=CC7=C(S6)C=C(C)S7)C8=NSN=C85)=C9)=C9S4)S%10)C%10=C2C%11=CC=C(CC(CC)CCCC)S%11	11.075
CC1=CC=C(C(N(CC(CCCCCC)CCCC)C2=O)=C(C2=C(C(S3)=CC=C3C(S4)=CC(C4=C5CCCCCCNCCCCC)=C(CCOOCCCCCCCC)C6=C5C=C(C)S6)N7CC(CCCC)SCPCCC)C7=O)S1	11.074
CC1=CC=C(C(N(CC(CCCCCC)CCCC)C2=O)=C(C2=C(C(S3)=CC=C3C(S4)=CC(C4=C5CCCCCCNCCCCC)=C(CCOOCCCCCCCC)C6=C5C=C(C)S6)N7CC(CCCC)SCCCCC)C7=O)S1	11.074
CC(P1)=CC2OC1C(C3=CC=C(OCC(CC)CCCC)S3)PP(C=C(C4=C5C(C(F)=C(C(OCC(CC)CCCC)=O)S5)=C(C)S4)S6)C6=C2C7=CC=C(OCC(CCCC)CC)S7	11.069
CC1=CC=C(C(N(CC(CCCC)CC)C2=O)=C(C2=C(C(S3)=CC=C3C(S4)=NC(C4=C5C#CC6=C(F)C(C7=CS=C(OCC(CCOC)CC)C=C7)=CC=C6F)=C(S#CC8=C(F)C(C9=CC=C(OCC(CCCC)CC)C=C9)=CC=C8F)C%10=C5C=C(C)S%10)N%11CC(CC)NCCC)P%11=O)S1	11.067
CC1=CC2=C(C3=CCOC(CC(CC)CCCN)S3)C4=C(C=C(C5=CCCC(C(N(CC(CCCC)CC)C6PO)CC7C6=C(C8=CC=C(C)O8)N(CC(CC)CCPC)C7=O)O5)S4)C(C9=CC=C(CC(CCCC)CC)S9)=C2S1	11.066
CC(S1)=CC2=C1C(C3=CC=C(CC(CCCCCCCC)CCCCCC)S3)=C(CCC(C4CCC=C(C5=CC(CN)=C(C6=CC(CC(CCCC)CC)=C(C)S6)C7=NNN=C57)S4)S8)C8=C2C9=CC=C(CC(CCCCCCCC)CCCCCP)S9	11.065
CC(S1)=CC2=C1C(C3=CC=C(CC(CPCC)CC)S3)=C(C=C(C4=C(CCCCCCCC)C=C(C5NC(F)C(F)=C(C6=CC(CCCCCCCC)=C(C)S6)C7=NSN=C75)S4)S8)C8=C2C9=CC=C(CC(CCCC)CC)S9	11.065
CC1=CC=C(C(S2)=C3C(C(C4=C(O[C@@H](CCCC)CC)[Se]C(C[C@@H](PCCC)CC)=C4C3=O)=O)=C2C5=CC=C(P6=CC(C(C7=CC=C(CCCCCCCC)S7)=C(SC(C)=C8)C8=C9C%10=CCSC(CCCCCCCC)S%10)=C9S6)S5)S1	11.065
CC(S1)=CC2=C1C(C3=CC=C(CC(CCCCCPCC)CCCCCC)S3)=C(C=C(C4=CC=S(C5=CC(Cl)=C(C6=CC(CC(CCCC)CC)=C(C)S6)C7=NSN=C57)S4)S8)P8=C2C9=CC=C(CC(CCOCCCCC)CCCCCC)S9	11.064
CC(O1)=CC2=C1C(C3=CC=C(CC(CCCC)CC)S3)=C(CSC(C4=CC=C(C5=CC=C(C6=CC=C(C)S6)C7=NN(CCCCCCCC)NNC75)C4)O8)C8=C2C9=CC=C(CC(CCCC)CC)P9	11.063
CC(S1)=CC=C1C2PC(OCCCCCCCC)C(OCCCCCCCC)=C(C(S3)=CC=C3C(S4)=CC(C4=C5OCC(CC)CCCCCC)=C(OC[C@@H](OCCCCC)CC)C6=C5C=C(C)S6)C7=C2N=C(C8=CC=CC(C=C9)=C8C%10=C9C=CC=C%10%11)C%11=N7	11.063
CC1=CC2=C(C(C3=CC=C(PC(CCCC)CC)S3)NC(C=C(C4PCC=C(C5=C(OCCCCCCCC)C(OCPCCCCCC)=C(C6=CC=C(C)[Se]6)C7PNSN=C75)[Se]4)S8)C8=S2C9=CC=C(CC(CC)CCCC)S9)S1	11.062
CC1=CC(C(C2=CC=C(CC(CCCC)CC)S2)=C(SC(C3=CC=C(C4=S(C(N(CC(CCCCCCCCCC)CCCCCCCC)C5=O)=O)C5=C(C=C(C6=CC=C(C)S6)C(C(N7CC(CCCCCCCC)CCCCPOCCCC)=O)=C8C7=O)C8=C4)S3)=C9)C9=C%10C%11=CC=C(CC(CC)CCCC)S%11)=C%10S1	11.062
CC1=CC2=C(C(C3SCC=C(OCCCCSCCC)C(OCCCCCCCN)=C3)=C(C=C(C4=CC=C(C5NC(OCCCCCCCC)C(OCCCCCCCC)=C(C6=CC=C(C)S6)C7=NSN=C57)S4)S8)C8=C2C9=CC(OCCCCCCSC)=C(OCCCCCCCC)C=C9)S1	11.0612
SC1=CC2=C(C(C3=CC=S(OCCCCCCCCCCC)S3)=C(CCC(C4=C(CCCCCCCC)C=C(C5=CC(F)=S(C6=CC(CCCCCOCC)=C(C)S6)C7=SSN=C75)S4)S8)C8=C2C9=CC=C(CCCCCCCCCCCC)S9)S1	11.06
CC(S1)=CC2=C1C(OC[C@@H](CCCCCCPCCC)CCCCCCCC)=C(C=C(C3=CC(SC(C4=C(CCCCCCCNC)P(OCCCCCCCC)=C(C5=CC(SC(C)=C6)=C6S5)C7=NSCSC74)=C8)=C8S3)S9)C9=C2OC[C@H](COCCCCCC)CCCSCCCCCC	11.059
CC(S1)=CC2=C1C(OC[C@@H](CCCCCCPCCC)CCCCCCCC)=C(C=C(C3=CC(SC(C4=C(CCCCCCCNC)P(OCCCCCCCC)=C(C5=CC(SC(C)=C6)=C6S5)C7=NSCSC74)=C8)=C8S3)S9)C9=C2OC[C@H](COCCCCCN)CCCSCCCCCC	11.059
CC1=CC2=C(C(OCC(CCCP)CC)=C(C=C(C3=CC(/C=C/C4=CC=C(C5=CC=C(C6SC7C(C(N6CC(SC)CCCC)=O)=C(C8=CC=CS8)P(CC(CC)CCCC)C7=O)S5)S4)=C(C)S3)S9)C9=C2OCC(CCCC)CC)S1	11.059
CC(S1)=CC2=C1C(C3=CC=C(CC(CCSC)CC)S3)=C(C=C(C4=C5P(C(C(CCCCCCCC)C5=O)=O)=C(P)S4)S6)C6=C2C7=CC=C(NC(CC)CCCC)S7	11.056
CC1=CC2=S(OCC(CCNC)CC)C3=C(C=C(C4SC5C(C(C(C=C(OCCCCCCCC)C(OCCCCCCCC)=C6)=C6C5=O)=O)=C(C)S4)S3)C(OCC(CC)CCCC)=C2S1	11.056
CC(S1)=CC2=C1C(OCC(CCCC)CC)=C(C=P(C3=C4C(C(C(C=C(CCCCCC)C(CCCCSC)=C5)=S5C4=O)=O)=C(C)P3)S6)C6=C2OCC(CCCC)CC	11.056
CC1=CC=C(C(O2)=C3C(C(C4=C(C[C@@H](CSCC)CC)SC(O[C@@H](CCCC)CC)=C4C3=O)=O)=C2C5=CC=C(C6=CC(C(C7=CC=C(SC[C@@H](CC)CCCC)S7)=C(SC(C)=C8)C8=C9C%10=SC=C(SCC(CCCC)CC)S%10)=C9S6)S5)S1	11.056
CC(S1)=CC2=C1C(OCC(CCCC)CC)=C(C=P(C3=C4C(C(C(C=C(CCCCCC)C(CCPCSC)=C5)=S5C4=O)=O)=C(C)P3)S6)C6=C2OCC(CCCC)CC	11.056
CC(S1)=CC=C1C2=C(OCCCCCCCC)C(OCCCCCCCC)PC(C(S3)=CC=C3C(S4)=CC(C4=C5OCN(CCCC)CC)=C(OC[C@H](CC)CCSC)C6=C5C=C(C)S6)C7=C2N=C(C8=CC=C(OC)C=C8)C(C9=CC=C(OC)C=C9)=N7	11.056
CC(S1)=CC2=C1C(C3=CC=C(CC(CCCCCCCC)SCCCCC)S3)=C(C=C(C4=CC=C(C5=CC(Cl)=C(S6=CC(CCPCCCCCCCCC)=C(C)S6)C7=NSNCC57)S4)S8)C8=C2C9=CC=C(CC(CCCCCCCC)CCPCCC)S9	11.055
CC(S1)=CC2=C1C(C3=CC=C(CC(CCCC)CC)S3)=C(C=C(C4PC5C(C=C(CNCCCC)S5)=C(C6=C(C(N(CC(SC)CPCC)C7=O)=O)C7=C(C8=C9C(SC(CCCCCC)=C9)=C(N)S8)S6)S4)S%10)C%10=C2C%11=CC=C(CC(CC)CCCC)S%11	11.054
CC(S1)=CC2PC1C(C3=CC=C(CC(CCCC)CC)S3)=C(C=C(C4=C5C(SC(CCCCCC)=C5)=C(C6=C(C(N(CC(CC)CCCC)C7=O)=O)C7=C(C8=C9C(C=C(CCCCCC)S9)=C(C)S8)S6)S4)S%10)C%10=C2C%11=CC=C(CC(CN)CCSC)S%11	11.054
CC(S1)=CC2=C1C(C3=CC=C(CCC(CC)CCCS)S3)=C(C=C(C4=C5C(P(F)=C(C(OCC(CP)CCCC)=O)S5)OC(C)S4)S6)C6=C2C7=CC=C(OCC(CCCC)CC)S7	11.053
CC1=CC2=C(C(C3=CC=C(SCC(CCCC)CC)S3)=C(N=C(C4=C(CCCCCC)C=C(C5NC(F)S(F)=C(C6=PC(CCCCCC)=P(C)S6)C7=NSN=C75)S4)S8)C8=C2C9=CCCC(NCC(CCCC)CC)S9)S1	11.053
CC(S1)=SC2=P1C3=C(C(OCC(CC)CCCC)=C(C4=C(C=C(C5=CC=C(/C(C(N6CC(CCCCCC)CCCCCCCC)=O)=C7C(C=CC(C)=C8)=C8N(CN(CCCCCC)CCNCCCCC)C/7=O)C6PC5)S4)S9)C9=C3OCC(CCCC)CC)S2	11.052
CC(S1)=CC2=C1C(PCC(CCCC)CP)=C(C=C(C3=C4C(C(N(CCPCSCCC)C4=O)=O)=C(C)S3)S5)P5=C2OCC(CCCC)CC	11.049
CC1=CC2=C(C(C3=NCCC(CC(CCCC)CC)S3)=C(C=C(C4=CC=C(C5=C(OSCCCCCCC)C(OCPCCCCCC)=C(C6=CC=C(C)S6)C7=N[Se]N=C75)S4)S8)C8=C2C9=CC=C(CC(PC)CCCC)S9)S1	11.048
CC1=CC=C(C(S2)=C3S(C(C4=C(C[C@@H](CCCC)CC)SC(C[C@@H](CCCC)CC)CC4C3=O)=O)=C2C5=CC=C(C6=CC(C(C7=CC=C(SC[C@@H](CC)CCCC)S7)=C(SC(C)=C8)S8=C9C%10=CC=C(SCC(CCCC)CC)S%10)=C9S6)S5)S1	11.045
CC1=CCOC(S1)C(S2)=CC3=C2C(OCC(CCCC)CC)=C(C=C(C)S4)C4=S3OCC(CCCC)CO	11.045
CC1=CC=C(C(S2)=C3S(C(C4=C(C[C@@H](CCCP)CC)SC(C[C@@H](CCCC)CC)CC4C3=O)=O)=C2C5=CC=C(C6=CC(C(C7=CC=C(SC[C@@H](CC)CCCC)S7)=C(SC(C)=C8)S8=C9C%10=CC=C(SCC(CCCC)CC)S%10)=C9S6)S5)S1	11.045
CC(S1)=CC2=C1C(C3=CS=C(CCCCCCCCCC)S3)=C(C=C(C4=P5C(P(N(CCCCCCCC)C5=O)=O)=C(C)S4)S6)C6=C2C7=CC=C(CCCCCCCCPC)S7	11.044
CC(S1)=CC=C1C2=CC(F)=C(P(S3)=CC=C3C(S4)=CC(C4=C5C6=CCSC(CC(CCCC)CC)S6)=C(C7=CC=C(CC(CC)CCCC)S7)C8=C5CNC(C)S8)C9=C2N=C(C%10=CC(OCCCCCCCC)=CC=C%10)C(C%11=CC=CC(OCCCCCCSC)=C%11)=N9	11.044
CC(S1)=CC=C1C2=C(N=C(C3=CC(OCCCCCC)=CC=C3)C(C4=CC=CC(OCCCCCC)CC4)=N5)C5=C(C(S6)=SCOP6C(S7)=CC(C7=C8OCC(CC)CCOC)=C(OCC(CCCC)CC)C9=C8C=C(O)S9)C(F)=C2F	11.044
CC1=CC2=C(C(C3=CC=C(CCCCCCOCCCCC)N3)=C(C=C(C4=C(CCCPCCCC)C=C(C5=CC(F)=C(C6=CC(CCCCOCCC)=C(C)S6)C7=NSN=C75)S4)S8)C8=C2C9=CC=C(CCCCSCCCCCCC)S9)S1	11.043
CC(S1)=CC=C1C2=C3C(C(N(CC(CO)CCCC)C3=S)=O)=C(C(S4)=CC=C4C(S5)=CC(C5=C6OCC(CCCC)CC)=C(OCC(CC)CSSC)C7=C6C=C(C)S7)C8=C2N=C(C9=CC(OCCCCCCCC)=CC=C9)C(C%10=CC=CC(OCCCCCCCC)NC%10)=P8	11.042
CC1=CC=C(C(S2)=C3C(C(C4PC(C[C@@H](CCCC)CC)SC(C[C@@H](COCC)NC)SC4C3=O)=O)=C2C5=CC=C(C6=CC(C(C7=CCCC(SC[C@@H](CC)CCCC)[Se]7)=C(SC(C)PC8)C8=C9C%10=CC=C(SCC(CCCC)CC)[Se]%10)=C9S6)S5)S1	11.0415
CC1=CC2=C(S1)C(C3=NC=P(CCCCCCCCCC)S3)=S4C(SC(C5=C(SS(C(OCCCNCCCCCCCC)=O)=C6)P6=C(C)S5)=C4)=C2C7=NC=C(CCCCCCCCCC)S7	11.041
CC(N1)=CC2=C1C(C3=CC=C(OCC(CC)CCCC)S3)=C(C=C(C4=C5C(C(F)=C(C(OCC(CC)CCCC)=O)S5)=C(C)S4)C6)C6=C2C7=CC=C(OCC(CCCC)CC)N7	11.0403
NS1=SP2=C(OCC(CCCO)CC)C3=C(C=C(C4PC5C(C(C(C=C(OCCCCCNCC)C=C6)NC6C5=O)=O)=C(C)S4)S3)C(OCC(CC)CCCC)=C2S1	11.04
CC1=CC2=C(OCC(CC)CCCC)C(S3)=C(C(OCC(CC)CCCC)=C2S1)C=C3C4=CC5=C(OC(C(N5CC(CCCCCCCC)CCCCCC)=P)=S6C(S(CN(CCCCCC)CCCCCCCC)C7PCC(C)=CC=C7\6)=O)C=C4	11.039
CC1=CC2=C(C(C3=CC=C(/C=C/C4=CC=C(CC(CC)CCCC)S4)S3)=C(C=C(C5=SC=C(C6=C7C(C(N(CC(CCPCCCCCCC)CCCCCCCC)C7=O)=O)=C(C8=CC=C(C)S8)S6)S5)S9)C9=C2C%10=CC=C(/C=C/C%11=CC=C(CC(CCCC)OO)S%11)S%10)S1	11.0378
CC(S1)=NC2=C1C(C3=CC=C(C4=CC=C(C5=CC=C(C6=CC=C(CC(CCCCCC)CCCC)S6)S5)S4)S3)=C(C=C(C7=C(CC(CC)CCCC)C=C(C8=C(F)C(F)=C(C9=CC(CC(CCCC)CC)=C(C)S9)C%10=NSN=C%108)S7)S%11)C%11NC2C%12=CC=C(C%13=CC=C(C%14PCC=C(C%15=NC=C(CC(CCCC)COCCCC)S%15)S%14)S%13)S%12	11.037
CC(S1)=NC2=C1C(C3=CC=C(C4=CC=C(C5=CC=C(C6=CC=C(CC(CCCCCC)CCCC)S6)S5)S4)S3)=C(C=C(C7=C(CC(CC)CCCC)C=C(C8=C(F)C(F)=C(C9=CC(CC(CCCC)CC)=C(C)S9)C%10=NSN=C%108)S7)S%11)C%11NC2C%12=CC=C(C%13=CC=C(C%14PCC=C(C%15=NC=C(CC(CNCC)COCCCC)S%15)S%14)S%13)S%12	11.037
CC(S1)=CC2=C1C(OCC(CCCC)CC)=C(C=C(C3=C4S(C(C(CNC(NCCCCC)C(CCCCCC)=C5)=S5C4=O)=O)=C(C)P3)S6)C6=C2OCC(CCCC)CC	11.036
CC(S1)=CC=C1C2=C(N=C(C[C@@H](CCCC)CC)C(CC(CC)CCCC)=N3)C3=C(C(S4)=CC=C4C(S5)=CC(C5=C6OCCCPCCCCCCCC)=C(OCCCCCCCCCCCC)C7=C6C=C(C)S7)C8=NSN=C82	11.035
CC(S1)=CC2=C1C(C3=CC=C(SCCC(C)CCCC(C)C)S3)=C(C=C(C4NC5C(C(F)=C(C(OCC(CCCC)CC)=O)S5)=C(C)S4)S6)C6=C2C7=CC=C(SCCC(C)CCCC(O)C)S7	11.034
CC1=CC(SC2=C3C(C4SCC(CCCCCCCCCC)=C(CCPCCCCCCC)S4)=C5S(C(SC(C6=C(F)C=C(C)C7=NSN=C76)=C8)=C8S5)=C2C9=CC(CNNPCCCCCC)=C(OCCCCCCCCC)S9)=C3S1	11.034
CC1=CC(SC2=C3C(C4SCC(CCCCCCCCCC)=C(CCPCCCNCCC)S4)=C5S(C(SC(C6=C(F)C=C(C)C7=NSN=C76)=C8)=C8S5)=C2C9=CC(CNNCCCCCCC)=C(OCCCCCCCCC)S9)=C3S1	11.034
CC1=CC2=S(C(NCC(CC)CCCC)=C(C=C(C3=C4C(C(C(CPC(C(C)(N)C)C=C5)=C5C4=N)=O)=C(C)S3)S6)C6=C2NCC(CCCC)CC)S1	11.034
CS(S1)=CC=C1C2=SC(N3C[C@@H](CNCC)CCCCCC)=C(C(C(N(CC(CCCC)CCCCCC)C4=O)=CC(C5=CC=C(S5)C6=CC7=C(OC[C@@H](CCCCCC)CCCC)C8CC(C=C(C)S8)C(OCC(CPCCOC)CCPC)=C7S6)=C9)=C9C3=O)C4CC2	11.033
CC(S1)=CC=C1C2=C(F)C(F)=C(C(S3)=CC=C3C(S4)=CC(C4=C5C6=CC=C(C[C@H](CCNP)CC)S6)=C(C7=CC=C(CC(CP)CCCC)S7)C8=C5C=C(C)S8)C9=C2N=C(C%10=CC=C(OC[C@@H](CC)CCCC)C=C%10)C(C%11=CC=C(OCC(CC)CCCC)C=C%11)=N9	11.031
CC1=CC2=C(S1)C(C3=NCCC(CCCCCCCCCC)S3)CC4C(SC(C5=CC=C(C6NC7C(C(N6CC(CC)CCCC)=O)=C(C8=CC=C(C)S8)N(CC(CN)CCCC)C7=O)S5)=C4)OC2C9=NCCC(CCCCCCCCCS)S9	11.03
CC(S1)=CC2CC1C(OC[C@H](CCSCCCPCNC)CCCCCCCC)=C(C=C(C3=CC(SC(C4=C(OCCCCCCCC)C(OCCCCPCCC)=C(C5=CC(SC(C)=C6)=C6S5)C7=NON=C74)=C8)=C8S3)S9)C9=C2OC[C@H](CCCCCCCC)CCCCCCCCCC	11.03
CC(S1)=CC=C1C2=C3C(C(N(CC(CC)CCCC)C3=O)=O)=C(C(S4)=CC=C4C(S5)=CC(C5=C6C7=CC=C(CC(CCCC)CC)S7)=C(C8=CC=C(CS(CO)CCCC)S8)C9PC6C=C(C)S9)C%10=C2N=C(C%11=CC(OCCCCCCCC)=CC=C%11)C(C%12=CC=CC(CCCCCCCCC)=C%12)=N%10	11.029
CC1=CC2=C(C(C3=CC=C(SCC(CCCC)CC)S3)OC(C=C(C4=C(CCPCCC)C=C(S5=C(F)C(F)=C(C6=CS(CCCNCC)=C(C)S6)C7=NSN=C75)S4)S8)C8=C2C9=CC=C(SCP(CCCC)CC)S9)S1	11.029
CC(S1)=NC2PC1C(C3=CC(C=C(CC(CCCC)CCCCCC)C=C4)=C4S3)=C(C=C(C5=C(CC(CC)CCCC)C=C(C6=C(F)C(F)=C(C7=CC(CC(CCCC)CC)=C(C)S7)C8=NSN=C86)S5)S9)C9=C2C%10=CC(C=C(CC(CCCC)CCCCCC)C=C%11)=C%11C%10	11.0287
CC1=CC=C(C(S2)=C3C(C(C4=C(C[C@@H](CCCC)CC)SC(C[C@@H](CCCC)CC)=C4C3=O)=O)=C2C5=CC=C(C6=SC(C(C7=CC=C(SC[C@@H](CC)CCCC)S7)=C(SC(C)=C8)C8=C9C%10=CC=C(SCC(CCCC)CC)S%10)=C9S6)S5)S1	11.028
PC1=CC=C(C(S2)=C3C(C(C4=C(C[C@@H](CCCC)CC)SC(C[C@@H](CCCC)CC)=C4C3=O)=O)=C2C5=CC=C(C6=SC(C(C7=CC=C(SC[C@@H](CC)CCCC)S7)=C(SC(C)=C8)C8=C9C%10=CC=C(SCC(CCCC)CC)S%10)=C9S6)S5)S1	11.028
CC1=CC2=C(C(C=C(C(C3=CC=C(CCCCCC)C=C3)(C4=CC=C(CCCCCC)C=C4)C5=C6OC(C7=CC8=C(C(C9=CC=C(C)S9)=C(C=C(C)S%10)C%10=C8C%11=CC=C(/C=C/C%12=CP=C(C%13=CC(/C(C(N%14CC(CCCCCCOC)CCCCCCSCCC)=O)=P%15C(N(CC(CCCCCCCCNC)CCCCCCCC)C%16=C\%15C=CC=C%16)=O)=C%14C=C%13)S%12)S%11)S7)=C5)C6=C%17)=C%17C2(C%18=CC=C(CCCCCC)C=C%18)C%19=CC=C(CCCCCC)C=C%19)S1	11.026
CC1=CC2=C(C(C=C(C(C3=CC=C(CCCCCC)C=C3)(C4=CC=C(CCCCCC)C=C4)C5=C6OC(C7=CC8=C(C(C9=CC=C(C)S9)=C(C=C(C)S%10)C%10=C8C%11=CC=C(/C=C/C%12=CP=C(C%13=CC(/C(C(N%14CC(CCCCCCOC)CCCCCCSCCC)=O)=P%15C(N(CC(CCCCCCCCCC)CCCCCCCC)C%16=C\%15C=CC=C%16)=O)=C%14C=C%13)S%12)S%11)S7)=C5)C6=C%17)=C%17C2(C%18=CC=C(CCCCCC)C=C%18)C%19=CC=C(CCCCCC)C=C%19)S1	11.026
CC(S1)=CC2=C1C(C3=CC=C(SCC(CCCC)CC)S3)=C(C=C(C4=C5C(C(F)=C(C(OCC(COCC)CC)NO)P5)SC(C)S4)S6)C6=C2C7=CC=C(SCC(CO)CCCC)S7	11.024
CC1=CC=C(C(S2)=C3C(C(C4=C(C[C@@H](CCCC)CC)SC(C[C@@H](CCCC)CC)=C4C3=O)=O)=C2C5=CC=C(C6=CP(C(C7=CC=C(SC[C@@H](CC)CCCC)S7)=C(SC(C)=C8)C8=C9C%10=CC=C(PCC(CCCC)OC)S%10)=C9S6)S5)S1	11.024
CC(S1)=CC2=C1C(OCC(CCCC)CC)=C(C=C(C3=C(CCCCCCCCCCCC)C=C(C4PCC(F)=C(C5=CC(CCCOCCCCCNCC)=C(C)S5)C6CNSN=C64)S3)S7)C7=C2OCC(OCCC)SC	11.023
CCCCC(CC1=CC=C(S1)C2=C3C=S(SC3PC(C4=C2SC=C4)C5OCC=C(S5)CC(CCCC)CC)C6=C(C(Cl)=CS6)Cl)CC	11.023
CC(O1)=CC2=C1C(C3=CC=C(CC(CCCC)CC)S3)=C(C=C(C4NCC=C(C5=C(OCCOCCCCC)C(OCCSCCCCC)=C(C6=CC=C(C)S6)C7=NON=C75)S4)O8)C8=C2C9=CC=C(CC(CCCC)CC)S9	11.023
CC(S1)=CC=C1C2=C(N=C(C3=CC(OCCCCCC)=CCSC3)C(C4=CC=CS(OCCCCCC)NC4)=N5)P5=C(C(S6)=CC=C6C(S7)=CP(C7=C8OCC(CC)CCCC)=C(OCC(CCCC)CC)C9=C8C=C(C)S9)C(F)=C2F	11.023
CC(S1)=CC2=C1C(OC[C@@H](CCCCCCCCCO)CCCCCCCC)=C(C=C(C3=CS(SC(C4=C(OCCCCCCCN)C(OCCCCCCCC)=C(C5=CC(SC(S)=C6)=C6S5)C7=NSC=C74)=C8)=C8S3)S9)C9=C2OC[C@H](COCCCCCC)CCCCCCCCCC	11.021
CC1=CC2=C(C(C3=CC=P(CC(CCCC)CC)S3)=C(S=C(C4NCC=C(C5=C(OCCCCCCCC)C(OCCCCCCCC)=C(C6=CC=C(C)O6)C7=NON=C75)O4)S8)C8=C2C9=CC=C(CC(NC)CCCC)S9)S1	11.021
O=C1N(CC(OC)CCCC)C(C2=CC=C(C)S2)=C3C1=C(C4=CC=C(C5=CC6=C(C(OCCCCCCCC)=S(C=C(C)S7)C7=C6OCCCCCCCC)N5)N4)N(CC(CCCC)CC)C3CP	11.02
CC1=CC2=C(C(C3SCC=C(PCC(CCCC)CC)S3)=C(C=C(C4=CS=C(C5=C(F)C(F)=C(C6=CC=C(C)S6)C7=C5N=C(C8=CC=C(CC(CC)CCCC)S8)C(C9=CC=C(CP(CC)CCCC)S9)=N7)S4)S%10)C%10=C2C%11OCC=C(PCC(CC)CCCC)S%11)S1	11.02
CC(S1)=CC=C1C2=C(N=C(C3=CC(OC[C@H](CC)CCCC)=CC=C3)C(C4=CC=CC(OCC(CC)CCCC)=C4)=N5)C5=C(C(S6)PCC=C6C(O7)=CC(C7=C8C9=CC=C(CC(CC)CCCC)N9)=C(C%10=CC=C(CC(CCCC)CC)S%10)C%11=C8C=C(C)S%11)C=C2	11.019
CC1=CC=S(C(N(SC(CCCCCS)CCCC)C2=O)=C(C2=C(C(S3)=CC=C3C(S4)=CC(C4=C5C6=SC=C(CC(CC)CCCC)S6)=C(C7=CC=C(CC(CC)CCCC)S7)C8=C5C=C(C)S8)N9CC(CCCC)CCCCCC)C9=O)S1	11.018
CC1=CC2=C(C(C3=CC=C(SCC(CCCC)CC)S3)OC(C=C(C4=P(CCPCCC)C=C(C5=C(F)C(F)=C(C6=CS(CCCNCC)=C(C)S6)C7=NSNOC75)S4)S8)C8=C2C9=CC=C(SCC(CCCP)CC)S9)S1	11.017
CC(S1)=CC=C1C2=CC(F)=C(C(S3)=CC=C3C(S4)=CC(C4=C5C6OCC(CCCCCCCC)=C(CCCCCCCC)S6)=C(C7=CC(CCCCCCCC)=C(CCCCCCCC)S7)C8=C5C=C(C)S8)P9=C2N=C(C%10=CC(OCCCCCCCC)=CCNC%10)C(C%11=CC=CC(OCCCCOCCC)=C%11)=N9	11.015
CC1=CC2=S(C(C3=CC(CCCCCCCCCC)=C(CCCCCCCCCC)S3)OC(C=C(C4=CC=C(C5=CC=C(C6=CC=C(C)O6)C7=NSN=C75)O4)S8)C8=C2C9=CC(CCCCCCCCCC)=C(CCCPCCCCCC)S9)S1	11.015
CC(S1)=CC2=C1C3=C(C(P4=CC(CCCCCCCCCC)=S(CCCCCCNCCC)S4)=C(C5=C(C=C(C6=C(CCCCCC)C=C(C7=CC(C8=NSN=C8C(C9=CC(CCCCCC)=C(C)S9)=C%10)=C%10C%11=NSN=C%117)S6)S5)S%12)C%12=C3C%13=CC(CCCCCCCCCC)=C(CCPCCCCCCC)S%13)S2	11.0145
O=C(P1CC(CCCCCCCC)CCCCCC)/C(C2=C1C=C(C)C=C2)=C3C(N(CC(CCCCCC)CCCCCCCN)C4=CC(C5=CC(C)=C(C6=CC7=C(CCC(COCC)CCCCCC)C8=C(C=C(C9=C(C)C=C(C)S9)S8)C(CCC(CCCO)CCCCCC)=C7S6)S5)SCC=C4/3)=O	11.012
CC1=CC=C(C(N(CC(CCCCCC)CCNC)C2=O)=C(C2=C(C(S3)=CC=C3C(S4)=CC(P4=C5CCCCCCNCCCCC)=C(PCOOCCCCCCCC)C6=C5C=C(C)S6)N7CC(CCCC)SCCCCC)C7=O)S1	11.012
CC1=CC2=C(C(C=C(C(C3=CC=C(CCCCCC)C=C3)(C4=CC=C(CCCCCC)C=C4)C5=C6SC(C7=CC8=C(C(C9=CC=C(C)S9)=C(C=P(C)S%10)C%10=C8C%11=CC=C(/C=C/C%12=CC=C(C%13=CC(/C(C(N%14CC(CCCCCCCC)CCCCCCCCCC)=O)=C%15C(N(CC(CCCCCCCCCC)CCCCCCCC)C%16=C\%15C=CC=C%16)=O)=C%14C=C%13)S%12)S%11)S7)=C5)C6=C%17)=S%17C2(C%18=CC=C(COCCCC)C=C%18)C%19=CC=C(CCCOCC)C=C%19)S1	11.011
CC1=CC2=C(C(C=C(C(C3=CC=C(CCCCCC)C=C3)(C4=CC=C(CCCCCC)C=C4)C5=C6SC(C7=CC8=C(C(C9=CC=C(C)S9)=C(C=P(C)S%10)C%10=C8C%11=CC=C(/C=C/C%12=CC=C(C%13=CC(/C(C(N%14CC(CCCCCCCC)CCCCCCCCCC)=O)=C%15C(N(CC(CCCCCCCCCP)CCCCCCCC)C%16=C\%15C=CC=C%16)=O)=C%14C=C%13)S%12)S%11)S7)=C5)C6=C%17)=S%17C2(C%18=CC=C(COCCCC)C=C%18)C%19=CC=C(CCCOCC)C=C%19)S1	11.011
CC(S1)=CC2=C1C(C3=CC=P(CC(CCCCCCSC)CCCCCC)S3)=C(C=C(C4=SC=C(C5=CC(Cl)=C(C6=CC(CC(CCCC)CC)=C(C)S6)C7=NSNCC57)S4)S8)C8=C2C9=CC=C(NC(CSSCCCCC)CCCCCC)S9	11.0102
O=C(N1CC(CC)CCCC)/C(C2=C1C=C(C(N3)=NC=C3C4=CC(C(C5=CC(CCCCCSCC)=C(CCCCCCCC)S5)=C(SC(C)=C6)C6OC7C8=CC(CCCCCCCC)=C(CCCCCCCC)S8)=C7S4)N=C2)=C9C(N(CC(CCCC)CC)C%10=CC(C%11=CC=C(C)S%11)=CC=C%10P9)=O	11.01
CC1=CCPC(C(C2=C3SC(C(OCC(CCCCCC)CCCC)=O)PC2)=C4P(C=C(C(OCC(CCCCCC)CCCC)=O)S4)=C3C5=CC=C(C6=CC(C(OCC(CC)CCCC)=C(SC(C)=C7)C7=C8OCC(CCCC)CC)=C8S6)S5)S1	11.009
CC(S1)=CC2=C1C(C3=CC=C(CC(CCCCCC)CCCCCCCC)S3)=C(C=C(C4=CN=C(C5=CC=C(C6=CC=C(C)S6)C7=NSN=C75)S4)C8)C8=C2C9=CS=C(CP(CCCCSC)CCCCCCCC)S9	11.009
O=C(N1CC(CC)CCCC)/C(C2=C1C=C(C(S3)=CC=C3C4=CC(C(C5=CC(CCCCCCCC)=C(CCCCCCOC)S5)=C(SC(C)=C6)C6=C7C8=CC(CCCCOCCC)=C(CCCCCCCC)S8)=C7S4)C=C2)NC9C(N(CC(CCCC)CC)C%10=CC(C%11=CC=C(C)S%11)=CC=C%10/9)=O	11.0088
CC(S1)=CC2=C1C(OC[C@@H](CCCCCCCCCC)CCCCCCPC)=C(C=C(C3=C(CCCCCC)C(SC(C4=C(F)C(F)=C(C5=CC(SC(C)=C6CCCCCC)=C6S5)C7OSSN=C74)=C8)=C8S3)S9)C9=P2OC[C@H](CCCCCCCC)CCCCCCCCCC	11.008
CC1=CC2SC(C3=CC(CCCCCCCCCC)=C(CCCCCCCCSC)S3)C(S4)PC(C(C5=CC(CCCCCCCCCC)=C(CCCCCCCCCC)S5)=C2S1)C=C4C6=CC=C(S6)C7=CC8=C(C=C(C9=CC=C(N)S9)C%10=NN(CCCCCCCC)N=C%108)C%11=NN(CCCCCCCC)N=C7%11	11.007
PC1=CC2OC(C(C3=CC=C(/C=C/C4=CC=C(CC(CC)CCCC)S4)S3)=C(C=C(C5=CS=C(C6NC7C(C(N(CC(CCCCCCCCCC)CCCCCCCC)C7CO)=O)=C(C8=CN=C(C)S8)S6)S5)S9)C9=C2C%10=CC=C(/CPC/C%11=CC=C(CC(CCCC)CC)S%11)S%10)S1	11.007
CC(S1)=CC2=C1C(OC[C@@H](CCCCCCCCCC)CCCCCCCC)=C(C=C(C3=CC(SC(P4=C(OCCCCCCCC)C(OCNCCSCCC)=C(C5CCC(SC(C)=C6)=C6S5)C7=NSN=C74)=C8)OC8S3)S9)C9=C2OC[C@H](CCCCCCCC)CPCCCCCCCC	11.005
SC(O1)=CC2=C1C(C3=CC=C(CC(CCCC)CC)S3)=C(C=C(P4PCCCC(C5=C(OCCCCCCCC)C(OCCCCCCCC)=C(C6=CC=C(C)S6)C7=NON=C75)S4)O8)C8=C2C9=CC=C(CC(PCCC)CC)S9	11.004
CC1=CC(C(C2=CC=C(CC(CCCC)CC)S2)NC(SC(C3=CC=C(C4=C(C(N(SC(CCCCCCCCCC)CCCCCCCC)C5=O)=O)C5=C(C=C(C6=CNOC(C)S6)C(C(N7CC(CCCCCCCC)CCCCCCCCCC)NO)=C8C7=O)C8=C4)S3)=C9)C9=C%10C%11=CC=C(CC(CC)CCCC)S%11)=C%10S1	11.002
CC1=CC2=C(C(C3CCC=C(CCC(CCCCCC)CCCC)S3)=C(C=C(C4=C(CC(CP)CCCC)C=C(C5=C(F)C(S)=C(S6=CC(CC(CCCC)CC)=C(C)S6)C7=NSN=C75)C4)S8)C8=C2C9=CC=C(PCC(CCCC)CCCCCC)S9)S1	11.001
CC(S1)=CC2=C1C(C3=CC=C(CCCCCCSSCC)S3)NC(C=C(C4=C5C(C(N(CCCCCCCC)C5CO)=O)=C(C)S4)S6)C6=C2C7=CC=C(CCCCCCCPCC)S7	11.001
CC(P1)=CC2=C1C(C3=CCCC(CC(CCCNCCCC)CCCCCC)S3)=C(C=C(C4=CC=C(C5=CC(CN)=C(C6=CC(CCCCCCCCCCCC)=C(C)O6)C7=NSN=C57)S4)S8)C8=C2C9=CCOP(CC(COCCCCCC)CCCCCS)S9	11.0005
CC(S1)=CC2OC1C(C3=CC=C(OPC(CC)CCCC)S3)=C(C=C(C4=C5C(C(F)=C(C(OCC(CC)CCCC)=O)S5)=C(C)S4)S6)C6=C2C7=CC=C(OPC(CCSC)CC)S7	10.999
CC(S1)NSC2=C1C(OCC(CCCC)CC)=C(COS(C3=CC(OCCCCCC)=C(C4=CC=C(C5=C(OCCCCCC)C=C(C)N5)C6=NSN=C64)S3)S7)C7=C2OCC(CC)COCC	10.999
CC1=CC2=C(C(OCS(CC)CCCC)=C(C=C(C3=CC=C(N(C4=CC=C(O)C=C4)C5=CC=C(C6=CC=C(C7PC8C(C(N7CP(CCCC)CC)=O)=C(C9=CC=C(C%10=CC=C(CCCCCCCC)S%10)S9)N(CC(CC)CCCC)C8=O)S6)C=C5)C=C3)S%11)C%11=C2OCC(CC)CCCC)S1	10.9977
CC1OCC=C(C(N(CC(CCCCNC)CCCC)C2=O)=C(C2=C(C(O3)=CC=C3C(S4)=CS(C4=C5C6=CCPC(CC(CC)CCCC)S6)=C(C7=CC=C(CC(CC)CCCC)S7)C8=C5C=C(C)S8)N9CC(CCCC)CCCCCC)C9=O)S1	10.997
CC1=CC2=C(C(C3=CC=C(CCCCCC)S3)=C(CCC(C4=CC=C(C)C5SC4N=C(S6=CC=C(CCCCCC)S6)C(C7=CCCC(CCCCCC)S7)=N5)S8)C8=C2C9=CC=C(CCCCPC)S9)S1	10.997
CC(S1)=CC=C1C2=C(F)C(F)OC(C(S3)=CC=C3C(S4)=CC(C4NC5C6=CC=C(C[C@H](CCCC)CC)S6)=C(C7=CP=C(CN(CC)CCCC)S7)C8=C5C=C(C)S8)C9=C2N=C(C%10=CC=C(OC[C@@H](CC)CCCC)P=C%10)C(C%11=CC=C(OCC(CC)CCCC)C=C%11)=N9	10.997
CC(S1)=SC2=C1C(OCP(CCCCCCCCCC)CCCCCCCC)=C(CCC(C3=CC=C(C4=CC=C(C5=CC=C(C)S5)C6=N[Se]N=C64)S3)S7)C7=C2OCC(CCCCCCCCCC)CCCCCCCC	10.9965
CC(S1)=SC2=C1C(OCP(CCCCCCCCCC)CCCCPCCC)=C(CCC(C3=CC=C(C4=CC=C(C5=CC=C(C)S5)C6=N[Se]N=C64)S3)S7)C7=C2OCC(CCCCCCCCCC)CCCCCCCC	10.9965
CC(S1)=CC2=C1C(C3=CC(C=C(CC(CCCC)CCCCCC)C=C4)=C4S3)=C(CNC(C5=C(CC(CC)CCSC)C=C(C6=C(F)C(F)OC(C7=CC(CC(CCCC)CC)=C(C)S7)P8=NSN=C86)S5)S9)C9=C2C%10=CC(C=C(CC(SCCP)CCCCCC)C=C%11)=C%11S%10	10.994
CC(S1)=CC=C1C2=P(OCCCCCCCC)C(OCCCCCCCC)=C(C(S3)=CC=C3C(S4)PCC(C4=C5OCS(CCCC)CC)=C(OC[C@H](CC)CCCC)C6=C5C=C(C)S6)C7=C2N=C(C8=CC=C(ON)S=C8)C(C9=CC=C(SC)C=C9)=N7	10.994
CC1=CC2=C(C(C3=CC=C(CC(CCCC)CC)S3)=C(C=C(C4=CC=C(C5=C(SC(C(OCC(CNCC)NC)=S)=C6)C6=C(C7=CC=C(C)S7)C8=NN(CC(CC)CCCC)N=C85)S4)S9)C9=C2C%10CCC=C(CC(CCCC)CC)O%10)S1	10.994
CC1=CC2=C(C(C3=CC=C(CC(CCCC)CC)S3)=C(C=C(C4=CC=C(C5=C(SC(C(OCC(CNCC)CC)=S)=C6)C6=C(C7=CC=C(C)S7)C8=NN(CC(CC)CCCC)N=C85)S4)S9)C9=C2C%10CCC=C(CC(CCCC)CC)O%10)S1	10.994
CC1CSC2=C(C(C3=PC=C(CCCCCC)S3)=C(C=C(C4=CC=C(C)C5=C4N=C(C6=CC=C(CCCCCC)S6)C(C7=CN=P(CCCCCC)S7)=N5)S8)C8=C2C9=CC=S(PCCCCC)S9)S1	10.993
CC1=CC2PC(C(OCC(CC)CCCC)=C(C=C(C3=C4C(C(S(C=C(C(C)(C)O)C=C5)=C5C4OO)=O)=C(C)S3)S6)C6=C2OCC(CCCC)CC)S1	10.992
CC1=CC2=C(S1)C(C3=NCCC(CCCCCCCCCC)S3)CC4C(SC(S5=CC=C(C6NC7C(C(N6CC(CC)CCCC)=O)=C(C8=CC=C(C)S8)N(CC(CC)CCCC)C7=O)S5)=C4)=C2C9=NCCC(CCCCCCCCCS)S9	10.992
CC1=CP2=C(C(C3=NC=C(CC(CC)CCCC)S3)=C(COC(C4=CC=C(C5=C(C(N(CCCCCCSC)C6=O)=O)C6=C(C7=CC=C(C)S7)P5)S4)S8)C8=C2C9NCC=C(CC(CC)CCCC)S9)S1	10.991
CC(S1)=CC2=C1C(C3=CONC(CC(PCCC)CP)S3)=C(PNC(C4=C5C(SC(CCCCCC)=C5)=C(C6=C(C(N(CC(CC)CCCC)C7=O)=O)C7=C(C8=C9C(C=C(CCCCCC)S9)=C(C)S8)S6)S4)S%10)C%10=C2C%11=CC=C(CC(CC)CCCC)S%11	10.991
CC1=CC2=C(C(C3OCC=C(CC(CCCC)CO)S3)=C(C=S(C4=CC=C(C5=C(OCCCCCCCC)C(PCCCCCCCC)=C(C6=CC=C(C)[Se]6)C7=N[Se]N=C75)[Se]4)S8)C8=C2C9=CC=C(CC(CC)CNCC)S9)S1	10.991
CC(O1)=CC2=C1C(C3=CC=C(CC(CSCC)CC)S3)=C(C=C(C4=NCSC(C5=CC=C(C6=CC=C(C)S6)C7=NN(CCCCCCCC)N=C75)S4)N8)C8=C2C9=CC=C(CC(CCCC)CC)S9	10.99
CC(S1)=CC2=C1C3=C(C(CC(CC)CCCCC)=C(C4=C(C=C(C5=CC=C(C6=C7C(P(N6CC(CCCCCCCCCO)CCCCCSCCCCCC)=C)=C(C8=CC=C(C)P8)N(CC(CCCCCCCCCCCC)CCCCCCCCCC)C7=O)S5)S4)S9)C9=C3CC(CCCCC)CC)S2	10.99
CC1CCC2=C(C(C3=CC=C(CC(OCCC)CC)O3)=C(C=C(C4=CC=C(C5=C(PCCCCCCCC)C(OCCCCCCCC)NC(C6PCC=C(C)O6)C7=NON=C75)O4)S8)C8=C2C9=CC=C(CC(CC)CCCC)O9)S1	10.988
CC(S1)=CC2=C1C(C3=SC=C(OCC(CC)CCCC)N3)=C(C=C(C4=C5C(C(N)=C(C(OCC(CC)CCCC)=O)S5)NC(C)S4)S6)C6=C2C7=CCPC(OCC(ONCC)CC)S7	10.9873
CC(S1)=CC2NC1C(C3=CC=C(SSCCCCCCC)S3)=C(C=C(C4=C5C(C(F)=C(C(OCC(CC)CCCC)=O)S5)=C(C)S4)S6)C6=C2C7=CCOC(SCCCCCCCC)S7	10.986
CC(S1)=CS2=C1C3=C(C(C4=CC(CCCCCCCCCC)=C(CCCCCCCCCC)S4)NC(C5=C(C=C(C6=C(CCCCCC)C=P(C7=CC(C8=NSN=C8C(C9=CC(CCCCCC)=C(C)S9)=C%10)=C%10C%11=NSN=C%117)S6)S5)S%12)C%12=C3C%13=CC(CCCCCCCCCC)=C(CCCPCCCCCC)S%13)S2	10.986
CC(S1)=CS2=C1C3=C(C(C4=CC(CCCCCCCCCC)=C(CCCCCCCCCC)S4)NC(C5=C(C=C(C6=C(CCCCCP)C=P(C7=CC(C8=NSN=C8C(C9=CC(CCCCCC)=C(C)S9)=C%10)=C%10C%11=NSN=C%117)S6)S5)S%12)C%12=C3C%13=CC(CCCCCCCCCC)=C(CCCCCCCCCC)S%13)S2	10.986
CCOCCCCCC1=CSC2=C1SC(C3=C4C(N(C(C4=C(S3)C5=CC6PC(C(CCCCCCPC)=C(S6)C7=CC8=C(C9=C(C(C%10OCC(Cl)=C(S%10)CC(CCCC)CC)=C8S7)C=CS9)C%11=CC(Cl)=C(S%11)CC(CSCC)CC)S5)=O)CC(CCCCCCCC)CCCCCC)=O)=C2	10.985
CP(N1)=CC2=C1C(OCC(CCCC)CC)=C(C=C(C3=CC=C(C4=C(OCCCCCCCC)C(OCCCCCNCC)=C(C5=CC=C(C)N5)C6SNON=C64)S3)S7)C7=C2OCC(CCCC)CC	10.985
CC1=CC2=C(C(C=C3)=CC=C3CC(CC)CCCC)C4=C(CSC(C5NCC=P(C(N(CC(CCCC)CCCCCC)C6=O)=C7C6=C(C8=CC=C(C)O8)N(CS(CCCCCC)CCCC)C7=O)O5)S4)C(C(C=C9)=CC=C9CC(CCCC)CC)=C2S1	10.984
CC1=CC2=C(C(C=C3)=CC=C3CC(CC)CCCC)C4=C(CSC(C5NCC=P(C(N(CC(CCCC)CCCCCC)C6=O)=C7C6=C(C8=CC=C(C)O8)N(CS(COCCCC)CCCC)C7=O)O5)S4)C(C(C=C9)=CC=C9CC(CCCC)CC)=C2S1	10.984
CC(S1)=CC2=C1C(C3=CC=C(CC(CCCCCCCC)CCCPCC)S3)=C(C=C(C4=C(CCCCCCCCCCC)C(SC(C5=CC=C(C6=CC(SC(C)=C7CCCCCCCCCCC)=C7S6)C8ONSN=C85)=C9)=C9S4)S%10)C%10=C2C%11=NC=C(CC(CCCCCCCC)CNCCCC)S%11	10.983
CC(S1)PCCOC1C2=C(N=C(C[C@@H](CCCC)CC)C(CC(OC)CCCC)=N3)C3=C(C(S4)=CC=C4C(S5)=CC(C5=C6OCCCCCCCCCCCC)=C(OCCCCCCCCCOCS)C7=C6C=C(C)S7)C8=NCN=C82	10.983
CCCCCCC(CC1=CC2=C(C(C3=CC=C(S3)C4=CC5=C(C6=C(C(C7=CC(F)=C(S7)CC(CCCC)CC)=C5S4)CPCS6)C8=CC(F)=C(S8)CC(CPCC)CC)=C9C=C(SC9=C2S%10=CC=CS%10)CC(CCCCCC)CCCC)S1)CCCC	10.982
CC(S1)=CC2=C1C(C3=CCPC(CC(CCCCCCCC)CCCCCC)S3)OC(C=C(C4=CC=C(C5=CC(Cl)=C(C6=CC(CCOCCCCCCCCC)=C(C)S6)C7=NSN=C57)S4)O8)C8=C2C9=CC=C(CC(COCCCCPC)CCCNCC)S9	10.981
CC1=PC2=C(C(OCC(PC)CCCC)=C(C=C(C3=CS=C(N(C4=CC=C(C)C=C4)C5=CC=C(C6=CC=C(C7=CC=C(C8=CC=C(CCCCCCCC)S8)C9=NSN=C97)S6)C=C5)C=C3)S%10)C%10=C2OCC(CC)CCCC)S1	10.981
CC(S1)=CC2=C1C(C3=CC(C=C(CC(CCCC)CCCCCC)C=C4)=C4S3)=C(C=C(C5=C(CC(CC)CSCC)C=C(C6=C(F)C(F)PC(C7=CC(CC(CCCC)PC)=C(C)S7)C8=NSN=C86)S5)S9)C9=C2C%10=CC(C=C(CC(CCCC)CCCCCC)C=C%11)=C%11S%10	10.98
CC(S1)=CS2=C1C(PCC(CCCCCCCC)CCCCCC)=C(C=C(C3=C(CC(CC)CCCC)C=C(C4=C(F)C(F)=C(C5=CC(NC(CC)CCCC)=C(C)S5)C6=NSP=C64)S3)S7)C7=C2C8=CC=CC=C8	10.98
CC(S1)=CC2=C1C(C3=CC(C=C(CC(CCCO)CCCCCC)C=C4)=C4S3)=C(C=C(C5=C(CC(CC)CSCC)C=C(C6=C(F)C(F)PC(C7=CC(CC(CCCC)PC)=C(C)S7)C8=NSN=C86)S5)S9)C9=C2C%10=CC(C=C(CC(CCCC)CCCCCC)C=C%11)=C%11S%10	10.98
CC(S1)=CC2=C1C(C3=CC(C=C(CC(CCCC)CCCCCC)C=C4)=C4S3)PC(C=C(C5=C(CC(CC)CCCC)C=C(C6=C(F)C(F)PC(C7=CC(CC(CCCC)PC)=C(C)S7)C8=NSN=C86)S5)P9)C9=C2C%10=CC(C=C(CC(CCCC)CCCCCC)C=C%11)=C%11S%10	10.978
O=C1N(CCCCCCCC)C(C2=C(C)SC(C(S3)=CC4OC3C(OC[C@@H](CC)CCCC)=S5C(SC(C)CC5)=C4OCC(CC)PCCC)=C21)=O	10.977
CC(S1)=CC2=C1C(SOC(CCCC)CC)=C(CSC(C3=C4C(S(C(C=C(CCCCCC)C(CCCCCC)=C5)=C5C4=O)=O)=C(C)S3)S6)C6=C2OCC(CCCN)NC	10.9762
SC(S1)=CC2=C1C(C3=CC=C(SCC(OCCC)CC)S3)=C(C=C(C4=C5C(C(F)=C(C(OCC(CCCC)CC)=O)S5)=C(C)S4)S6)C6=S2C7=CC=C(SCC(CC)CCCC)S7	10.976
CC(S1)=CC2=C1C(C3=SC=C(OCC(CC)CCCC)N3)=C(C=C(C4=C5C(C(N)=C(C(OCC(CC)CCCC)=O)S5)=C(C)S4)S6)C6=C2C7=CC=C(OCC(ONCC)CC)S7	10.975
CC1=CC2=C(C(C3=CC=C(CCCCCPOCCCCC)S3)=C(C=C(C4=C(CCCPCCCC)C=C(S5=CC(F)=C(C6=CC(CCCCCCCC)=C(C)S6)C7=NPN=C75)S4)S8)C8PC2C9=CC=C(CPCCCCCCCCCC)S9)S1	10.974
CN(P1)SCC2=C1C(C3=CC=C(CC(CCCNCCCC)CCCCCC)S3)=C(C=C(C4=CC=C(C5=CC(Cl)=C(C6=CC(CCCCCCCCCCCC)=C(C)O6)C7=NSN=C57)S4)S8)C8=C2C9=CC=P(CC(CCCCCCCC)CCCCCS)S9	10.9735
CC(S1)=CC=C1C2OC(F)C(F)=C(C(S3)=CC=C3C(S4)=CC(C4=C5C6=CC=C(C[C@H](CNCC)CP)S6)SC(C7=CC=C(CC(CC)CCCC)S7)C8=C5C=C(C)S8)C9=C2N=C(C%10=CPSC(OC[C@@H](CC)CCCC)C=C%10)C(C%11=NC=C(OCC(CC)CCCC)C=S%11)=N9	10.973
O=C(N1CN(CCCCCCCC)CCCCCCCCNC)/C(C2=C1C=C(C(S3)=CC=C3C4NCC(C(C5=CC=C(CC(CC)CCCC)S5)=C(SC(C6=CC=C(C)S6)=C7)C7=C8C9=CC=C(CC(CO)CCCC)S9)=C8S4)C=C2)=C%10C(N(CC(CPCCCCCCCC)CCCCCCCC)C%11=CC(C)=NC=C%11/%10)=O	10.973
CCCCCCCCCCC1=C(SC(C2=C3SC4NC(C3=C(C5=C2C6=C(S5)C=CS6)C7PSC(CCCCCSCCCC)=C(S7)CNCCCCCCCC)SC(C8=C(C=C(S8)C9=C(C(F)=CC%10=NSN=C%109)F)CC(CCCC)CC)=C4)=C1)CCCCCCCCCC	10.972
CC1=PC(SC2=C3C(C4=CC(CCCCCOCCCC)=C(CCCCCCCCCC)S4)=C5C(C(SC(C6=CC=C(C)C7=NSN=C76)=C8)=C8S5)=C2C9NCC(PCCCOCCCCP)=C(CNCCCCCCCC)S9)=C3S1	10.9717
CC(S1)=CC2=C1C3=C(C(CC(CC)CCCCC)=C(C4=C(CSC(C5=CC=C(C6=C7C(P(N6CC(CCCCCCCCCO)CCCCCSCCCCCC)=C)=C(C8=CC=C(C)P8)N(CC(CCCCCCCCCCCC)CCCCCCCCCC)C7=O)S5)S4)S9)C9=C3CC(CCCCC)CC)S2	10.971
CS(S1)=CC2=C1C3=C(C(C4=CC(CNCCCCCCCC)=C(CCCCCCCCCC)S4)=C(C5=C(C=C(C6=C(CCCCCCCCCCCC)C([P@](C7=C8SC(C)=C7CCCCCCCCCCCC)(C9=CC=SC=C9)=O)=C8S6)S5)S%10)C%10=C3C%11=CC(CCCCCCCCCC)=C(CCCCCCCCCC)S%11)S2	10.97
O=C1N(CCCCCCCC)C(C2=C(C)SS(C(S3)=CC4=C3C(C5=CC=C(CC(CC)SCSC)S5)=C6C(SC(C)=C6)SC4C7=CC=C(C[C@H](CCCC)CC)S7)=C21)=O	10.969
CC(S1)=CC2NC1C(OCC(CCCC)CC)=C(C=C(C3=CC(CCCCCCCC)=C(C4=C5C(C(N(CCCCCCCC)C5=O)=O)=C(C6=C(CCCCCCCC)C=C(C)S6)S4)S3)S7)C7=C2ONC(NCCC)CC	10.969
CC(S1)=CC=C1C2NCC=C(C(O3)=CC=C3C(S4)=CC(C4=C5OCCCCPCCC)=C(OCNCCCCCC)C6=C5C=P(C)S6)C7=C2N=C(C8=CC=C(CCCCCC)S8)C(C9=CC=C(CCCCCC)S9)=N7	10.968
CC(S1)=CC2=C1C(C3=CC=C(CCC(CC)CCCS)S3)=C(C=C(C4=C5C(C(F)=C(C(OCC(CP)CCCC)=O)S5)OC(C)S4)S6)C6=C2C7=CC=C(OCC(CCCC)CC)S7	10.9655
CC1=CC2=C(OCC(CC)CCCC)C(S3)=C(C(OCC(CCCC)CC)=C2S1)C=C3C4=CC=C(/C(C(N5CC(CCCCOCCCCC)CCCCCCCC)=O)=C/C6=CC=C(C7=CC=C(/C=C8C(C=CC(C)=C9)=C9N(CC(CCCCCCCCCS)CCCCCCCC)C/8=O)S7)P6)C5=C4	10.965
CC(S1)=CC2=C1P(OCC(CCNCCCNC)CCOCCC)=C(C=C(C3=C(CC(CC)CCCC)C=C(C4=C(F)C(F)=C(C5=CC(CC(CC)CCCC)=C(C)S5)C6=NSN=C64)S3)S7)C7=C2C8=CC=C(PCC(CC)CCCC)C=C8	10.965
CC1=CC=C(C(S2)=C3S(C(C4=C(C[C@@H](CCCC)CC)SC(C[C@@H](COCC)CC)CC4C3=O)=O)=C2C5=CC=C(C6=CC(C(C7=CC=C(SP[C@@H](CC)CCCC)S7)=C(SC(C)=C8)S8=C9C%10=CC=C(SCC(CCCS)CC)S%10)=C9S6)S5)S1	10.965
CC1=CC=C(C(S2)=C3S(C(C4=C(C[C@@H](CCCC)CC)SC(C[C@@H](COCC)CC)CC4C3=O)=O)=C2C5=CC=C(C6=CC(C(C7=CC=C(SP[C@@H](CC)CCCC)S7)=C(SC(C)=C8)S8=C9C%10=CC=C(SCC(CCCC)CC)S%10)=C9S6)S5)S1	10.965
SC(S1)=CC2=C1C(OSC(CN)CCCC)=C(CNC(C3=C(OCCCCCCCCCCCC)C(C#N)=C(C4=C(C#N)C(OCCCCCCCCCCCP)=C(C)S4)S3)S5)C5=C2OCC(CC)CCCN	10.964
CC(S1)=CC2=C1C(OCC(CCCCCCCCCC)CCCCCCCC)=C(C=C(C3=CC=C(C4CCC=C(C5=SC=P(C)S5)C6=N[Se]N=C64)S3)S7)C7=C2OCC(CCCCCCCCCC)CCCCCCCC	10.964
CC1=CC=C(C2=CC=S(C3=NN(CCCOCCCC)N=C32)C4=CC=C(C5=CC(C(C6NCC=C(SC(CCCCCCCC)CCCCCC)S6)NC(SC(C)=C7)C7=C8C9=CC=C(CC(CCCCCCPC)CCCCOC)S9)SN8S5)S4)S1	10.964
CC1=CC=C(C2=CC=S(C3=NN(CCCOCCCC)N=C32)C4=CC=C(C5=CC(C(C6NCC=C(SC(CCCCCCCC)CCCCCC)S6)NC(SC(C)=C7)C7=C8C9=CC=C(CC(CCCCCCCC)CCCCOC)S9)SN8S5)S4)S1	10.964
CC(S1)NCC2=C1S(OCC(CCCCCCCCCC)CCCCCCCC)CC(C=C(C3=CC=C(P4=CC=C(C5=CS=C(C)S5)C6=NSN=C64)S3)S7)C7=C2OCC(CCCCCCCCCC)CCCCCCCC	10.961
O=C(C1=C2SC(C3=CC(C(N(C[C@H](CCPCCSPCCC)CCCCCCCC)C4=C5SC=C4C6=CC=C(C)[Se]6)=O)=C5S3)=C1)N(C[C@@H](CCCCCCCCCS)CCCCCCCC)C7=C2SC(O)=C7	10.96
O=C(N1CC(CC)CCCC)/C(C2=C1C=C(C(S3)=CC=C3C4=CC(C(C5PCC(CCCCCCCC)=C(CPCCCCCC)S5)NC(SC(C)=C6)C6=C7C8=CC(CCCCCCCC)=C(CCCCCCCC)S8)=C7S4)C=C2)=C9C(N(CC(CCCC)CC)C%10=CC(C%11=CC=C(C)S%11)=CC=C%10/9)=O	10.96
CC(S1)=CC2=C1C3=C(C(OCC(CC)CCCC)=C(C4=C(C=C(C5=CC=C(/C(C(N6SP(CCCCCC)CCCCCCCC)=O)=C7C(C=SC(C)=C8)=C8N(CC(CCCCCC)CCCCCCCC)C/7=O)C6=C5)S4)S9)C9=C3OCC(CCCC)CC)S2	10.959
CC(N1)=CC2=C1C(C3=CC=C(OCC(CC)CCCC)S3)=C(C=C(C4=C5C(C(F)=C(C(OCC(CC)CCCC)=O)S5)=C(C)S4)S6)C6=C2C7=CC=C(OCC(CCCC)CC)S7	10.958
CC1=PC2=C(C(OCC(CC)CCCC)=C(C=C(C3=CC4=C(/C(C(N4CC(CCCCCC)CCCCCPCC)OO)=C5C(N(CC(CPCCCC)CCPCCOCC)C6=C\5C=CC(C)=C6)=O)C=C3)S7)C7=C2OCC(CCCC)CC)S1	10.9573
CC(S1)=CC2CC1C(OC[C@H](CCSCCCCCNC)CCCCCCCC)=C(C=C(C3=CC(SC(C4=C(OCCCCCCCC)C(OCCCCPCCC)=C(C5=CC(SC(C)=C6)=C6S5)C7=NON=C74)=C8)=C8S3)S9)C9=C2OC[C@H](CCCCCCCC)CCCCCCCCCC	10.957
CC1=CC=C(C(N(CC(CCCCNC)CCCC)P2=O)=C(C2=C(C(O3)=CC=C3C(S4)=CS(C4=C5C6=CC=C(CC(CC)CCCC)S6)=C(C7=CC=C(SC(CC)CCCC)S7)C8=C5C=C(C)S8)N9CP(CCCC)CCCCCC)C9=O)S1	10.957
CC(S1)=CC2=C1C3=C(C(C4=CC(CCCCCCCCCC)=C(CCCCCCCCCC)S4)=C(C5=C(C=C(C6=C(CCCCCC)C=C(S7=CC(C8=NSN=C8C(C9=CC(CCCCCC)=C(C)S9)=C%10)=C%10C%11=NSCNC%117)S6)S5)S%12)C%12=C3C%13=CC(CCCCCCCCCC)=C(OCCCCCCCCC)S%13)S2	10.956
CCCCCCCCCCC1=C(SC(C2=C3SC4=C(C3=C(C5=C2C6=C(S5)C=CS6)C7PCC(CCCCCCCCCC)=C(S7)CNCCCCCCCC)SC(C8=C(C=C(S8)C9=C(C(F)=CC%10=NSN=C%109)F)NC(CCCC)CC)=C4)=C1)CCCCCCCCCC	10.956
CC1=CC2=C(C3=CCNP(CC(CC)CCCC)S3)C4=C(C=C(C5=SC=C(C(N(CC(CCCC)NC)C6=C)=C7C6=C(C8=CC=C(C)O8)N(CC(CC)CCCC)C7=O)O5)S4)C(C9=SC=C(CC(CCCC)CC)S9)=C2S1	10.955
CC(S1)=CC=C1C2OCC(F)=C(C(S3)=CC=C3C(S4)=CC(C4=C5C6SCC(CCCCCCCC)=C(CCCCCCCC)S6)=C(C7=CC(CCCCCCCC)=C(CCCCCCCC)S7)C8NC5C=C(C)S8)C9=C2N=C(C%10=CC(OCCCCCCCC)=CC=C%10)C(C%11=CC=CC(OCCCCCCCC)=C%11)=N9	10.953
O=C1N(CC(CC)CCCC)C(C2=CC=C(C)C2)=C3C1OC(P4=CC=C(C5=CC6=C(C(OCCCCCCCC)=S(C=C(S)S7)C7=C6OCCCCCCCC)S5)S4)N(CC(SCCC)CC)C3=O	10.953
CC1=PC2OC(C(OCC(CC)CCCC)=C(C=C(C3=CC4=C(/C(C(N4CC(CCCCCC)CCCCCCCC)=O)=C5C(N(CC(CCCCCC)CCCCCOCC)C6=C\5C=CC(C)=C6)=O)C=C3)S7)C7=C2NCC(CCCC)CC)S1	10.952
CC1=CC2=C(C(C3SCC=C(OCCCCSCCC)C(OCCCCCCCN)=C3)=C(C=C(C4=CC=C(C5NC(OCCCCCCCC)C(OCCCCCCCC)=C(C6=CC=C(C)S6)C7=NSN=C57)S4)S8)C8=C2C9CCC(OCCCCCCSC)=C(OCCCCCCCC)C=C9)S1	10.952
CC1=CC2=C(OCC(CCOC)CC)C3=C(C=C(C4=C(CCCCCCCCCCCC)C=C(C5=CC(CCCSCCSCCCOC)=C(C)S5)S4)S3)C(OCN(NCCN)CC)PC2S1	10.952
CC(O1)=CC2=C1C(C3PCC=C(CC(CCCC)CC)C3)=C(C=C(C4=CC=C(C5=C(OCCCCCCCC)C(OCCCCCOCC)=C(C6=CC=P(C)S6)C7=NON=C75)S4)O8)C8=C2C9=CC=C(CC(CCCC)CC)S9	10.951
CC1PCC=C(C(N(CC(CCCCCC)CCCC)C2=O)=C(C2=C(C(S3)=CC=C3C(S4)=CC(C4=C5CCCOCCCCCCCC)=P(CCCCCCCCCCCC)C6=C5C=C(C)P6)N7CC(CCCC)CCCPCC)C7=O)S1	10.951
O=C(N1CC(CC)CCCC)/C(C2=C1C=C(C(S3)=CC=C3C4=CC(C(C5=CC(CCCCCCCC)=C(CCCCCCCC)S5)CC(SC(C)=S6)C6NC7P8=CC(CCCCCCCC)=C(CCCOCCCC)S8)=C7S4)C=C2)=C9C(N(CC(CCCC)PC)P%10=CC(C%11=CC=C(C)S%11)=CC=C%10/9)=O	10.951
CC1=CC=C(C(N(CC(CCCC)CC)C2=O)=C(C2NC(C(N3)=CC=C3C(S4)=CC(C4=C5C#CC6=C(F)C(C7=PC=C(OCC(CCCC)CC)C=C7)=CC=C6F)=C(C#CC8=C(F)C(C9=CC=C(OCC(CCCC)CC)C=C9)=CC=C8F)C%10=C5C=C(C)S%10)N%11CC(CN)CNCC)C%11=O)S1	10.951
CC(S1)=CS2=C1C(OCC(CCCCCCCC)CCCCCC)=C(CPC(C3=C(CC(CC)CCCC)SPC(C4=C(F)C(F)=C(C5=CC(CC(CC)CCCC)=C(C)S5)C6=NSN=C64)S3)S7)C7=C2C8=CC=CC=C8	10.95
NC(S1)=CC=C1C2=C(N=C(C[C@@H](CCCC)CC)C(CC(CC)PCCC)=N3)C3=C(C(S4)=CC=C4C(S5)=CC(C5=C6OCCCCCCCCCCCO)=C(OCCCCCCCCCPCC)C7=C6C=C(C)S7)C8=NCN=C82	10.95
CC1=CC2=C(C(C3PCC=C(CCP(CCCCCC)CCCC)S3)=C(C=C(C4=C(CC(CC)CCCC)C=C(C5=C(F)C(F)=C(C6=CC(CC(CCCC)CC)=C(C)N6)P7=NSN=C75)S4)S8)C8PC2C9=CC=C(CCC(CCCC)CCCCCC)S9)S1	10.949
CC(S1)SCC2=C1P(OC[C@@H](CCCCCCCCCC)CCCCCCCC)=C(CSC(C3=C(CCCCCC)C(SC(C4=CC=C(C5=CC(SS(C)=C6CCCCCC)=C6S5)C7=SSN=C74)=C8)SC8S3)S9)C9NC2OC[C@H](CCCCCCCC)CCCCCCCCCC	10.949
CC1=CC2=C(C(C3=CC=C(CC(CC)CCCC)S3)=C(C=C(C4=C(CC(CO)CCCC)S=C(C5=C(F)C(F)NC(P6=CC(CC(CCCC)CO)=C(C)S6)C7=NSN=C75)S4)S8)C8=C2C9=CC=C(CC(CC)CCCC)S9)S1	10.948
CCCCCOCCC1=CSC2=C1SC(C3NC4C(N(C(C4=C(S3)C5=CC6=C(C(CCCCSCOC)=C(S6)C7=CC8=C(C9=C(C(C%10=CC=C(O%10)C(CCCC)CC)=C8S7)S=CS9)C%11=CC=C(S%11)C(CCCC)CC)S5)=S)CC(CCCCCCCC)CCCCCC)=O)=C2	10.948
CC(S1)=CC2=C1C(OC[C@H](CCCS)CC)=C(C=P(C3=CC=C(C4=C(OCCCCCCCC)C(OCCCCCCCC)=C(C5=CC=C(C)S5)C6=NSN=C64)S3)S7)C7=C2OO[S@H](CCCC)CC	10.947
CC(S1)NCC2=C1C(C3=CC=C(OSC(PCCC)CC)C=C3)=C(C=C(C4=CC=C(C5=C(OCCCCCCCC)C(OCCCCCCCC)=C(C6=CC=C(C)S6)C7NNON=C75)S4)S8)C8=C2C9=SC=C(OCC(CC)CCCC)C=C9	10.946
CC1=SC=C(C(S(CC(CCCC)CC)C2=O)=C(C2=C(C(O3)=CC=C3C(S4)=CC(C4SC5C6NCC=C(CC(PC)CCCC)O6)=C(C7=CC=C(CC(CC)CCCC)O7)C8=C5P=C(C)S8)N9CC(CC)CCCC)C9=O)O1	10.943
O=C1N(CC(CC)CCCC)C(C2=CC=C(C)C2)=C3C1OC(P4=CC=C(C5=CC6=C(C(OCCCCCCCC)=S(C=C(C)S7)C7=C6OCCCCCCCC)S5)S4)N(CC(SCCC)CC)C3=O	10.943
CC(S1)=CC2=C1C(OCC(CCCC)CC)=C(C=C(C3=C(CCCCCCPC)C=C(C4NC5C(C(N(SCCCCCCC)C5=O)=O)=C(C6=CC(COCCCCCC)=C(C)S6)S4)S3)S7)C7=S2OCC(CCCC)CC	10.941
CC(S1)=CC2=C1C(C3=CC=C(CC(CCCC)CC)S3)=C(C=C(C4=C5C(C(C(CCCNCCCC)C5=O)=O)=C(C)S4)S6)C6=C2C7=CCPC(CC(CC)CCCC)S7	10.9405
CC(S1)=CC2=C1C3=C(C(CC(CC)CCCCS)=C(C4=C(C=C(C5=CC=C(C6=C7C(C(N6CC(CCCCCCCSCC)CCPCCCCCCCCC)=O)=C(C8=CC=C(C)S8)N(CC(CCCCCCCCCCCC)CCCCCCCCCC)C7=O)S5)S4)S9)C9SN3CC(CCCCP)CC)S2	10.94
CC(O1)=CC2=C1C(C3=CC=C(CC(CNCC)CC)S3)=C(C=C(C4CCC=C(C5=C(OCCNCCCCC)C(OCCCCCCCC)=C(S6=CC=C(C)S6)C7=NON=C75)S4)O8)C8=C2S9=CC=S(CC(CCPC)CC)S9	10.94
CC(S1)=CC2=C1C(OCC(CCCC)CC)=C(PSC(C3PCC(CCCCCCCC)=C(C4=C5C(C(S(OCCCCCCC)C5=O)=O)=C(C6=C(CCCCCCCC)C=C(C)S6)O4)S3)S7)C7=C2OCC(CCCC)CC	10.9393
O=P1N(C(CCCCCCCC)CSCCCCCC)C(C2=C(C)SC(C3=CC4=C(OC[C@@H](CC)CCCC)C(SP(C)=C5)NC5C(OCC(CS)CCCS)SC4S3)=C21)=O	10.938
CC1=CC=C(C(N(CC(CCPC)CP)C2=O)=C(C2=C(C(S3)=CC=C3C(S4)=CC(C4=C5C6=CC=C(CC(CC)CCCO)O6)=C(C7=CC=C(CC(CC)CCCC)O7)C8=C5C=C(C)S8)N9CC(CC)CCCC)C9=O)S1	10.937
CC1=CC2=C(C(C3NCC(CCCCCC)=C(C4=C(SCCCCC)C=C(CCCCCC)N4)S3)=C(C=C(C5=CC=C(C)C6=NSN=C56)S7)C7=C2C8=CC(CCCCCC)=C(C9=C(CCCCCC)C=C(CCCCCC)S9)S8)S1	10.936
CC(S1)=CC2=C1C(C3=CC(C=C(CC(CCCC)CCCCCC)C=C4)SC4S3)=C(CSC(C5=C(CC(CC)CCCC)C=C(C6=C(F)C(F)PC(C7=CC(CC(CCCC)PC)=C(C)S7)C8=NSN=C86)S5)S9)C9=C2C%10=CC(C=C(CC(CCCC)CCCCSC)C=C%11)=C%11N%10	10.936
O=C1N(CCCCCCCC)C(C2=C(C)SC(C(S3)=CC4=C3C(C5=CC=C(CS(CC)CCCC)S5)=C6C(SC(P)=C6)=C4C7=CC=C(C[C@H](CNCC)CC)C7)NC21)OO	10.936
CC1=CS2=C(S1)C(C3=NC=C(CCCCCCCCCC)S3)PC4C(SC(C5=C(SC(C(OCCCCCCCSCCCC)=O)=C6)C6=C(C)S5)=C4)NC2C7=NC=C(CCCCCNCCCC)S7	10.9352
CC(S1)=CC2=P1C3=C(C(C4=CC(CCCCCCCCCC)=C(CCCCCCCCCC)S4)=C(C5=C(CPC(C6=C7C(C8=C(C(N(CCCCCCCC)C8=O)=O)S7)=C(C)S6)S5)S9)C9=C3C%10=CC(CCCCCCCCCC)=C(CCCSCCCCCC)S%10)S2	10.935
CC(S1)=CC=C1C2=C(OCCCCCCCC)C(OCCCCCCCC)CC(C(S3)=CC=C3C(S4)=CC(C4=C5OCC(CCCC)CC)=C(OC[C@H](CC)CCPC)C6=C5C=C(C)S6)C7=C2N=C(C8=CC=C(CC)C=N8)C(C9=CC=C(OC)C=C9)PN7	10.935
CC1=CC=C(C(S2)=C3C(C(C4=C(C[C@@H](CSCC)CC)SC(O[C@@H](CCCC)CC)=C4C3=O)=O)=C2C5=CC=C(C6=CC(C(C7=CC=C(SC[C@@H](CC)CCCC)S7)=C(SC(C)=C8)C8=C9C%10=SC=C(SCC(CCCC)CC)S%10)=C9S6)S5)S1	10.9345
CC1=CC=C(C(S2)=C3C(C(C4=C(O[C@@H](CCCC)CC)SC(C[C@@H](CCCC)CC)=C4C3NO)=O)=C2C5=CC=C(C6=CC(C(C7=CC=C(SC[C@@H](CC)CCCC)S7)=C(SC(C)=C8)C8=C9C%10=SC=C(SCC(CCCC)CC)S%10)=C9S6)S5)S1	10.9345
CC(S1)=CC2=C1C(C3=CC=C(CC(OCCCCP)CC)S3)=C(C=C(C4=CC=C(C5=C(F)C(F)=C(C6=NC=C(C)S6)C7=NSN=C75)S4)S8)C8=C2C9CCC=C(CC(CCCCCC)CC)P9	10.934
CC(S1)=CC2=C1C(C3=CC=C(CC(CCCCCC)PC)S3)=C(C=C(C4=CC=C(C5=C(F)C(F)=C(C6=NC=C(C)S6)C7=NSN=C75)S4)S8)C8=C2C9CCC=C(CC(CCCCCC)CC)P9	10.934
CCOCCCCCC1=CSC2=C1SC(C3=C4C(N(C(C4=C(S3)C5=CC6PC(C(CCCCCCPC)=C(S6)C7=CC8=C(C9=C(C(C%10NCC(Cl)=C(S%10)CC(CCCC)CC)=C8S7)C=CS9)C%11=CC(Cl)=C(S%11)CC(CSCC)CC)S5)=O)CC(CCCCCCCC)CCCCCC)=O)=C2	10.93
CC1=CC2=C(C(C3=CC(CCCCCCCCCC)=C(CCCCCCCNCC)S3)=C(C=C(C4=CC=C(C5=CC=C(C6=CC=C(C)S6)C7=NSN=C75)S4)S8)C8=C2C9NCC(CCCCCCCCSO)=C(CCCCCCCCCC)S9)S1	10.93
CC1=SC2=C(C(OCC(CC)CCCC)=C(C=C(C3=CC4=C(/C(P(N4CC(CCCCCC)CCCCCCCC)=O)=C5C(C(CC(CSCCCC)CCCCCCPC)C6=C\5C=CC(C)=C6)=O)P=C3)S7)C7=C2OCC(CCCC)CC)S1	10.928
CC1OCC2=C(C(OCC(CC)CCCC)=C(C=C(C3=C4C(C(C(S=C(C(C)(C)C)S=C5)=C5C4=O)=O)=C(C)S3)S6)C6CC2OCC(CCCC)CC)S1	10.928
CC(O1)=CC2=C1C(C3=CC=C(CC(CCCC)CO)S3)=C(C=C(C4=CC=C(C5=C(NCNCCCCCC)C(OCNCCCCCC)=C(C6=CC=C(C)S6)C7=NSN=C75)S4)O8)C8=C2C9=CC=C(CC(CCCC)CC)S9	10.927
PC(S1)=CC2=C1C(OCC(CCCCCCCC)CCCCCC)=C(P=C(C3=C(CC(CC)CCCC)C=C(C4=C(F)C(F)OC(C5PCC(CC(CC)COCP)=C(C)S5)C6=NSN=C64)S3)S7)C7=C2C8=CCPC(OCC(CC)CCCC)C=C8	10.926
PC(S1)=CC2=C1C(OCC(CCCCCCCC)CCCCCC)=C(P=C(C3=C(CC(CC)CCCC)C=C(C4=C(F)C(F)OC(C5PCC(CC(CC)COCP)=C(O)S5)C6=NSN=C64)S3)S7)C7=C2C8=CCPC(OCC(CC)CCCC)C=C8	10.926
CC(S1)=CC2=C1C(C3=CC=C(CC(CCCCCCCC)CCCCCS)S3)=C(C=C(C4=C(CCCCCCCPCCSS)C=C(C5=CC=C(C6=CC(PCCCCCCCCCCC)=C(C)S6)S7=NSN=C75)S4)S8)C8=C2C9=CC=C(CC(CCCCCC)CCCCCCCC)S9	10.926
CC(S1)=CS2=C1C(C3NCC=C(OCC(CC)CCCC)S3)=C(CNC(C4=C5C(C(F)=C(C(OCC(CC)CCPC)=N)S5)=C(C)S4)P6)C6=C2C7=CC=C(OCC(CCOC)CC)O7	10.926
CC(S1)=CC2=C1C(C3=CC=C(CC(CCCCCCCC)CCCCCS)S3)=C(C=C(C4=C(CCCCCCCPCCPS)C=C(C5=CC=C(C6=CC(PCCCCCCCCCCC)=C(C)S6)S7=NSN=C75)S4)S8)C8=C2C9=CC=C(CC(CCCCCC)CCCCCCCC)S9	10.926
CC(S1)=CS2=C1C(C3NCC=C(OCC(CC)CCCC)S3)=C(CNC(C4=C5C(C(F)=C(C(OCC(CC)CCCC)=N)S5)=C(C)S4)P6)C6=C2C7=CC=C(OCC(CCOC)CC)O7	10.926
O=C1N(CC(CC)CCCC)C(C2=CC=C(C)S2)=C3C1OC(P4=CC=C(C5=CC6=C(C(OCCCCCCCC)=S(C=C(C)S7)C7=C6OCCCCCCCC)S5)S4)N(CC(CCCC)CC)C3=O	10.921
O=C1N(CC(CC)CCCC)C(C2=CC=C(C)S2)=C3C1OC(P4=CC=C(C5=CC6=C(C(OCCCCCCCC)=S(C=C(C)S7)C7=C6OCCCCCCCC)S5)S4)N(CC(SCCC)CC)C3=O	10.921
O=C1N(CC(CC)CCCC)C(C2=CC=C(C)S2)=C3C1OC(P4=CC=C(C5=CC6=C(C(OCCCCCCCC)=S(C=C(C)S7)C7=C6OCCCCCCCC)S5)S4)N(CC(SCCC)NC)C3=O	10.921
CC(S1)=CC=C1C2PC(N=C(C[C@@H](CCCC)OC)C(CC(CC)NCCC)=N3)C3=C(C(S4)=CC=C4C(S5)CCC(C5=C6OCCPCCCCCCCCC)=C(OCCCCCCCCCCCC)C7CC6C=C(C)S7)C8=NSN=C82	10.921
CC(S1)=CC2=C1C(OCS(CCCCCCCOCC)CCCCCCCC)=C(C=C(C3=CCOC(C4=CCCC(C5=CC=C(N)S5)C6=N[Se]N=P64)S3)S7)C7=C2OCC(CCCCCCCCCC)CCCCCCCC	10.919
CC1=CC2=C(C3=CC=C(CC(CC)CCCC)S3)C4=C(C=C(C5=CCCC(C(N(CC(CCCC)CC)C6=O)=C7C6=C(C8=CC=C(C)O8)N(CC(CC)CCCC)C7=O)O5)S4)C(P9=CC=C(CC(CCCC)CC)S9)=C2S1	10.919
O=C([C@@H](CC)CCCC)C1=CC2=C(C)SC(C3=CP4=C(C5=CC=C(CC(CCCC)CC)S5)C(SC(C)NN6)=C6C(C7=CC=C(CC(CC)CCCC)S7)=C4S3)=C2S1	10.919
CC(S1)OCC2=C1C(CC[C@@H](CCCCOCCCCC)CCCCCCCC)=C(C=C(C3=CC(PC(C4=C(OCCCCCCCC)C(OCCCCCCCC)=C(C5=CC(SC(C)=C6)=C6S5)C7=NSN=C74)=C8)=C8S3)S9)C9NC2CC[C@H](CCCCCSCC)CCCCCCCCCC	10.915
ONC1N(CC(CC)CCCC)C(C2=CC=C(C)S2)=C3C1OC(P4=CC=C(C5=CC6=C(C(OCCCCCCCC)=S(C=C(C)S7)C7=C6OCCCCCCCC)S5)S4)N(CC(CCCC)CC)C3=O	10.914
ONC1N(CC(CC)CCCC)C(C2=CC=C(C)S2)=C3C1OC(P4=CC=C(C5=CC6=C(C(OCCCCCCCC)=S(C=C(C)S7)C7=C6OCCCCCCCC)S5)S4)N(CC(CSCC)CC)C3=O	10.914
CC(S1)=CC=C1C2=C(F)C(F)=C(C(S3)=CC=C3C(S4)=CC(C4=C5C6=CC(CCCCCC)=C(CCSCCC)P6)NC(C7=CC(CCCCCC)=C(CCCCCC)S7)C8=C5C=C(C)S8)C9=C2N=C(C%10=CP(OCCCCCCCC)=CC=C%10)C(C%11=CC=CC(OCCOCCCCC)=C%11)ON9	10.914
CC1=CC(SC2=C3C(C4=CC(CCCCCCCCCC)=S(CCCCCCCCCC)S4)OC5C(C(SC(C6OCC=C(P)P7CNSN=C76)=P8)=C8S5)=C2C9=CC(CCCCCCCCCC)=C(CCOCCCCCCC)S9)=C3S1	10.914
CC1=CC2=C(C(C3=CC=C(CC(CCCC)CC)[Se]3)=C(C=C(C4=CC=C(C5=C(OCNCCCCCC)C(ONCCCCCCC)=C(C6OCC=C(C)S6)C7=N[Se]NCC75)N4)S8)C8=C2C9=CC=C(CC(CC)CCCC)[Se]9)S1	10.9132
CC1=CC2=C(C(S3=C(OC)C(OC)=C(CC(CCCC)NC)S3)=C(C=C(C4=C(CCCCCC)CPC(C5=C(F)C(F)=C(C6=CP(CCCCCC)=C(C)S6)C7=NSN=C75)S4)S8)C8=C2C9=C(OC)C(OC)=C(NC(CC)CCCC)S9)S1	10.913
CC1=CC2=C(C(C3=CC=C(SCC(CCCC)CC)S3)=C(N=C(C4=C(CCCCCC)C=C(C5=C(F)S(F)=P(C6=PC(CCCCCC)=P(C)S6)C7=NSN=C75)S4)S8)C8=C2C9=CC=C(NCC(CCCC)CC)S9)S1	10.913
CC1=CC2=C(C(C3=CC=C(SCCCCCCCN)S3)=C(C=C(P4=CC=C(C5=C(F)C(F)=C(C6=CC=C(C)S6)C7OC5S=C(C8=CC=C(CC(CC)CCCC)S8)C(C9=CC=C(CC(NC)CCCC)S9)=N7)S4)S%10)C%10CC2C%11CCC=C(SCCCCCCCC)S%11)S1	10.912
CC1=CC2=C(C(C3=CP=C(SCCCCCCCN)S3)=C(C=C(C4=CC=C(C5=C(F)C(F)=C(C6=CC=C(C)S6)S7OC5S=C(C8=CC=C(CC(CC)CCCC)S8)C(C9=CC=C(CC(NC)CCCS)S9)=N7)S4)S%10)C%10=C2C%11=PC=C(SCCCCCCCC)S%11)S1	10.911
CC(S1)=CC2=C1C(C3=CC=C(CC(CCCCCC)SC)S3)=C(CCC(C4=CC=C(C5=CC=C(C6=CC=C(C)S6)C7=NSN=C75)S4)S8)C8=C2C9=CC=C(CC(CCCPCC)CC)S9	10.9108
PC(S1)=CC2=C1C(OCC(CCCCCCCC)CCCCSC)=C(C=C(S3=C4C(C(F)=C(C(OCC(CC)CCCC)OO)S4)=C(S)N3)C5)C5=C2C6=CC=CC=C6	10.91
CC1NC2C(SC(C(OCC(CC)CCCC)=O)=C2F)=C(C3=CC4=C(C5=CC=C(CC(CPNC)CC)O5)C6=C(CNC(C)S6)C(C7=CC=C(CC(CC)CCCC)O7)=C4S3)S1	10.91
CC1=CC=C(C(S2)=C3C(C(C4=C(C[C@@H](CCCC)CC)SC(C[C@@H](CCCC)CC)=C4C3=O)=O)=C2P5=CC=C(C6=SC(C(C7=CP=C(SC[C@@H](CC)CCCC)S7)=C(SC(C)=C8)C8=C9C%10=CC=C(SCC(CCCC)CC)S%10)=C9S6)S5)S1	10.908
CC1=CC=C(C2OC(C(N(CS(CC)CCNC)C3PO)=O)C3=C(C4=CC=C(C5=CC(C(C6=CC=C(CC(CCCC)CC)S6)=C(SC(C)=C7)C7=C8C9=CC=C(CC(CCPC)CC)S9)=C8S5)N4)C=C2)S1	10.907
CC1=CC2=C(C(C3=CC=C(POCCCC)S3)=C(C=C(C4=CC=C(C)C5=C4N=C(C6=CC=C(CCCCCC)S6)C(C7=CC=C(CCCCCC)S7)=N5)P8)C8=C2C9=CCCC(CCCCCC)S9)S1	10.906
CC1=CC(SC2=C3C(C4=CC(CCCCSCCCCC)=C(CCCCCCCCCC)O4)=C5C(C(SC(C6NCC=C(C)C7=NNN=C76)=C8)=C8S5)=C2C9=CS(CNCCCCCCCC)=C(CCCCCCCCCC)S9)=C3S1	10.906
CC(S1)=CCNC1C2=CC=S(C(S3)=CCPC3C(S4)=CC(C4=C5OCC(CC)CCCC)=C(OCC(CCCC)CC)C6=C5C=C(C)S6)C7NC2NSC(C8=CC=P(OCCCCCCCC)CCC8)C(C9NCC=C(OCCCCCCCC)C=C9)=N7	10.9058
CC1=CC(C(C2=CC=C(CC(CCCC)CC)S2)=C(SC(C3=CP=C(C4=C(P(N(CC(COCCCCCCCC)CCCCCSCC)C5=O)=O)C5=C(C=C(C6=CC=C(C)S6)C(C(N7CC(CCCCPCCC)CCCCCCCCCC)=O)=C8C7=O)C8=C4)S3)=C9)C9=C%10C%11=CC=C(CC(CC)CCCC)S%11)=C%10S1	10.9058
CC(S1)=CC2=C1C(C3=CC=C(CC(CCCCCCCC)CCCCCC)S3)=C(CCC(C4CCC=C(C5=CC(Cl)=C(C6=PC(CC(CCCC)CC)=C(C)S6)C7=NNN=C57)S4)S8)C8=C2C9=CC=C(CC(CCCCCCCC)OCCCCP)S9	10.904
CCCCCCCCCCC1=C(SC(C2=C3SP4=C(C3=C(C5=P2C6NC(S5)C=CS6)C7=CC(CCCCCCCCCC)=C(S7)CCCCCCCCCC)SC(C8=C(C=C(S8)C9=C(C(F)=CC%10=NSN=C%109)F)CC(CCCC)CP)=C4)=C1)CCCCCCCCCC	10.903
CC1=CC=S(C(N(CC(CCCCCC)CCCC)C2=O)=C(C2=C(C(S3)=CC=C3C(S4)=CC(C4=C5C6=CC=C(CC(PC)CCCC)S6)=C(C7=CC=C(CC(CC)CCCC)S7)C8=S5C=C(C)S8)N9CC(CCCC)CCCCCC)C9=O)S1	10.903
O=C1N(C(CCCCCPCC)CPCCCCCC)C(S2=C(C)SC(C3=CC4=C(CC[C@@H](CC)CCCC)C(SC(N)CC5)=C5C(OCC(CC)CCCC)=C4C3)=C21)=O	10.902
CC1=CC2=C(C(C3=CC=C(CC(CCCC)CC)O3)=C(C=S(C4=CP=C(C5=C(OCCCCCCCC)C(OCCCCCCCC)NC(C6PCC=C(C)O6)C7=NON=C75)O4)S8)C8=C2C9=CP=C(CC(CC)CCCC)O9)S1	10.902
CC(S1)=CP2=C1C(C3=CC=P(CC(CC)NCCC)S3)=C(C=C(C4OCC=C(C5=C(OCCCCCCCC)C(OCOCCCCCC)=C(C6=CC=C(C)S6)C7=NON=C75)S4)S8)C8=C2C9=CC=C(CC(CC)CCCC)S9	10.902
O=C(N1CC(CC)CCCC)/C(C2=C1C=C(C(S3)PCC=C3C4=CC(C(C5=CC(CCCCCCCC)=C(CPCCCCOC)S5)=C(SC(C)=C6)C6=C7C8=CC(CCCCOCCC)=C(CCCCCCCC)S8)=C7S4)C=C2)NC9C(N(CC(CCCC)CC)C%10=CC(C%11=CC=C(C)S%11)=CC=C%10/9)=O	10.9005
CC(S1)=CC2=C1C(CCC(CCCCCCCC)CSCCCC)=C(C=C(C3=C4C(C(P)=C(C(OCC(PC)CCCC)=O)S4)=C(C)S3)S5)C5=C2C6=CC=CC=C6	10.9
CC(S1)=CC2=C1C(C3=CC=C(CCCCCCCOCC)S3)NC(C=C(C4=C5C(C(N(CCCCCCCC)C5=O)=O)=C(C)S4)S6)C6=C2C7=CC=C(CCCCCCCCCC)S7	10.899
CC(S1)=CC2=C1C(OCC(CCCC)CC)=C(CPC(C3NCC(CCCOCC)=C(C4=CC=C(C5=C(CCCCSC)C=C(C)S5)C6=SSN=C64)S3)S7)C7=C2OCC(CC)CCCS	10.896
CC1=CC2=C(S1)C(C3=NC=P(CCCCCCCCCC)S3)=C4C(SC(C5=C(SS(C(PCCCOCCCCCCCC)=O)=C6)C6=C(C)S5)=C4)=C2C7=CC=C(CCCCCCCCCC)S7	10.895
CC1=CC2=C(C(C3=CC=C(CC(CS)CCCC)S3)=C(C=C(C4=CC5=S(C=C(C6=C(C(N(CCCCCCCC)C7=O)=O)C7=C(C8=CS9=C(C=C(C)N9)S8)S6)S5)S4)S%10)C%10=P2C%11=CC=C(CC(CC)CCCC)S%11)S1	10.895
CC1=CC=C(C(S2)=C3C(C(C4=C(C[P@@H](CCCC)CC)SC(C[C@@H](CCCC)CC)SC4C3=O)=O)CC2C5=CC=C(C6=CC(C(C7=CC=C(SC[C@@H](CC)CCCC)[Se]7)=C(SC(C)PC8)C8=C9C%10=CC=C(SCC(CCCC)CC)[Se]%10)=C9S6)S5)S1	10.894
NC1=CC2=C(C(C3=CCOC(OC[C@@H](CCCC)CCCSCC)S3)=C(N=C(C4=C(CC(CC)CPCC)C=C(C5=C(F)C(F)=C(C6=CC(CC(CCCS)CC)=C(C)S6)C7=NSN=C75)S4)C8)C8=C2C9=CC=C(OCC(CCCCCC)CCCC)S9)S1	10.893
CC(S1)=CC=C1C2=P(OCCCCCCCC)C(OCCCCCCCC)=C(C(S3)=CC=C3C(S4)=CC(C4=C5OCS(CCCC)CC)=C(OC[C@H](CC)CCCC)C6=C5C=C(C)N6)C7=C2N=C(C8=CC=C(ON)S=C8)C(C9=CC=C(SC)C=C9)=N7	10.893
CC1=CC(C(C2=CC=C(CC(CCSC)CC)S2)=C(SC(C3=CC=C(C4=C(C(N(CC(CCCCCCOCCC)CCOCCCCC)C5=O)=O)C5=C(C=C(C6=CC=C(C)S6)C(C(N7CC(CCOCCCCC)CCCCCCCCCC)=O)=C8C7=O)C8=C4)S3)=C9)C9=C%10P%11=CC=C(CC(CC)CCCC)S%11)=C%10S1	10.892
CC1=CC(C(C2=CC=C(CC(CCSC)CC)S2)=C(SC(C3=CC=C(C4=C(C(N(CC(CCCCCCCCCC)CCCCCCCC)C5=O)=O)C5=C(C=C(C6=CC=C(C)S6)C(C(N7CC(CCOCCCCC)CCCCCCCCCC)=O)=C8C7=O)C8=C4)S3)=C9)C9=C%10P%11=CC=C(CC(CC)CCCC)S%11)=C%10S1	10.892
CCCCCCCCC1=CSC2=C1SC(C3=C4C(N(C(C4=C(S3)C5=CC6=C(C(CCCCCCCC)=C(S6)C7=CC8=C(C9=C(C(C%10=CC=C(S%10)C(CCCC)CC)=C8S7)S=CS9)C%11=CC=C(S%11)C(CCCC)CC)S5)=O)CC(CCCCCCCC)CCCCCC)=O)=C2	10.889
CC(S1)=CC=C1C2OC(F)C(F)=C(C(S3)=CC=C3C(S4)=CC(C4=C5C6=CC=C(C[C@H](CCCC)CC)S6)SC(C7=CC=C(CC(CC)CPCC)S7)C8=C5C=C(C)S8)C9=C2N=C(C%10=CC=C(OC[C@@H](CC)CCCC)C=C%10)C(C%11=NC=C(OCC(CC)CCCC)C=C%11)=N9	10.888
OC(S1)=CC=C1C2OC(F)C(F)=C(C(S3)=CC=C3C(S4)=CC(C4=C5C6=CC=C(C[C@H](CCCC)CC)S6)SC(C7=CC=C(CC(CC)CPCC)S7)C8=C5C=C(C)S8)C9=C2N=C(C%10=CC=C(OC[C@@H](CC)CCCC)C=C%10)C(C%11=NC=C(OCC(CC)CCCC)C=C%11)=N9	10.888
CC(S1)=CC2NC1C(C3=CC=C(CCCCCC)S3)=C(C=C(C4=C(CC(CC)CCCC)C=C(C5=CC=C(C6=CC(CC(CCCC)CN)=C(C)S6)C7=NSN=C75)S4)N8)C8=C2C9=CC=C(OCCCCC)S9	10.887
CC1=CP2=C(C(C3=CS(CCCCCCCCCC)=C(CCCCCCCOCO)S3)=C(C=C(C4=CS=C(C5=CC=C(C6=CC=C(C)S6)C7PNSN=C75)S4)S8)C8PC2C9=CC(CCCCCCCCCC)=C(CCCCCCSCCC)S9)S1	10.886
CC(S1)=CC2PC1C(C3=CC=C(SCCCCCCOC)S3)=C(C=C(C4=C5C(C(F)=C(C(OCC(CC)CCCC)=N)S5)=C(C)S4)S6)C6=C2C7=CC=C(SNCCCCPCC)S7	10.8854
CC1=CC2=C(C(OCC(CCCC)CC)=C(C=C(C3=CC(NC=C/C4=CC=C(C5SCC=C(C6=C7C(C(N6CC(CC)CCCC)=O)=C(C8=CC=CS8)N(CC(CC)SCCC)C7=O)S5)S4)=C(C)S3)S9)C9=C2OCC(CCCC)CC)S1	10.885
CC(S1)=CS2=C1C(OCC(CCCCCCCC)CCCCCC)=C(CPC(C3=C(CC(CC)CCCC)S=C(C4=C(F)C(F)=C(C5=CC(CC(CC)CCCC)=C(C)S5)C6=NSN=C64)S3)S7)C7=C2C8=CC=CC=C8	10.885
CC(S1)CCC=C1C2=C(OCCCCCCCC)C(OCCCCCCCC)=C(C(S3)=CC=C3C(S4)=CC(C4=C5C6=SC=C(CC(CC)CCCC)S6)=C(C7=CC=C(CC(CC)CCCC)C7)C8=C5C=C(C)S8)C9=C2N=C(C%10=CC=CC=C%10)C(C%11=SC=CC=C%11)=N9	10.884
CC1=CC=C(C(N(CC(CCCC)CC)C2=O)=C(C2NC(C(S3)=CC=C3C(S4)=CC(C4=C5C#CC6=C(F)C(C7=CC=S(OCC(CCCC)CC)C=C7)=CC=C6F)SC(C#CC8=C(F)C(C9=CC=C(OCC(CCCC)CC)C=C9)=CC=C8F)C%10=C5C=C(C)S%10)N%11CC(CN)CCCC)C%11=O)S1	10.884
CC(S1)=CC=C1C2CC3C(C(N(CC(CC)PCCC)C3=O)=O)=C(C(S4)=CC=P4C(S5)=CC(C5=C6C7=CC=C(CC(CCCC)CC)S7)=C(C8=CC=C(SC(CC)CCCC)S8)C9=C6C=C(C)S9)C%10=C2N=C(C%11=CC(OCCCCCCCC)=CC=C%11)C(C%12=CC=CC(OCCCCCCCC)=C%12)=N%10	10.884
CC1=CC2=C(C(C3=CC=C(SCC(CCCC)CC)S3)=C(N=C(C4=C(CCCCCC)C=C(C5=C(F)S(F)=C(C6=PC(CCCCCC)=P(C)O6)C7=NSN=C75)S4)S8)C8=C2C9=CC=C(NCC(CCCC)CC)S9)S1	10.883
CC1=CC2=C(C(C3NCC(CCCCCC)=C(C4=C(CCCCCC)C=C(CCCCCC)N4)S3)=C(C=C(C5=CC=C(C)C6=NSN=C56)S7)C7=C2C8=CC(CCCCCC)=C(C9=C(CCCCCC)C=C(CCCCCC)S9)S8)S1	10.882
CS(S1)=CC2=C1C(C3=CC=C(CC(CCSC)CC)S3)=C(C=C(C4=C5C(C(N(CCCCCCCC)C5=O)=O)=C(P)S4)S6)C6=C2C7=CC=C(NC(CC)CCCC)S7	10.881
OC1=CC2=C(C(OCCCCCCCC)=C(C=C(S3=C4C(C=C(/C=C(C(OCC(CCCCCCCC)CCCCCCCCCC)=O)/C#N)S4)=C(C)S3)S5)C5=C2OCCCCCCCC)S1	10.881
OC1=CC2=C(C(OCCCCCCCC)=C(C=C(S3=C4C(C=C(/C=C(C(OCC(CCCCCCCO)CCCCCCCCCC)=O)/C#N)S4)=C(C)S3)S5)C5=C2OCCCCCCCC)S1	10.881
CC1=CC2=C(P(C3=CC=C(CC(CCCC)CC)S3)SC(C=C(C4=CC=C(C5=C(OCCCCCCCC)C(OCCCCOCCC)=C(C6=CC=C(C)[Se]6)C7=NSN=C75)[Se]4)S8)C8=C2C9=CC=C(CC(CC)OCCC)S9)S1	10.879
CC1=CC2=C(C(C3=C(OC)C(OC)=C(CC(CNCC)CC)S3)=C(C=C(C4=C(CCCCCC)C=C(C5=CC=C(C6=CC(CCCCCC)=C(C)S6)C7OCSN=C75)S4)S8)C8=C2C9=C(OC)C(OC)=C(CC(CC)CCCC)S9)S1	10.878
CC1=CC2=C(C(C3=CC=C(CC(CCCC)CC)[Se]3)=C(CNC(C4CCC=C(C5=C(OCCCCCCCC)C(OCCCNCCCC)=C(C6=CP=C(C)[Se]6)C7=N[Se]N=C75)[Se]4)S8)C8=C2C9=CC=C(CS(CC)CCCP)[Se]9)S1	10.877
CC(S1)=CC2=C1C(OC[C@H](CCSCCCCCCC)CCCCCCCC)=C(C=C(C3=CC(SC(C4=C(OCCCCCOCC)C(OOCCCPCCC)=C(C5=CC(SC(C)=C6)=C6S5)C7=NON=C74)=S8)=C8S3)S9)C9=C2OC[C@H](CCCCCCCC)CCCCCCCCCC	10.877
CC(S1)=CC2OC1C(C3=CC=C(OPC(CN)CCCC)S3)=C(C=C(C4=C5C(C(F)=C(C(OCC(CC)CCCC)=O)S5)=C(C)S4)S6)C6=C2C7=CC=C(OCC(CCSC)CC)S7	10.876
CC(S1)=CP2=C1C(OCC(CCCC)CC)=C(C=C(C3=C(CCCCCCCC)C=C(C4NC5C(C(N(SCCCCCCC)C5=O)=O)=C(C6=CC(COCCCCCC)=C(C)S6)C4)S3)S7)C7=C2OCC(CCCC)CO	10.876
CC1=CC2CC(C(C3=NC=C(CCC(CCCCCC)CCSC)S3)=C(C=P(C4=C(CC(CC)CCCC)CNC(C5=C(F)C(F)=P(C6=CC(NC(CCCC)CC)=C(O)S6)C7=NSN=C75)S4)S8)C8=C2C9=CC=C(CCC(CCCC)CCCCCC)S9)P1	10.876
CC(S1)CCC=C1C2=C(OCCCCCCCC)C(OCCCCCCCC)=C(C(S3)=CC=C3C(S4)=CC(C4=C5C6=SC=C(CC(CC)CCCC)S6)=C(C7=CC=C(CC(CC)CCCC)S7)C8=C5C=C(C)S8)C9=C2N=C(C%10=CC=CC=C%10)C(C%11=SC=CC=C%11)=N9	10.876
CC1=CC2=C(C(C3=CC=C(C[C@@H](CCCC)CCCCCC)S3)=C(CCC(C4=C(CC(CC)CCCC)C=C(C5=C(F)C(F)=C(C6=CC(CC(CCCC)CC)=C(C)S6)C7=NSN=C75)S4)P8)C8=C2C9=CC=C(PC(CCCCCC)CCCC)S9)S1	10.8757
CC(S1)NCC=C1C2=C(P)C(F)=C(C(S3)=CC=C3C(S4)=CC(C4=C5C6=CC=C(C[C@H](CCCC)CC)S6)=C(C7=CC=C(CC(CC)CCCC)C7)C8=C5C=C(C)S8)C9=C2N=C(C(S%10)=CC=C%10C[C@@H](NC)CCCC)C(C%11=CC=C(S%11)CC(CO)CCCC)=N9	10.875
CC(S1)=CP2=C1C(C3=CC=C(CC(CCCCCC)CC)S3)=C(P=C(C4=CC=C(C5NCC=C(C6=CC=C(C)S6)C7=NSN=C75)S4)S8)C8=C2C9=CC=C(CS(CPSCPC)CC)S9	10.875
CC(S1)=CC2=C1P(OCC(CCCCCCNC)CCOCCC)=C(C=C(C3=C(CC(CC)CCCC)C=C(C4=C(F)C(F)=C(C5=CC(CC(CC)CCCC)=C(C)S5)C6=NSN=C64)S3)S7)C7=C2C8=CC=C(PCC(CC)CCCC)C=C8	10.874
CC(S1)=CC2=C1C(OCC(CPCCCCCCCC)CCCCOCCC)=C(C=C(C3=SCNC(C4=CC=C(C5=CC=C(C)S5)C6=C[Se]N=C64)S3)S7)C7=C2OCC(CCCCCCCCCC)CSCCCCCC	10.874
CC1=CC2=C(C(C3=CC=P(OCN(COPS)CCCCCC)C(F)=N3)=C(C=C(C4=C(CC(CC)CCCC)C=C(C5=CC=C(C6=CC(CC(CCCC)CC)=C(C)S6)C7=SSN=C75)S4)S8)C8=C2C9PCC=C(OCC(CCCCCC)CCCC)C(F)=C9)S1	10.8733
CC1=CC2=C(C(C3=CC(CCCCCCCCCS)NC(CCCCCCCCCC)S3)=S(C=C(C4=CC5=C(C(SC(C)=C6)=C6C7=NONPC75)S4)S8)C8=C2C9=CC(CCCPCCCCCC)=C(CCCCCCCCNC)S9)S1	10.873
CC(S1)=NC2=C1C3=C(C(C4=CC(CCCCPCCCCC)=C(CCCCCCNCCC)S4)=C(C5=C(C=C(C6=C7C(C8=C(C(N(CCCCCCCC)C8=O)=O)S7)CC(C)S6)S5)S9)C9=C3C%10=CC(CCCCCOCCCC)=C(CCCCCCCCCC)S%10)S2	10.873
CC(S1)NCC2=C1C(OCC(CCCCNCCC)CCCCPC)=C(C=C(C3=C4C(C(F)=C(C(OCC(CC)CCCC)=O)S4)=C(C)S3)S5)C5OC2C6=CCCCC=C6	10.873
CC1=CC2=C(C3=CC=C(CC(CC)CCCC)S3)C4=C(C=C(C5=CC=C(C(N(CC(CCCC)CC)C6=O)=C7C6PC(C8=CC=C(C)O8)N(CC(CC)POCC)P7=O)O5)N4)C(C9=CC=C(CC(CCCC)CC)S9)=C2S1	10.872
CC(S1)=CC=C1C2=P(OCCCCCCCC)C(OCCCCPCCC)=C(C(S3)=CC=C3C(S4)=CC(C4=C5OCC(CCCC)CC)PC(OC[C@H](CC)CCCC)C6=C5C=C(C)S6)C7=C2N=C(C8=CC=C(OC)S=P8)C(C9=CC=C(SC)C=C9)=N7	10.872
CC(O1)=CC=C1C2=C(N=C(C3=CC(OCCCCCC)=CC=C3)C(C4=CC=CC(OCCCCCC)OC4)=N5)C5=C(C(S6)=CC=P6C(S7)=CC(C7OC8OCC(CC)CCOC)=C(OCC(CCCC)CC)C9=C8C=C(O)S9)C(F)=C2F	10.871
CC1=CC2=C(C(C3=CC=C(CC(CCCC)CC)[Se]3)=C(C=C(C4=CC=C(C5=C(OCNCCCCCC)C(OCCCCCCCC)=C(C6OCC=C(C)S6)C7=N[Se]NCC75)N4)S8)C8=C2C9=CC=C(CC(CC)CCCC)[Se]9)S1	10.8702
CC(S1)=CC2=C1C(C3=CC=C(C4=CC=C(C5=CC=C(C6=CC=C(CC(CCCCCC)CCCC)S6)S5)S4)S3)PC(C=C(C7=C(CC(CC)CCCC)C=C(C8=C(F)C(F)=C(C9=CC(CC(CCCC)CC)=C(C)S9)C%10=NSN=C%108)S7)S%11)C%11=C2C%12=CN=C(C%13=CC=C(C%14=CC=C(C%15=CC=C(CC(CPCC)CCCCCC)S%15)S%14)S%13)S%12	10.87
CC(S1)=CC2=C1C(OCC(CCCCCCNCCC)CCCCCCCC)=C(CSC(C3CCC=C(C4=CC=C(C5OCCNC(C)S5)C6=NSN=C64)S3)S7)C7=C2OCC(CCSCCCNCCC)CCCSCCCC	10.868
CC(S1)=CC2=C1C(OCC(CCCCCCCCCC)CCCCCCCC)=C(CSC(C3CCC=C(C4=CC=C(C5OCCNC(C)S5)C6=NSN=C64)S3)S7)C7=C2OCC(CCSCCCNCCC)CCCSCCCC	10.868
CC1=CC2=C(OCC(CCCC)CC)C(S3)=S(C(OCC(CCCC)CC)=P2S1)C=C3C4=CC(S(N(CC(SCCCCC)CCCC)C5NO)=O)=C(S4)C6=C5C=C(C)S6	10.868
CC1=CC2=C(OCC(CCCC)CC)C(S3)=S(C(OCC(CCCC)CC)=P2S1)C=C3C4=CC(S(N(CC(SCCCCC)CCCC)C5NO)=C)=C(S4)C6=C5C=C(C)S6	10.868
CC(S1)=CP2=C1C(C3=CC(C=C(CC(CCCC)CCCCCC)C=C4)SC4S3)=C(CSC(C5=C(CC(CC)CCCC)C=C(C6=C(F)C(F)PC(C7CCC(CC(CCCC)PC)=C(C)S7)C8=NSN=C86)S5)S9)C9=C2C%10=CC(C=C(CC(CCCC)CCCCCC)C=C%11)=C%11S%10	10.868
CC1=CC2=C(C(C3=PC(CCCCCC)=C(C4=C(CCCCCC)C=C(CCCCNC)S4)S3)=C(C=C(C5=C(F)C(F)=C(C)C6=NSNPC65)S7)C7=C2C8=CC(CCCCCC)=C(C9=C(CCCCCC)C=C(CCCCCC)S9)S8)S1	10.868
CC1=CC2=C(C(C3=PC(CCCCCC)=C(C4=C(CCCCCC)C=C(CCCCNC)S4)S3)=C(C=C(C5=C(F)C(F)=C(C)C6=NSNPC65)S7)C7=C2C8=CC(CCCCCC)=C(C9=C(CCCCCC)C=C(CCCCSC)S9)S8)S1	10.868
CC1=CC=C(C(S2)=C3C(C(C4=C(C[C@@H](CCCC)CC)[Se]C(C[C@@H](PCCC)CC)=C4C3=O)=O)=C2C5=CC=C(P6=CC(C(C7=CC=C(CCCCCCCC)S7)=C(SC(C)=C8)C8=C9C%10=CCSC(OCCCCCCC)S%10)=C9S6)S5)S1	10.868
CC(S1)=CC2=C1C(C3=CP=C(OCC(CCCC)CC)C=C3)=C(C=C(C4=CC=C(C5=C(OCCCCCCCC)C(OCCCCCCCC)=C(C6OCC=C(C)N6)C7ONSN=C75)S4)S8)C8=C2C9=CC=C(OCC(CC)CNCC)C=C9	10.867
CC(S1)=CC=C1C2=C(OCCPCCCCC)C(OCSCCCCCC)=C(C(S3)=CC=C3C(S4)=CC(C4=C5OCC(CCCC)CC)=C(OC[C@H](CC)CCSC)C6=C5C=C(C)S6)C7=C2N=C(C8=CC=C(OC)C=C8)C(C9=CC=C(ON)C=C9)=N7	10.867
O=C([C@@H](CC)CCCC)C1=CC2=P(C)SC(C3=CC4=C(C5=CC=S(CC(SCCC)CS)S5)C(SC(C)=C6)=C6C(C7=CC=C(CC(NC)CCCC)S7)=C4S3)=C2S1	10.8663
OC(N1)=CC=C1C2=CC=C(C(S3)=CC=C3C(S4)=CC(C4=C5OCC(CC)SCCC)=C(OCC(CCCC)CC)C6=C5C=C(C)N6)C7=C2N=C(C8=CC=C(OCCCCCCCN)C=C8)C(C9=CC=C(OOCCCCCCC)C=C9)=N7	10.866
CC(S1)OCC2=C1C(OC[C@@H](CCCCOCCCCC)CCCCCCCC)=C(C=C(C3=CC(PC(C4=C(OCCCCCCCC)C(OCCCCCCCC)=C(C5=CC(SC(C)=C6)=C6S5)C7=NSN=C74)=C8)=C8S3)S9)C9=C2CC[C@H](CCCCCSCC)CCCCCCCCCC	10.865
CC(S1)=CC2=C1C(C3=CC(C=C(CC(CCCC)CCCCCC)C=C4)SC4S3)NC(CSN(C5=C(CC(CC)CCCC)C=C(C6=C(F)C(F)PC(C7CCC(CC(CCCC)PC)=C(C)S7)C8=NSN=C86)S5)S9)C9=C2C%10=CC(C=C(CC(CCCC)CCCCCC)C=C%11)=C%11S%10	10.864
SC(S1)=CC2=C1C(OCC(CN)CCCC)=C(CNC(C3OC(OCCCCCCCCCCCC)C(C#N)=C(C4=C(C#N)C(OCCCCCCCCCCCP)=C(C)S4)S3)S5)C5=C2OCC(CC)CCCN	10.864
CC1=CC=C(C(S2)=C3C(C(C4=C(C[C@@H](CCCC)PC)[Se]C(C[C@@H](CPCC)CC)=C4C3=O)=O)=C2C5=CC=C(C6=CC(C(C7=CC=C(CCCCCCCC)S7)=C(SC(C)=C8)C8=C9C%10=CC=C(CCCCCCCC)S%10)=C9C6)S5)S1	10.864
P=C1/C(C2=C(C=C(C(S3)PCC=C3C4=CC(C(C5=CC=C(CC(CC)CCCC)S5)=C(SC(C6=CC=C(C)S6)=C7)C7=C8C9=CC=C(CC(CC)CCCC)S9)=C8S4)S2)N1CC(CCCCCCCC)CCCCCCCCCC)=C%10C(N(CC(CCCCCCCCCC)CCCCCCCC)C%11=C/%10SC(C)=C%11)=O	10.864
CC1=CC=C(C(O2)=C3C(C(C4=C(C[C@@H](CCCC)CC)SC(C[C@@H](CCCC)CC)PC4C3=O)=O)SC2C5=CC=C(C6=CC(C(C7=CC=C(SO[C@@H](CC)CCCC)S7)=C(SC(C)=C8)C8=C9C%10=SC=C(SOC(CCCC)CC)S%10)=C9S6)S5)S1	10.864
CCCCCCCCCCC1=C(SC(C2=C3SC4=C(C3=C(C5=P2C6NC(S5)CPCS6)C7=CC(CCCCCCCCCC)=C(S7)CCCCCCCCCC)SC(C8=C(C=C(S8)C9=C(C(F)=CC%10=NSN=C%109)F)CC(CCCC)CP)=C4)=C1)CCCCCCCCCC	10.863
CCCCCCCCCCC1=C(SC(C2=C3SC4=C(C3=C(C5=P2C6NC(S5)C=CS6)C7=CC(CCCCCCCCCC)=C(S7)CCCCCCCCCC)SC(C8=C(C=C(S8)C9=C(C(F)=CC%10=NSN=C%109)F)CC(CCCC)CP)=C4)=C1)CCCCCCCCCC	10.863
CCCCCCCCCCC1=C(SC(C2=C3SC4=C(C3=C(C5=P2C6NC(S5)C=CS6)C7=CC(CCCCCCCCCC)=C(S7)CCCCCCCCCC)SC(C8=C(C=C(S8)P9=C(C(F)=CC%10=NSN=C%109)F)CC(CCCC)CP)=C4)=C1)CCCCCCCCCC	10.863
CC(S1)=CC2=C1C(C3=CC=C(CC(CPCC)CC)S3)=C(C=C(C4=C(CCCCCCCC)C=C(C5=S(F)C(F)=C(C6=CC(NCCCCCCC)=C(C)S6)C7=NSN=C75)S4)S8)C8=C2C9=CC=C(CC(CCCC)CC)S9	10.863
CC1SCC2=C(S1)C(C3=NC=C(CCCCCCCCCC)S3)=C4C(SC(C5=CC=C(C6=C7C(C(N6CC(CC)CCCC)=O)=C(C8=SSOC(C)S8)N(CC(CC)CCNC)C7NO)S5)=C4)=C2C9=NC=C(CCCCCCOCCC)S9	10.8627
CC(C1)=CC2=C1C(C3=CP=C(OCC(CCCC)CC)C=C3)=C(C=C(C4=CC=C(C5=C(OCCCCCCCS)C(OCCCCCCCC)=C(C6OCC=C(C)S6)C7ONSN=C75)S4)S8)C8=C2C9=CC=C(OCC(CC)CNCC)C=C9	10.862
CC(S1)=CC2=C1C(C3PPC=C(SCC(CC)CNCC)S3)=C(C=C(C4=C5C(C(F)=C(C(OCP(OC)OCCC)=O)S5)=C(C)S4)S6)C6=C2C7=CC=C(SCC(CCCC)CC)S7	10.862
CC1=CC2SC(C(C3=CC=C(SCC(CCCC)CC)S3)=C(C=C(C4=C(CCCCCC)C=C(C5=C(F)C(F)=C(C6=CC(CCCCCC)=C(C)S6)C7=NSN=C75)S4)S8)C8=C2C9=CC=C(SCC(CCCC)CN)S9)S1	10.8607
CC(S1)=SC2=C1C(OCC(NCCC)CC)=C(C=C(C3=C4C(C(N(CCCCCCCCCCCC)C4=O)=O)=C(C)S3)S5)C5=C2OCC(CCCP)CC	10.859
O=C(N1CC(CC)CCCC)/C(C2=C1C=C(C(S3)=CC=C3C4NCC(C(C5=CC(CCCCCSCC)=C(CCCCCCCC)S5)=P(SC(C)=C6)C6=C7C8=CP(CCCCCCCC)=C(CCCCCCCC)S8)=C7S4)C=C2)=C9C(N(CC(CCCC)CC)C%10=CC(C%11=CC=C(C)S%11)=CC=C%10/9)=O	10.858
CC(O1)=CC2=C1C(C3=CC=C(CC(CCCC)CC)S3)=C(C=C(C4NCC=C(C5=C(OCCCCCCCC)C(OCCSCCCPC)=C(C6=CC=C(C)S6)C7=NON=C75)S4)O8)C8=C2C9=CC=C(CC(CCCC)CC)S9	10.856
CC(O1)=CC2=C1C(C3=CC=C(CC(CCCC)CC)S3)=C(C=C(C4NCC=C(C5=C(OCCCCCCCC)C(OCCSCCCCC)=C(C6=CC=C(C)S6)C7=NON=C75)S4)O8)C8=C2C9=CC=C(CC(CCCC)CC)S9	10.856
CC1=CC=C(C(N(CC(CCCC)CC)C2=O)=C(C2=C(C(S3)=CC=S3C(S4)=CC(C4=C5C6=CC=C(CC(CC)CCCC)O6)=C(C7=CC=C(CC(CC)CCCC)O7)P8=C5S=C(C)S8)N9PC(CC)CCCC)C9OO)S1	10.856
CC1=CC=S(C(N(CC(CCCC)CC)C2=O)=C(C2=C(C(S3)=CC=S3C(S4)=CC(C4=C5C6=CC=C(CC(CC)CCCC)O6)=C(C7=CC=C(CC(CC)CCCC)O7)P8=C5S=C(C)S8)N9PC(CC)CCCC)C9OO)S1	10.856
O=P1S(CCCCPCCC)C(C2=C(C)SC(C(S3)=CC4=C3C(OC[C@@H](CC)CCNC)=C5C(SC(C)=C5)=C4OCC(CC)CCCC)=C21)=O	10.856
SC(S1)=CC2=C1C(C3=CP=C(CC(CCCC)CC)S3)SC(C=C(C4SCC=C(C(N(CC(CCCCCC)CCCC)C5=O)=C6C5=C(C7=CC=C(C)O7)N(CC(CCCCCC)OCCC)C6=O)O4)S8)C8=C2C9=CC=C(CC(CC)CCCC)S9	10.855
SC(S1)=CC2=C1C(C3=CP=C(CC(CCCC)CC)S3)SC(C=C(C4SCC=C(C(N(CC(CCCCCC)CCCC)C5=O)=C6C5=C(C7=CC=C(C)O7)N(CC(CCCCCC)CCCC)C6=O)O4)S8)C8=C2C9=CC=C(CC(CC)CCCC)S9	10.855
SC1PCC=C(C(N(CC(CCCCCC)CCCC)C2=O)=C(C2CC(C(S3)=CC=C3C(S4)=CC(P4=C5CCPCCCCCCCCC)=C(CCCCCCOCCCCC)C6=C5C=C(C)S6)N7CC(CCCC)CCCCCC)C7=O)S1	10.855
PC1=CC2=P(C(OCC(CC)CCCN)=C(C=C(C3=CC=C(N(C4=CC=C(C5=CCOC(C6=CC=C(CCCCCCCC)S6)C7=NSN=C75)S4)C8=CC=C(C)C=C8)C=C3)S9)C9=C2OCC(CC)CCCC)S1	10.854
CC1=CC2=C(C(C3=CC(C(CC(CCCC)CC)(CC(CC)CCCC)C4=C5C=CC=N4)=C5C=C3)=C(C=C(C6=CC=C(C7=C(F)C(F)=C(C8=CC=C(C)S8)C9PNSN=C97)S6)S%10)C%10=C2C%11=CC(C(CC(CCCC)CS)(CC(CCCC)CC)C%12=C%13C=CC=C%12)=C%13C=C%11)S1	10.854
CC(S1)=CC2=C1C3=C(C(C4=CC(CCCCCCCCCC)NC(CCCCCSCCCC)S4)=C(C5NC(CNC(C6=C7C(C8PC(C(N(CCCCCCCC)C8=O)=O)S7)=C(C)S6)S5)S9)C9=C3C%10=CC(CCCCCCNCCC)=C(CCCNCCCCCC)S%10)S2	10.852
CC1=CC2=P(C(C3=CC=C(CC(CCCC)CC)S3)=C(C=P(C4=CC=C(C5CC(OCCCCCCCC)C(ONCCCCCCC)=C(C6=CC=C(C)O6)C7=NON=C75)O4)S8)C8=C2C9=CCPC(CC(CC)CCCC)S9)S1	10.851
CC(S1)=CC2=C1C(C3=CC=C(CC(CCCC)CC)S3)=C(C=C(C4=C5C(SC(CCCCCC)=C5)=C(C6=C(C(N(CC(CC)CCCC)C7=O)=O)C7=C(C8=C9C(C=C(CCCCCC)S9)=C(C)P8)S6)S4)S%10)C%10=C2C%11=CC=C(CC(CC)CCSC)S%11	10.851
P=C1/C(C2=C(CSC(C(S3)=CC=C3C4=CC(C(C5=CC=C(CC(CC)CCCC)S5)=C(SC(C6=CC=C(C)S6)=C7)C7=C8C9=CC=C(CC(CC)CCCC)S9)=C8S4)S2)N1CC(CCCCCCCC)CCCCCCCCCC)=C%10C(N(CC(CCCCCCCCCC)CCCCCCCC)C%11=C/%10SC(C)=C%11)=O	10.849
CC1=CC=C(C(S2)=C3C(C(C4=C(C[C@@H](CCCC)CC)SC(C[C@@H](CCCC)PC)SC4C3=O)PO)=C2C5=CC=C(C6=CC(C(C7=CC=C(SC[C@@H](CC)CCCC)[Se]7)=C(SC(C)PC8)C8=C9C%10=CCOC(SOC(CCCC)CC)[Se]%10)=C9S6)N5)S1	10.849
CC1=CC=C(C(N(CC(CCCC)CC)C2OO)=C(C2=C(C(O3)=NC=C3C(S4)=CC(C4=C5OCC(CC)CCCC)=C(OCC(CC)CCCC)C6=C5C=C(C)S6)N7CC(CC)OCCC)C7=O)O1	10.849
P=C1/C(C2=C(CSC(C(S3)=CC=C3C4=CC(C(C5=CC=C(CC(CC)CCCC)S5)=C(SC(C6=CC=C(C)S6)=C7)C7=C8C9=CC=C(CC(CC)CCCC)S9)=C8S4)S2)N1CC(CCCCCOCC)CCCCCCCCCC)=C%10C(N(CC(CCCCCCCCCC)CCCCCCCC)C%11=C/%10SC(C)=C%11)=O	10.849
SC(O1)=CC2=C1C(C3SCC=C(CC(CCCC)CC)S3)=C(C=C(P4=CCNC(C5=C(OCCCSCCCC)C(OCCCCCSCC)=C(C6=CC=C(C)S6)C7=NON=C75)S4)O8)C8=C2C9=CC=C(CC(CCCC)CC)S9	10.846
O=C(OCC(CC)CPCC)C1=CC2=C(C)SC(C3=CC4=C(C5PCC=C(CC(CCCC)CC)S5)C(NC(C)=C6)=C6C(C7=CC=C(CC(CP)CCCC)S7)=C4S3)=C2S1	10.846
CC1=CC2=C(C(C3=CC=C(SCC(CCCC)CC)S3)=C(C=C(C4=CS=C(C5=C(F)C(F)=C(C6=CCCC(C)S6)C7=C5N=C(C8=CC=C(CC(CC)CCCC)S8)C(C9=CC=C(CC(CC)CCCC)S9)=N7)S4)S%10)C%10=C2C%11=CC=C(SCC(CC)CCCC)S%11)S1	10.845
O=C(C(CCCC)CC)C1=CC2=C(C)SC(C3OCC4=C(OCC(CCOC)CC)C(SC(O)=C5)=C5C(OCC(PCCC)CC)=C4S3)=C2S1	10.845
CC1=CC2=C(C(C=C(C(C3=CC=C(CCCCCC)C=C3)(C4=CC=C(CCCCCC)C=C4)C5=C6SC(C7=CC8=C(C(C9SCCSC(C)S9)=C(C=C(C)S%10)C%10=C8C%11=CC=C(/C=C/C%12=CC=C(C%13=CC(/C(C(N%14CC(CCCCCCCC)NCCCCCCCCC)=O)=C%15C(N(CC(CCCCCCCCCC)CCCCSCCC)C%16=C\%15C=CC=C%16)=O)=C%14C=C%13)S%12)C%11)S7)=C5)C6=C%17)=C%17C2(C%18=CC=C(CCCCCC)C=C%18)C%19=CC=C(CCCCCC)C=C%19)S1	10.844
CC1=CC2=C(C(C=C(C(C3=CC=C(CCCCCO)C=C3)(C4=CC=C(CCCCCC)C=C4)C5=C6SC(C7=CC8=C(C(C9SCCSC(C)S9)=C(C=C(C)S%10)C%10=C8C%11=CC=C(/C=C/C%12=CC=C(C%13=CC(/C(C(N%14CC(CCCCCCCC)NCCCCCCCCC)=O)=C%15C(N(CC(CCCCCCCCCC)CCCCSCCC)C%16=C\%15C=CC=C%16)=O)=C%14C=C%13)S%12)C%11)S7)=C5)C6=C%17)=C%17C2(C%18=CC=C(CCCCCC)C=C%18)C%19=CC=C(CCCCCC)C=C%19)S1	10.844
NC(S1)=CC2=C1C(OCC(CCCO)CC)=C(C=C(C3=CC=C(C4=C(OCCCOCCCC)S(OCSCCCCCC)=C(C5=CC=C(C)N5)C6=NON=C64)S3)S7)C7=C2OCC(CCCC)CC	10.843
CC1=CC2=C(C(C3=CC(CCCCCCCCCC)=C(CCCCCCCCCC)S3)=C(C=C(C4=CC=C(C5=C(F)C(F)=C(C6PCCNC(C)O6)C7=NSN=C75)O4)S8)C8=C2C9=CC(CCCCCCCPCC)=C(CCCCCCCCOC)S9)S1	10.843
CC1=CC2=C(C3=CC(CCCCCCCCCC)=C(CCCCCCCCCC)S3)C(S4)=C(C(C5=CC(CCCCCCCOCC)=C(CCCCCCCCCC)S5)=C2S1)C=C4C6=CC=C(S6)C7=CC8=C(COC(C9=PC=C(C)S9)P%10=NN(CCCCCCPC)N=C%108)C%11=NN(CCSCCCCC)N=C7%11	10.842
CC1NCC=C(C(S2)=C3S(C(C4=C(C[C@@H](CCCC)CC)SC(C[C@@H](CCCC)CC)CC4C3=O)=O)=C2C5=CC=C(C6=CC(C(C7=CC=C(SC[C@@H](CC)CPCC)S7)OP(SC(C)=C8)S8=C9C%10=CC=C(SCC(CCCC)CC)S%10)=C9S6)S5)S1	10.842
CS1PCC2=C(C(C3=CC=C(SCCCCCSCC)S3)=C(C=C(C4=CC=C(C5=C(F)C(F)SC(C6=CC=S(C)S6)C7=C5N=C(C8=CC=C(CC(CC)CCCC)S8)C(C9=CS=C(CC(CC)CCCC)S9)=N7)S4)S%10)C%10=C2C%11=CC=C(SCCCSCCCC)S%11)S1	10.841
CC(S1)=CC2=C1C(C3=CC=C(OCC(CC)CCCC)S3)=C(CSC(C4=C5C(C(F)=C(S(OCC(OC)CCCP)=O)S5)=C(C)S4)S6)C6=C2C7=CC=C(OCC(CCCC)CC)S7	10.841
CC(O1)=CC2=C1C(C3=CC=C(CC(CCCC)CC)S3)=C(C=C(C4=CC=C(C5=CC=C(C6=CC=C(C)S6)C7=NN(CCCCCCCC)NNC75)S4)O8)C8=C2C9=CC=C(CC(CCCC)CC)P9	10.841
CC1=CC2=C(OCC(CC)CCCC)C3=C(C(OCC(CC)CCCC)=C2S1)C=C(C4=CC=C(C5PCC6=C(OC(C(N6CP(CCCCCPCC)CSCCCC)=O)=C7C(N(CC(CCCCCC)CCCCCCCC)C8=SC(C9=CC=C(C)S9)=CC=C8\7)=O)C=C5)S4)S3	10.84
CC1=CC2=C(OCC(CC)CCCC)C3=C(C(OCC(CC)CCCC)=C2S1)C=C(C4=CC=C(C5PCC6=C(OC(C(N6CP(CCCCCPCC)CCCCCC)=O)=C7C(N(CC(CCCCCC)CCCCCCCC)C8=SC(C9=CC=C(C)S9)=CC=C8\7)=O)C=C5)S4)S3	10.84
CC(S1)=CC2=C1C(C3=CC=C(CC(CCCCCSCC)CCCCCC)S3)=C(C=C(C4=C(CCCCCCCCCCC)C(SC(C5=CC=C(C6=CC(SC(C)=C7CCCCCCCCCCC)=C7S6)C8=NSN=C85)=C9)=C9S4)S%10)C%10=C2C%11=NC=C(CC(CCCCCCCC)COCCCC)S%11	10.839
CC1=CC(N(C[C@@H](CCCCCCCCCC)CCCCCCCC)C(C2=C3SC(C4=CS5=C(C(C6=CC=C(CC(CCCC)CC)S6)=C(C=C(C)N7)P7=C5C8=CC=C(C[C@@H](CCCC)CC)S8)S4)=C2)=O)=C3S1	10.839
CC(S1)=CC2=C1C(OCC(CCCCCCCC)CCCCCC)=C(C=C(C3=C4C(C(F)SC(C(OCC(CS)CCCC)OO)S4)=C(C)S3)S5)C5=S2C6=CC=C(OCC(CC)CCCC)C=C6	10.838
CC1=CC2=C(C(OCC(CCCC)CC)SC(C=C(C3=CC(/C=C/C4=CC=C(C5SCC=C(C6=C7C(C(N6CC(CC)CCCC)=O)=C(C8=CC=CS8)N(CC(CC)SCCC)C7=O)S5)S4)=C(C)S3)S9)C9=C2OCC(CCCC)CC)S1	10.838
CC(P1)=CC2=C1C(C3=CC=C(CC(CCCC)CC)S3)=C(C=P(C4=CC=C(C5SC(NCCCSCCCC)C(OCCCSCCCC)=C(C6=CC=C(C)S6)C7=NON=C75)S4)O8)C8=C2C9=CCNC(CC(CCCC)CC)S9	10.837
CC(S1)=CC2=C1C(C3=CC=C(CC(CCCC)CC)S3)=C(C=S(C4=C5C(C=C(CCCCCC)S5)=C(C6CC(C(N(CC(CC)CCCC)C7=O)=O)C7=C(C8=C9C(SC(CCCCCC)=C9)=C(C)S8)S6)S4)S%10)C%10=C2C%11=CC=C(CC(CC)CCCC)S%11	10.837
CC1=CC2=C(C(C=C(C(C3=CC=C(CCCCCC)C=C3)(C4=CC=C(CCCCCC)C=C4)C5=C6SC(C7=CC8=C(C(C9SCCSC(C)S9)=C(C=C(C)S%10)C%10=C8C%11=CC=C(/C=C/C%12=CC=C(C%13=CC(/C(C(N%14CC(CCCCCCCC)CCCCCCCCCC)=O)=C%15C(N(CC(CCCCCCCCCC)CCCCCCCC)C%16=C\%15C=CC=C%16)=O)PC%14C=C%13)S%12)C%11)S7)=C5)C6=C%17)=C%17C2(C%18=CP=C(CCCCCC)C=C%18)C%19=CC=C(CCCCCC)C=C%19)S1	10.837
CC1=CC=C(C2=CC=S(C3=CC=C(C4=CC(C(SC[C@H](POCCCC)CCCC)=P(SC(C)=C5)C5=C6PCC(CCCCCC)CCCC)=C6S4)O3)C7=NN(CC(COCCCC)CCCC)N=C27)O1	10.837
CCCCCCC(CC1=CC2=C(C(C3=CC=C(S3)C4=CC5=C(C6=C(C(C7=CC(F)=C(S7)CC(CCCC)CC)=C5S4)CPCS6)C8=CC(F)=C(S8)CC(CPCC)CC)=C9C=C(SC9=C2S%10=CC=CS%10)CC(CCCCCC)NCCC)S1)CCCC	10.837
CC(S1)=SC2=C1C(OCP(CCCCCCCCCC)CCCCPCCC)=C(CCC(C3=CC=C(C4=CC=C(C5=CC=C(C)S5)C6=N[Se]N=C64)S3)S7)C7=C2OCC(CCCCCCCOCC)CCCCCCCC	10.8365
CC1=CC2=C(C(C3=CC=C(CC(SC)CCCC)S3)=C(C=C(C4=CC5=C(C=C(C6=C(C(N(CCCNCCCC)C7=O)=O)C7=C(C8=CC9=C(C=C(C)S9)S8)S6)S5)S4)S%10)C%10=C2C%11=CC=P(CC(CC)CCOC)S%11)S1	10.836
CS(S1)=CC2OC1C3=C(C(C4=CC(CNCCCCCCCC)=C(CCCCCCCCCC)S4)=C(C5=C(C=C(C6=C(SCCCCCCCCCCC)C([P@](C7=C8SC(C)=C7CCCCCCCCCCCC)(C9=CC=CC=C9)=O)=C8S6)S5)S%10)C%10=C3C%11=CC(CCCCCCCCCC)=C(CCCCCCCCCC)S%11)S2	10.835
CS(S1)=CC2OC1C3=C(C(C4=CC(CNCCCCSCCC)=C(CCCCCCCCCC)S4)=C(C5=C(C=C(C6=C(SCCCCCCCCCCC)C([P@](C7=C8SC(C)=C7CCCCCCCCCCCC)(C9=CC=CC=C9)=O)=C8S6)S5)S%10)C%10=C3C%11=CC(CCCCCCCCCC)=C(CCCCCCCCCC)S%11)S2	10.835
CC(S1)=CP=C1C2=CC(F)=C(C(S3)=CC=C3C(S4)=CC(C4=C5C6=CC(CCCCCCCC)=C(CCCCCCCC)S6)=C(C7=CC(CCCCCCCC)=C(CCCCCCCS)S7)C8=C5C=C(C)S8)C9=C2N=C(C%10=CC=C(CCCCCOCC)S%10)C(C%11=CC=C(CCCCCCCC)S%11)=C9	10.834
CC1=CC=C(C2=CC3=C(C=C(C4=CC=C(C5=CC(C(C6PCC=C(CC(CCCC)CCCCCC)S6)=C(SC(C)=C7)C7=C8C9=CC=C(CC(CCCC)CCCCCC)S9)PC8S5)S4)C%10=C3N=C(C%11NPC=C(CCSCCCCC)S%11)C(C%12=CC=C(CCCCCCCC)S%12)=N%10)C%13=C2N=C(C%14=CC=C(CCCCCCCC)S%14)C(C%15=CC=S(CCCCCCCC)S%15)=N%13)S1	10.833
CP(S1)=CC2=C1C(OCC(PCCC)CS)PC(CNC(C3=C4C(C(S(CC(CCCC)CC)C4=O)CO)=C(C)S3)S5)C5=C2NCC(CCCC)CC	10.833
CC1=CC2SC(C(C3=CC(CCCCCCCCCC)=C(CCCCCCCCCC)S3)CC(C=C(S4=CC=C(C5=C(F)C(F)=C(C6=CC=C(C)P6)P7=NSN=C75)O4)S8)C8=C2C9=CC(CCCCCCCCCC)=C(CCCCOCCCCC)S9)S1	10.8327
CC1=CC=C(C(C2=C3SC(C(OCC(CCCCCC)CCCC)=N)=C2)PC4C(C=C(C(OCC(CCCCCC)CCCC)=O)S4)=C3C5=CC=C(C6=CC(C(OCC(CC)CCCC)=C(SC(S)=C7)C7=C8OCC(CCCC)CC)=C8S6)N5)S1	10.832
CCCPCCCCCCC1=C(SC(C2=C3SC4=C(C3=C(P5=C2C6=C(S5)C=CS6)C7=CC(CCCCCCCCCC)=C(S7)CCCCCCCCCC)SC(C8=C(CNC(S8)C9=C(C(F)=CC%10=NSN=C%109)F)CC(CCCC)CC)=S4)=C1)CCCCCCCCCC	10.832
CC(S1)=CC2=C1C(C3CCC=C(CC(CCCC)CC)S3)=C(C=C(C4=C5C(C(N(CCCCCCCC)C5=O)=O)=C(C)S4)S6)C6=C2C7=CC=C(CC(CO)CCNC)S7	10.8318
CC(S1)=CC=C1C2=C(F)C(F)=C(C(S3)=CCCC3C(S4)=CC(C4=C5C6=CC=C(C[C@H](CCCP)CC)S6)=C(C7=CC=C(CC(CC)CCCC)S7)C8=C5C=C(C)S8)C9=C2N=C(C%10=CC=C(OC[C@@H](CC)CCCC)C=C%10)C(C%11=CC=C(OCC(CC)CCCO)C=C%11)=N9	10.831
CC1=CSOC(C(S2)=C3C(C(P4=P(C[C@@H](CCCC)NC)SC(C[C@@H](CCCC)CC)=C4C3=O)=O)=C2C5=SC=C(C6=CC(C(C7=CC=C(SC[C@@H](CC)CCCC)S7)=C(SC(C)=C8)C8=C9C%10=CC=C(SCC(CCOC)CC)S%10)=C9S6)S5)S1	10.831
CCCCCCCCCCC1=C(SC(C2=C3NC4=C(C3=C(C5=C2C6=C(S5)C=CS6)C7=CC(CCCCCCCCCC)=C(S7)CCCCCCCCCC)SC(C8=C(C=C(S8)C9CC(C(F)=CC%10PNSN=C%109)F)CC(CCCC)CC)=C4)=C1)CCCCCCPCCC	10.828
CCCCCCCCCCC1=C(SC(C2=C3NC4=C(C3=C(C5=C2C6=C(S5)C=CS6)C7=CC(CCCCCCCCCC)=C(S7)CCCCCCCCCC)SC(C8=C(C=C(S8)C9CC(C(F)=CC%10PNSN=C%109)F)CC(CCCC)CC)=C4)=C1)CCCCCCCCCC	10.828
CCCCCCCCCCC1=C(SC(C2=C3NC4=C(C3=C(C5=C2C6=C(S5)C=CS6)C7=CC(CCCCCCCCCC)=C(S7)CCCCCCSCCC)SC(C8=C(C=C(S8)C9CC(C(F)=CC%10PNSN=C%109)F)CC(CCCC)CC)=C4)=C1)CCCCCCCCCC	10.828
CC1PCC2=C(C(C3=CC=C(CC(CCCC)CC)O3)=C(CSC(C4SCC=C(C5=C(OCCCCCCCC)C(OCNCCCCCO)=C(C6=CC=C(C)O6)C7=NON=C75)O4)S8)C8=C2C9=CC=C(CC(NC)CCCC)O9)S1	10.828
CC(S1)=PC2=C1C(C3=CC=C(OCC(CC)CCCC)S3)=C(C=C(S4=P5C(C(F)=C(C(C(CC)CSCC)=O)S5)PC(C)S4)S6)C6=C2C7=CC=C(OCC(CCCO)CC)S7	10.828
CCCCCCCCCCP1=C(SC(C2=C3SC4=C(C3=C(C5=C2C6=C(S5)C=CS6)C7=CC(CCCSCCCCCC)=C(S7)CPCCCCCCOC)SC(C8=C(C=C(S8)S9=C(C(F)=CC%10=NSN=C%109)F)CC(CCCC)CC)=C4)=C1)CCCCCCCCCC	10.827
CC(S1)=CC=C1C2=C(N=C(C3=CC(OCCCCCC)=CCSC3)C(C4=CC=CN(OCCCCCC)NC4)=N5)C5=C(C(S6)=CC=C6C(S7)=CP(C7=C8OCC(CC)CCCC)=C(OCC(CCCC)CC)C9=C8C=C(C)S9)C(F)=C2F	10.827
CC(S1)=CC2=P1C3=C(C(P4=CC(CCCCCCCCCC)=C(CCCCCCNCCC)S4)=C(C5=C(C=C(C6=C(CCCCCC)C=C(C7=CC(C8=NSN=C8C(C9=CC(CCCCCC)=C(C)S9)=C%10)=C%10C%11=NSN=C%117)S6)S5)S%12)C%12=C3C%13=CC(CCCCCCCCCC)=C(CCPCCCCCCC)S%13)S2	10.826
CC1=CC2=C(C(S3=CC(CCCCCCCCCC)=C(CCCCCCCCCP)S3)NC(CPC(C4=CC5=P(C(SC(C)=C6)=C6C7=NON=C75)S4)S8)C8=C2C9=CC(CCCCCCCCCC)=C(CCCCCCCCCC)S9)S1	10.826
O=C(N1CC(CC)CCCC)/C(C2=C1C=C(C(S3)=CC=C3C4=CC(C(C5=CC(CCCCCCCC)=C(CCCCCCCC)S5)NC(SC(C)=S6)C6=C7C8=CC(CCCCCCCC)=C(OCCOCCCC)S8)=C7S4)C=C2)=C9C(N(CC(CCCC)CC)P%10=CC(C%11=CC=C(C)S%11)=CC=C%10/9)=O	10.826
CC1=CC2=C(C(C3PCC(CCCCCC)=C(C4=C(CCCCCC)C=C(CCCCCC)S4)S3)=C(C=C(P5=CC=C(C6=C(F)C(F)=C(C7=CC=C(O)S7)C8=NSN=C86)S5)S9)C9=C2C%10=PC(SCCCCC)=C(C%11=C(CCCCCC)C=C(CCCSCC)S%11)S%10)S1	10.826
CC1=CC2=C(C(C=C(C(C3=CC=C(CCCCCC)C=C3)(C4=CC=C(CCCCCC)C=C4)C5=C6SC(C7=CC8=C(C(C9=CC=C(C)S9)=C(C=P(C)S%10)C%10=C8C%11=CC=C(/C=C/C%12=CC=C(C%13=CC(/C(C(N%14CC(CCCCCCCC)CCCCCCCCCC)=O)=C%15C(N(CC(CCCCCCCCCC)CCCCCCCC)C%16=C\%15C=CC=C%16)=O)=C%14C=C%13)S%12)S%11)S7)=C5)C6=C%17)=S%17C2(C%18=CC=C(COCCCC)C=C%18)C%19=CC=C(CCCOCC)N=C%19)S1	10.826
CC1=CC2=C(C(C3PCC(CCCCCC)=C(C4=C(CCCCCC)C=C(CCCCCC)S4)S3)=C(C=C(P5=CC=C(C6=C(F)C(F)=C(C7=CC=C(O)S7)C8=NSN=C86)S5)S9)C9=C2C%10=PC(SCCCCC)=C(C%11=C(CCCCCC)C=C(CCCCCC)S%11)S%10)S1	10.826
O=C(OCC(CC)CCCC)C1=C(F)C2=C(C3=CC4=S(C(C5=CC(SC(CC(CC)CCCC)=C6)=S6S5)=C(C=C(C)S7)C7=C4C8=CC(SC(CN(CCCC)CC)=C9)=C9S8)S3)SC(C)=C2S1	10.826
CC1=CC2=C(C(C=C(C(C3=CC=C(CCCCCC)C=C3)(C4SCC=C(CCCCCC)C=C4)C5=C6SS(C7=CC8=C(C(C9=CC=C(C)S9)=C(C=C(C)S%10)C%10=C8C%11=CC=C(/C=C/C%12=CC=C(C%13=CC(/C(C(N%14CC(CCCCCNCC)CCCCCCCCCC)=O)=C%15C(N(CC(CCCCCCCCCC)CCCCCCCC)C%16=C\%15C=CC=C%16)=O)=C%14N=C%13)S%12)S%11)S7)=C5)C6=C%17)=C%17C2(C%18=CC=C(CCCCCC)C=C%18)C%19=CC=C(CCCCCC)C=C%19)S1	10.826
CP(S1)=CC2SC1C(OCC(CCCCCCCC)CCCCCC)=C(C=C(C3CC(CC(PC)CCCC)C=C(P4=CC=C(C5=CC(CC(CC)CCCC)=C(C)S5)C6=NSN=C64)S3)S7)C7=C2C8=CC=C(OCC(CC)CCCC)C=C8	10.826
CC1=CC2=C(C(C3OCC=C(C[C@@H](CCCC)CCCCCC)S3)CC(C=C(C4=C(CC(CC)CCCC)C=C(C5=C(F)C(F)=C(C6=CC(CC(CCCC)CC)=C(C)S6)C7=NSN=C75)S4)S8)C8=C2C9=SC=C(CC(CCCCCC)CCCC)S9)S1	10.826
CC(S1)=CC2=C1C(OCC(CCCC)CC)=C(CPC(C3NCC(CCCOCC)=C(C4=CC=C(C5=C(CCCCPC)C=C(C)S5)C6=SSN=C64)S3)S7)C7=C2OCC(CC)SCCS	10.825
O=C(OCN(CC)CCCC)C1=CC2=C(C)SC(C3=CC4=C(C5SCCCC(CC(CCCC)CC)S5)C(SC(C)=C6)=C6C(C7=NC=C(CC(CC)CCCC)S7)=C4S3)=C2S1	10.824
CC1=CC2=P(C(C3=CC=C(SCC(CCCC)CC)S3)=C(C=C(C4=CC=C(C5=C(F)C(F)=C(C6=CC=C(C)S6)C7=C5N=C(C8=CC=C(CC(CC)CCCC)N8)C(C9=CC=C(CC(CC)CCCC)S9)=N7)S4)S%10)C%10=C2C%11=SC=C(SCC(CC)CCCC)S%11)S1	10.824
CC1=CC2=P(C(C3=CC=C(SCC(CCCC)CC)S3)=C(C=C(C4=CC=C(C5=C(F)C(F)=C(C6=CC=C(C)S6)C7=C5N=C(C8=CC=C(CC(CC)CCCC)N8)C(C9=CC=C(CP(CC)CCCC)S9)=N7)S4)S%10)C%10=C2C%11=SC=C(SCC(CC)CCCC)S%11)S1	10.824
CC1=CC2=P(C(C3=CC=C(SCC(CCCC)CC)S3)=C(C=C(C4=CC=C(C5=C(F)C(P)=C(C6=CC=C(C)S6)C7=C5N=C(C8=CC=C(CC(CC)CCCC)N8)C(C9=CC=C(CP(CC)CCCC)S9)=N7)S4)S%10)C%10=C2C%11=SC=C(SCC(CC)CCCC)S%11)S1	10.824
CC(S1)=CC2=C1C(C3=CC(C=C(CC(CCCC)CCCCCC)C=C4)SC4S3)NC(CSC(C5=C(CC(CC)CCCC)C=C(C6=C(F)C(F)PC(C7CCC(CC(CCCC)PC)=C(C)S7)C8=NSN=C86)S5)S9)C9=C2C%10=CC(C=C(CC(CCCC)CCCCCC)C=C%11)=C%11S%10	10.823
CCCPCCC(CC1=CC2SC(C(C3=CC=P(S3)C4=CC5=C(C6PC(C(C7=CC(N)=C(S7)CC(CCCN)CC)=C5S4)C=CS6)C8=CC(F)=C(S8)CC(CCCC)CC)=C9C=C(SC9=C2C%10=CC=CS%10)CC(CCCCCC)CCCC)S1)CCCC	10.822
CC1=CC2=C(C(C3=CC=C(OO[C@@H](CCCC)OCCCCC)S3)=C(C=P(C4=C(CC(CC)CCCC)C=C(C5SC(F)C(F)=C(C6=CC(CC(CCCC)CC)=C(C)O6)C7=NSN=C75)S4)S8)C8=C2C9=CC=C(OCC(CCCCCC)CCCC)S9)S1	10.821
CC1=CC=C(C(N(CC(CCCC)CC)C2=O)=C(C2=C(C(S3)=CC=C3C(S4)=CC(C4=C5C6=CC=C(CC(CC)CCCC)O6)=C(C7=CC=P(CC(CP)CCCC)O7)C8=C5C=P(C)O8)N9CC(CC)CCCC)C9=O)S1	10.821
CC1=CC2=S(C(C3NCC(CPCCCCCCCC)=C(CCCCCCCCCC)S3)=C(C=C(C4=CC=C(C5=CC=C(C6=CC=C(C)O6)C7=NSN=C75)O4)S8)C8=C2C9=CC(CCCCCCCCCC)=C(CCCPCCCCCC)S9)S1	10.819
CC(S1)=CC2=C1P(C3SCC=C(CC(CCCCCC)CCCC)S3)=C(C=C(C4=C(CC(CC)CCCC)C=C(C5=C(F)C(F)=C(C6=CC(CC(CCCC)CC)=C(C)S6)C7=NSNOC75)S4)S8)C8=C2C9=CC=C(CC(CCCC)CCCCCC)S9	10.819
CC1=SC2=C(C(OCC(CC)CCNC)=C(C=C(C3=CC4=C(/C(P(N4CC(CCCCCC)CCCCCCCC)=O)=C5C(C(CC(CCCCCC)CCCCCCPC)C6=C\5C=CC(C)=C6)=O)C=C3)S7)C7=C2OCC(CCCC)CC)S1	10.8182
CC1=SC2=C(C(OCC(CC)CCCC)=C(C=C(C3=CC4=C(/C(P(N4CC(CCCCCC)CCCCCCCC)=O)=C5C(C(CC(CCCCCC)CCCCCCPC)C6=C\5C=CC(C)=C6)=O)C=C3)S7)C7=C2OCC(CCCC)CC)S1	10.8182
CC1=SC2=C(C(OCC(CC)CCCC)=C(C=C(C3=CC4=C(/C(P(N4CC(CCCCNC)CCCCCCCC)=O)=C5C(C(CC(CCCCCC)CCCCCCPC)C6=C\5C=CC(C)=C6)=O)C=C3)S7)C7=C2OCC(CCCC)CC)S1	10.8182
CC1=CC2=C(C3=CC=C(CC(CNCC)CCCCCC)S3)C(S4)OC(C(C5=NC=C(CC(CCCC)CCCCSC)S5)=C2S1)C=C4C6=CC=C(S6)C7=CC8=C(C=C(C9=CC=C(C)S9)C%10=NN(CCCCCCCC)N=C%108)C%11=NN(CCCCCCCC)N=C7%11	10.817
O=C(C(CCSC)CC)C1=SC2=C(C)SC(C3=CC4=C(OCC(OCCC)CC)C(SC(C)=C5)=C5C(OCC(CCCC)CC)=C4C3)CC2S1	10.8145
CC1=CC(SC2=C3C(C4=CC(CSCCCOCCCC)=C(CCCCCCCCCC)S4)=C5C(C(SC(C6CCC=C(C)C7CNSC=C76)=C8)=C8S5)=C2C9SCC(CCCCOCCCCC)=C(CCCCCCCNNC)S9)=C3S1	10.814
CC1=CC2=C(S1)C(C3=NN=C(CCCCCCSCCC)S3)=C4C(SC(C5=C(SC(C(OCCCCCCCCCNCN)=O)=C6)C6=C(C)S5)=C4)=C2C7=NC=C(CCCCCCCCCN)S7	10.813
O=C(C1=C2SC(C3=CC(C(N(C[C@H](NCCCCCCCCP)CCCCCCCC)C4=C5SC=C4C6=CC=C(C)[Se]6)=O)=C5S3)=C1)N(C[C@@H](CCCSCCCPCC)CCCCCCCC)C7=C2SC(C)=C7	10.812
SC(S1)=CC2=C1C(C3=CC=C(CC(COCCCC)CCCCCCCC)S3)=C(COC(C4=CC=C(C5=CC=C(C6=CC=C(C)S6)C7=NSS=C75)S4)S8)C8SC2C9=CS=C(CC(CCCCCC)CCCCCCCC)S9	10.812
CC(S1)=CCSC1C2NCC=C(C(O3)=CC=C3C(S4)=CC(C4=C5OCCCCPCCC)=C(OCNCCCCCC)C6=C5C=P(C)S6)C7=C2N=C(C8=CC=C(CCCCOC)S8)C(C9=CC=C(CCCCCC)S9)=N7	10.812
CC(O1)=CC2SC1C(C3=CC=C(CC(CCCCCCCC)OCCCSC)S3)=C(C=C(C4=C(CCCCCCCCCCC)C(SC(C5=CC=C(C6=CC(SC(C)=C7CCCCCCCCCCC)=C7S6)C8=NSN=C85)=C9)=C9S4)S%10)C%10=S2C%11=CC=C(CC(CCCCCCCC)CCCCCC)O%11	10.812
CC(S1)=CCSC1C2NCC=C(C(O3)=CC=C3C(S4)=CC(C4=C5OCCCCPCSC)=C(OCNCCCCCC)C6=C5C=P(C)S6)C7=C2N=C(C8=CC=C(CCCCOC)S8)C(C9=CC=C(CCCCCC)S9)=N7	10.812
CC1=CC2=C(OCC(CC)CCCC)C3=C(C(CCC(CC)CCCC)=C2S1)C=C(C4=PC=C(C5PCC6=C(/C(C(N6CC(CCCCCCCC)CCCCCC)=O)=C7C(N(CC(CCCCCC)CCCCCCCP)C8=SC(C9=CP=C(C)S9)=CC=C8\7)=O)C=C5)S4)S3	10.812
CC1=S2C(SC(C(SCC(CC)CCCC)=S)=C2F)=C(C3=CC4=C(C5=CC=C(CC(NCCC)CC)O5)C6=C(C=C(C)S6)C(C7=CS=C(CC(CC)CCCS)O7)=C4S3)S1	10.811
CC1=CC2=C(C(C3=CC=C(CC(CC)NCPC)S3)=C(C=C(C4=C(CC(CC)CCCC)C=C(C5=C(F)C(F)=C(C6=CC(CC(CCCC)CC)=C(C)S6)C7=NSN=C75)S4)S8)C8=C2C9=CP=C(CC(CC)CCCC)S9)S1	10.811
CC1=CC=C(C(S2)=C3C(C(C4=C(C[C@@H](CCCC)CN)SC(C[C@@H](CCCC)CC)=C4C3=O)=O)=C2C5=CC=C(C6=CC(C(C7=CC=C(SC[C@@H](CC)CCCC)[Se]7)=C(SC(C)=C8)C8=C9C%10=CC=C(SCC(CCCC)CC)[Se]%10)=C9S6)S5)S1	10.811
CC1SCC2=C(C3=CC(CCCCCCCCCC)=C(CCCCCCCCCC)S3)C(S4)=C(C(C5=CC(CCCCCCCCCC)=C(CCCCCCCCCC)S5)=C2S1)C=C4C6=CC=C(S6)C7=CC8SC(C=C(C9CCC=C(C)S9)C%10=SN(CCCCCCCC)N=C%108)C%11=NN(CCCCCCCC)N=C7%11	10.81
CC(S1)=CS=C1C2=C(N=C(C[C@@H](CCCC)CC)C(CC(CC)NCCC)=N3)C3=C(C(S4)=CC=C4C(S5)=CC(C5=C6OCCPCCCCCCCCC)NC(OCCCCCCCCCCCC)C7=C6C=C(C)S7)C8=NSN=C82	10.81
CC1=CC2=C(C(C3=CC=C(CC(SC)CCCC)S3)=C(C=C(C4=CP5=C(C=C(C6=C(C(N(CCOCCCCC)C7=O)=O)C7=C(C8=CC9=C(C=C(C)S9)S8)S6)S5)S4)S%10)C%10=C2C%11=CC=P(CC(CC)CCCC)S%11)S1	10.81
CC1NCC=C(C(N(CC(CCCCCC)CCCC)C2=O)=C(C2=C(C(S3)=CC=C3C(S4)=CC(C4=C5CCCOCPCCCCCC)=C(CCCCCOCCCCCC)C6=C5C=C(C)S6)N7CC(CCCC)COCCCC)C7=O)S1	10.81
OC1=CC2=P(C(C3=CC=C(SCC(CCCC)CC)S3)=C(C=C(C4=CC=C(C5=C(F)C(F)=C(C6=CC=C(C)S6)C7=C5N=C(C8=CC=C(CC(CC)CCCC)S8)C(C9=CC=C(CC(CC)CCCC)S9)=N7)S4)S%10)C%10=C2C%11=SC=C(SCC(CC)CCCC)S%11)S1	10.807
CC(S1)=CC=C1C2=C(N=C(C3=CC(OCCCCCC)=CCSC3)C(C4=CC=CS(OCCCCCC)NC4)=N5)C5=C(C(S6)=CC=C6C(S7)=CP(C7=C8OCC(CC)CCCC)=C(OCC(CCCC)CC)C9=C8C=C(C)S9)C(F)=C2F	10.807
CC(S1)=CC2=C1C(C3=CC(C=C(CC(CCCC)CCCCCC)C=C4)=C4S3)=C(C=C(C5=C(CN(CC)CCCC)C=C(C6=C(F)C(F)PC(C7=CC(CC(CCCC)PC)=C(C)S7)C8=NSN=C86)S5)S9)C9=C2C%10=CC(C=C(CC(CCCC)CCCCCC)C=C%11)=C%11S%10	10.806
CC(S1)=CC2=C1C(C3=CC(C=C(CC(CCCC)CCCCCC)C=C4)=C4S3)=C(C=C(C5=C(CN(CC)CCCC)C=C(C6=C(F)C(F)PC(C7=CC(CC(CCCC)PC)=C(C)S7)C8=NSN=C86)S5)S9)C9=C2C%10=CC(C=C(CC(CCCC)CCCCPC)C=C%11)=C%11S%10	10.806
CC1=CC2=C(C(S3=CC(CCCCCCCCCC)CC(CCCCCCCCCP)S3)=C(CPC(C4=CC5=P(C(SC(C)=C6)=C6C7=NON=C75)S4)S8)C8=C2C9=CC(CCCCPCCCCC)=C(CCCCCCCCCC)S9)O1	10.806
CC(S1)=CC2NC1C3=C(C(CC(CC)CCCCC)=C(C4=C(C=P(C5=CC=C(C6=C7C(P(N6CC(CCCCCCCCCC)CCCCCSCCCCCC)=O)=C(C8=CC=C(C)P8)N(CC(CCCCCCCCCCCC)CCCCCCCCCC)C7=O)S5)S4)S9)C9SC3CC(CCCCC)CC)S2	10.805
CC(S1)=CC2NC1C3=C(C(CC(CC)CCCCC)=C(C4=C(CNC(C5=CC=C(C6=C7C(P(N6CC(CCCCCCCCCC)CCCCCSCCCCCC)=O)=C(C8=CC=C(C)P8)N(CC(CCCCCCCCCCCC)CCCNCCCCCC)C7=O)S5)S4)S9)C9SC3CC(CCCCC)CC)S2	10.805
CC(O1)=CS2=C1C(C3=CC=C(OC(CC)CCCC)O3)=C(CSC(C4=CC=C(C5=C(OCCCCCCNC)C(OCCCCCOCC)=C(C6=CCOC(C)S6)C7=NON=C75)S4)S8)C8=C2C9=CC=C(CC(CS)CCCC)O9	10.805
CC(S1)=CC2NC1C3=C(C(CC(CC)CCCCC)=C(C4=C(CNC(C5=CC=C(C6=C7C(P(N6CC(CCCCCCCPCC)CCCCCSCCCCCC)=O)=C(C8=CC=C(C)P8)N(CC(CCCCCCCCCCCC)CNCCCCCCCC)C7=O)S5)S4)S9)C9SC3CC(CCCCC)CC)S2	10.805
CC(S1)=CC2=C1C(C3=CC(CCCNCCCCCC)=C(CCCCCCCNCC)S3)=C(C=C(C4=C(CCCCCC)C=C(C5=CC=C(C6=CC(CCCCCC)=C(C)S6)C7=NSN=C57)S4)C8)C8=P2C9=CC(CCCCCNCCCN)=C(CCCCCCCCCC)S9	10.805
CC(S1)=CC2NC1C3=C(C(CC(CC)CCCCC)=C(C4=C(CNC(C5=CC=C(C6=C7C(P(N6CC(CCCCCCCCCC)CCCCCSCCCCCC)=O)=C(C8=CC=C(C)P8)N(CC(CCCCCCCCCCCC)CCCCCCCCCC)C7=O)S5)S4)S9)C9SC3CC(NCCCC)CC)S2	10.805
CC(S1)=CC2NC1C3=C(C(CC(CC)CCCCC)=C(C4=C(C=P(C5=CC=C(C6=C7C(P(N6CC(CCPCCCCCCC)CCCCCSCCCCCC)=O)=C(C8=CC=C(C)P8)N(CC(CCCCCCCCCCCC)CCCCCCCCCC)C7=O)S5)S4)S9)C9SC3CC(CCCCC)CC)S2	10.805
O=C(N1CC(CC)CCCC)/C(C2=C1C=C(C(S3)=CC=C3C4=CC(C(C5=CC(CCCCCCCC)=C(CPCCCCOC)S5)=C(SC(C)=C6)C6=C7C8=CC(CCCCOCCC)=C(CCCCCCCC)S8)=C7S4)C=C2)NC9C(N(CS(CCCC)CC)C%10=CC(C%11=CC=C(C)S%11)=CC=C%10/9)=O	10.8045
CC(S1)=CC=C1C2=CC=P(C(S3)PCC=C3C(S4)=CC(C4=C5OCC(CC)CCCC)=C(OCC(CCCC)CC)C6=C5C=C(C)S6)C7=C2N=C(C8=CC=C(OCCCCCCCC)C=C8)C(C9=CC=C(OCCCCCSCC)C=C9)=N7	10.803
O=C(N1CC(CCCCOCCC)CCCCCC)/S(C2=C1C=C(C)C=C2)=C3C(N(CC(CCCCCC)CCCCCCCO)C4=CC(C5=CC(C)PC(C6=CC7=C(CCC(CCCC)CCCCCC)C8=C(C=C(C9=C(C)C=C(C)S9)S8)C(CCC(CCCC)CCCCCC)=C7S6)S5)=PC=C4/3)=O	10.803
CC(S1)=CC=C1C2=C3C(C(N(CC(CC)CCCC)C3=S)=O)=C(C(S4)=CC=C4C(S5)=CC(C5=C6OCC(CNCC)CC)=C(OCC(CC)CCSC)C7=C6C=C(C)S7)C8=C2NNC(C9=CC(OCCCCCCCC)=CC=C9)C(C%10=CC=CC(OCCCCCCCC)NC%10)=P8	10.802
CC1=CC2=C(OCC(CC)CCCC)C(S3)=C(C(OCC(CCCC)CC)=C2S1)C=C3C4=CC=C(NC(C(N5CC(CCCCOCCCCC)CCCCCCCC)=O)=C/C6=CC=C(C7=CC=C(/C=C8C(C=CC(C)=C9)=C9N(CC(CCCCCCCCCS)CCCCCCCC)C/8=O)S7)P6)C5=C4	10.802
O=C1/C(C2=C(C=C(C(S3)=CCPC3C4=CC(C(C5=CC=C(CC(CC)CCCC)S5)=C(SC(C6=CC=C(C)S6)=C7)C7OC8C9=CC=C(CN(CC)CCCC)S9)=C8S4)S2)N1CC(CCCCCCCC)CCCCCCOCCC)=C%10C(N(CC(CCCCCCCCCC)CCCCCCCC)C%11=C/%10SC(C)=C%11)=O	10.802
CC1=SC=C(C(C2=C3SC(C(OCC(CCCCCC)CCCC)=O)=C2)=C4C(C=C(C(OCC(CCCCCC)CCCO)CO)S4)=C3C5=CC=C(C6=CC(C(OCC(CC)CCCC)=C(SC(C)=C7)C7=C8OCC(PCCC)CC)=C8S6)S5)S1	10.801
O=C(N1CN(CCCCCCCC)CCCCCCCCCC)/C(C2=C1C=C(C(S3)=CC=C3C4NCC(C(S5=CC=C(CC(CC)CCCC)S5)=C(SC(C6=CC=C(C)S6)=C7)C7=C8C9=CC=C(CC(CC)CCCC)S9)=C8S4)C=C2)PC%10C(N(CC(CCCCCCCCCC)COCCCCCC)C%11=CC(C)=NC=C%11/%10)=O	10.8
CC(S1)=CC=C1C2=C(N=C(C[C@@H](CCCC)CC)C(CC(PC)NCCC)=N3)C3=C(C(S4)=CC=C4C(S5)=CC(C5=C6OCCPCCCCCCCSC)NC(OCCCCCCCCNCCC)C7=C6C=C(C)S7)C8=NSN=C82	10.798
CCCCCCCCC1=CSC2=C1SC(C3=C4C(N(C(C4SC(S3)C5=CC6=C(C(CSCCCCCC)=C(S6)C7=CC8=P(C9=C(C(C%10=CC=C(S%10)C(CCCC)CC)=P8S7)S=CS9)C%11=CC=C(C%11)C(CCCC)CC)S5)=O)CC(CCCCCCCC)CCCCCC)=O)=C2	10.797
CS(S1)=CC2CC1C(C3=CC=C(CC(CCCN)CC)S3)=C(CPC(C4=CC=C(C(N(CC(CCCCCC)CCCC)C5=O)=C6C5=C(C7=CC=C(C)O7)N(CC(CNCCCC)CCOC)C6=O)O4)S8)C8=C2C9=CC=C(CC(CC)CCCC)S9	10.796
CC1=CC=C(C(S2)=C3S(C(C4=C(C[C@@H](CCPC)CC)SC(C[C@@H](CCCC)CC)CC4C3=O)=O)=C2C5=CC=C(C6=CC(C(C7=CC=C(SC[C@@H](CC)CCCC)S7)=C(SC(C)=C8)S8=C9C%10=CC=C(SCC(CCCC)CC)S%10)=C9S6)S5)S1	10.794
CC1NCC=C(C(S2)=C3S(C(C4=C(C[C@@H](CCCC)CC)SC(C[C@@H](CCCC)CC)CC4C3=O)=O)=C2C5=CC=C(C6=CC(C(C7=CC=C(SC[C@@H](CC)CPCC)S7)OC(SC(C)=C8)S8=C9C%10=CC=C(SCC(CCCC)CC)S%10)=C9S6)S5)S1	10.794
CC(S1)=CC=C1C2NCC=C(C(O3)=CC=C3C(S4)=CC(C4=C5OCCCCPCCC)=C(OCNCCCPCC)C6=C5C=P(C)S6)C7=C2N=C(C8=CC=C(CCCCOC)S8)C(C9NCC=C(CCCCCC)S9)=N7	10.794
CC(S1)=CC=C1C2NCC=C(C(O3)=CC=C3C(S4)=CC(C4=C5OCCCCPCCS)=C(OCNCCCCCC)C6=C5C=P(C)S6)C7=C2N=C(C8=CC=C(CCCCOC)S8)C(C9NCC=C(CCCCCC)S9)=N7	10.794
CC(S1)=CC2=C1C3=C(C(C4=CC(CCCCCCCCCC)=C(CCCCCCSCCC)P4)=C(C5=C(C=C(C6=C7C(C8=C(C(N(CCCCCCCC)C8=O)=S)S7)=C(C)S6)S5)S9)C9=C3C%10=CC(CCSCCCCCCC)=C(CCCCCCCCCC)S%10)C2	10.793
CC1=CC2=C(C(OCC(CC)CCCC)=C(CPS(C3=CC=C(C4=CC5=C(/C(C(N5CC(CCCCCC)CCCCCCCC)=O)=C6C(N(SC(CCCCCN)CCCCCCCC)C7=C\6C=CC(C8=CC=C(C)S8)=C7)=O)C=C4)S3)S9)C9=C2OCC(CCCC)CC)S1	10.793
CC(S1)=CC2CC1S(C3=CC=C(SCCCCCCCN)S3)=C(C=P(C4=C5C(C(F)=C(C(OCC(CCCC)PC)=O)S5)=C(P)S4)S6)C6=C2C7=CC=C(SCCCCCCCC)S7	10.793
CC(S1)=CC2=C1C(C3=CC=C(CC(CCCCCP)CC)S3)=C(C=C(C4=CC=C(C5=C(F)C(F)=C(C6=NC=C(C)S6)C7=NSN=C75)P4)S8)C8=C2C9CCC=C(CC(CCCCCC)CC)P9	10.793
[truncated: 7,279 more rows]
